# Supplementary material for: A comparative study of pan-genome methods for microbial organisms: Acinetobacter baumannii pan-genome reveals structural variation in antimicrobial resistance-carrying plasmids
Source: PubMed Central journal article supplement — Microb Genom. 2021 Nov 11;7(11):000690. doi: 10.1099/mgen.0.000690 (PMC8743560; doi:10.1099/mgen.0.000690), 2021-11-11
Supplement: mgen-7-0690-s001.pdf [file mgen-7-0690-s001.pdf]

# A comparative study of pan-genome methods for microbial organisms

Aysun Urhan<sup>1</sup> and Thomas Abeel<sup>1,2,\*</sup>

<sup>1</sup>Delft Bioinformatics Lab, Delft University of Technology Van Mourik Broekmanweg 6, 2628 XE Delft, The Netherlands

<sup>2</sup>Infectious Disease and Microbiome Program, Broad Institute of MIT and Harvard, 415 Main Street, Cambridge, MA 02142, USA

\*contact: t.abeel@tudelft.nl

## Supplementary material

### Supplementary text

In this section we provide a list of all commands and scripts used to run pan-genome tools implemented in the study.

#### 1. Roary

```
roary gff3-input/*.gff -f output/roary -p 4 -v
```

#### 2. Ptolemy

```
java -jar ptolemy.jar extract -g ptolemy-input-list.txt -o output/ptolemy
```

```
java -jar ptolemy.jar syntenic-anchors --db output -o output/ptolemy
```

```
java -jar ptolemy.jar canonical-quiver -s output/ptolemy/syntenic_anchors.txt --db output/ptolemy -o output/ptolemy --dump
```

#### 3. PPanGGolin

```
ppanggolin workflow --anno ppanggolin-input-list.txt --output output/ppanggolin
```

```
ppanggolin write -p output/ppanggolin/pangenome.h5 --families_tsv -o output/ppanggolin
```

```
ppanggolin write -p output/ppanggolin/pangenome.h5 --all_gene_families -o output/ppanggolin -f
```

```
ppanggolin write -p output/ppanggolin/pangenome.h5 --all_genes -o output/ppanggolin -f
```

#### 4. PIRATE

```
./PIRATE -i gff3-input -s "50,70,95" -o output/pirate
```

```
perl pirate-scripts/subsample_outputs.pl -i output/pirate/PIRATE.gene_families.tsv -g output/pirate/modified_gffs/ -o output/pirate/gene_families_prev_locus.tsv --field "prev_locus"
```

```
perl pirate-scripts/gene_cluster_to_binary_fasta.pl -i output/pirate/PIRATE.gene_families.tsv output/pirate/binary_presence_absence.fasta
```

```
FastTree -fastest -nocat -nome -noml -nosupport -nt output/pirate/binary_presence_absence.fasta > output/pirate/binary_presence_absence.nwk 2>/dev/null
```

#### 5. Panaroo

```
python convert_refseq_to_prokka_gff.py -g input.gff -f input.fasta -o output.gff # repeat for all inputs
```



```

# Match the panaroo outputs to ptolemy ORF indices
keeplocus = set(sum(panaroodf.locustag.apply(lambda x: [x] if isinstance(x,str) \
                                             else list(x)),[]))
keeplocus = set(id2orf.locustag.values).intersection(keeplocus)
id2orf = id2orf[id2orf.apply(lambda x: x.locustag in keeplocus, axis=1)].dropna()

df['newid'] = df.index # df with common ORFs, renumbered (0-based)
df.to_csv(ptolemydir, sep='\t', columns=['orf','strain','newid'], header=False, index=False)
id2orf = df.set_index('locustag')

# Remove ORFs discarded by panaroo from all ptolemy index files in the database
keepID = df.index
df = pd.read_table(os.path.join(ptolemydir,'id2fasta.txt'), delimiter='\t', header=None, \
                  index_col=0, names=['id','seq']).loc[keepIDs]
df.to_csv(os.path.join(ptolemydir,'id2fasta.txt'), sep='\t', header=False, index=True)

df = pd.read_table(os.path.join(ptolemydir,'global_z.txt'), delimiter='\t', header=None, \
                  index_col=0).apply(lambda x: set(map(int,x[1].split(','))), axis=1)
df = df.apply(lambda x: ','.join(map(str,x.intersection(keepID))))
df = df.drop(labels=df[df.apply(lambda x: not(x))].index)
df.to_csv(os.path.join(ptolemydir,'global_z.txt'), sep='\t', header=False, index=True)

df = pd.read_table(os.path.join(ptolemydir,'global_z_prime.txt'), delimiter='\t', header=None, \
                  index_col=0)
df.loc[keepID].dropna()[1].to_csv(os.path.join(ptolemydir,'global_z_prime.txt'), \
                                 sep='\t', header=False, index=True)

# Writing out the syntenic anchor file
df = panaroodf.apply(lambda x:
id2orf.loc[set(x.locustag).intersection(keeplocus),'newid'].values,axis=1)
anchors = df.apply(lambda x: ".join(['\t'.join([str(mem), \
        ','.join(map(str,set(x).difference([mem])))+'\n']) \
        for mem in x if len(x)>1]))
anchors[anchors.apply(lambda x: len(x)==0)] = np.nan
anchors.dropna().to_csv(safefile, sep='\t', header=False, index=False, na_rep=None)

```

## 8. Perform GO enrichment study

```
python runGOE.py go.obo orf2go.tsv studyinput.txt goestudy.out
```

## 9. Contents of 'runGOE.py'

```

#!/usr/bin/env python3
from sys import argv
from goatools.obo_parser import GODag

```

```

from goatools.go_enrichment import GOEnrichmentStudy

if __name__ == '__main__':

    obofile = argv[1] # obo file obtained from GO website
    gomapfile = argv[2] # tab-separated file mapping ORFs to GO terms
    studyfile = argv[3] # study input (ORFs)
    if len(argv) > 4:
        outfile = argv[4]
    else:
        outfile = 'goestudy.out'

    godag = GODag(obofile, optional_attrs={'relationship'}) # load obo file
    with open(gomapfile, 'r') as f: # load mapping orf -> go IDs
        gomap = {}
        for line in f:
            orf,go = line.strip().split('t')
            go = go.split(' ')
            gomap[orf] = go
        pop = set(gomap.keys())
    with open(studyfile, 'r') as f: # load study orf
        study = set([line.strip() for line in f])
        study = study.intersection(pop)

    # Create the GOE study object
    g = GOEnrichmentStudy(pop, gomap, godag, propagate_counts=False, alpha=0.01, \
        methods='fdr_bh')
    results = g.run_study(study) # run study
    g.wr_tsv(outfile, results) # save the study results to a tab-separated file

```

## Supplementary tables and figures

Table S1. Genbank accession numbers of *Acinetobacter baumannii* assemblies used in this study.

| Accession  | Strain     |
|------------|------------|
| AP013357.1 | NCGM 237   |
| AP014649.1 | IOMTU 433  |
| CP024911.1 | AB307-0294 |
| CP003846.1 | BJAB07104  |
| CP003847.1 | BJAB0715   |
| CP003849.1 | BJAB0868   |
| CP003856.1 | TYTH-1     |
| CP007535.2 | AC29       |
| CP007577.1 | AC30       |
| CP008706.1 | AB5075-UW  |
| CP009256.1 | AB031      |

|            |              |
|------------|--------------|
| CP009257.1 | AB030        |
| CP009534.1 | AbH12O-A2    |
| CP010397.1 | 6200         |
| CP010779.1 | XH386        |
| CP010781.1 | A1           |
| CP012006.1 | Ab04-mff     |
| CP012952.1 | D36          |
| CP013924.1 | KBN10P02143  |
| CP014215.1 | YU-R612      |
| CP014528.1 | XH858        |
| CP014539.1 | XH859        |
| CP014540.1 | XH857        |
| CP014541.1 | XH856        |
| CP015364.1 | 3207         |
| CP015483.1 | ORAB01       |
| CP016298.1 | CMC-MDR-Ab59 |
| CP017152.1 | DU202        |
| CP017642.1 | KAB01        |
| CP017644.1 | KAB02        |
| CP017646.1 | KAB03        |
| CP017648.1 | KAB04        |
| CP017650.1 | KAB05        |
| CP017652.1 | KAB06        |
| CP017654.1 | KAB07        |
| CP017656.1 | KAB08        |
| CP018143.1 | HRAB-85      |
| CP018254.1 | AF-401       |
| CP018256.1 | AF-673       |
| CP018332.1 | A1296        |
| CP018421.1 | XDR-BJ83     |
| CP018664.1 | ATCC 17978   |
| CP020574.1 | 15A5         |
| CP020578.1 | SSA12        |
| CP020579.1 | SAA14        |
| CP020581.1 | SSMA17       |
| CP020584.1 | JBA13        |
| CP020586.1 | CBA7         |
| CP020590.1 | 15A34        |
| CP020591.1 | SSA6         |
| CP020592.1 | USA2         |
| CP020595.1 | USA15        |
| CP020597.1 | HWBA8        |
| CP020598.1 | WKA02        |
| CP021342.1 | B8342        |
| CP021347.1 | B8300        |

|            |                  |
|------------|------------------|
| CP021782.1 | A85              |
| CP024124.1 | AYP-A2           |
| CP024576.1 | AbPK1            |
| CP024611.1 | Ab4977           |
| CP024612.1 | Ab4653           |
| CP024613.1 | Ab4568           |
| CP001172.1 | AB307-0294_2     |
| CP025266.1 | SMC_Paed_Ab_BL01 |
| CP027704.1 | DS002            |
| CU459141.1 | AYE              |
| CU468230.2 | SDF              |
| LN865143.1 | CIP70.10         |
| LN868200.1 | R2090            |
| LN997846.1 | R2091            |

Table S2. Ptolemy graph size at different values of synteny neighborhood size (f).

|         | # of nodes | # of edges | # of CCs |
|---------|------------|------------|----------|
| f = 5   | 19,541     | 32,420     | 28       |
| f = 10* | 20,140     | 31,946     | 34       |
| f = 15  | 21,614     | 33,184     | 45       |
| f = 20  | 22,149     | 33,106     | 47       |

Table S3. Proportion of common GO terms identified as significantly enriched in isolate DS002 using outputs of different pan-genome tools.

|            | Ptolemy | Panaroo | PIRATE | PPanGGoLin | Roary |
|------------|---------|---------|--------|------------|-------|
| Ptolemy    |         | 0.15    | 0.05   | 0.67       | 0.20  |
| Panaroo    | 0.71    |         | 0.32   | 0.97       | 0.68  |
| PIRATE     | 0.50    | 0.63    |        | 1.00       | 0.94  |
| PPanGGoLin | 0.66    | 0.20    | 0.11   |            | 0.26  |
| Roary      | 0.69    | 0.50    | 0.36   | 0.93       |       |



Table S4. GO enrichment study results for GO terms related to antimicrobial resistance.

| Ptolemy    |    |      | Panaroo    |    |      | PIRATE     |    |      | PPanGGolin |    |      | Roary      |    |      |
|------------|----|------|------------|----|------|------------|----|------|------------|----|------|------------|----|------|
| GO         | NS | pval |
| GO:0006541 | BP | 0.19 | GO:0055085 | BP | 1    | GO:0006412 | BP | 1    | GO:0006412 | BP | 0.01 | GO:0006412 | BP | 0.98 |
| GO:0005975 | BP | 0.34 | GO:0006289 | BP | 1    | GO:0006865 | BP | 1    | GO:0005975 | BP | 0.50 | GO:0005975 | BP | 1    |
| GO:0000105 | BP | 0.53 | GO:0046274 | BP | 1    | GO:0006289 | BP | 1    | GO:0006541 | BP | 0.92 | GO:0006457 | BP | 1    |
| GO:0006189 | BP | 0.55 | GO:0000716 | BP | 1    | GO:0046274 | BP | 1    | GO:0008033 | BP | 1    | GO:0006541 | BP | 1    |
| GO:0006412 | BP | 0.82 | GO:0031669 | BP | 1    | GO:0000716 | BP | 1    | GO:0000105 | BP | 1    | GO:0006260 | BP | 1    |
| GO:0015986 | BP | 0.90 | GO:0016051 | BP | 1    | GO:0031669 | BP | 1    | GO:0006189 | BP | 1    | GO:0032259 | BP | 1    |
| GO:0009073 | BP | 0.90 | GO:0019305 | BP | 1    | GO:0016051 | BP | 1    | GO:0006281 | BP | 1    | GO:0006289 | BP | 1    |
| GO:0009228 | BP | 0.92 | GO:0009229 | BP | 1    | GO:0019305 | BP | 1    | GO:0009229 | BP | 1    | GO:0046274 | BP | 1    |
| GO:0009423 | BP | 0.92 | GO:0043165 | BP | 1    | GO:0009229 | BP | 1    | GO:0006520 | BP | 1    | GO:0031669 | BP | 1    |
| GO:0032259 | BP | 1    | GO:1990481 | BP | 1    | GO:0043165 | BP | 1    | GO:0006096 | BP | 1    | GO:0016051 | BP | 1    |
| GO:0006094 | BP | 1    | GO:0015741 | BP | 1    | GO:1990481 | BP | 1    | GO:0044205 | BP | 1    | GO:0019305 | BP | 1    |
| GO:0006400 | BP | 1    | GO:0009102 | BP | 1    | GO:0015741 | BP | 1    | GO:0009097 | BP | 1    | GO:1990481 | BP | 1    |
| GO:0006284 | BP | 1    | GO:0032955 | BP | 1    | GO:0032955 | BP | 1    | GO:0015986 | BP | 1    | GO:0015741 | BP | 1    |
| GO:0009236 | BP | 1    | GO:0009143 | BP | 1    | GO:0009143 | BP | 1    | GO:0006364 | BP | 1    | GO:0032955 | BP | 1    |
| GO:0009229 | BP | 1    | GO:0009156 | BP | 1    | GO:0009156 | BP | 1    | GO:0001522 | BP | 1    | GO:0009143 | BP | 1    |
| GO:0009086 | BP | 1    | GO:0019294 | BP | 1    | GO:0019294 | BP | 1    | GO:0009073 | BP | 1    | GO:0009156 | BP | 1    |
| GO:0006520 | BP | 1    | GO:0046687 | BP | 1    | GO:0046687 | BP | 1    | GO:0009306 | BP | 1    | GO:0019294 | BP | 1    |
| GO:0006096 | BP | 1    | GO:0019069 | BP | 1    | GO:0019069 | BP | 1    | GO:0009228 | BP | 1    | GO:0046687 | BP | 1    |
| GO:0015074 | BP | 1    | GO:0061818 | BP | 1    | GO:0061818 | BP | 1    | GO:0009423 | BP | 1    | GO:0019069 | BP | 1    |
| GO:0006457 | BP | 1    | GO:0006428 | BP | 1    | GO:0006428 | BP | 1    | GO:0006457 | BP | 1    | GO:0061818 | BP | 1    |
| GO:0006099 | BP | 1    | GO:0006974 | BP | 1    | GO:0046416 | BP | 1    | GO:0006289 | BP | 1    | GO:0006428 | BP | 1    |
| GO:0051301 | BP | 1    | GO:0046416 | BP | 1    | GO:0006402 | BP | 1    | GO:0046274 | BP | 1    | GO:0046416 | BP | 1    |
| GO:0042274 | BP | 1    | GO:0051301 | BP | 1    | GO:0006796 | BP | 1    | GO:0031669 | BP | 1    | GO:0006402 | BP | 1    |
| GO:0006817 | BP | 1    | GO:0006402 | BP | 1    | GO:0015739 | BP | 1    | GO:0016051 | BP | 1    | GO:0006796 | BP | 1    |
| GO:0019557 | BP | 1    | GO:0006796 | BP | 1    | GO:0002143 | BP | 1    | GO:0019305 | BP | 1    | GO:0015739 | BP | 1    |
| GO:0019556 | BP | 1    | GO:0015739 | BP | 1    | GO:0071139 | BP | 1    | GO:1990481 | BP | 1    | GO:0002143 | BP | 1    |
| GO:0008615 | BP | 1    | GO:0002143 | BP | 1    | GO:0015803 | BP | 1    | GO:0015741 | BP | 1    | GO:0071139 | BP | 1    |
| GO:0006207 | BP | 1    | GO:0071139 | BP | 1    | GO:0071766 | BP | 1    | GO:0032955 | BP | 1    | GO:0015803 | BP | 1    |
| GO:0055129 | BP | 1    | GO:0015803 | BP | 1    | GO:0042838 | BP | 1    | GO:0009143 | BP | 1    | GO:0042621 | BP | 1    |
| GO:0043708 | BP | 1    | GO:0042621 | BP | 1    | GO:0043419 | BP | 1    | GO:0009156 | BP | 1    | GO:0071766 | BP | 1    |
| GO:0015937 | BP | 1    | GO:0071766 | BP | 1    | GO:0048255 | BP | 1    | GO:0019294 | BP | 1    | GO:0042838 | BP | 1    |
| GO:0030163 | BP | 1    | GO:0042838 | BP | 1    | GO:0006283 | BP | 1    | GO:0019069 | BP | 1    | GO:0043419 | BP | 1    |
| GO:0045454 | BP | 1    | GO:0043419 | BP | 1    | GO:0000455 | BP | 1    | GO:0061818 | BP | 1    | GO:0048255 | BP | 1    |
| GO:0019290 | BP | 1    | GO:0048255 | BP | 1    | GO:0018189 | BP | 1    | GO:0006428 | BP | 1    | GO:0000455 | BP | 1    |
| GO:0006605 | BP | 1    | GO:0006283 | BP | 1    | GO:0006534 | BP | 1    | GO:0046416 | BP | 1    | GO:0018189 | BP | 1    |
| GO:0009088 | BP | 1    | GO:0000455 | BP | 1    | GO:0051304 | BP | 1    | GO:0006402 | BP | 1    | GO:0006534 | BP | 1    |
| GO:0016226 | BP | 1    | GO:0018189 | BP | 1    | GO:0045333 | BP | 1    | GO:0006796 | BP | 1    | GO:0051304 | BP | 1    |
| GO:0006526 | BP | 1    | GO:0006534 | BP | 1    | GO:0009103 | BP | 1    | GO:0015739 | BP | 1    | GO:0045333 | BP | 1    |
| GO:0009089 | BP | 1    | GO:0006423 | BP | 1    | GO:0006415 | BP | 1    | GO:0002143 | BP | 1    | GO:0006415 | BP | 1    |
| GO:0006308 | BP | 1    | GO:0051304 | BP | 1    | GO:0018106 | BP | 1    | GO:0071139 | BP | 1    | GO:0018106 | BP | 1    |
| GO:0098721 | BP | 1    | GO:0045333 | BP | 1    | GO:0006229 | BP | 1    | GO:0015803 | BP | 1    | GO:0006229 | BP | 1    |



|            |    |   |            |    |   |            |    |   |            |    |   |            |    |   |
|------------|----|---|------------|----|---|------------|----|---|------------|----|---|------------|----|---|
| GO:0017148 | BP | 1 | GO:0009103 | BP | 1 | GO:0006308 | BP | 1 | GO:0042621 | BP | 1 | GO:0006308 | BP | 1 |
| GO:0046416 | BP | 1 | GO:0006415 | BP | 1 | GO:0006099 | BP | 1 | GO:0071766 | BP | 1 | GO:0016310 | BP | 1 |
| GO:0060567 | BP | 1 | GO:0018106 | BP | 1 | GO:0016310 | BP | 1 | GO:0043419 | BP | 1 | GO:0055130 | BP | 1 |
| GO:1990481 | BP | 1 | GO:0006229 | BP | 1 | GO:0055130 | BP | 1 | GO:0048255 | BP | 1 | GO:0019509 | BP | 1 |
| GO:0018298 | BP | 1 | GO:0006308 | BP | 1 | GO:0030655 | BP | 1 | GO:0000455 | BP | 1 | GO:0030655 | BP | 1 |
| GO:0052865 | BP | 1 | GO:0006099 | BP | 1 | GO:2000766 | BP | 1 | GO:0018189 | BP | 1 | GO:2000766 | BP | 1 |
| GO:0002100 | BP | 1 | GO:0016310 | BP | 1 | GO:0002943 | BP | 1 | GO:0006534 | BP | 1 | GO:0002943 | BP | 1 |
| GO:0031670 | BP | 1 | GO:0055130 | BP | 1 | GO:0106035 | BP | 1 | GO:0051304 | BP | 1 | GO:0106035 | BP | 1 |
| GO:0036265 | BP | 1 | GO:0019509 | BP | 1 | GO:0045881 | BP | 1 | GO:0045333 | BP | 1 | GO:0045881 | BP | 1 |
| GO:0009165 | BP | 1 | GO:0030655 | BP | 1 | GO:0009061 | BP | 1 | GO:0006229 | BP | 1 | GO:0032297 | BP | 1 |
| GO:0015853 | BP | 1 | GO:2000766 | BP | 1 | GO:0032297 | BP | 1 | GO:0006308 | BP | 1 | GO:0071281 | BP | 1 |
| GO:1903401 | BP | 1 | GO:0002943 | BP | 1 | GO:0071281 | BP | 1 | GO:0006099 | BP | 1 | GO:0030163 | BP | 1 |
| GO:0036289 | BP | 1 | GO:0106035 | BP | 1 | GO:0030163 | BP | 1 | GO:0055130 | BP | 1 | GO:0045004 | BP | 1 |
| GO:0051252 | BP | 1 | GO:0045881 | BP | 1 | GO:0045004 | BP | 1 | GO:0030655 | BP | 1 | GO:0009651 | BP | 1 |
| GO:0051304 | BP | 1 | GO:0009061 | BP | 1 | GO:0009651 | BP | 1 | GO:2000766 | BP | 1 | GO:0006226 | BP | 1 |
| GO:0009992 | BP | 1 | GO:0032297 | BP | 1 | GO:0006226 | BP | 1 | GO:0002943 | BP | 1 | GO:0044179 | BP | 1 |
| GO:0006413 | BP | 1 | GO:0071281 | BP | 1 | GO:0044179 | BP | 1 | GO:0106035 | BP | 1 | GO:0045900 | BP | 1 |
| GO:0019305 | BP | 1 | GO:0030163 | BP | 1 | GO:0045900 | BP | 1 | GO:0045881 | BP | 1 | GO:0019284 | BP | 1 |
| GO:0006650 | BP | 1 | GO:0045004 | BP | 1 | GO:0009432 | BP | 1 | GO:0032297 | BP | 1 | GO:0009432 | BP | 1 |
| GO:0006637 | BP | 1 | GO:0009651 | BP | 1 | GO:0045911 | BP | 1 | GO:0071281 | BP | 1 | GO:0045911 | BP | 1 |
| GO:0035999 | BP | 1 | GO:0006226 | BP | 1 | GO:0006593 | BP | 1 | GO:0030163 | BP | 1 | GO:0006593 | BP | 1 |
| GO:0015689 | BP | 1 | GO:0044179 | BP | 1 | GO:1903830 | BP | 1 | GO:0045004 | BP | 1 | GO:1903830 | BP | 1 |
| GO:0048034 | BP | 1 | GO:0045900 | BP | 1 | GO:0009305 | BP | 1 | GO:0009651 | BP | 1 | GO:0009305 | BP | 1 |
| GO:0060326 | BP | 1 | GO:0019284 | BP | 1 | GO:0042873 | BP | 1 | GO:0006226 | BP | 1 | GO:0042873 | BP | 1 |
| GO:0043086 | BP | 1 | GO:0009432 | BP | 1 | GO:0043086 | BP | 1 | GO:0044179 | BP | 1 | GO:0043086 | BP | 1 |
| GO:0034227 | BP | 1 | GO:0045911 | BP | 1 | GO:1902280 | BP | 1 | GO:0045900 | BP | 1 | GO:1902280 | BP | 1 |
| GO:0009092 | BP | 1 | GO:0006593 | BP | 1 | GO:0042619 | BP | 1 | GO:0009432 | BP | 1 | GO:0042619 | BP | 1 |
| GO:0016024 | BP | 1 | GO:1903830 | BP | 1 | GO:0046306 | BP | 1 | GO:0045911 | BP | 1 | GO:0046306 | BP | 1 |
| GO:0016075 | BP | 1 | GO:0009305 | BP | 1 | GO:0000256 | BP | 1 | GO:0006593 | BP | 1 | GO:0000256 | BP | 1 |
| GO:0018117 | BP | 1 | GO:0042873 | BP | 1 | GO:0010124 | BP | 1 | GO:0009305 | BP | 1 | GO:0043093 | BP | 1 |
| GO:0009437 | BP | 1 | GO:0043086 | BP | 1 | GO:0034220 | BP | 1 | GO:0043086 | BP | 1 | GO:0034220 | BP | 1 |
| GO:0034552 | BP | 1 | GO:1902280 | BP | 1 | GO:0006417 | BP | 1 | GO:1902280 | BP | 1 | GO:0060274 | BP | 1 |
| GO:0015851 | BP | 1 | GO:0042619 | BP | 1 | GO:0060274 | BP | 1 | GO:0042619 | BP | 1 | GO:0015968 | BP | 1 |
| GO:0006105 | BP | 1 | GO:0046306 | BP | 1 | GO:0015968 | BP | 1 | GO:0046306 | BP | 1 | GO:0051604 | BP | 1 |
| GO:0006515 | BP | 1 | GO:0000256 | BP | 1 | GO:0051604 | BP | 1 | GO:0000256 | BP | 1 | GO:0000270 | BP | 1 |
| GO:0006865 | BP | 1 | GO:0043093 | BP | 1 | GO:0000270 | BP | 1 | GO:0060274 | BP | 1 | GO:0002132 | BP | 1 |
| GO:0019288 | BP | 1 | GO:0010124 | BP | 1 | GO:0002132 | BP | 1 | GO:0015968 | BP | 1 | GO:0022904 | BP | 1 |
| GO:0015912 | BP | 1 | GO:0034220 | BP | 1 | GO:0043039 | BP | 1 | GO:0051604 | BP | 1 | GO:0015820 | BP | 1 |
| GO:0030490 | BP | 1 | GO:0006417 | BP | 1 | GO:0022904 | BP | 1 | GO:0002132 | BP | 1 | GO:0015816 | BP | 1 |
| GO:0006529 | BP | 1 | GO:0060274 | BP | 1 | GO:0015820 | BP | 1 | GO:0022904 | BP | 1 | GO:0000160 | BP | 1 |
| GO:0043952 | BP | 1 | GO:0015968 | BP | 1 | GO:0015816 | BP | 1 | GO:0015820 | BP | 1 | GO:0006235 | BP | 1 |
| GO:0072344 | BP | 1 | GO:0051604 | BP | 1 | GO:0019271 | BP | 1 | GO:0015816 | BP | 1 | GO:0006805 | BP | 1 |
| GO:0008610 | BP | 1 | GO:0000270 | BP | 1 | GO:0006782 | BP | 1 | GO:0006235 | BP | 1 | GO:0019877 | BP | 1 |
| GO:0006119 | BP | 1 | GO:0002132 | BP | 1 | GO:0006235 | BP | 1 | GO:0006805 | BP | 1 | GO:0006523 | BP | 1 |
| GO:0071470 | BP | 1 | GO:0043039 | BP | 1 | GO:0006805 | BP | 1 | GO:0006523 | BP | 1 | GO:0051290 | BP | 1 |

|            |    |   |            |    |   |            |    |   |            |    |   |            |    |   |
|------------|----|---|------------|----|---|------------|----|---|------------|----|---|------------|----|---|
| GO:0006069 | BP | 1 | GO:0022904 | BP | 1 | GO:0019877 | BP | 1 | GO:0009593 | BP | 1 | GO:0009593 | BP | 1 |
| GO:0006561 | BP | 1 | GO:0015820 | BP | 1 | GO:0006523 | BP | 1 | GO:0006612 | BP | 1 | GO:0006612 | BP | 1 |
| GO:0045017 | BP | 1 | GO:0015816 | BP | 1 | GO:0051290 | BP | 1 | GO:0009442 | BP | 1 | GO:0009442 | BP | 1 |
| GO:0015822 | BP | 1 | GO:0000160 | BP | 1 | GO:0009593 | BP | 1 | GO:0009246 | BP | 1 | GO:0043215 | BP | 1 |
| GO:0071963 | BP | 1 | GO:0019271 | BP | 1 | GO:0006612 | BP | 1 | GO:0043215 | BP | 1 | GO:0006307 | BP | 1 |
| GO:0009398 | BP | 1 | GO:0006782 | BP | 1 | GO:0009442 | BP | 1 | GO:0006307 | BP | 1 | GO:0042256 | BP | 1 |
| GO:0045333 | BP | 1 | GO:0006235 | BP | 1 | GO:0009246 | BP | 1 | GO:0042256 | BP | 1 | GO:0019419 | BP | 1 |
| GO:0046081 | BP | 1 | GO:0006805 | BP | 1 | GO:0043215 | BP | 1 | GO:0019419 | BP | 1 | GO:0019628 | BP | 1 |
| GO:0034337 | BP | 1 | GO:0019877 | BP | 1 | GO:0006307 | BP | 1 | GO:0031119 | BP | 1 | GO:0031119 | BP | 1 |
| GO:0006474 | BP | 1 | GO:0006523 | BP | 1 | GO:0042256 | BP | 1 | GO:0097510 | BP | 1 | GO:0097510 | BP | 1 |
| GO:0046854 | BP | 1 | GO:0051290 | BP | 1 | GO:0019419 | BP | 1 | GO:0018153 | BP | 1 | GO:0018153 | BP | 1 |
| GO:0019674 | BP | 1 | GO:0009593 | BP | 1 | GO:0019628 | BP | 1 | GO:0006231 | BP | 1 | GO:0006231 | BP | 1 |
| GO:0033512 | BP | 1 | GO:0006612 | BP | 1 | GO:0031119 | BP | 1 | GO:0042158 | BP | 1 | GO:0042158 | BP | 1 |
| GO:0006164 | BP | 1 | GO:0009442 | BP | 1 | GO:0097510 | BP | 1 | GO:0016024 | BP | 1 | GO:0016024 | BP | 1 |
| GO:0042866 | BP | 1 | GO:0009246 | BP | 1 | GO:0018153 | BP | 1 | GO:0008610 | BP | 1 | GO:0008610 | BP | 1 |
| GO:0044205 | BP | 1 | GO:0043215 | BP | 1 | GO:0006231 | BP | 1 | GO:0015920 | BP | 1 | GO:0015920 | BP | 1 |
| GO:0042276 | BP | 1 | GO:0006307 | BP | 1 | GO:0042158 | BP | 1 | GO:0015937 | BP | 1 | GO:0015937 | BP | 1 |
| GO:0006048 | BP | 1 | GO:0042256 | BP | 1 | GO:0016024 | BP | 1 | GO:0042558 | BP | 1 | GO:0019676 | BP | 1 |
| GO:0009113 | BP | 1 | GO:0019419 | BP | 1 | GO:0008610 | BP | 1 | GO:0009447 | BP | 1 | GO:0042558 | BP | 1 |
| GO:0009263 | BP | 1 | GO:0019628 | BP | 1 | GO:0015920 | BP | 1 | GO:0006378 | BP | 1 | GO:0009447 | BP | 1 |
| GO:0044209 | BP | 1 | GO:0031119 | BP | 1 | GO:0015937 | BP | 1 | GO:0018012 | BP | 1 | GO:0006750 | BP | 1 |
| GO:0035442 | BP | 1 | GO:0097510 | BP | 1 | GO:0019676 | BP | 1 | GO:0006986 | BP | 1 | GO:0006378 | BP | 1 |
| GO:0006032 | BP | 1 | GO:0018153 | BP | 1 | GO:0042558 | BP | 1 | GO:0006431 | BP | 1 | GO:0018012 | BP | 1 |
| GO:0006419 | BP | 1 | GO:0006231 | BP | 1 | GO:0009447 | BP | 1 | GO:0000902 | BP | 1 | GO:0006986 | BP | 1 |
| GO:0050787 | BP | 1 | GO:0042158 | BP | 1 | GO:0055070 | BP | 1 | GO:0002097 | BP | 1 | GO:0006431 | BP | 1 |
| GO:0043488 | BP | 1 | GO:0016024 | BP | 1 | GO:0006378 | BP | 1 | GO:0009307 | BP | 1 | GO:0071286 | BP | 1 |
| GO:0036460 | BP | 1 | GO:0008610 | BP | 1 | GO:0018012 | BP | 1 | GO:0046685 | BP | 1 | GO:0000902 | BP | 1 |
| GO:2001039 | BP | 1 | GO:0015920 | BP | 1 | GO:0006986 | BP | 1 | GO:0019264 | BP | 1 | GO:0002097 | BP | 1 |
| GO:0006172 | BP | 1 | GO:0015937 | BP | 1 | GO:0006431 | BP | 1 | GO:0036265 | BP | 1 | GO:0009307 | BP | 1 |
| GO:0019985 | BP | 1 | GO:0019676 | BP | 1 | GO:0071286 | BP | 1 | GO:0002128 | BP | 1 | GO:0046685 | BP | 1 |
| GO:0018307 | BP | 1 | GO:0042558 | BP | 1 | GO:0000902 | BP | 1 | GO:0006636 | BP | 1 | GO:0019264 | BP | 1 |
| GO:0097175 | BP | 1 | GO:0009447 | BP | 1 | GO:0002097 | BP | 1 | GO:0046256 | BP | 1 | GO:0036265 | BP | 1 |
| GO:0001680 | BP | 1 | GO:0006750 | BP | 1 | GO:0009307 | BP | 1 | GO:0033362 | BP | 1 | GO:0002128 | BP | 1 |
| GO:0031439 | BP | 1 | GO:0055070 | BP | 1 | GO:0046685 | BP | 1 | GO:0031439 | BP | 1 | GO:0006636 | BP | 1 |
| GO:0019284 | BP | 1 | GO:0006378 | BP | 1 | GO:0019264 | BP | 1 | GO:0006542 | BP | 1 | GO:0046256 | BP | 1 |
| GO:0060702 | BP | 1 | GO:0018012 | BP | 1 | GO:0036265 | BP | 1 | GO:0042941 | BP | 1 | GO:0050821 | BP | 1 |
| GO:0006012 | BP | 1 | GO:0006986 | BP | 1 | GO:0002128 | BP | 1 | GO:1902600 | BP | 1 | GO:0015031 | BP | 1 |
| GO:0019835 | BP | 1 | GO:0006431 | BP | 1 | GO:0006636 | BP | 1 | GO:0070778 | BP | 1 | GO:0033362 | BP | 1 |
| GO:0015977 | BP | 1 | GO:0071286 | BP | 1 | GO:0033539 | BP | 1 | GO:0001125 | BP | 1 | GO:0031439 | BP | 1 |
| GO:0015817 | BP | 1 | GO:0000902 | BP | 1 | GO:0046256 | BP | 1 | GO:0042450 | BP | 1 | GO:0006542 | BP | 1 |
| GO:0006754 | BP | 1 | GO:0002097 | BP | 1 | GO:0050821 | BP | 1 | GO:2000144 | BP | 1 | GO:0042941 | BP | 1 |
| GO:0015740 | BP | 1 | GO:0009307 | BP | 1 | GO:0016114 | BP | 1 | GO:0006465 | BP | 1 | GO:1902600 | BP | 1 |
| GO:0045226 | BP | 1 | GO:0046685 | BP | 1 | GO:0015031 | BP | 1 | GO:0015851 | BP | 1 | GO:0070778 | BP | 1 |
| GO:0006972 | BP | 1 | GO:0019264 | BP | 1 | GO:0033362 | BP | 1 | GO:0006006 | BP | 1 | GO:0001125 | BP | 1 |
| GO:0019805 | BP | 1 | GO:0036265 | BP | 1 | GO:0031439 | BP | 1 | GO:0009063 | BP | 1 | GO:0042450 | BP | 1 |

|            |    |   |            |    |   |            |    |   |            |    |   |            |    |   |
|------------|----|---|------------|----|---|------------|----|---|------------|----|---|------------|----|---|
| GO:0006304 | BP | 1 | GO:0002128 | BP | 1 | GO:0006542 | BP | 1 | GO:0009411 | BP | 1 | GO:2000144 | BP | 1 |
| GO:0006422 | BP | 1 | GO:0006636 | BP | 1 | GO:0042941 | BP | 1 | GO:0006032 | BP | 1 | GO:0006465 | BP | 1 |
| GO:0036298 | BP | 1 | GO:0033539 | BP | 1 | GO:1902600 | BP | 1 | GO:0043420 | BP | 1 | GO:0018298 | BP | 1 |
| GO:0019264 | BP | 1 | GO:0046256 | BP | 1 | GO:0070778 | BP | 1 | GO:0016075 | BP | 1 | GO:0015851 | BP | 1 |
| GO:0048255 | BP | 1 | GO:0050821 | BP | 1 | GO:0001125 | BP | 1 | GO:0019627 | BP | 1 | GO:0009399 | BP | 1 |
| GO:0009691 | BP | 1 | GO:0016114 | BP | 1 | GO:0042450 | BP | 1 | GO:0006560 | BP | 1 | GO:0043952 | BP | 1 |
| GO:0006655 | BP | 1 | GO:0015031 | BP | 1 | GO:2000144 | BP | 1 | GO:0061504 | BP | 1 | GO:0006006 | BP | 1 |
| GO:0030643 | BP | 1 | GO:0033362 | BP | 1 | GO:0006465 | BP | 1 | GO:0000028 | BP | 1 | GO:0009063 | BP | 1 |
| GO:0006779 | BP | 1 | GO:0031439 | BP | 1 | GO:0018298 | BP | 1 | GO:0050992 | BP | 1 | GO:0009411 | BP | 1 |
| GO:0034355 | BP | 1 | GO:0006542 | BP | 1 | GO:0015851 | BP | 1 | GO:0015824 | BP | 1 | GO:0030490 | BP | 1 |
| GO:0019748 | BP | 1 | GO:0042941 | BP | 1 | GO:0009399 | BP | 1 | GO:0071915 | BP | 1 | GO:0002949 | BP | 1 |
| GO:0070297 | BP | 1 | GO:1902600 | BP | 1 | GO:0043952 | BP | 1 | GO:0006449 | BP | 1 | GO:0006032 | BP | 1 |
| GO:0046191 | BP | 1 | GO:0070778 | BP | 1 | GO:0043571 | BP | 1 | GO:0035556 | BP | 1 | GO:0043420 | BP | 1 |
| GO:0043419 | BP | 1 | GO:0001125 | BP | 1 | GO:0046279 | BP | 1 | GO:0030255 | BP | 1 | GO:0016075 | BP | 1 |
| GO:0006534 | BP | 1 | GO:0042450 | BP | 1 | GO:0006006 | BP | 1 | GO:0042174 | BP | 1 | GO:0051596 | BP | 1 |
| GO:0019605 | BP | 1 | GO:2000144 | BP | 1 | GO:0009063 | BP | 1 | GO:0006548 | BP | 1 | GO:0019627 | BP | 1 |
| GO:0006306 | BP | 1 | GO:0006465 | BP | 1 | GO:0009411 | BP | 1 | GO:0044208 | BP | 1 | GO:0006560 | BP | 1 |
| GO:0075713 | BP | 1 | GO:0018298 | BP | 1 | GO:0030490 | BP | 1 | GO:0071596 | BP | 1 | GO:0061504 | BP | 1 |
| GO:0032264 | BP | 1 | GO:0015851 | BP | 1 | GO:0002949 | BP | 1 | GO:0033022 | BP | 1 | GO:0000028 | BP | 1 |
| GO:0009396 | BP | 1 | GO:0009399 | BP | 1 | GO:0006032 | BP | 1 | GO:0070297 | BP | 1 | GO:0050992 | BP | 1 |
| GO:0101030 | BP | 1 | GO:0043952 | BP | 1 | GO:0043420 | BP | 1 | GO:0006777 | BP | 1 | GO:0015824 | BP | 1 |
| GO:0015920 | BP | 1 | GO:0043571 | BP | 1 | GO:0016075 | BP | 1 | GO:0036289 | BP | 1 | GO:0071915 | BP | 1 |
| GO:0010438 | BP | 1 | GO:0046279 | BP | 1 | GO:0051596 | BP | 1 | GO:0006486 | BP | 1 | GO:0006449 | BP | 1 |
| GO:0019299 | BP | 1 | GO:0006006 | BP | 1 | GO:0019627 | BP | 1 | GO:0006183 | BP | 1 | GO:0035556 | BP | 1 |
| GO:0045493 | BP | 1 | GO:0009063 | BP | 1 | GO:0006560 | BP | 1 | GO:0006207 | BP | 1 | GO:0030255 | BP | 1 |
| GO:0140114 | BP | 1 | GO:0009411 | BP | 1 | GO:0015740 | BP | 1 | GO:0006779 | BP | 1 | GO:0042174 | BP | 1 |
| GO:0006040 | BP | 1 | GO:0030490 | BP | 1 | GO:0061504 | BP | 1 | GO:0035672 | BP | 1 | GO:0006548 | BP | 1 |
| GO:0032265 | BP | 1 | GO:0002949 | BP | 1 | GO:0000028 | BP | 1 | GO:0031118 | BP | 1 | GO:0044208 | BP | 1 |
| GO:0019441 | BP | 1 | GO:0006032 | BP | 1 | GO:0050992 | BP | 1 | GO:0006995 | BP | 1 | GO:0071596 | BP | 1 |
| GO:0002128 | BP | 1 | GO:0043420 | BP | 1 | GO:0015824 | BP | 1 | GO:0019290 | BP | 1 | GO:0033022 | BP | 1 |
| GO:0006106 | BP | 1 | GO:0016075 | BP | 1 | GO:0071915 | BP | 1 | GO:0009451 | BP | 1 | GO:0070297 | BP | 1 |
| GO:0030655 | BP | 1 | GO:0051596 | BP | 1 | GO:0006449 | BP | 1 | GO:0006098 | BP | 1 | GO:0006777 | BP | 1 |
| GO:1900377 | BP | 1 | GO:0019627 | BP | 1 | GO:0035556 | BP | 1 | GO:0015813 | BP | 1 | GO:0036289 | BP | 1 |
| GO:0006420 | BP | 1 | GO:0006560 | BP | 1 | GO:0030255 | BP | 1 | GO:0009312 | BP | 1 | GO:0070415 | BP | 1 |
| GO:0006436 | BP | 1 | GO:0015740 | BP | 1 | GO:1901381 | BP | 1 | GO:0032265 | BP | 1 | GO:0006486 | BP | 1 |
| GO:2000142 | BP | 1 | GO:0061504 | BP | 1 | GO:0042174 | BP | 1 | GO:0098732 | BP | 1 | GO:0006183 | BP | 1 |
| GO:0015941 | BP | 1 | GO:0000028 | BP | 1 | GO:0006548 | BP | 1 | GO:0090549 | BP | 1 | GO:0006207 | BP | 1 |
| GO:0015803 | BP | 1 | GO:0050992 | BP | 1 | GO:0044208 | BP | 1 | GO:0051409 | BP | 1 | GO:0031388 | BP | 1 |
| GO:0009168 | BP | 1 | GO:0015824 | BP | 1 | GO:0071596 | BP | 1 | GO:0042823 | BP | 1 | GO:0006779 | BP | 1 |
| GO:0045900 | BP | 1 | GO:0071915 | BP | 1 | GO:0033022 | BP | 1 | GO:0009403 | BP | 1 | GO:0035672 | BP | 1 |
| GO:0009099 | BP | 1 | GO:0006449 | BP | 1 | GO:0070297 | BP | 1 | GO:0015949 | BP | 1 | GO:0006085 | BP | 1 |
| GO:0006183 | BP | 1 | GO:0035556 | BP | 1 | GO:0006777 | BP | 1 | GO:0042938 | BP | 1 | GO:0031118 | BP | 1 |
| GO:0006449 | BP | 1 | GO:0030255 | BP | 1 | GO:0036289 | BP | 1 | GO:0015817 | BP | 1 | GO:0006995 | BP | 1 |
| GO:0006281 | BP | 1 | GO:1901381 | BP | 1 | GO:0070415 | BP | 1 | GO:0009168 | BP | 1 | GO:0019290 | BP | 1 |
| GO:0033528 | BP | 1 | GO:0042174 | BP | 1 | GO:0006486 | BP | 1 | GO:0009082 | BP | 1 | GO:0009451 | BP | 1 |

|            |    |   |            |    |   |            |    |   |            |    |   |            |    |   |
|------------|----|---|------------|----|---|------------|----|---|------------|----|---|------------|----|---|
| GO:0006011 | BP | 1 | GO:0006548 | BP | 1 | GO:0006183 | BP | 1 | GO:0006754 | BP | 1 | GO:0006098 | BP | 1 |
| GO:0051409 | BP | 1 | GO:0044208 | BP | 1 | GO:0006207 | BP | 1 | GO:0009146 | BP | 1 | GO:0015813 | BP | 1 |
| GO:0030261 | BP | 1 | GO:0071596 | BP | 1 | GO:0031388 | BP | 1 | GO:0015724 | BP | 1 | GO:0009312 | BP | 1 |
| GO:0019632 | BP | 1 | GO:0033022 | BP | 1 | GO:0006779 | BP | 1 | GO:0035442 | BP | 1 | GO:0032265 | BP | 1 |
| GO:0019700 | BP | 1 | GO:0070297 | BP | 1 | GO:0035672 | BP | 1 | GO:0032049 | BP | 1 | GO:0006352 | BP | 1 |
| GO:0001682 | BP | 1 | GO:0006777 | BP | 1 | GO:0006085 | BP | 1 | GO:0015074 | BP | 1 | GO:0098732 | BP | 1 |
| GO:1901106 | BP | 1 | GO:0036289 | BP | 1 | GO:0031118 | BP | 1 | GO:0042255 | BP | 1 | GO:0006072 | BP | 1 |
| GO:0016485 | BP | 1 | GO:0070415 | BP | 1 | GO:0006995 | BP | 1 | GO:0010312 | BP | 1 | GO:0090549 | BP | 1 |
| GO:0006428 | BP | 1 | GO:0006486 | BP | 1 | GO:0019290 | BP | 1 | GO:0033512 | BP | 1 | GO:0051409 | BP | 1 |
| GO:0006139 | BP | 1 | GO:0006183 | BP | 1 | GO:0009451 | BP | 1 | GO:0006040 | BP | 1 | GO:0042823 | BP | 1 |
| GO:0009651 | BP | 1 | GO:0006207 | BP | 1 | GO:0006098 | BP | 1 | GO:0044238 | BP | 1 | GO:0009403 | BP | 1 |
| GO:0030259 | BP | 1 | GO:0031388 | BP | 1 | GO:0015813 | BP | 1 | GO:0075713 | BP | 1 | GO:0015949 | BP | 1 |
| GO:0071268 | BP | 1 | GO:0006779 | BP | 1 | GO:0009312 | BP | 1 | GO:1902201 | BP | 1 | GO:0042938 | BP | 1 |
| GO:0009072 | BP | 1 | GO:0035672 | BP | 1 | GO:0032265 | BP | 1 | GO:0018023 | BP | 1 | GO:0015817 | BP | 1 |
| GO:0048870 | BP | 1 | GO:0006085 | BP | 1 | GO:0006352 | BP | 1 | GO:0006282 | BP | 1 | GO:0009168 | BP | 1 |
| GO:0042906 | BP | 1 | GO:0031118 | BP | 1 | GO:0098732 | BP | 1 | GO:0019292 | BP | 1 | GO:0009082 | BP | 1 |
| GO:0035556 | BP | 1 | GO:0006995 | BP | 1 | GO:0006072 | BP | 1 | GO:0009395 | BP | 1 | GO:0006223 | BP | 1 |
| GO:0009190 | BP | 1 | GO:0019290 | BP | 1 | GO:0090549 | BP | 1 | GO:0042203 | BP | 1 | GO:0006754 | BP | 1 |
| GO:0016260 | BP | 1 | GO:0009451 | BP | 1 | GO:0051409 | BP | 1 | GO:0018193 | BP | 1 | GO:0009146 | BP | 1 |
| GO:0033362 | BP | 1 | GO:0006098 | BP | 1 | GO:0042823 | BP | 1 | GO:0015977 | BP | 1 | GO:0015724 | BP | 1 |
| GO:0006548 | BP | 1 | GO:0015813 | BP | 1 | GO:0009403 | BP | 1 | GO:0097056 | BP | 1 | GO:0006108 | BP | 1 |
| GO:2000186 | BP | 1 | GO:0009312 | BP | 1 | GO:0015949 | BP | 1 | GO:0046167 | BP | 1 | GO:0035442 | BP | 1 |
| GO:0045948 | BP | 1 | GO:0032265 | BP | 1 | GO:0042938 | BP | 1 | GO:0019614 | BP | 1 | GO:0006646 | BP | 1 |
| GO:0046653 | BP | 1 | GO:0006352 | BP | 1 | GO:0015817 | BP | 1 | GO:0072323 | BP | 1 | GO:0032049 | BP | 1 |
| GO:0042885 | BP | 1 | GO:0098732 | BP | 1 | GO:0009168 | BP | 1 | GO:0046855 | BP | 1 | GO:0042255 | BP | 1 |
| GO:1903424 | BP | 1 | GO:0006072 | BP | 1 | GO:0009082 | BP | 1 | GO:0032324 | BP | 1 | GO:0010312 | BP | 1 |
| GO:2000766 | BP | 1 | GO:0090549 | BP | 1 | GO:0006223 | BP | 1 | GO:0050787 | BP | 1 | GO:0033512 | BP | 1 |
| GO:0009143 | BP | 1 | GO:0051409 | BP | 1 | GO:0019288 | BP | 1 | GO:0071476 | BP | 1 | GO:0001522 | BP | 1 |
| GO:0010133 | BP | 1 | GO:0042823 | BP | 1 | GO:0017001 | BP | 1 | GO:0015970 | BP | 1 | GO:0006270 | BP | 1 |
| GO:0019394 | BP | 1 | GO:0009403 | BP | 1 | GO:0006754 | BP | 1 | GO:0010133 | BP | 1 | GO:0006040 | BP | 1 |
| GO:0045719 | BP | 1 | GO:0042773 | BP | 1 | GO:0009146 | BP | 1 | GO:0019270 | BP | 1 | GO:0044238 | BP | 1 |
| GO:0032297 | BP | 1 | GO:0015949 | BP | 1 | GO:0015724 | BP | 1 | GO:0032264 | BP | 1 | GO:1902201 | BP | 1 |
| GO:0006399 | BP | 1 | GO:0042938 | BP | 1 | GO:0006108 | BP | 1 | GO:0006637 | BP | 1 | GO:0018023 | BP | 1 |
| GO:0016539 | BP | 1 | GO:0015817 | BP | 1 | GO:0006878 | BP | 1 | GO:0015967 | BP | 1 | GO:0015889 | BP | 1 |
| GO:0016051 | BP | 1 | GO:0009168 | BP | 1 | GO:0035442 | BP | 1 | GO:0006434 | BP | 1 | GO:0006282 | BP | 1 |
| GO:0032324 | BP | 1 | GO:0009082 | BP | 1 | GO:0006646 | BP | 1 | GO:0009113 | BP | 1 | GO:0006520 | BP | 1 |
| GO:0001666 | BP | 1 | GO:0006223 | BP | 1 | GO:0032049 | BP | 1 | GO:0016260 | BP | 1 | GO:0019292 | BP | 1 |
| GO:0008104 | BP | 1 | GO:0019288 | BP | 1 | GO:0042255 | BP | 1 | GO:0018307 | BP | 1 | GO:0009395 | BP | 1 |
| GO:0007062 | BP | 1 | GO:0017001 | BP | 1 | GO:0010312 | BP | 1 | GO:0034401 | BP | 1 | GO:0042203 | BP | 1 |
| GO:0006564 | BP | 1 | GO:0006754 | BP | 1 | GO:0033512 | BP | 1 | GO:0051262 | BP | 1 | GO:0018193 | BP | 1 |
| GO:0089705 | BP | 1 | GO:0009146 | BP | 1 | GO:0001522 | BP | 1 | GO:0065003 | BP | 1 | GO:0015977 | BP | 1 |
| GO:0009156 | BP | 1 | GO:0015724 | BP | 1 | GO:0006040 | BP | 1 | GO:1903401 | BP | 1 | GO:0097056 | BP | 1 |
| GO:0000256 | BP | 1 | GO:0006108 | BP | 1 | GO:0044238 | BP | 1 | GO:0006605 | BP | 1 | GO:0046167 | BP | 1 |
| GO:0010628 | BP | 1 | GO:0006878 | BP | 1 | GO:0075713 | BP | 1 | GO:0042355 | BP | 1 | GO:0019614 | BP | 1 |
| GO:1902600 | BP | 1 | GO:0035442 | BP | 1 | GO:0019344 | BP | 1 | GO:0043709 | BP | 1 | GO:0072323 | BP | 1 |

|            |    |   |            |    |   |            |    |   |            |    |   |            |    |   |
|------------|----|---|------------|----|---|------------|----|---|------------|----|---|------------|----|---|
| GO:0036506 | BP | 1 | GO:0006646 | BP | 1 | GO:1902201 | BP | 1 | GO:1901135 | BP | 1 | GO:0046855 | BP | 1 |
| GO:0009103 | BP | 1 | GO:0032049 | BP | 1 | GO:0018023 | BP | 1 | GO:0042245 | BP | 1 | GO:0032324 | BP | 1 |
| GO:0006208 | BP | 1 | GO:0042255 | BP | 1 | GO:0015889 | BP | 1 | GO:0035600 | BP | 1 | GO:0001896 | BP | 1 |
| GO:0044208 | BP | 1 | GO:0010312 | BP | 1 | GO:0006282 | BP | 1 | GO:0019629 | BP | 1 | GO:0050787 | BP | 1 |
| GO:0009094 | BP | 1 | GO:0033512 | BP | 1 | GO:0006520 | BP | 1 | GO:0006650 | BP | 1 | GO:0071476 | BP | 1 |
| GO:0080111 | BP | 1 | GO:0001522 | BP | 1 | GO:0019292 | BP | 1 | GO:0098719 | BP | 1 | GO:0015970 | BP | 1 |
| GO:0009249 | BP | 1 | GO:0006270 | BP | 1 | GO:0009395 | BP | 1 | GO:0006438 | BP | 1 | GO:0010133 | BP | 1 |
| GO:0006788 | BP | 1 | GO:0006040 | BP | 1 | GO:0042203 | BP | 1 | GO:0009165 | BP | 1 | GO:0019270 | BP | 1 |
| GO:0006083 | BP | 1 | GO:0044238 | BP | 1 | GO:0018193 | BP | 1 | GO:0046110 | BP | 1 | GO:0019346 | BP | 1 |
| GO:0042558 | BP | 1 | GO:0075713 | BP | 1 | GO:0015977 | BP | 1 | GO:0072344 | BP | 1 | GO:0032264 | BP | 1 |
| GO:0098655 | BP | 1 | GO:0019344 | BP | 1 | GO:0097056 | BP | 1 | GO:0071277 | BP | 1 | GO:0006637 | BP | 1 |
| GO:0019540 | BP | 1 | GO:1902201 | BP | 1 | GO:0046167 | BP | 1 | GO:0006430 | BP | 1 | GO:0015967 | BP | 1 |
| GO:0006429 | BP | 1 | GO:0018023 | BP | 1 | GO:0019614 | BP | 1 | GO:0033468 | BP | 1 | GO:0006434 | BP | 1 |
| GO:0019354 | BP | 1 | GO:0015889 | BP | 1 | GO:0022900 | BP | 1 | GO:0015976 | BP | 1 | GO:0009113 | BP | 1 |
| GO:0015951 | BP | 1 | GO:0006282 | BP | 1 | GO:0072323 | BP | 1 | GO:0006532 | BP | 1 | GO:0016260 | BP | 1 |
| GO:0006547 | BP | 1 | GO:0006520 | BP | 1 | GO:0046855 | BP | 1 | GO:0033567 | BP | 1 | GO:0018307 | BP | 1 |
| GO:0000967 | BP | 1 | GO:0019292 | BP | 1 | GO:0032324 | BP | 1 | GO:0009190 | BP | 1 | GO:0015833 | BP | 1 |
| GO:0019294 | BP | 1 | GO:0009395 | BP | 1 | GO:0001896 | BP | 1 | GO:0009970 | BP | 1 | GO:0034401 | BP | 1 |
| GO:0006221 | BP | 1 | GO:0042203 | BP | 1 | GO:0050787 | BP | 1 | GO:0032259 | BP | 1 | GO:0051262 | BP | 1 |
| GO:0033252 | BP | 1 | GO:0018193 | BP | 1 | GO:0071476 | BP | 1 | GO:0006464 | BP | 1 | GO:0009416 | BP | 1 |
| GO:0009312 | BP | 1 | GO:0015977 | BP | 1 | GO:0015970 | BP | 1 | GO:0006458 | BP | 1 | GO:0065003 | BP | 1 |
| GO:0000723 | BP | 1 | GO:0097056 | BP | 1 | GO:0010133 | BP | 1 | GO:0071294 | BP | 1 | GO:1903401 | BP | 1 |
| GO:0009306 | BP | 1 | GO:0046167 | BP | 1 | GO:0019270 | BP | 1 | GO:0002099 | BP | 1 | GO:0006605 | BP | 1 |
| GO:0032978 | BP | 1 | GO:0019614 | BP | 1 | GO:0019346 | BP | 1 | GO:0034470 | BP | 1 | GO:0042355 | BP | 1 |
| GO:0001123 | BP | 1 | GO:0022900 | BP | 1 | GO:0032264 | BP | 1 | GO:0043708 | BP | 1 | GO:0043709 | BP | 1 |
| GO:0046295 | BP | 1 | GO:0072323 | BP | 1 | GO:0006637 | BP | 1 | GO:1901023 | BP | 1 | GO:0044206 | BP | 1 |
| GO:0015774 | BP | 1 | GO:0046855 | BP | 1 | GO:0015967 | BP | 1 | GO:0006567 | BP | 1 | GO:1901135 | BP | 1 |
| GO:0052163 | BP | 1 | GO:0032324 | BP | 1 | GO:0006434 | BP | 1 | GO:0015847 | BP | 1 | GO:0042245 | BP | 1 |
| GO:0006636 | BP | 1 | GO:0001896 | BP | 1 | GO:0009113 | BP | 1 | GO:0060702 | BP | 1 | GO:0035600 | BP | 1 |
| GO:0006388 | BP | 1 | GO:0050787 | BP | 1 | GO:0016260 | BP | 1 | GO:0018160 | BP | 1 | GO:0001407 | BP | 1 |
| GO:0090071 | BP | 1 | GO:0051518 | BP | 1 | GO:0018307 | BP | 1 | GO:1900705 | BP | 1 | GO:0019629 | BP | 1 |
| GO:0015701 | BP | 1 | GO:0071476 | BP | 1 | GO:0015833 | BP | 1 | GO:0006616 | BP | 1 | GO:0043213 | BP | 1 |
| GO:0032049 | BP | 1 | GO:0015970 | BP | 1 | GO:0034401 | BP | 1 | GO:0046191 | BP | 1 | GO:0016226 | BP | 1 |
| GO:0015710 | BP | 1 | GO:0010133 | BP | 1 | GO:0051262 | BP | 1 | GO:0046470 | BP | 1 | GO:0006650 | BP | 1 |
| GO:0071766 | BP | 1 | GO:0019270 | BP | 1 | GO:0009416 | BP | 1 | GO:0009992 | BP | 1 | GO:0098719 | BP | 1 |
| GO:0070930 | BP | 1 | GO:0019346 | BP | 1 | GO:0065003 | BP | 1 | GO:1900753 | BP | 1 | GO:0006438 | BP | 1 |
| GO:0009052 | BP | 1 | GO:0071555 | BP | 1 | GO:1903401 | BP | 1 | GO:0043108 | BP | 1 | GO:0009165 | BP | 1 |
| GO:0043103 | BP | 1 | GO:0032264 | BP | 1 | GO:0006605 | BP | 1 | GO:0006526 | BP | 1 | GO:0009409 | BP | 1 |
| GO:0042158 | BP | 1 | GO:0006637 | BP | 1 | GO:0042355 | BP | 1 | GO:0031670 | BP | 1 | GO:0046110 | BP | 1 |
| GO:0033223 | BP | 1 | GO:0015967 | BP | 1 | GO:0045454 | BP | 1 | GO:0006084 | BP | 1 | GO:0072344 | BP | 1 |
| GO:0006783 | BP | 1 | GO:0006434 | BP | 1 | GO:0043709 | BP | 1 | GO:0006783 | BP | 1 | GO:0042254 | BP | 1 |
| GO:0120010 | BP | 1 | GO:0009113 | BP | 1 | GO:0044206 | BP | 1 | GO:0006729 | BP | 1 | GO:0071277 | BP | 1 |
| GO:0098732 | BP | 1 | GO:0016260 | BP | 1 | GO:1901135 | BP | 1 | GO:0043335 | BP | 1 | GO:0005992 | BP | 1 |
| GO:0006323 | BP | 1 | GO:0018307 | BP | 1 | GO:0006527 | BP | 1 | GO:0006474 | BP | 1 | GO:0006430 | BP | 1 |
| GO:0006090 | BP | 1 | GO:0015833 | BP | 1 | GO:0042245 | BP | 1 | GO:0042742 | BP | 1 | GO:0019605 | BP | 1 |

|            |    |   |            |    |   |            |    |   |            |    |   |            |    |   |
|------------|----|---|------------|----|---|------------|----|---|------------|----|---|------------|----|---|
| GO:0009146 | BP | 1 | GO:0034401 | BP | 1 | GO:0035600 | BP | 1 | GO:0009396 | BP | 1 | GO:0006814 | BP | 1 |
| GO:0019277 | BP | 1 | GO:0051262 | BP | 1 | GO:0001407 | BP | 1 | GO:0009094 | BP | 1 | GO:0008156 | BP | 1 |
| GO:0050992 | BP | 1 | GO:0009416 | BP | 1 | GO:0019629 | BP | 1 | GO:0046296 | BP | 1 | GO:0033468 | BP | 1 |
| GO:0006146 | BP | 1 | GO:0065003 | BP | 1 | GO:0043213 | BP | 1 | GO:0015808 | BP | 1 | GO:0015976 | BP | 1 |
| GO:0070207 | BP | 1 | GO:1903401 | BP | 1 | GO:0016226 | BP | 1 | GO:0009448 | BP | 1 | GO:0006532 | BP | 1 |
| GO:0044238 | BP | 1 | GO:0006605 | BP | 1 | GO:0006650 | BP | 1 | GO:0033223 | BP | 1 | GO:0009423 | BP | 1 |
| GO:0006434 | BP | 1 | GO:0042355 | BP | 1 | GO:0098719 | BP | 1 | GO:0070929 | BP | 1 | GO:0033567 | BP | 1 |
| GO:0097428 | BP | 1 | GO:0045454 | BP | 1 | GO:0006438 | BP | 1 | GO:0045936 | BP | 1 | GO:0009164 | BP | 1 |
| GO:0002131 | BP | 1 | GO:0043709 | BP | 1 | GO:0009165 | BP | 1 | GO:0051983 | BP | 1 | GO:0009190 | BP | 1 |
| GO:0006147 | BP | 1 | GO:0044206 | BP | 1 | GO:0009409 | BP | 1 | GO:0001682 | BP | 1 | GO:0009970 | BP | 1 |
| GO:0071467 | BP | 1 | GO:1901135 | BP | 1 | GO:0046110 | BP | 1 | GO:0006426 | BP | 1 | GO:0006464 | BP | 1 |
| GO:0051262 | BP | 1 | GO:0006527 | BP | 1 | GO:0072344 | BP | 1 | GO:0035971 | BP | 1 | GO:0046294 | BP | 1 |
| GO:0070929 | BP | 1 | GO:0042245 | BP | 1 | GO:0042254 | BP | 1 | GO:0090609 | BP | 1 | GO:0006458 | BP | 1 |
| GO:0016998 | BP | 1 | GO:0035600 | BP | 1 | GO:0071277 | BP | 1 | GO:0036460 | BP | 1 | GO:0071294 | BP | 1 |
| GO:0006560 | BP | 1 | GO:0001407 | BP | 1 | GO:0005992 | BP | 1 | GO:0042885 | BP | 1 | GO:0002099 | BP | 1 |
| GO:0006084 | BP | 1 | GO:0019629 | BP | 1 | GO:0006430 | BP | 1 | GO:0006220 | BP | 1 | GO:0034470 | BP | 1 |
| GO:0070894 | BP | 1 | GO:0043213 | BP | 1 | GO:0019605 | BP | 1 | GO:0030259 | BP | 1 | GO:0009253 | BP | 1 |
| GO:0006654 | BP | 1 | GO:0016226 | BP | 1 | GO:0015828 | BP | 1 | GO:0006972 | BP | 1 | GO:0043708 | BP | 1 |
| GO:0002132 | BP | 1 | GO:0006650 | BP | 1 | GO:0006814 | BP | 1 | GO:0019394 | BP | 1 | GO:0006470 | BP | 1 |
| GO:0042780 | BP | 1 | GO:0098719 | BP | 1 | GO:0033468 | BP | 1 | GO:0034775 | BP | 1 | GO:1901023 | BP | 1 |
| GO:0019419 | BP | 1 | GO:0006438 | BP | 1 | GO:0015976 | BP | 1 | GO:1900377 | BP | 1 | GO:0006525 | BP | 1 |
| GO:1900376 | BP | 1 | GO:0009165 | BP | 1 | GO:0006532 | BP | 1 | GO:0090347 | BP | 1 | GO:0006567 | BP | 1 |
| GO:0043108 | BP | 1 | GO:0009409 | BP | 1 | GO:0032885 | BP | 1 | GO:0019428 | BP | 1 | GO:0030261 | BP | 1 |
| GO:0009585 | BP | 1 | GO:0046110 | BP | 1 | GO:0009423 | BP | 1 | GO:0043488 | BP | 1 | GO:0015847 | BP | 1 |
| GO:0006523 | BP | 1 | GO:0072344 | BP | 1 | GO:0033567 | BP | 1 | GO:0019427 | BP | 1 | GO:0006730 | BP | 1 |
| GO:0019420 | BP | 1 | GO:0042254 | BP | 1 | GO:0009190 | BP | 1 | GO:0046295 | BP | 1 | GO:0060702 | BP | 1 |
| GO:0006555 | BP | 1 | GO:0071277 | BP | 1 | GO:0009970 | BP | 1 | GO:0070475 | BP | 1 | GO:0018160 | BP | 1 |
| GO:0035672 | BP | 1 | GO:0005992 | BP | 1 | GO:0032259 | BP | 1 | GO:0000731 | BP | 1 | GO:0009097 | BP | 1 |
| GO:0019740 | BP | 1 | GO:0006430 | BP | 1 | GO:0006464 | BP | 1 | GO:0042866 | BP | 1 | GO:1900705 | BP | 1 |
| GO:0042245 | BP | 1 | GO:0019605 | BP | 1 | GO:0046294 | BP | 1 | GO:0000462 | BP | 1 | GO:0006616 | BP | 1 |
| GO:0006612 | BP | 1 | GO:0006814 | BP | 1 | GO:0006097 | BP | 1 | GO:0019674 | BP | 1 | GO:0046191 | BP | 1 |
| GO:0006780 | BP | 1 | GO:0008156 | BP | 1 | GO:0015685 | BP | 1 | GO:0046417 | BP | 1 | GO:0010332 | BP | 1 |
| GO:0019627 | BP | 1 | GO:0033468 | BP | 1 | GO:0006458 | BP | 1 | GO:0009099 | BP | 1 | GO:0023014 | BP | 1 |
| GO:0015693 | BP | 1 | GO:0015976 | BP | 1 | GO:0071294 | BP | 1 | GO:0052163 | BP | 1 | GO:0046470 | BP | 1 |
| GO:0010243 | BP | 1 | GO:0006532 | BP | 1 | GO:0002099 | BP | 1 | GO:0003333 | BP | 1 | GO:0009297 | BP | 1 |
| GO:0006464 | BP | 1 | GO:0032885 | BP | 1 | GO:0034470 | BP | 1 | GO:0009436 | BP | 1 | GO:0009992 | BP | 1 |
| GO:0018193 | BP | 1 | GO:0009423 | BP | 1 | GO:0009253 | BP | 1 | GO:0045848 | BP | 1 | GO:1900753 | BP | 1 |
| GO:0009593 | BP | 1 | GO:0033567 | BP | 1 | GO:0043708 | BP | 1 | GO:0033389 | BP | 1 | GO:0006065 | BP | 1 |
| GO:0071224 | BP | 1 | GO:0009164 | BP | 1 | GO:0006470 | BP | 1 | GO:0050779 | BP | 1 | GO:0043108 | BP | 1 |
| GO:0009877 | BP | 1 | GO:0009190 | BP | 1 | GO:0051607 | BP | 1 | GO:0006598 | BP | 1 | GO:0017038 | BP | 1 |
| GO:0072321 | BP | 1 | GO:0009970 | BP | 1 | GO:1901023 | BP | 1 | GO:0034219 | BP | 1 | GO:0031670 | BP | 1 |
| GO:0044873 | BP | 1 | GO:0032259 | BP | 1 | GO:0006525 | BP | 1 | GO:0045493 | BP | 1 | GO:0006084 | BP | 1 |
| GO:0030641 | BP | 1 | GO:0006464 | BP | 1 | GO:0006567 | BP | 1 | GO:0042743 | BP | 1 | GO:0051096 | BP | 1 |
| GO:0006427 | BP | 1 | GO:0046294 | BP | 1 | GO:0030261 | BP | 1 | GO:0046081 | BP | 1 | GO:0006783 | BP | 1 |
| GO:0009403 | BP | 1 | GO:0006097 | BP | 1 | GO:0015847 | BP | 1 | GO:0015951 | BP | 1 | GO:0006729 | BP | 1 |

|            |    |   |            |    |   |            |    |   |            |    |   |            |    |   |
|------------|----|---|------------|----|---|------------|----|---|------------|----|---|------------|----|---|
| GO:0033228 | BP | 1 | GO:0015685 | BP | 1 | GO:0060702 | BP | 1 | GO:0015818 | BP | 1 | GO:0006081 | BP | 1 |
| GO:0043107 | BP | 1 | GO:0006458 | BP | 1 | GO:0018160 | BP | 1 | GO:0006147 | BP | 1 | GO:0043335 | BP | 1 |
| GO:0046336 | BP | 1 | GO:0071294 | BP | 1 | GO:0009097 | BP | 1 | GO:0009437 | BP | 1 | GO:0006474 | BP | 1 |
| GO:0019752 | BP | 1 | GO:0002099 | BP | 1 | GO:1900705 | BP | 1 | GO:0006747 | BP | 1 | GO:0042742 | BP | 1 |
| GO:0046110 | BP | 1 | GO:0034470 | BP | 1 | GO:0006616 | BP | 1 | GO:0015822 | BP | 1 | GO:0009396 | BP | 1 |
| GO:0006203 | BP | 1 | GO:0009253 | BP | 1 | GO:0046191 | BP | 1 | GO:0006069 | BP | 1 | GO:0009094 | BP | 1 |
| GO:0006424 | BP | 1 | GO:0043708 | BP | 1 | GO:0009058 | BP | 1 | GO:0006413 | BP | 1 | GO:0046296 | BP | 1 |
| GO:0006829 | BP | 1 | GO:0006470 | BP | 1 | GO:0010332 | BP | 1 | GO:0008104 | BP | 1 | GO:0015808 | BP | 1 |
| GO:0017013 | BP | 1 | GO:0051607 | BP | 1 | GO:0023014 | BP | 1 | GO:0031564 | BP | 1 | GO:0009448 | BP | 1 |
| GO:0006109 | BP | 1 | GO:1901023 | BP | 1 | GO:0046470 | BP | 1 | GO:0044097 | BP | 1 | GO:0019480 | BP | 1 |
| GO:0015818 | BP | 1 | GO:0006525 | BP | 1 | GO:0009297 | BP | 1 | GO:0031668 | BP | 1 | GO:0006298 | BP | 1 |
| GO:0051271 | BP | 1 | GO:0006567 | BP | 1 | GO:0009992 | BP | 1 | GO:0006518 | BP | 1 | GO:0033223 | BP | 1 |
| GO:0009395 | BP | 1 | GO:0030261 | BP | 1 | GO:1900753 | BP | 1 | GO:0051259 | BP | 1 | GO:0070929 | BP | 1 |
| GO:0034219 | BP | 1 | GO:0015847 | BP | 1 | GO:0009401 | BP | 1 | GO:0006808 | BP | 1 | GO:0045936 | BP | 1 |
| GO:1902023 | BP | 1 | GO:0006730 | BP | 1 | GO:0006065 | BP | 1 | GO:0070417 | BP | 1 | GO:0051983 | BP | 1 |
| GO:0043683 | BP | 1 | GO:0060702 | BP | 1 | GO:0043108 | BP | 1 | GO:0015853 | BP | 1 | GO:0001682 | BP | 1 |
| GO:0006431 | BP | 1 | GO:0018160 | BP | 1 | GO:0006526 | BP | 1 | GO:0071470 | BP | 1 | GO:0006426 | BP | 1 |
| GO:0006401 | BP | 1 | GO:0009097 | BP | 1 | GO:0017038 | BP | 1 | GO:0090529 | BP | 1 | GO:0044119 | BP | 1 |
| GO:0071596 | BP | 1 | GO:1900705 | BP | 1 | GO:0006281 | BP | 1 | GO:0032781 | BP | 1 | GO:0033477 | BP | 1 |
| GO:0006145 | BP | 1 | GO:0006616 | BP | 1 | GO:0031670 | BP | 1 | GO:0009249 | BP | 1 | GO:0035971 | BP | 1 |
| GO:0032508 | BP | 1 | GO:0046191 | BP | 1 | GO:0006084 | BP | 1 | GO:0035998 | BP | 1 | GO:0090609 | BP | 1 |
| GO:0018023 | BP | 1 | GO:0009058 | BP | 1 | GO:0051096 | BP | 1 | GO:0051085 | BP | 1 | GO:0036460 | BP | 1 |
| GO:0006426 | BP | 1 | GO:0010332 | BP | 1 | GO:0006783 | BP | 1 | GO:0006422 | BP | 1 | GO:0042885 | BP | 1 |
| GO:1901565 | BP | 1 | GO:0023014 | BP | 1 | GO:0006729 | BP | 1 | GO:0018339 | BP | 1 | GO:0006220 | BP | 1 |
| GO:0030001 | BP | 1 | GO:0046470 | BP | 1 | GO:0006081 | BP | 1 | GO:0032150 | BP | 1 | GO:0030259 | BP | 1 |
| GO:0019570 | BP | 1 | GO:0009297 | BP | 1 | GO:0043335 | BP | 1 | GO:0006203 | BP | 1 | GO:0015628 | BP | 1 |
| GO:0006307 | BP | 1 | GO:0009992 | BP | 1 | GO:0007155 | BP | 1 | GO:0044210 | BP | 1 | GO:0006972 | BP | 1 |
| GO:0030152 | BP | 1 | GO:1900753 | BP | 1 | GO:0006474 | BP | 1 | GO:0009231 | BP | 1 | GO:0019394 | BP | 1 |
| GO:0097056 | BP | 1 | GO:0009401 | BP | 1 | GO:0042742 | BP | 1 | GO:0006012 | BP | 1 | GO:0009585 | BP | 1 |
| GO:0006015 | BP | 1 | GO:0006065 | BP | 1 | GO:0009396 | BP | 1 | GO:1902564 | BP | 1 | GO:0034775 | BP | 1 |
| GO:0042256 | BP | 1 | GO:0043108 | BP | 1 | GO:0006435 | BP | 1 | GO:0006388 | BP | 1 | GO:1900377 | BP | 1 |
| GO:0034983 | BP | 1 | GO:0006526 | BP | 1 | GO:0009094 | BP | 1 | GO:0019679 | BP | 1 | GO:0090347 | BP | 1 |
| GO:0030638 | BP | 1 | GO:0017038 | BP | 1 | GO:0046296 | BP | 1 | GO:0043683 | BP | 1 | GO:0019428 | BP | 1 |
| GO:0006646 | BP | 1 | GO:0006281 | BP | 1 | GO:0015808 | BP | 1 | GO:0052164 | BP | 1 | GO:0043488 | BP | 1 |
| GO:0035429 | BP | 1 | GO:0031670 | BP | 1 | GO:0009448 | BP | 1 | GO:0045717 | BP | 1 | GO:0019427 | BP | 1 |
| GO:0002097 | BP | 1 | GO:0006084 | BP | 1 | GO:0019480 | BP | 1 | GO:0034355 | BP | 1 | GO:0008033 | BP | 1 |
| GO:0009435 | BP | 1 | GO:0051096 | BP | 1 | GO:0006298 | BP | 1 | GO:0034656 | BP | 1 | GO:0046295 | BP | 1 |
| GO:0008300 | BP | 1 | GO:0006783 | BP | 1 | GO:0033223 | BP | 1 | GO:0006233 | BP | 1 | GO:0070475 | BP | 1 |
| GO:0051983 | BP | 1 | GO:0006729 | BP | 1 | GO:0007231 | BP | 1 | GO:1901565 | BP | 1 | GO:0000271 | BP | 1 |
| GO:0009225 | BP | 1 | GO:0006081 | BP | 1 | GO:0006265 | BP | 1 | GO:0042594 | BP | 1 | GO:0000731 | BP | 1 |
| GO:0006796 | BP | 1 | GO:0043335 | BP | 1 | GO:0070929 | BP | 1 | GO:0015879 | BP | 1 | GO:0042866 | BP | 1 |
| GO:1900705 | BP | 1 | GO:0007155 | BP | 1 | GO:0045936 | BP | 1 | GO:0006427 | BP | 1 | GO:0000462 | BP | 1 |
| GO:0000103 | BP | 1 | GO:0006260 | BP | 1 | GO:0051983 | BP | 1 | GO:0015693 | BP | 1 | GO:0019674 | BP | 1 |
| GO:0090609 | BP | 1 | GO:0006474 | BP | 1 | GO:0001682 | BP | 1 | GO:0042906 | BP | 1 | GO:0046417 | BP | 1 |
| GO:0009584 | BP | 1 | GO:0042742 | BP | 1 | GO:0006426 | BP | 1 | GO:1900233 | BP | 1 | GO:0009099 | BP | 1 |

|            |    |   |            |    |   |            |    |   |            |    |   |            |    |   |
|------------|----|---|------------|----|---|------------|----|---|------------|----|---|------------|----|---|
| GO:0034620 | BP | 1 | GO:0009396 | BP | 1 | GO:0044119 | BP | 1 | GO:0048034 | BP | 1 | GO:0052163 | BP | 1 |
| GO:0015968 | BP | 1 | GO:0006435 | BP | 1 | GO:0033477 | BP | 1 | GO:0031427 | BP | 1 | GO:0003333 | BP | 1 |
| GO:0043335 | BP | 1 | GO:0009094 | BP | 1 | GO:0035971 | BP | 1 | GO:0015914 | BP | 1 | GO:0009436 | BP | 1 |
| GO:0002136 | BP | 1 | GO:0046296 | BP | 1 | GO:0090609 | BP | 1 | GO:0006399 | BP | 1 | GO:0045848 | BP | 1 |
| GO:0008299 | BP | 1 | GO:0015808 | BP | 1 | GO:0036460 | BP | 1 | GO:0043164 | BP | 1 | GO:0033389 | BP | 1 |
| GO:0006799 | BP | 1 | GO:0009448 | BP | 1 | GO:0042885 | BP | 1 | GO:0010498 | BP | 1 | GO:0050779 | BP | 1 |
| GO:0006091 | BP | 1 | GO:0019480 | BP | 1 | GO:0006220 | BP | 1 | GO:0009450 | BP | 1 | GO:0006598 | BP | 1 |
| GO:0018189 | BP | 1 | GO:0006298 | BP | 1 | GO:0032414 | BP | 1 | GO:0071805 | BP | 1 | GO:0034219 | BP | 1 |
| GO:0033611 | BP | 1 | GO:0033223 | BP | 1 | GO:0046653 | BP | 1 | GO:0006323 | BP | 1 | GO:0045493 | BP | 1 |
| GO:0033468 | BP | 1 | GO:0006265 | BP | 1 | GO:0030259 | BP | 1 | GO:0002098 | BP | 1 | GO:0042743 | BP | 1 |
| GO:0009098 | BP | 1 | GO:0070929 | BP | 1 | GO:0006972 | BP | 1 | GO:0043107 | BP | 1 | GO:0046081 | BP | 1 |
| GO:0009116 | BP | 1 | GO:0000027 | BP | 1 | GO:0019394 | BP | 1 | GO:0019299 | BP | 1 | GO:0015951 | BP | 1 |
| GO:0042262 | BP | 1 | GO:0045936 | BP | 1 | GO:0007049 | BP | 1 | GO:0008616 | BP | 1 | GO:0015818 | BP | 1 |
| GO:0043420 | BP | 1 | GO:0051983 | BP | 1 | GO:0009585 | BP | 1 | GO:0010038 | BP | 1 | GO:0006147 | BP | 1 |
| GO:0001125 | BP | 1 | GO:0001682 | BP | 1 | GO:0034775 | BP | 1 | GO:0006824 | BP | 1 | GO:0009437 | BP | 1 |
| GO:0006567 | BP | 1 | GO:0006426 | BP | 1 | GO:1900377 | BP | 1 | GO:0006420 | BP | 1 | GO:0010795 | BP | 1 |
| GO:0034354 | BP | 1 | GO:0044119 | BP | 1 | GO:0090347 | BP | 1 | GO:0015802 | BP | 1 | GO:0006747 | BP | 1 |
| GO:0089709 | BP | 1 | GO:0033477 | BP | 1 | GO:0006635 | BP | 1 | GO:0071289 | BP | 1 | GO:0015822 | BP | 1 |
| GO:0006177 | BP | 1 | GO:0035971 | BP | 1 | GO:0019428 | BP | 1 | GO:0046360 | BP | 1 | GO:0006069 | BP | 1 |
| GO:0002181 | BP | 1 | GO:0090609 | BP | 1 | GO:0055085 | BP | 1 | GO:0043103 | BP | 1 | GO:0006413 | BP | 1 |
| GO:0009307 | BP | 1 | GO:0036460 | BP | 1 | GO:0043488 | BP | 1 | GO:0006614 | BP | 1 | GO:0008104 | BP | 1 |
| GO:0098719 | BP | 1 | GO:0042885 | BP | 1 | GO:0019427 | BP | 1 | GO:0006569 | BP | 1 | GO:0031564 | BP | 1 |
| GO:0071294 | BP | 1 | GO:0006220 | BP | 1 | GO:0061077 | BP | 1 | GO:0016032 | BP | 1 | GO:0044097 | BP | 1 |
| GO:0006614 | BP | 1 | GO:0032414 | BP | 1 | GO:0008033 | BP | 1 | GO:0031167 | BP | 1 | GO:0031668 | BP | 1 |
| GO:0044210 | BP | 1 | GO:0046653 | BP | 1 | GO:0046295 | BP | 1 | GO:0006799 | BP | 1 | GO:0006518 | BP | 1 |
| GO:0006228 | BP | 1 | GO:0030259 | BP | 1 | GO:0019646 | BP | 1 | GO:0006164 | BP | 1 | GO:0051259 | BP | 1 |
| GO:0009254 | BP | 1 | GO:0015628 | BP | 1 | GO:0070475 | BP | 1 | GO:0009092 | BP | 1 | GO:0006808 | BP | 1 |
| GO:0006235 | BP | 1 | GO:0006972 | BP | 1 | GO:0000271 | BP | 1 | GO:0018896 | BP | 1 | GO:0006071 | BP | 1 |
| GO:0006465 | BP | 1 | GO:0019394 | BP | 1 | GO:0000731 | BP | 1 | GO:0006879 | BP | 1 | GO:0070417 | BP | 1 |
| GO:1901891 | BP | 1 | GO:0046677 | BP | 1 | GO:0042866 | BP | 1 | GO:0006545 | BP | 1 | GO:0015853 | BP | 1 |
| GO:0031280 | BP | 1 | GO:0007049 | BP | 1 | GO:0000462 | BP | 1 | GO:0001680 | BP | 1 | GO:0071470 | BP | 1 |
| GO:0006437 | BP | 1 | GO:0009585 | BP | 1 | GO:0019674 | BP | 1 | GO:0042744 | BP | 1 | GO:0090529 | BP | 1 |
| GO:0006569 | BP | 1 | GO:0034775 | BP | 1 | GO:0046417 | BP | 1 | GO:0019538 | BP | 1 | GO:0032781 | BP | 1 |
| GO:0009294 | BP | 1 | GO:1900377 | BP | 1 | GO:0009099 | BP | 1 | GO:0019748 | BP | 1 | GO:0009249 | BP | 1 |
| GO:0046274 | BP | 1 | GO:0090347 | BP | 1 | GO:0052163 | BP | 1 | GO:0006400 | BP | 1 | GO:0035998 | BP | 1 |
| GO:0006616 | BP | 1 | GO:0006635 | BP | 1 | GO:0003333 | BP | 1 | GO:0071268 | BP | 1 | GO:0051085 | BP | 1 |
| GO:1903810 | BP | 1 | GO:0019428 | BP | 1 | GO:0009436 | BP | 1 | GO:0019835 | BP | 1 | GO:0006422 | BP | 1 |
| GO:0044097 | BP | 1 | GO:0043488 | BP | 1 | GO:0045848 | BP | 1 | GO:0035435 | BP | 1 | GO:0009247 | BP | 1 |
| GO:0051782 | BP | 1 | GO:0019427 | BP | 1 | GO:0033389 | BP | 1 | GO:0010128 | BP | 1 | GO:0010468 | BP | 1 |
| GO:0009163 | BP | 1 | GO:0061077 | BP | 1 | GO:0050779 | BP | 1 | GO:0042777 | BP | 1 | GO:0018339 | BP | 1 |
| GO:0043902 | BP | 1 | GO:0006631 | BP | 1 | GO:0006598 | BP | 1 | GO:0016036 | BP | 1 | GO:0032150 | BP | 1 |
| GO:0043171 | BP | 1 | GO:0008033 | BP | 1 | GO:0034219 | BP | 1 | GO:0046177 | BP | 1 | GO:0006203 | BP | 1 |
| GO:0015847 | BP | 1 | GO:0046295 | BP | 1 | GO:0045493 | BP | 1 | GO:0019752 | BP | 1 | GO:0044210 | BP | 1 |
| GO:0044571 | BP | 1 | GO:0019646 | BP | 1 | GO:0042743 | BP | 1 | GO:0045226 | BP | 1 | GO:0009231 | BP | 1 |
| GO:0097053 | BP | 1 | GO:0070475 | BP | 1 | GO:0046081 | BP | 1 | GO:0030026 | BP | 1 | GO:0006012 | BP | 1 |



|            |    |   |            |    |   |            |    |   |            |    |   |            |    |   |
|------------|----|---|------------|----|---|------------|----|---|------------|----|---|------------|----|---|
| GO:0090529 | BP | 1 | GO:0006790 | BP | 1 | GO:0015951 | BP | 1 | GO:0045948 | BP | 1 | GO:1902564 | BP | 1 |
| GO:0006166 | BP | 1 | GO:0000271 | BP | 1 | GO:0015818 | BP | 1 | GO:0034983 | BP | 1 | GO:0006388 | BP | 1 |
| GO:0006241 | BP | 1 | GO:0000731 | BP | 1 | GO:0006147 | BP | 1 | GO:0051260 | BP | 1 | GO:0019679 | BP | 1 |
| GO:1904082 | BP | 1 | GO:0042866 | BP | 1 | GO:0009437 | BP | 1 | GO:0019557 | BP | 1 | GO:0043683 | BP | 1 |
| GO:0071472 | BP | 1 | GO:0000462 | BP | 1 | GO:0010795 | BP | 1 | GO:0006107 | BP | 1 | GO:0052164 | BP | 1 |
| GO:0016540 | BP | 1 | GO:0042493 | BP | 1 | GO:0006747 | BP | 1 | GO:0010810 | BP | 1 | GO:0045717 | BP | 1 |
| GO:0051604 | BP | 1 | GO:0019674 | BP | 1 | GO:0015822 | BP | 1 | GO:0070930 | BP | 1 | GO:0034355 | BP | 1 |
| GO:0019614 | BP | 1 | GO:0046417 | BP | 1 | GO:0006069 | BP | 1 | GO:0071218 | BP | 1 | GO:0034656 | BP | 1 |
| GO:0019270 | BP | 1 | GO:0009099 | BP | 1 | GO:0006413 | BP | 1 | GO:0048473 | BP | 1 | GO:0006233 | BP | 1 |
| GO:0019363 | BP | 1 | GO:0052163 | BP | 1 | GO:0008104 | BP | 1 | GO:0051353 | BP | 1 | GO:1901565 | BP | 1 |
| GO:0009266 | BP | 1 | GO:0003333 | BP | 1 | GO:0031564 | BP | 1 | GO:0006662 | BP | 1 | GO:0015794 | BP | 1 |
| GO:0009436 | BP | 1 | GO:0009436 | BP | 1 | GO:0044097 | BP | 1 | GO:0044209 | BP | 1 | GO:2000142 | BP | 1 |
| GO:0061504 | BP | 1 | GO:0045848 | BP | 1 | GO:0031668 | BP | 1 | GO:0042884 | BP | 1 | GO:0042594 | BP | 1 |
| GO:0010312 | BP | 1 | GO:0033389 | BP | 1 | GO:0006518 | BP | 1 | GO:0006508 | BP | 1 | GO:0015879 | BP | 1 |
| GO:0009712 | BP | 1 | GO:0050779 | BP | 1 | GO:0051259 | BP | 1 | GO:0010628 | BP | 1 | GO:0006427 | BP | 1 |
| GO:0006006 | BP | 1 | GO:0006598 | BP | 1 | GO:0006808 | BP | 1 | GO:0051453 | BP | 1 | GO:0015693 | BP | 1 |
| GO:0019427 | BP | 1 | GO:0034219 | BP | 1 | GO:0006071 | BP | 1 | GO:0019379 | BP | 1 | GO:0042906 | BP | 1 |
| GO:0036001 | BP | 1 | GO:0045493 | BP | 1 | GO:0070417 | BP | 1 | GO:0034552 | BP | 1 | GO:1900233 | BP | 1 |
| GO:0006065 | BP | 1 | GO:0042743 | BP | 1 | GO:0015853 | BP | 1 | GO:0019277 | BP | 1 | GO:0048034 | BP | 1 |
| GO:0019243 | BP | 1 | GO:0046081 | BP | 1 | GO:0071470 | BP | 1 | GO:0018104 | BP | 1 | GO:0031427 | BP | 1 |
| GO:0019856 | BP | 1 | GO:0015951 | BP | 1 | GO:0090529 | BP | 1 | GO:0019363 | BP | 1 | GO:0015914 | BP | 1 |
| GO:0015724 | BP | 1 | GO:0015818 | BP | 1 | GO:0032781 | BP | 1 | GO:0006788 | BP | 1 | GO:0016540 | BP | 1 |
| GO:0033389 | BP | 1 | GO:0006147 | BP | 1 | GO:0006541 | BP | 1 | GO:0046336 | BP | 1 | GO:0006399 | BP | 1 |
| GO:0006571 | BP | 1 | GO:0009437 | BP | 1 | GO:0009249 | BP | 1 | GO:0006011 | BP | 1 | GO:0043164 | BP | 1 |
| GO:0052164 | BP | 1 | GO:0010795 | BP | 1 | GO:0006418 | BP | 1 | GO:0006579 | BP | 1 | GO:0009308 | BP | 1 |
| GO:0006432 | BP | 1 | GO:0006747 | BP | 1 | GO:0035998 | BP | 1 | GO:0006780 | BP | 1 | GO:0010498 | BP | 1 |
| GO:0032150 | BP | 1 | GO:0015822 | BP | 1 | GO:0051085 | BP | 1 | GO:0019478 | BP | 1 | GO:0009450 | BP | 1 |
| GO:0035444 | BP | 1 | GO:0006069 | BP | 1 | GO:0006422 | BP | 1 | GO:0009166 | BP | 1 | GO:0008654 | BP | 1 |
| GO:0042884 | BP | 1 | GO:0006413 | BP | 1 | GO:0009247 | BP | 1 | GO:0002131 | BP | 1 | GO:0071805 | BP | 1 |
| GO:0006259 | BP | 1 | GO:0008104 | BP | 1 | GO:0007059 | BP | 1 | GO:0006556 | BP | 1 | GO:0009089 | BP | 1 |
| GO:0006855 | BP | 1 | GO:0031564 | BP | 1 | GO:0010468 | BP | 1 | GO:0015734 | BP | 1 | GO:0006323 | BP | 1 |
| GO:0006598 | BP | 1 | GO:0044097 | BP | 1 | GO:0019630 | BP | 1 | GO:0015944 | BP | 1 | GO:0002098 | BP | 1 |
| GO:0000470 | BP | 1 | GO:0031668 | BP | 1 | GO:0018339 | BP | 1 | GO:0070301 | BP | 1 | GO:0051171 | BP | 1 |
| GO:1901135 | BP | 1 | GO:0006518 | BP | 1 | GO:0032150 | BP | 1 | GO:0071467 | BP | 1 | GO:0043107 | BP | 1 |
| GO:0006014 | BP | 1 | GO:0051259 | BP | 1 | GO:0006203 | BP | 1 | GO:0050777 | BP | 1 | GO:0019299 | BP | 1 |
| GO:0016036 | BP | 1 | GO:0006808 | BP | 1 | GO:0044210 | BP | 1 | GO:0016998 | BP | 1 | GO:0008616 | BP | 1 |
| GO:0014070 | BP | 1 | GO:0006071 | BP | 1 | GO:0009231 | BP | 1 | GO:0042759 | BP | 1 | GO:0010038 | BP | 1 |
| GO:0006007 | BP | 1 | GO:0070417 | BP | 1 | GO:0006012 | BP | 1 | GO:0034599 | BP | 1 | GO:0006824 | BP | 1 |
| GO:0071897 | BP | 1 | GO:0015853 | BP | 1 | GO:1902564 | BP | 1 | GO:0006015 | BP | 1 | GO:0000920 | BP | 1 |
| GO:0015628 | BP | 1 | GO:0071470 | BP | 1 | GO:0006388 | BP | 1 | GO:0006166 | BP | 1 | GO:0006420 | BP | 1 |
| GO:0072323 | BP | 1 | GO:0090529 | BP | 1 | GO:0019679 | BP | 1 | GO:0098655 | BP | 1 | GO:0015802 | BP | 1 |
| GO:0006378 | BP | 1 | GO:0032781 | BP | 1 | GO:0043683 | BP | 1 | GO:0006208 | BP | 1 | GO:0071289 | BP | 1 |
| GO:0010498 | BP | 1 | GO:0006541 | BP | 1 | GO:0052164 | BP | 1 | GO:0019856 | BP | 1 | GO:0046360 | BP | 1 |
| GO:0010447 | BP | 1 | GO:0009249 | BP | 1 | GO:0045717 | BP | 1 | GO:0009234 | BP | 1 | GO:0044205 | BP | 1 |
| GO:0009447 | BP | 1 | GO:0006418 | BP | 1 | GO:0034355 | BP | 1 | GO:0000470 | BP | 1 | GO:0043103 | BP | 1 |

|            |    |   |            |    |   |            |    |   |            |    |   |            |    |   |
|------------|----|---|------------|----|---|------------|----|---|------------|----|---|------------|----|---|
| GO:1901137 | BP | 1 | GO:0035998 | BP | 1 | GO:0034656 | BP | 1 | GO:0034337 | BP | 1 | GO:0006614 | BP | 1 |
| GO:0006528 | BP | 1 | GO:0051085 | BP | 1 | GO:0006233 | BP | 1 | GO:0006228 | BP | 1 | GO:0006569 | BP | 1 |
| GO:0000372 | BP | 1 | GO:0006422 | BP | 1 | GO:0015827 | BP | 1 | GO:0080111 | BP | 1 | GO:0016032 | BP | 1 |
| GO:0046855 | BP | 1 | GO:0009247 | BP | 1 | GO:1901565 | BP | 1 | GO:0006139 | BP | 1 | GO:0031167 | BP | 1 |
| GO:0030026 | BP | 1 | GO:0010468 | BP | 1 | GO:0015794 | BP | 1 | GO:0006212 | BP | 1 | GO:0006799 | BP | 1 |
| GO:0033477 | BP | 1 | GO:0019630 | BP | 1 | GO:2000142 | BP | 1 | GO:0015721 | BP | 1 | GO:0006164 | BP | 1 |
| GO:0006458 | BP | 1 | GO:0018339 | BP | 1 | GO:0042594 | BP | 1 | GO:0015940 | BP | 1 | GO:0009092 | BP | 1 |
| GO:0032329 | BP | 1 | GO:0032150 | BP | 1 | GO:0015879 | BP | 1 | GO:0071292 | BP | 1 | GO:0018896 | BP | 1 |
| GO:0051259 | BP | 1 | GO:0006203 | BP | 1 | GO:0006427 | BP | 1 | GO:0009268 | BP | 1 | GO:0006879 | BP | 1 |
| GO:0006438 | BP | 1 | GO:0030435 | BP | 1 | GO:0015693 | BP | 1 | GO:0009225 | BP | 1 | GO:0006545 | BP | 1 |
| GO:0002143 | BP | 1 | GO:0044210 | BP | 1 | GO:0030641 | BP | 1 | GO:0009263 | BP | 1 | GO:0001680 | BP | 1 |
| GO:0051453 | BP | 1 | GO:0009231 | BP | 1 | GO:0042906 | BP | 1 | GO:0009294 | BP | 1 | GO:0042744 | BP | 1 |
| GO:0006777 | BP | 1 | GO:0006012 | BP | 1 | GO:1900233 | BP | 1 | GO:0019700 | BP | 1 | GO:0036001 | BP | 1 |
| GO:0009097 | BP | 1 | GO:1902564 | BP | 1 | GO:0046168 | BP | 1 | GO:0097175 | BP | 1 | GO:0019538 | BP | 1 |
| GO:0006793 | BP | 1 | GO:0006388 | BP | 1 | GO:0048034 | BP | 1 | GO:0051091 | BP | 1 | GO:0019748 | BP | 1 |
| GO:0009166 | BP | 1 | GO:0019679 | BP | 1 | GO:0031427 | BP | 1 | GO:0016485 | BP | 1 | GO:0006400 | BP | 1 |
| GO:0030164 | BP | 1 | GO:0043683 | BP | 1 | GO:0015914 | BP | 1 | GO:0015821 | BP | 1 | GO:0019853 | BP | 1 |
| GO:0009847 | BP | 1 | GO:0052164 | BP | 1 | GO:0016540 | BP | 1 | GO:0046618 | BP | 1 | GO:0071268 | BP | 1 |
| GO:0015829 | BP | 1 | GO:0045717 | BP | 1 | GO:0006399 | BP | 1 | GO:0045727 | BP | 1 | GO:0019835 | BP | 1 |
| GO:0000902 | BP | 1 | GO:0034355 | BP | 1 | GO:0043164 | BP | 1 | GO:1903424 | BP | 1 | GO:0035435 | BP | 1 |
| GO:0044262 | BP | 1 | GO:0034656 | BP | 1 | GO:0009308 | BP | 1 | GO:0019350 | BP | 1 | GO:0042777 | BP | 1 |
| GO:0006596 | BP | 1 | GO:0006233 | BP | 1 | GO:1990961 | BP | 1 | GO:0014070 | BP | 1 | GO:0016036 | BP | 1 |
| GO:0042174 | BP | 1 | GO:1901565 | BP | 1 | GO:0010498 | BP | 1 | GO:0009098 | BP | 1 | GO:0046177 | BP | 1 |
| GO:0033120 | BP | 1 | GO:0015794 | BP | 1 | GO:0009450 | BP | 1 | GO:0034204 | BP | 1 | GO:0019752 | BP | 1 |
| GO:0006425 | BP | 1 | GO:2000142 | BP | 1 | GO:0008654 | BP | 1 | GO:0001121 | BP | 1 | GO:0000162 | BP | 1 |
| GO:0010608 | BP | 1 | GO:0042594 | BP | 1 | GO:0071805 | BP | 1 | GO:0019432 | BP | 1 | GO:0045226 | BP | 1 |
| GO:0000271 | BP | 1 | GO:0015879 | BP | 1 | GO:0009089 | BP | 1 | GO:0051271 | BP | 1 | GO:0030026 | BP | 1 |
| GO:0006226 | BP | 1 | GO:0006427 | BP | 1 | GO:0071474 | BP | 1 | GO:0006574 | BP | 1 | GO:0045948 | BP | 1 |
| GO:0000716 | BP | 1 | GO:0015693 | BP | 1 | GO:0006323 | BP | 1 | GO:0120010 | BP | 1 | GO:0034983 | BP | 1 |
| GO:0042823 | BP | 1 | GO:0030641 | BP | 1 | GO:0002098 | BP | 1 | GO:0006561 | BP | 1 | GO:0051260 | BP | 1 |
| GO:0030255 | BP | 1 | GO:0042906 | BP | 1 | GO:0051171 | BP | 1 | GO:0042968 | BP | 1 | GO:0019557 | BP | 1 |
| GO:0006107 | BP | 1 | GO:1900233 | BP | 1 | GO:0043107 | BP | 1 | GO:0031280 | BP | 1 | GO:0006107 | BP | 1 |
| GO:0018012 | BP | 1 | GO:0046168 | BP | 1 | GO:0071236 | BP | 1 | GO:1901605 | BP | 1 | GO:0009116 | BP | 1 |
| GO:0006556 | BP | 1 | GO:0048034 | BP | 1 | GO:0019299 | BP | 1 | GO:2001295 | BP | 1 | GO:0010810 | BP | 1 |
| GO:0010921 | BP | 1 | GO:0031427 | BP | 1 | GO:0008616 | BP | 1 | GO:0018117 | BP | 1 | GO:0070930 | BP | 1 |
| GO:0006847 | BP | 1 | GO:0015914 | BP | 1 | GO:0010038 | BP | 1 | GO:0044237 | BP | 1 | GO:0071218 | BP | 1 |
| GO:0006747 | BP | 1 | GO:0016540 | BP | 1 | GO:0006824 | BP | 1 | GO:0019985 | BP | 1 | GO:0009073 | BP | 1 |
| GO:0031668 | BP | 1 | GO:0006399 | BP | 1 | GO:0006268 | BP | 1 | GO:0044874 | BP | 1 | GO:0033528 | BP | 1 |
| GO:0006886 | BP | 1 | GO:0043164 | BP | 1 | GO:0000920 | BP | 1 | GO:0009266 | BP | 1 | GO:0048473 | BP | 1 |
| GO:0061818 | BP | 1 | GO:1990961 | BP | 1 | GO:0006420 | BP | 1 | GO:0019464 | BP | 1 | GO:0051353 | BP | 1 |
| GO:0050928 | BP | 1 | GO:0010498 | BP | 1 | GO:0015802 | BP | 1 | GO:0006419 | BP | 1 | GO:0006662 | BP | 1 |
| GO:0055130 | BP | 1 | GO:0009450 | BP | 1 | GO:0015921 | BP | 1 | GO:0098721 | BP | 1 | GO:0044209 | BP | 1 |
| GO:0045727 | BP | 1 | GO:0008654 | BP | 1 | GO:0071289 | BP | 1 | GO:0045017 | BP | 1 | GO:0042884 | BP | 1 |
| GO:1902022 | BP | 1 | GO:0071805 | BP | 1 | GO:0046360 | BP | 1 | GO:0019540 | BP | 1 | GO:0019318 | BP | 1 |
| GO:0006220 | BP | 1 | GO:0009089 | BP | 1 | GO:0044205 | BP | 1 | GO:0043469 | BP | 1 | GO:0006508 | BP | 1 |

|            |    |   |            |    |   |            |    |   |            |    |   |            |    |   |
|------------|----|---|------------|----|---|------------|----|---|------------|----|---|------------|----|---|
| GO:0018937 | BP | 1 | GO:0006323 | BP | 1 | GO:0043103 | BP | 1 | GO:0006725 | BP | 1 | GO:0010628 | BP | 1 |
| GO:0042255 | BP | 1 | GO:0002098 | BP | 1 | GO:0006614 | BP | 1 | GO:0008300 | BP | 1 | GO:0051453 | BP | 1 |
| GO:0015979 | BP | 1 | GO:0051171 | BP | 1 | GO:0006569 | BP | 1 | GO:0006437 | BP | 1 | GO:0019379 | BP | 1 |
| GO:0043164 | BP | 1 | GO:0043107 | BP | 1 | GO:0016032 | BP | 1 | GO:0035429 | BP | 1 | GO:0034552 | BP | 1 |
| GO:0009255 | BP | 1 | GO:0071236 | BP | 1 | GO:0031167 | BP | 1 | GO:0070207 | BP | 1 | GO:0019420 | BP | 1 |
| GO:1901023 | BP | 1 | GO:0019299 | BP | 1 | GO:0006799 | BP | 1 | GO:0006596 | BP | 1 | GO:0019277 | BP | 1 |
| GO:0006782 | BP | 1 | GO:0008616 | BP | 1 | GO:0006164 | BP | 1 | GO:0009255 | BP | 1 | GO:0018104 | BP | 1 |
| GO:0050922 | BP | 1 | GO:0010038 | BP | 1 | GO:0009092 | BP | 1 | GO:0010243 | BP | 1 | GO:0009086 | BP | 1 |
| GO:0050779 | BP | 1 | GO:0006824 | BP | 1 | GO:0018896 | BP | 1 | GO:0017013 | BP | 1 | GO:0006014 | BP | 1 |
| GO:0090347 | BP | 1 | GO:0006268 | BP | 1 | GO:0006879 | BP | 1 | GO:0140114 | BP | 1 | GO:0006261 | BP | 1 |
| GO:0009231 | BP | 1 | GO:0000920 | BP | 1 | GO:0006545 | BP | 1 | GO:0055129 | BP | 1 | GO:0019363 | BP | 1 |
| GO:0042773 | BP | 1 | GO:0006420 | BP | 1 | GO:0001680 | BP | 1 | GO:0006429 | BP | 1 | GO:0009697 | BP | 1 |
| GO:0015824 | BP | 1 | GO:0015802 | BP | 1 | GO:0042744 | BP | 1 | GO:0042274 | BP | 1 | GO:0006788 | BP | 1 |
| GO:0006229 | BP | 1 | GO:0015921 | BP | 1 | GO:0036001 | BP | 1 | GO:0030004 | BP | 1 | GO:0046336 | BP | 1 |
| GO:0006545 | BP | 1 | GO:0071289 | BP | 1 | GO:0006857 | BP | 1 | GO:0006397 | BP | 1 | GO:0045227 | BP | 1 |
| GO:0009442 | BP | 1 | GO:0046360 | BP | 1 | GO:0006629 | BP | 1 | GO:2001039 | BP | 1 | GO:0006011 | BP | 1 |
| GO:0009056 | BP | 1 | GO:0044205 | BP | 1 | GO:0019538 | BP | 1 | GO:0030643 | BP | 1 | GO:0006579 | BP | 1 |
| GO:0042759 | BP | 1 | GO:0043103 | BP | 1 | GO:0044355 | BP | 1 | GO:0042026 | BP | 1 | GO:0006780 | BP | 1 |
| GO:0046686 | BP | 1 | GO:0006614 | BP | 1 | GO:0046656 | BP | 1 | GO:0030638 | BP | 1 | GO:0019478 | BP | 1 |
| GO:0009416 | BP | 1 | GO:0000820 | BP | 1 | GO:0019748 | BP | 1 | GO:0006145 | BP | 1 | GO:0031638 | BP | 1 |
| GO:0042203 | BP | 1 | GO:0006569 | BP | 1 | GO:0006400 | BP | 1 | GO:0036049 | BP | 1 | GO:0009166 | BP | 1 |
| GO:0006397 | BP | 1 | GO:0016032 | BP | 1 | GO:0019853 | BP | 1 | GO:0042942 | BP | 1 | GO:0002131 | BP | 1 |
| GO:0046470 | BP | 1 | GO:0031167 | BP | 1 | GO:0071268 | BP | 1 | GO:0043171 | BP | 1 | GO:0006556 | BP | 1 |
| GO:0006535 | BP | 1 | GO:0006799 | BP | 1 | GO:0019835 | BP | 1 | GO:0006865 | BP | 1 | GO:0015734 | BP | 1 |
| GO:0051290 | BP | 1 | GO:0006164 | BP | 1 | GO:0035435 | BP | 1 | GO:0006535 | BP | 1 | GO:0015944 | BP | 1 |
| GO:0006725 | BP | 1 | GO:0009092 | BP | 1 | GO:0010128 | BP | 1 | GO:0006886 | BP | 1 | GO:0046488 | BP | 1 |
| GO:0035435 | BP | 1 | GO:0018896 | BP | 1 | GO:0042777 | BP | 1 | GO:0019556 | BP | 1 | GO:0070301 | BP | 1 |
| GO:0019478 | BP | 1 | GO:0006879 | BP | 1 | GO:0016036 | BP | 1 | GO:0015810 | BP | 1 | GO:0071467 | BP | 1 |
| GO:0016114 | BP | 1 | GO:0006545 | BP | 1 | GO:0046177 | BP | 1 | GO:0006432 | BP | 1 | GO:0050777 | BP | 1 |
| GO:0006986 | BP | 1 | GO:0001680 | BP | 1 | GO:0019752 | BP | 1 | GO:0018125 | BP | 1 | GO:0016998 | BP | 1 |
| GO:0042777 | BP | 1 | GO:0042744 | BP | 1 | GO:0000162 | BP | 1 | GO:0006353 | BP | 1 | GO:0042759 | BP | 1 |
| GO:0006807 | BP | 1 | GO:0036001 | BP | 1 | GO:0045226 | BP | 1 | GO:0071472 | BP | 1 | GO:0034599 | BP | 1 |
| GO:0006233 | BP | 1 | GO:0006857 | BP | 1 | GO:0030026 | BP | 1 | GO:0019805 | BP | 1 | GO:0006015 | BP | 1 |
| GO:0046256 | BP | 1 | GO:0006629 | BP | 1 | GO:0045948 | BP | 1 | GO:0045883 | BP | 1 | GO:0006166 | BP | 1 |
| GO:0051258 | BP | 1 | GO:0019538 | BP | 1 | GO:0034983 | BP | 1 | GO:0030042 | BP | 1 | GO:0098655 | BP | 1 |
| GO:0110155 | BP | 1 | GO:0044355 | BP | 1 | GO:0051260 | BP | 1 | GO:0000372 | BP | 1 | GO:0006208 | BP | 1 |
| GO:0006468 | BP | 1 | GO:0046656 | BP | 1 | GO:0019557 | BP | 1 | GO:0006655 | BP | 1 | GO:0019856 | BP | 1 |
| GO:0044237 | BP | 1 | GO:0019748 | BP | 1 | GO:0006107 | BP | 1 | GO:0015829 | BP | 1 | GO:0006275 | BP | 1 |
| GO:0006751 | BP | 1 | GO:0006400 | BP | 1 | GO:0009116 | BP | 1 | GO:1903810 | BP | 1 | GO:0033611 | BP | 1 |
| GO:1900751 | BP | 1 | GO:0019853 | BP | 1 | GO:0010810 | BP | 1 | GO:0089709 | BP | 1 | GO:0009234 | BP | 1 |
| GO:0006382 | BP | 1 | GO:0006355 | BP | 1 | GO:0070930 | BP | 1 | GO:0042953 | BP | 1 | GO:0046688 | BP | 1 |
| GO:0042742 | BP | 1 | GO:0071268 | BP | 1 | GO:0071218 | BP | 1 | GO:0070894 | BP | 1 | GO:0006744 | BP | 1 |
| GO:0019432 | BP | 1 | GO:0019835 | BP | 1 | GO:0009073 | BP | 1 | GO:0009435 | BP | 1 | GO:0000470 | BP | 1 |
| GO:0006285 | BP | 1 | GO:0035435 | BP | 1 | GO:0033528 | BP | 1 | GO:0009072 | BP | 1 | GO:0034337 | BP | 1 |
| GO:0009164 | BP | 1 | GO:0042777 | BP | 1 | GO:0048473 | BP | 1 | GO:0006807 | BP | 1 | GO:0009236 | BP | 1 |

|            |    |   |            |    |   |            |    |   |            |    |   |            |    |   |
|------------|----|---|------------|----|---|------------|----|---|------------|----|---|------------|----|---|
| GO:0010810 | BP | 1 | GO:0016036 | BP | 1 | GO:0051353 | BP | 1 | GO:0006847 | BP | 1 | GO:0006228 | BP | 1 |
| GO:0009063 | BP | 1 | GO:0046177 | BP | 1 | GO:0006662 | BP | 1 | GO:0090071 | BP | 1 | GO:0080111 | BP | 1 |
| GO:0006231 | BP | 1 | GO:0019752 | BP | 1 | GO:0044209 | BP | 1 | GO:0009163 | BP | 1 | GO:0006139 | BP | 1 |
| GO:0060274 | BP | 1 | GO:0000162 | BP | 1 | GO:0042884 | BP | 1 | GO:0015969 | BP | 1 | GO:0006212 | BP | 1 |
| GO:0006574 | BP | 1 | GO:0045226 | BP | 1 | GO:0019318 | BP | 1 | GO:0034644 | BP | 1 | GO:0015721 | BP | 1 |
| GO:0035600 | BP | 1 | GO:0030026 | BP | 1 | GO:0006508 | BP | 1 | GO:0019243 | BP | 1 | GO:0015940 | BP | 1 |
| GO:0043639 | BP | 1 | GO:0045948 | BP | 1 | GO:0010628 | BP | 1 | GO:0000723 | BP | 1 | GO:0071292 | BP | 1 |
| GO:0019379 | BP | 1 | GO:0034983 | BP | 1 | GO:0051453 | BP | 1 | GO:0044787 | BP | 1 | GO:0009268 | BP | 1 |
| GO:1902280 | BP | 1 | GO:0051260 | BP | 1 | GO:0019379 | BP | 1 | GO:0046854 | BP | 1 | GO:0009225 | BP | 1 |
| GO:0002943 | BP | 1 | GO:0019557 | BP | 1 | GO:0034552 | BP | 1 | GO:0006382 | BP | 1 | GO:0009263 | BP | 1 |
| GO:0015944 | BP | 1 | GO:0006107 | BP | 1 | GO:0019420 | BP | 1 | GO:0006564 | BP | 1 | GO:0009294 | BP | 1 |
| GO:0019509 | BP | 1 | GO:0009116 | BP | 1 | GO:0009228 | BP | 1 | GO:0032978 | BP | 1 | GO:0019700 | BP | 1 |
| GO:0006579 | BP | 1 | GO:0010810 | BP | 1 | GO:0019277 | BP | 1 | GO:1901260 | BP | 1 | GO:0097175 | BP | 1 |
| GO:0046417 | BP | 1 | GO:0070930 | BP | 1 | GO:0018104 | BP | 1 | GO:0006450 | BP | 1 | GO:0051091 | BP | 1 |
| GO:0006741 | BP | 1 | GO:0071218 | BP | 1 | GO:0006014 | BP | 1 | GO:0043687 | BP | 1 | GO:0016485 | BP | 1 |
| GO:0046177 | BP | 1 | GO:0009073 | BP | 1 | GO:0006261 | BP | 1 | GO:0048870 | BP | 1 | GO:0015821 | BP | 1 |
| GO:0019428 | BP | 1 | GO:0033528 | BP | 1 | GO:0019619 | BP | 1 | GO:0006571 | BP | 1 | GO:0046618 | BP | 1 |
| GO:0032781 | BP | 1 | GO:0048473 | BP | 1 | GO:0019363 | BP | 1 | GO:0042780 | BP | 1 | GO:0045727 | BP | 1 |
| GO:0046296 | BP | 1 | GO:0051353 | BP | 1 | GO:0009697 | BP | 1 | GO:0089705 | BP | 1 | GO:1903424 | BP | 1 |
| GO:0019877 | BP | 1 | GO:0006662 | BP | 1 | GO:0006788 | BP | 1 | GO:0000103 | BP | 1 | GO:0019350 | BP | 1 |
| GO:0031638 | BP | 1 | GO:0044209 | BP | 1 | GO:0046336 | BP | 1 | GO:0017004 | BP | 1 | GO:0014070 | BP | 1 |
| GO:0006542 | BP | 1 | GO:0042884 | BP | 1 | GO:0045227 | BP | 1 | GO:0034628 | BP | 1 | GO:0009098 | BP | 1 |
| GO:0006283 | BP | 1 | GO:0019318 | BP | 1 | GO:0006011 | BP | 1 | GO:0036506 | BP | 1 | GO:0034204 | BP | 1 |
| GO:0034656 | BP | 1 | GO:0006508 | BP | 1 | GO:0006579 | BP | 1 | GO:0009712 | BP | 1 | GO:0001121 | BP | 1 |
| GO:0006047 | BP | 1 | GO:0010628 | BP | 1 | GO:0006780 | BP | 1 | GO:0033120 | BP | 1 | GO:0006090 | BP | 1 |
| GO:0006584 | BP | 1 | GO:0051453 | BP | 1 | GO:0019478 | BP | 1 | GO:0006109 | BP | 1 | GO:0019432 | BP | 1 |
| GO:0006212 | BP | 1 | GO:0019379 | BP | 1 | GO:0031638 | BP | 1 | GO:0006172 | BP | 1 | GO:0051271 | BP | 1 |
| GO:0030004 | BP | 1 | GO:0034552 | BP | 1 | GO:0009166 | BP | 1 | GO:0015774 | BP | 1 | GO:0006574 | BP | 1 |
| GO:0018339 | BP | 1 | GO:0019420 | BP | 1 | GO:0002131 | BP | 1 | GO:0034620 | BP | 1 | GO:0120010 | BP | 1 |
| GO:0006879 | BP | 1 | GO:0009228 | BP | 1 | GO:0006556 | BP | 1 | GO:0071963 | BP | 1 | GO:0006561 | BP | 1 |
| GO:0045004 | BP | 1 | GO:0019277 | BP | 1 | GO:0015734 | BP | 1 | GO:0009093 | BP | 1 | GO:0042968 | BP | 1 |
| GO:0009305 | BP | 1 | GO:0018104 | BP | 1 | GO:0015944 | BP | 1 | GO:0030164 | BP | 1 | GO:0031280 | BP | 1 |
| GO:0006486 | BP | 1 | GO:0009086 | BP | 1 | GO:0046488 | BP | 1 | GO:0032790 | BP | 1 | GO:1901605 | BP | 1 |
| GO:0019538 | BP | 1 | GO:0006014 | BP | 1 | GO:0000302 | BP | 1 | GO:0009822 | BP | 1 | GO:2001295 | BP | 1 |
| GO:0032955 | BP | 1 | GO:0006261 | BP | 1 | GO:0070301 | BP | 1 | GO:0006354 | BP | 1 | GO:0018117 | BP | 1 |
| GO:0031427 | BP | 1 | GO:0019619 | BP | 1 | GO:0071467 | BP | 1 | GO:0006555 | BP | 1 | GO:0044237 | BP | 1 |
| GO:0019069 | BP | 1 | GO:0019363 | BP | 1 | GO:0050777 | BP | 1 | GO:0006285 | BP | 1 | GO:0019985 | BP | 1 |
| GO:0051353 | BP | 1 | GO:0009697 | BP | 1 | GO:0016998 | BP | 1 | GO:0035999 | BP | 1 | GO:0008643 | BP | 1 |
| GO:0106035 | BP | 1 | GO:0006788 | BP | 1 | GO:0042759 | BP | 1 | GO:0046689 | BP | 1 | GO:0044874 | BP | 1 |
| GO:0009082 | BP | 1 | GO:0046336 | BP | 1 | GO:0071475 | BP | 1 | GO:0110155 | BP | 1 | GO:0009266 | BP | 1 |
| GO:0070814 | BP | 1 | GO:0045227 | BP | 1 | GO:0034599 | BP | 1 | GO:0070206 | BP | 1 | GO:0019464 | BP | 1 |
| GO:0009448 | BP | 1 | GO:0006011 | BP | 1 | GO:0006015 | BP | 1 | GO:0006425 | BP | 1 | GO:0006419 | BP | 1 |
| GO:0033567 | BP | 1 | GO:0006579 | BP | 1 | GO:0006166 | BP | 1 | GO:0030001 | BP | 1 | GO:0098721 | BP | 1 |
| GO:0071266 | BP | 1 | GO:0006780 | BP | 1 | GO:0098655 | BP | 1 | GO:0006083 | BP | 1 | GO:0043711 | BP | 1 |
| GO:0070206 | BP | 1 | GO:0019478 | BP | 1 | GO:0006208 | BP | 1 | GO:0006047 | BP | 1 | GO:0045017 | BP | 1 |

|            |    |     |            |    |   |            |    |   |            |    |   |            |    |   |
|------------|----|-----|------------|----|---|------------|----|---|------------|----|---|------------|----|---|
| GO:0019350 | BP | 1   | GO:0006412 | BP | 1 | GO:0019856 | BP | 1 | GO:0034227 | BP | 1 | GO:0019540 | BP | 1 |
| GO:0045936 | BP | 1   | GO:0031638 | BP | 1 | GO:0033611 | BP | 1 | GO:0006825 | BP | 1 | GO:0043469 | BP | 1 |
| GO:0071139 | BP | 1   | GO:0009166 | BP | 1 | GO:0009234 | BP | 1 | GO:0006007 | BP | 1 | GO:0006725 | BP | 1 |
| GO:0036049 | BP | 1   | GO:0002131 | BP | 1 | GO:0046688 | BP | 1 | GO:0030497 | BP | 1 | GO:0008300 | BP | 1 |
| GO:0015879 | BP | 1   | GO:0006556 | BP | 1 | GO:0006744 | BP | 1 | GO:1902022 | BP | 1 | GO:0019878 | BP | 1 |
| GO:0070417 | BP | 1   | GO:0015734 | BP | 1 | GO:0000470 | BP | 1 | GO:0042843 | BP | 1 | GO:0006437 | BP | 1 |
| GO:0006433 | BP | 1   | GO:0015944 | BP | 1 | GO:0034337 | BP | 1 | GO:0032784 | BP | 1 | GO:0035429 | BP | 1 |
| GO:0045883 | BP | 1   | GO:0046488 | BP | 1 | GO:0009236 | BP | 1 | GO:0019544 | BP | 1 | GO:0009372 | BP | 1 |
| GO:0015721 | BP | 1   | GO:0000302 | BP | 1 | GO:0110051 | BP | 1 | GO:0008272 | BP | 1 | GO:0030154 | BP | 1 |
| GO:0007165 | BP | 1   | GO:0070301 | BP | 1 | GO:0006228 | BP | 1 | GO:0030152 | BP | 1 | GO:0070207 | BP | 1 |
| GO:0015976 | BP | 1   | GO:0071467 | BP | 1 | GO:0080111 | BP | 1 | GO:0009398 | BP | 1 | GO:0006596 | BP | 1 |
| GO:0046360 | BP | 1   | GO:0050777 | BP | 1 | GO:0006139 | BP | 1 | GO:0006177 | BP | 1 | GO:0009255 | BP | 1 |
| GO:0006098 | BP | 1   | GO:0016998 | BP | 1 | GO:0006537 | BP | 1 | GO:0071897 | BP | 1 | GO:0010243 | BP | 1 |
| GO:0015940 | BP | 1   | GO:0042759 | BP | 1 | GO:0006212 | BP | 1 | GO:0006401 | BP | 1 | GO:0006364 | BP | 1 |
| GO:0017004 | BP | 1   | GO:0034599 | BP | 1 | GO:0015721 | BP | 1 | GO:0032329 | BP | 1 | GO:0017013 | BP | 1 |
| GO:0070301 | BP | 1   | GO:0006015 | BP | 1 | GO:0015940 | BP | 1 | GO:0015979 | BP | 1 | GO:0140114 | BP | 1 |
| GO:0018160 | BP | 1   | GO:0006166 | BP | 1 | GO:0036104 | BP | 1 | GO:0009691 | BP | 1 | GO:0055129 | BP | 1 |
| GO:0018125 | BP | 1   | GO:0098655 | BP | 1 | GO:0071292 | BP | 1 | GO:0015689 | BP | 1 | GO:0006429 | BP | 1 |
| GO:0046167 | BP | 1   | GO:0006208 | BP | 1 | GO:0009245 | BP | 1 | GO:0042276 | BP | 1 | GO:0042274 | BP | 1 |
| GO:0071805 | BP | 1   | GO:0019856 | BP | 1 | GO:0009268 | BP | 1 | GO:0045719 | BP | 1 | GO:0030004 | BP | 1 |
| GO:0035971 | BP | 1   | GO:0006275 | BP | 1 | GO:0009244 | BP | 1 | GO:0035444 | BP | 1 | GO:0006397 | BP | 1 |
| GO:0015810 | BP | 1   | GO:0033611 | BP | 1 | GO:0009225 | BP | 1 | GO:0071266 | BP | 1 | GO:0047484 | BP | 1 |
| GO:0015821 | BP | 1   | GO:0009234 | BP | 1 | GO:0009263 | BP | 1 | GO:1900376 | BP | 1 | GO:2001039 | BP | 1 |
| GO:0045732 | BP | 1   | GO:0046688 | BP | 1 | GO:0009294 | BP | 1 | GO:0002100 | BP | 1 | GO:0030643 | BP | 1 |
| GO:0009117 | BP | 1   | GO:0006744 | BP | 1 | GO:0019700 | BP | 1 | GO:0006424 | BP | 1 | GO:0006119 | BP | 1 |
| GO:0016021 | CC | ### | GO:0008360 | BP | 1 | GO:0097175 | BP | 1 | GO:0036298 | BP | 1 | GO:0042026 | BP | 1 |
| GO:0005840 | CC | ### | GO:0000470 | BP | 1 | GO:0051091 | BP | 1 | GO:0006436 | BP | 1 | GO:0030638 | BP | 1 |
| GO:0015935 | CC | 1   | GO:0034337 | BP | 1 | GO:0016485 | BP | 1 | GO:0006793 | BP | 1 | GO:0006145 | BP | 1 |
| GO:0045261 | CC | 1   | GO:0009236 | BP | 1 | GO:0015821 | BP | 1 | GO:0016311 | BP | 1 | GO:0036049 | BP | 1 |
| GO:0015934 | CC | 1   | GO:0110051 | BP | 1 | GO:0046618 | BP | 1 | GO:0050928 | BP | 1 | GO:0042942 | BP | 1 |
| GO:0015627 | CC | 1   | GO:0006228 | BP | 1 | GO:0045727 | BP | 1 | GO:0045903 | BP | 1 | GO:0002049 | BP | 1 |
| GO:0045281 | CC | 1   | GO:0080111 | BP | 1 | GO:1903424 | BP | 1 | GO:0006741 | BP | 1 | GO:0043171 | BP | 1 |
| GO:0031004 | CC | 1   | GO:0006139 | BP | 1 | GO:0019350 | BP | 1 | GO:0019632 | BP | 1 | GO:0006276 | BP | 1 |
| GO:0009276 | CC | 1   | GO:0006537 | BP | 1 | GO:0014070 | BP | 1 | GO:0070814 | BP | 1 | GO:0009052 | BP | 1 |
| GO:0009318 | CC | 1   | GO:0006212 | BP | 1 | GO:0009098 | BP | 1 | GO:0006106 | BP | 1 | GO:0006535 | BP | 1 |
| GO:0031522 | CC | 1   | GO:0015721 | BP | 1 | GO:0034204 | BP | 1 | GO:0033585 | BP | 1 | GO:0006886 | BP | 1 |
| GO:0009358 | CC | 1   | GO:0015940 | BP | 1 | GO:0001121 | BP | 1 | GO:0071280 | BP | 1 | GO:0019556 | BP | 1 |
| GO:0070469 | CC | 1   | GO:0036104 | BP | 1 | GO:0006090 | BP | 1 | GO:0010447 | BP | 1 | GO:0015810 | BP | 1 |
| GO:0098796 | CC | 1   | GO:0071292 | BP | 1 | GO:0015823 | BP | 1 | GO:1901891 | BP | 1 | GO:0006432 | BP | 1 |
| GO:0043684 | CC | 1   | GO:0009245 | BP | 1 | GO:0019432 | BP | 1 | GO:0006105 | BP | 1 | GO:0018125 | BP | 1 |
| GO:0005971 | CC | 1   | GO:0009268 | BP | 1 | GO:0051271 | BP | 1 | GO:0051258 | BP | 1 | GO:0006353 | BP | 1 |
| GO:0009366 | CC | 1   | GO:0009244 | BP | 1 | GO:0006574 | BP | 1 | GO:0015826 | BP | 1 | GO:0018364 | BP | 1 |
| GO:0009376 | CC | 1   | GO:0009225 | BP | 1 | GO:0120010 | BP | 1 | GO:0015941 | BP | 1 | GO:0071472 | BP | 1 |
| GO:0005856 | CC | 1   | GO:0009263 | BP | 1 | GO:0006561 | BP | 1 | GO:0006048 | BP | 1 | GO:0071578 | BP | 1 |
| GO:0044776 | CC | 1   | GO:0009294 | BP | 1 | GO:0051205 | BP | 1 | GO:0046686 | BP | 1 | GO:0019805 | BP | 1 |

|            |    |     |            |    |   |            |    |   |            |    |   |            |    |   |
|------------|----|-----|------------|----|---|------------|----|---|------------|----|---|------------|----|---|
| GO:0009349 | CC | 1   | GO:0019700 | BP | 1 | GO:0042968 | BP | 1 | GO:0030253 | BP | 1 | GO:0045883 | BP | 1 |
| GO:0043590 | CC | 1   | GO:0097175 | BP | 1 | GO:0031280 | BP | 1 | GO:0090527 | BP | 1 | GO:0030042 | BP | 1 |
| GO:0032300 | CC | 1   | GO:0051091 | BP | 1 | GO:1901605 | BP | 1 | GO:0016539 | BP | 1 | GO:0000372 | BP | 1 |
| GO:0009368 | CC | 1   | GO:0016485 | BP | 1 | GO:2001295 | BP | 1 | GO:0006433 | BP | 1 | GO:0006655 | BP | 1 |
| GO:0000015 | CC | 1   | GO:0015821 | BP | 1 | GO:0018117 | BP | 1 | GO:0050922 | BP | 1 | GO:0015829 | BP | 1 |
| GO:0097347 | CC | 1   | GO:0046618 | BP | 1 | GO:0044237 | BP | 1 | GO:1990145 | BP | 1 | GO:1903810 | BP | 1 |
| GO:0009326 | CC | 1   | GO:0045727 | BP | 1 | GO:0019985 | BP | 1 | GO:0120009 | BP | 1 | GO:0089709 | BP | 1 |
| GO:0005615 | CC | 1   | GO:1903424 | BP | 1 | GO:0008643 | BP | 1 | GO:0000154 | BP | 1 | GO:0042953 | BP | 1 |
| GO:1990228 | CC | 1   | GO:0019350 | BP | 1 | GO:0044874 | BP | 1 | GO:0045732 | BP | 1 | GO:0070894 | BP | 1 |
| GO:1990904 | CC | 1   | GO:0014070 | BP | 1 | GO:0009266 | BP | 1 | GO:0019740 | BP | 1 | GO:0009072 | BP | 1 |
| GO:0009316 | CC | 1   | GO:0009098 | BP | 1 | GO:0019464 | BP | 1 | GO:1901106 | BP | 1 | GO:0006807 | BP | 1 |
| GO:0042788 | CC | 1   | GO:0034204 | BP | 1 | GO:0006419 | BP | 1 | GO:0072321 | BP | 1 | GO:0006847 | BP | 1 |
| GO:0005839 | CC | 1   | GO:0009060 | BP | 1 | GO:0098721 | BP | 1 | GO:0017148 | BP | 1 | GO:0090071 | BP | 1 |
| GO:0009379 | CC | 1   | GO:0001121 | BP | 1 | GO:0043711 | BP | 1 | GO:0006654 | BP | 1 | GO:0009163 | BP | 1 |
| GO:0009337 | CC | 1   | GO:0006090 | BP | 1 | GO:0045017 | BP | 1 | GO:0015836 | BP | 1 | GO:0015969 | BP | 1 |
| GO:0045254 | CC | 1   | GO:0019432 | BP | 1 | GO:0019540 | BP | 1 | GO:0006146 | BP | 1 | GO:0034644 | BP | 1 |
| GO:0044096 | CC | 1   | GO:0051271 | BP | 1 | GO:0043469 | BP | 1 | GO:0052865 | BP | 1 | GO:0019243 | BP | 1 |
| GO:0048476 | CC | 1   | GO:0006574 | BP | 1 | GO:0006725 | BP | 1 | GO:0001666 | BP | 1 | GO:0000723 | BP | 1 |
| GO:0008076 | CC | 1   | GO:0120010 | BP | 1 | GO:0008300 | BP | 1 | GO:0008299 | BP | 1 | GO:0044787 | BP | 1 |
| GO:0045263 | CC | 1   | GO:0006561 | BP | 1 | GO:0019878 | BP | 1 | GO:0060326 | BP | 1 | GO:0046392 | BP | 1 |
| GO:0052718 | CC | 1   | GO:0051205 | BP | 1 | GO:0045150 | BP | 1 | GO:0006221 | BP | 1 | GO:0046854 | BP | 1 |
| GO:0033202 | CC | 1   | GO:0042968 | BP | 1 | GO:0006437 | BP | 1 | GO:1902023 | BP | 1 | GO:0006382 | BP | 1 |
| GO:1990220 | CC | 1   | GO:0031280 | BP | 1 | GO:0035429 | BP | 1 | GO:0033228 | BP | 1 | GO:0006564 | BP | 1 |
| GO:1990230 | CC | 1   | GO:1901605 | BP | 1 | GO:0009372 | BP | 1 | GO:0071287 | BP | 1 | GO:0032978 | BP | 1 |
| GO:0045282 | CC | 1   | GO:2001295 | BP | 1 | GO:0030154 | BP | 1 | GO:0015701 | BP | 1 | GO:1901260 | BP | 1 |
| GO:0099513 | CC | 1   | GO:0044237 | BP | 1 | GO:0070207 | BP | 1 | GO:0097053 | BP | 1 | GO:0006450 | BP | 1 |
| GO:0031012 | CC | 1   | GO:0019985 | BP | 1 | GO:0006596 | BP | 1 | GO:0019441 | BP | 1 | GO:0006096 | BP | 1 |
| GO:0036125 | CC | 1   | GO:0008643 | BP | 1 | GO:0009255 | BP | 1 | GO:0032508 | BP | 1 | GO:0015986 | BP | 1 |
| GO:0030956 | CC | 1   | GO:0044874 | BP | 1 | GO:0010243 | BP | 1 | GO:0015871 | BP | 1 | GO:0043687 | BP | 1 |
| GO:0033650 | CC | 1   | GO:0009266 | BP | 1 | GO:0006364 | BP | 1 | GO:0034354 | BP | 1 | GO:0048870 | BP | 1 |
| GO:0019008 | CC | 1   | GO:0019464 | BP | 1 | GO:0017013 | BP | 1 | GO:0006751 | BP | 1 | GO:0006571 | BP | 1 |
| GO:0070069 | CC | 1   | GO:0006419 | BP | 1 | GO:0140114 | BP | 1 | GO:0010608 | BP | 1 | GO:0006302 | BP | 1 |
| GO:0005835 | CC | 1   | GO:0042918 | BP | 1 | GO:0055129 | BP | 1 | GO:0044571 | BP | 1 | GO:0051603 | BP | 1 |
| GO:1990351 | CC | 1   | GO:0098721 | BP | 1 | GO:0006429 | BP | 1 | GO:0042128 | BP | 1 | GO:0042780 | BP | 1 |
| GO:0030428 | CC | 1   | GO:0043711 | BP | 1 | GO:0000725 | BP | 1 | GO:0006304 | BP | 1 | GO:0089705 | BP | 1 |
| GO:0045252 | CC | 1   | GO:0045017 | BP | 1 | GO:0042274 | BP | 1 | GO:0018937 | BP | 1 | GO:0000103 | BP | 1 |
| GO:0009522 | CC | 1   | GO:0019540 | BP | 1 | GO:0030004 | BP | 1 | GO:1904082 | BP | 1 | GO:0017004 | BP | 1 |
| GO:0045239 | CC | 1   | GO:0043469 | BP | 1 | GO:0019563 | BP | 1 | GO:0019684 | BP | 1 | GO:0034628 | BP | 1 |
| GO:0019867 | CC | 1   | GO:0006725 | BP | 1 | GO:0042930 | BP | 1 | GO:0006515 | BP | 1 | GO:0036506 | BP | 1 |
| GO:0005759 | CC | 1   | GO:0008300 | BP | 1 | GO:0006397 | BP | 1 | GO:0015812 | BP | 1 | GO:0009712 | BP | 1 |
| GO:0048500 | CC | 1   | GO:0019878 | BP | 1 | GO:0047484 | BP | 1 | GO:0006241 | BP | 1 | GO:0030488 | BP | 1 |
| GO:0016787 | MF | ### | GO:0045150 | BP | 1 | GO:2001039 | BP | 1 | GO:0006094 | BP | 1 | GO:0033120 | BP | 1 |
| GO:0016740 | MF | ### | GO:0006437 | BP | 1 | GO:0030643 | BP | 1 | GO:0006528 | BP | 1 | GO:0006109 | BP | 1 |
| GO:0003824 | MF | ### | GO:0035429 | BP | 1 | GO:0006119 | BP | 1 | GO:0009056 | BP | 1 | GO:0006172 | BP | 1 |
| GO:0016491 | MF | ### | GO:0009372 | BP | 1 | GO:0042026 | BP | 1 | GO:0051252 | BP | 1 | GO:0015774 | BP | 1 |

|            |    |     |            |    |   |            |    |   |            |    |      |            |    |   |
|------------|----|-----|------------|----|---|------------|----|---|------------|----|------|------------|----|---|
| GO:0008168 | MF | ### | GO:0030154 | BP | 1 | GO:0030638 | BP | 1 | GO:0060567 | BP | 1    | GO:0034620 | BP | 1 |
| GO:0016829 | MF | ### | GO:0070207 | BP | 1 | GO:0045947 | BP | 1 | GO:0006091 | BP | 1    | GO:0071963 | BP | 1 |
| GO:0016874 | MF | ### | GO:0006596 | BP | 1 | GO:0030091 | BP | 1 | GO:0002181 | BP | 1    | GO:0009093 | BP | 1 |
| GO:0051213 | MF | ### | GO:0009255 | BP | 1 | GO:0006145 | BP | 1 | GO:0009088 | BP | 1    | GO:0030164 | BP | 1 |
| GO:0004085 | MF | ### | GO:0010243 | BP | 1 | GO:0036049 | BP | 1 | GO:0070084 | BP | 1    | GO:0032790 | BP | 1 |
| GO:0003676 | MF | ### | GO:0006364 | BP | 1 | GO:0042942 | BP | 1 | GO:1900751 | BP | 1    | GO:0009822 | BP | 1 |
| GO:0051536 | MF | ### | GO:0017013 | BP | 1 | GO:0034605 | BP | 1 | GO:0015710 | BP | 1    | GO:0006354 | BP | 1 |
| GO:0016746 | MF | ### | GO:0140114 | BP | 1 | GO:0002049 | BP | 1 | GO:0044873 | BP | 1    | GO:0006555 | BP | 1 |
| GO:0016620 | MF | ### | GO:0055129 | BP | 1 | GO:0010033 | BP | 1 | GO:0006259 | BP | 1    | GO:0006285 | BP | 1 |
| GO:0003924 | MF | ### | GO:0006429 | BP | 1 | GO:0043171 | BP | 1 | GO:1901137 | BP | 1    | GO:0035999 | BP | 1 |
| GO:0051539 | MF | ### | GO:0000725 | BP | 1 | GO:0006276 | BP | 1 | GO:0044262 | BP | 1    | GO:0046689 | BP | 1 |
| GO:0008233 | MF | ### | GO:0042274 | BP | 1 | GO:0009052 | BP | 1 | GO:0097428 | BP | 1    | GO:0006269 | BP | 1 |
| GO:0008080 | MF | ### | GO:0030004 | BP | 1 | GO:0006535 | BP | 1 | GO:0101030 | BP | 1    | GO:0110155 | BP | 1 |
| GO:0102132 | MF | ### | GO:0019563 | BP | 1 | GO:0006886 | BP | 1 | GO:0046680 | BP | 1    | GO:0070206 | BP | 1 |
| GO:0102131 | MF | ### | GO:0042930 | BP | 1 | GO:0019556 | BP | 1 | GO:2000186 | BP | 1    | GO:0006425 | BP | 1 |
| GO:0016747 | MF | ### | GO:0006397 | BP | 1 | GO:0015810 | BP | 1 | GO:0051782 | BP | 1    | GO:0030001 | BP | 1 |
| GO:0003684 | MF | ### | GO:0047484 | BP | 1 | GO:0006432 | BP | 1 | GO:0001123 | BP | 1    | GO:0008615 | BP | 1 |
| GO:0051920 | MF | ### | GO:2001039 | BP | 1 | GO:0018125 | BP | 1 | GO:0010921 | BP | 1    | GO:0006083 | BP | 1 |
| GO:0046933 | MF | ### | GO:0030643 | BP | 1 | GO:0006353 | BP | 1 | GO:0006547 | BP | 1    | GO:0006047 | BP | 1 |
| GO:0016301 | MF | 1   | GO:0006119 | BP | 1 | GO:0005975 | BP | 1 | GO:0002136 | BP | 1    | GO:0034227 | BP | 1 |
| GO:0016853 | MF | 1   | GO:0042026 | BP | 1 | GO:0018364 | BP | 1 | GO:0015912 | BP | 1    | GO:0006825 | BP | 1 |
| GO:0016151 | MF | 1   | GO:0030638 | BP | 1 | GO:0071472 | BP | 1 | GO:0019516 | BP | 1    | GO:0006007 | BP | 1 |
| GO:0016705 | MF | 1   | GO:0045947 | BP | 1 | GO:0033252 | BP | 1 | GO:0010438 | BP | 1    | GO:1902022 | BP | 1 |
| GO:0004527 | MF | 1   | GO:0006145 | BP | 1 | GO:0071578 | BP | 1 | GO:0046278 | BP | 1    | GO:0046942 | BP | 1 |
| GO:0008324 | MF | 1   | GO:0036049 | BP | 1 | GO:0019805 | BP | 1 | GO:0043902 | BP | 1    | GO:0042843 | BP | 1 |
| GO:0004519 | MF | 1   | GO:0010165 | BP | 1 | GO:0050845 | BP | 1 | GO:0009254 | BP | 1    | GO:0009584 | BP | 1 |
| GO:0050661 | MF | 1   | GO:0042942 | BP | 1 | GO:0019608 | BP | 1 | GO:0000967 | BP | 1    | GO:0006082 | BP | 1 |
| GO:0004497 | MF | 1   | GO:0034605 | BP | 1 | GO:0045883 | BP | 1 | GO:0001762 | BP | 1    | GO:0032784 | BP | 1 |
| GO:0019843 | MF | 1   | GO:0002049 | BP | 1 | GO:1905647 | BP | 1 | GO:0009117 | BP | 1    | GO:0019544 | BP | 1 |
| GO:0003746 | MF | 1   | GO:0010033 | BP | 1 | GO:0030042 | BP | 1 | GO:0006306 | BP | 1    | GO:0008272 | BP | 1 |
| GO:0015450 | MF | 1   | GO:0043171 | BP | 1 | GO:0000372 | BP | 1 | GO:0009877 | BP | 1    | GO:0030152 | BP | 1 |
| GO:0042834 | MF | 1   | GO:0006276 | BP | 1 | GO:0019430 | BP | 1 | GO:0006529 | BP | 1    | GO:0009398 | BP | 1 |
| GO:0008910 | MF | 1   | GO:0009052 | BP | 1 | GO:0006655 | BP | 1 | GO:0042262 | BP | 1    | GO:0006101 | BP | 1 |
| GO:0016810 | MF | 1   | GO:0006535 | BP | 1 | GO:0015829 | BP | 1 | GO:0006829 | BP | 1    | GO:0006177 | BP | 1 |
| GO:0046983 | MF | 1   | GO:0015990 | BP | 1 | GO:1903810 | BP | 1 | GO:0043639 | BP | 1    | GO:0071897 | BP | 1 |
| GO:0008199 | MF | 1   | GO:0006886 | BP | 1 | GO:0089709 | BP | 1 | GO:0009267 | BP | 1    | GO:0006401 | BP | 1 |
| GO:0050662 | MF | 1   | GO:0019556 | BP | 1 | GO:0042953 | BP | 1 | GO:0010212 | BP | 1    | GO:0032329 | BP | 1 |
| GO:0004315 | MF | 1   | GO:0015810 | BP | 1 | GO:0070894 | BP | 1 | GO:0005840 | CC | 0.01 | GO:0015979 | BP | 1 |
| GO:0003735 | MF | 1   | GO:0006432 | BP | 1 | GO:0009072 | BP | 1 | GO:0016021 | CC | 0.01 | GO:0009306 | BP | 1 |
| GO:0004252 | MF | 1   | GO:0018125 | BP | 1 | GO:0006847 | BP | 1 | GO:0015935 | CC | 1    | GO:0042856 | BP | 1 |
| GO:0016627 | MF | 1   | GO:0006353 | BP | 1 | GO:0090071 | BP | 1 | GO:0015934 | CC | 1    | GO:0009691 | BP | 1 |
| GO:0004316 | MF | 1   | GO:0005975 | BP | 1 | GO:0071705 | BP | 1 | GO:0043684 | CC | 1    | GO:0015689 | BP | 1 |
| GO:0005525 | MF | 1   | GO:0018364 | BP | 1 | GO:0009163 | BP | 1 | GO:0045281 | CC | 1    | GO:0042276 | BP | 1 |
| GO:0003723 | MF | 1   | GO:0071472 | BP | 1 | GO:0015969 | BP | 1 | GO:0009379 | CC | 1    | GO:0045719 | BP | 1 |
| GO:0032453 | MF | 1   | GO:0033252 | BP | 1 | GO:0034644 | BP | 1 | GO:0045239 | CC | 1    | GO:0043085 | BP | 1 |

|            |    |   |            |    |   |            |    |   |            |    |   |            |    |   |
|------------|----|---|------------|----|---|------------|----|---|------------|----|---|------------|----|---|
| GO:0003855 | MF | 1 | GO:0071578 | BP | 1 | GO:0019243 | BP | 1 | GO:0019008 | CC | 1 | GO:0035444 | BP | 1 |
| GO:0102148 | MF | 1 | GO:0019805 | BP | 1 | GO:0000723 | BP | 1 | GO:0005971 | CC | 1 | GO:0071266 | BP | 1 |
| GO:0008924 | MF | 1 | GO:0050845 | BP | 1 | GO:0044787 | BP | 1 | GO:0005759 | CC | 1 | GO:1900376 | BP | 1 |
| GO:0004341 | MF | 1 | GO:0019608 | BP | 1 | GO:0046392 | BP | 1 | GO:0022627 | CC | 1 | GO:0002100 | BP | 1 |
| GO:0047975 | MF | 1 | GO:0045883 | BP | 1 | GO:0046854 | BP | 1 | GO:0031234 | CC | 1 | GO:0006424 | BP | 1 |
| GO:0016152 | MF | 1 | GO:0030042 | BP | 1 | GO:0006382 | BP | 1 | GO:0009321 | CC | 1 | GO:0036298 | BP | 1 |
| GO:0005345 | MF | 1 | GO:0000372 | BP | 1 | GO:0006564 | BP | 1 | GO:1990351 | CC | 1 | GO:0006436 | BP | 1 |
| GO:0003938 | MF | 1 | GO:0019430 | BP | 1 | GO:0032978 | BP | 1 | GO:0031160 | CC | 1 | GO:0006793 | BP | 1 |
| GO:0009883 | MF | 1 | GO:0006655 | BP | 1 | GO:1901260 | BP | 1 | GO:0005960 | CC | 1 | GO:0016311 | BP | 1 |
| GO:0008883 | MF | 1 | GO:0015829 | BP | 1 | GO:0006450 | BP | 1 | GO:0042651 | CC | 1 | GO:0050928 | BP | 1 |
| GO:0008906 | MF | 1 | GO:1903810 | BP | 1 | GO:0006096 | BP | 1 | GO:0046658 | CC | 1 | GO:0045903 | BP | 1 |
| GO:0004764 | MF | 1 | GO:0089709 | BP | 1 | GO:0015986 | BP | 1 | GO:0019867 | CC | 1 | GO:0006741 | BP | 1 |
| GO:0047575 | MF | 1 | GO:0042953 | BP | 1 | GO:0043687 | BP | 1 | GO:0009326 | CC | 1 | GO:0019632 | BP | 1 |
| GO:0018506 | MF | 1 | GO:0070894 | BP | 1 | GO:0048870 | BP | 1 | GO:0005948 | CC | 1 | GO:0070814 | BP | 1 |
| GO:0008173 | MF | 1 | GO:0009072 | BP | 1 | GO:0006571 | BP | 1 | GO:1990220 | CC | 1 | GO:0006106 | BP | 1 |
| GO:0061599 | MF | 1 | GO:0006807 | BP | 1 | GO:0006302 | BP | 1 | GO:0048500 | CC | 1 | GO:0033585 | BP | 1 |
| GO:0009039 | MF | 1 | GO:0006847 | BP | 1 | GO:0051603 | BP | 1 | GO:0044096 | CC | 1 | GO:0071280 | BP | 1 |
| GO:0004076 | MF | 1 | GO:0090071 | BP | 1 | GO:0042780 | BP | 1 | GO:0031522 | CC | 1 | GO:0030420 | BP | 1 |
| GO:0004855 | MF | 1 | GO:0071705 | BP | 1 | GO:0089705 | BP | 1 | GO:0008076 | CC | 1 | GO:0010447 | BP | 1 |
| GO:0031071 | MF | 1 | GO:0009163 | BP | 1 | GO:0000103 | BP | 1 | GO:0045263 | CC | 1 | GO:1901891 | BP | 1 |
| GO:0043621 | MF | 1 | GO:0015969 | BP | 1 | GO:0017004 | BP | 1 | GO:1990904 | CC | 1 | GO:0006105 | BP | 1 |
| GO:0047689 | MF | 1 | GO:0034644 | BP | 1 | GO:0034628 | BP | 1 | GO:0005615 | CC | 1 | GO:0051258 | BP | 1 |
| GO:0051787 | MF | 1 | GO:0019243 | BP | 1 | GO:0036506 | BP | 1 | GO:1990230 | CC | 1 | GO:0044718 | BP | 1 |
| GO:0015181 | MF | 1 | GO:0000723 | BP | 1 | GO:0009712 | BP | 1 | GO:0000015 | CC | 1 | GO:0015826 | BP | 1 |
| GO:0008760 | MF | 1 | GO:0044787 | BP | 1 | GO:0046654 | BP | 1 | GO:0022625 | CC | 1 | GO:0015941 | BP | 1 |
| GO:0015379 | MF | 1 | GO:0046392 | BP | 1 | GO:0030488 | BP | 1 | GO:0043590 | CC | 1 | GO:0006048 | BP | 1 |
| GO:0070403 | MF | 1 | GO:0046854 | BP | 1 | GO:0043448 | BP | 1 | GO:0005835 | CC | 1 | GO:0046686 | BP | 1 |
| GO:0044716 | MF | 1 | GO:0006382 | BP | 1 | GO:0033120 | BP | 1 | GO:0031421 | CC | 1 | GO:0030253 | BP | 1 |
| GO:0018662 | MF | 1 | GO:0006564 | BP | 1 | GO:0006109 | BP | 1 | GO:0009316 | CC | 1 | GO:0090527 | BP | 1 |
| GO:0102530 | MF | 1 | GO:0009820 | BP | 1 | GO:0006811 | BP | 1 | GO:0009380 | CC | 1 | GO:0016539 | BP | 1 |
| GO:0008730 | MF | 1 | GO:0032978 | BP | 1 | GO:0006172 | BP | 1 | GO:1990281 | CC | 1 | GO:0006433 | BP | 1 |
| GO:0010326 | MF | 1 | GO:1901260 | BP | 1 | GO:0015774 | BP | 1 | GO:0030428 | CC | 1 | GO:0050922 | BP | 1 |
| GO:0008456 | MF | 1 | GO:0006450 | BP | 1 | GO:0034620 | BP | 1 | GO:0009986 | CC | 1 | GO:1990145 | BP | 1 |
| GO:0008995 | MF | 1 | GO:0006096 | BP | 1 | GO:0071963 | BP | 1 | GO:0045254 | CC | 1 | GO:0006935 | BP | 1 |
| GO:0016041 | MF | 1 | GO:0015986 | BP | 1 | GO:0009093 | BP | 1 | GO:0005856 | CC | 1 | GO:0120009 | BP | 1 |
| GO:0009012 | MF | 1 | GO:0043687 | BP | 1 | GO:0030164 | BP | 1 | GO:0052718 | CC | 1 | GO:0000154 | BP | 1 |
| GO:0004040 | MF | 1 | GO:0048870 | BP | 1 | GO:0032790 | BP | 1 | GO:0009368 | CC | 1 | GO:0006970 | BP | 1 |
| GO:0008970 | MF | 1 | GO:0006571 | BP | 1 | GO:0009822 | BP | 1 | GO:0005839 | CC | 1 | GO:0045732 | BP | 1 |
| GO:0070677 | MF | 1 | GO:0006302 | BP | 1 | GO:0006351 | BP | 1 | GO:0030256 | CC | 1 | GO:0019740 | BP | 1 |
| GO:0004828 | MF | 1 | GO:0051603 | BP | 1 | GO:0006354 | BP | 1 | GO:0033650 | CC | 1 | GO:1901106 | BP | 1 |
| GO:0015654 | MF | 1 | GO:0042780 | BP | 1 | GO:0006555 | BP | 1 | GO:0009295 | CC | 1 | GO:0072321 | BP | 1 |
| GO:0003922 | MF | 1 | GO:0089705 | BP | 1 | GO:0006285 | BP | 1 | GO:0070088 | CC | 1 | GO:0017148 | BP | 1 |
| GO:0008817 | MF | 1 | GO:0000103 | BP | 1 | GO:0035999 | BP | 1 | GO:0009317 | CC | 1 | GO:0009239 | BP | 1 |
| GO:0018578 | MF | 1 | GO:0017004 | BP | 1 | GO:0006855 | BP | 1 | GO:0009318 | CC | 1 | GO:0006654 | BP | 1 |
| GO:0004334 | MF | 1 | GO:0034628 | BP | 1 | GO:0046689 | BP | 1 | GO:0030894 | CC | 1 | GO:0015836 | BP | 1 |



|            |    |   |            |    |   |            |    |   |            |    |      |            |    |   |
|------------|----|---|------------|----|---|------------|----|---|------------|----|------|------------|----|---|
| GO:0050519 | MF | 1 | GO:0036506 | BP | 1 | GO:0006269 | BP | 1 | GO:0036405 | CC | 1    | GO:0006146 | BP | 1 |
| GO:0004781 | MF | 1 | GO:0009712 | BP | 1 | GO:0031460 | BP | 1 | GO:0034707 | CC | 1    | GO:0052865 | BP | 1 |
| GO:0016868 | MF | 1 | GO:0046654 | BP | 1 | GO:0110155 | BP | 1 | GO:0045252 | CC | 1    | GO:0001666 | BP | 1 |
| GO:0005451 | MF | 1 | GO:0030488 | BP | 1 | GO:0070206 | BP | 1 | GO:0044164 | CC | 1    | GO:0008299 | BP | 1 |
| GO:0004325 | MF | 1 | GO:0043448 | BP | 1 | GO:0006425 | BP | 1 | GO:0009376 | CC | 1    | GO:0046777 | BP | 1 |
| GO:0008704 | MF | 1 | GO:0033120 | BP | 1 | GO:0030001 | BP | 1 | GO:0097347 | CC | 1    | GO:0060326 | BP | 1 |
| GO:0010340 | MF | 1 | GO:0006109 | BP | 1 | GO:0008615 | BP | 1 | GO:1990228 | CC | 1    | GO:0006221 | BP | 1 |
| GO:1901681 | MF | 1 | GO:0006172 | BP | 1 | GO:0071468 | BP | 1 | GO:0071575 | CC | 1    | GO:0007062 | BP | 1 |
| GO:0016595 | MF | 1 | GO:0015774 | BP | 1 | GO:0009243 | BP | 1 | GO:0044776 | CC | 1    | GO:1902023 | BP | 1 |
| GO:0047925 | MF | 1 | GO:0034620 | BP | 1 | GO:0006083 | BP | 1 | GO:0045261 | CC | 1    | GO:0033228 | BP | 1 |
| GO:0015188 | MF | 1 | GO:0071963 | BP | 1 | GO:0006047 | BP | 1 | GO:0099513 | CC | 1    | GO:0071287 | BP | 1 |
| GO:0047485 | MF | 1 | GO:0009093 | BP | 1 | GO:0034227 | BP | 1 | GO:0031012 | CC | 1    | GO:0015701 | BP | 1 |
| GO:0017178 | MF | 1 | GO:0030164 | BP | 1 | GO:0006825 | BP | 1 | GO:0070469 | CC | 1    | GO:0097053 | BP | 1 |
| GO:0004080 | MF | 1 | GO:0032790 | BP | 1 | GO:0006007 | BP | 1 | GO:0036125 | CC | 1    | GO:0019441 | BP | 1 |
| GO:0016790 | MF | 1 | GO:0009822 | BP | 1 | GO:0006144 | BP | 1 | GO:0009358 | CC | 1    | GO:0032508 | BP | 1 |
| GO:0009027 | MF | 1 | GO:0006351 | BP | 1 | GO:1902022 | BP | 1 | GO:0032991 | CC | 1    | GO:0015871 | BP | 1 |
| GO:0000036 | MF | 1 | GO:0006354 | BP | 1 | GO:0046942 | BP | 1 | GO:0009522 | CC | 1    | GO:0034354 | BP | 1 |
| GO:0004361 | MF | 1 | GO:0006555 | BP | 1 | GO:0042843 | BP | 1 | GO:0042788 | CC | 1    | GO:0006751 | BP | 1 |
| GO:0016437 | MF | 1 | GO:0006285 | BP | 1 | GO:0000724 | BP | 1 | GO:0032300 | CC | 1    | GO:0010608 | BP | 1 |
| GO:0004515 | MF | 1 | GO:0035999 | BP | 1 | GO:0009584 | BP | 1 | GO:0019898 | CC | 1    | GO:0006479 | BP | 1 |
| GO:0047527 | MF | 1 | GO:0006855 | BP | 1 | GO:0006082 | BP | 1 | GO:0098796 | CC | 1    | GO:0006584 | BP | 1 |
| GO:0033966 | MF | 1 | GO:0046689 | BP | 1 | GO:0032784 | BP | 1 | GO:0048476 | CC | 1    | GO:0044571 | BP | 1 |
| GO:0018479 | MF | 1 | GO:0006269 | BP | 1 | GO:0019544 | BP | 1 | GO:0009276 | CC | 1    | GO:0042128 | BP | 1 |
| GO:0005295 | MF | 1 | GO:0110155 | BP | 1 | GO:0008272 | BP | 1 | GO:0009349 | CC | 1    | GO:0006304 | BP | 1 |
| GO:0019148 | MF | 1 | GO:0070206 | BP | 1 | GO:0030152 | BP | 1 | GO:0000787 | CC | 1    | GO:0018937 | BP | 1 |
| GO:0008701 | MF | 1 | GO:0006425 | BP | 1 | GO:0009398 | BP | 1 | GO:0031004 | CC | 1    | GO:0097054 | BP | 1 |
| GO:0008375 | MF | 1 | GO:0006457 | BP | 1 | GO:0006101 | BP | 1 | GO:1990196 | CC | 1    | GO:1904082 | BP | 1 |
| GO:0030060 | MF | 1 | GO:0000453 | BP | 1 | GO:0006177 | BP | 1 | GO:0009337 | CC | 1    | GO:0019684 | BP | 1 |
| GO:0031404 | MF | 1 | GO:0030001 | BP | 1 | GO:0071897 | BP | 1 | GO:0009366 | CC | 1    | GO:0006515 | BP | 1 |
| GO:0008452 | MF | 1 | GO:0008615 | BP | 1 | GO:0006401 | BP | 1 | GO:0016787 | MF | 0    | GO:0015812 | BP | 1 |
| GO:0052656 | MF | 1 | GO:0071468 | BP | 1 | GO:0032329 | BP | 1 | GO:0003735 | MF | 0.00 | GO:0006241 | BP | 1 |
| GO:0031177 | MF | 1 | GO:0009243 | BP | 1 | GO:0015979 | BP | 1 | GO:0003824 | MF | 0.00 | GO:0006094 | BP | 1 |
| GO:0102998 | MF | 1 | GO:0006083 | BP | 1 | GO:0009306 | BP | 1 | GO:0016740 | MF | 0.00 | GO:0019354 | BP | 1 |
| GO:0004112 | MF | 1 | GO:0006047 | BP | 1 | GO:0042856 | BP | 1 | GO:0008168 | MF | 0.12 | GO:0006528 | BP | 1 |
| GO:0015077 | MF | 1 | GO:0034227 | BP | 1 | GO:0009691 | BP | 1 | GO:0016491 | MF | 0.17 | GO:0009056 | BP | 1 |
| GO:0030378 | MF | 1 | GO:0006825 | BP | 1 | GO:0015689 | BP | 1 | GO:0008233 | MF | 0.25 | GO:0051252 | BP | 1 |
| GO:0010181 | MF | 1 | GO:0006007 | BP | 1 | GO:0042276 | BP | 1 | GO:0051213 | MF | 0.34 | GO:0060567 | BP | 1 |
| GO:0016779 | MF | 1 | GO:0006144 | BP | 1 | GO:0045719 | BP | 1 | GO:0051539 | MF | 0.44 | GO:0006091 | BP | 1 |
| GO:0004613 | MF | 1 | GO:1902022 | BP | 1 | GO:0043085 | BP | 1 | GO:0019843 | MF | 0.58 | GO:0002181 | BP | 1 |
| GO:0018775 | MF | 1 | GO:0046942 | BP | 1 | GO:0006396 | BP | 1 | GO:0003924 | MF | 0.69 | GO:0009088 | BP | 1 |
| GO:0004077 | MF | 1 | GO:0042843 | BP | 1 | GO:0035444 | BP | 1 | GO:0016829 | MF | 0.86 | GO:0070084 | BP | 1 |
| GO:0004411 | MF | 1 | GO:0000724 | BP | 1 | GO:0071266 | BP | 1 | GO:0003746 | MF | 0.90 | GO:0006817 | BP | 1 |
| GO:0000703 | MF | 1 | GO:0009584 | BP | 1 | GO:1900376 | BP | 1 | GO:0051536 | MF | 1    | GO:1900751 | BP | 1 |
| GO:0047955 | MF | 1 | GO:0006082 | BP | 1 | GO:0002100 | BP | 1 | GO:0050661 | MF | 1    | GO:0015710 | BP | 1 |
| GO:0046565 | MF | 1 | GO:0032784 | BP | 1 | GO:0019545 | BP | 1 | GO:0016746 | MF | 1    | GO:0044873 | BP | 1 |

|            |    |   |            |    |   |            |    |   |            |    |   |            |    |      |
|------------|----|---|------------|----|---|------------|----|---|------------|----|---|------------|----|------|
| GO:0004768 | MF | 1 | GO:0009408 | BP | 1 | GO:0006424 | BP | 1 | GO:0102132 | MF | 1 | GO:0006259 | BP | 1    |
| GO:0102555 | MF | 1 | GO:0019544 | BP | 1 | GO:0036298 | BP | 1 | GO:0102131 | MF | 1 | GO:1901137 | BP | 1    |
| GO:0018817 | MF | 1 | GO:0008272 | BP | 1 | GO:0006436 | BP | 1 | GO:0004316 | MF | 1 | GO:0044262 | BP | 1    |
| GO:0004416 | MF | 1 | GO:0030152 | BP | 1 | GO:0006793 | BP | 1 | GO:0003723 | MF | 1 | GO:0097428 | BP | 1    |
| GO:0016799 | MF | 1 | GO:0009398 | BP | 1 | GO:0016311 | BP | 1 | GO:0008410 | MF | 1 | GO:0101030 | BP | 1    |
| GO:0015097 | MF | 1 | GO:0006101 | BP | 1 | GO:0050928 | BP | 1 | GO:0003755 | MF | 1 | GO:0046680 | BP | 1    |
| GO:0016618 | MF | 1 | GO:0006177 | BP | 1 | GO:0045903 | BP | 1 | GO:0005525 | MF | 1 | GO:2000186 | BP | 1    |
| GO:0003867 | MF | 1 | GO:0071897 | BP | 1 | GO:0006741 | BP | 1 | GO:0016620 | MF | 1 | GO:0000105 | BP | 1    |
| GO:0050194 | MF | 1 | GO:0006401 | BP | 1 | GO:0019632 | BP | 1 | GO:0004519 | MF | 1 | GO:0051782 | BP | 1    |
| GO:0009035 | MF | 1 | GO:0032329 | BP | 1 | GO:0070814 | BP | 1 | GO:0016874 | MF | 1 | GO:0001123 | BP | 1    |
| GO:0016830 | MF | 1 | GO:0015979 | BP | 1 | GO:0006106 | BP | 1 | GO:0003985 | MF | 1 | GO:0010921 | BP | 1    |
| GO:1990238 | MF | 1 | GO:0009306 | BP | 1 | GO:0033585 | BP | 1 | GO:0016705 | MF | 1 | GO:0006547 | BP | 1    |
| GO:0016780 | MF | 1 | GO:0042856 | BP | 1 | GO:0071280 | BP | 1 | GO:0004364 | MF | 1 | GO:0002136 | BP | 1    |
| GO:0008765 | MF | 1 | GO:0009691 | BP | 1 | GO:0030420 | BP | 1 | GO:0004527 | MF | 1 | GO:0009851 | BP | 1    |
| GO:0005350 | MF | 1 | GO:0015689 | BP | 1 | GO:0010447 | BP | 1 | GO:0008408 | MF | 1 | GO:0006189 | BP | 1    |
| GO:0042781 | MF | 1 | GO:0042276 | BP | 1 | GO:1901891 | BP | 1 | GO:0009982 | MF | 1 | GO:0015912 | BP | 1    |
| GO:0000774 | MF | 1 | GO:0045719 | BP | 1 | GO:0006105 | BP | 1 | GO:0016853 | MF | 1 | GO:0019516 | BP | 1    |
| GO:0005304 | MF | 1 | GO:0043085 | BP | 1 | GO:0051258 | BP | 1 | GO:0016747 | MF | 1 | GO:0030632 | BP | 1    |
| GO:0050560 | MF | 1 | GO:0006396 | BP | 1 | GO:0044718 | BP | 1 | GO:0051920 | MF | 1 | GO:0010438 | BP | 1    |
| GO:0044466 | MF | 1 | GO:0035444 | BP | 1 | GO:0015826 | BP | 1 | GO:0046933 | MF | 1 | GO:0006835 | BP | 1    |
| GO:0016818 | MF | 1 | GO:0071266 | BP | 1 | GO:0015941 | BP | 1 | GO:0016627 | MF | 1 | GO:0000917 | BP | 1    |
| GO:0004354 | MF | 1 | GO:1900376 | BP | 1 | GO:0006048 | BP | 1 | GO:0004085 | MF | 1 | GO:0006284 | BP | 1    |
| GO:0044668 | MF | 1 | GO:0002100 | BP | 1 | GO:0046686 | BP | 1 | GO:0008080 | MF | 1 | GO:0046278 | BP | 1    |
| GO:0016462 | MF | 1 | GO:0019545 | BP | 1 | GO:0030253 | BP | 1 | GO:0004497 | MF | 1 | GO:0043902 | BP | 1    |
| GO:0050347 | MF | 1 | GO:0006424 | BP | 1 | GO:1901998 | BP | 1 | GO:0003676 | MF | 1 | GO:0009254 | BP | 1    |
| GO:0008871 | MF | 1 | GO:0036298 | BP | 1 | GO:0090527 | BP | 1 | GO:0099620 | MF | 1 | GO:0000967 | BP | 1    |
| GO:0097266 | MF | 1 | GO:0009252 | BP | 1 | GO:0016539 | BP | 1 | GO:0004597 | MF | 1 | GO:0001762 | BP | 1    |
| GO:0016805 | MF | 1 | GO:0006436 | BP | 1 | GO:0006433 | BP | 1 | GO:0034023 | MF | 1 | GO:0009117 | BP | 1    |
| GO:0008113 | MF | 1 | GO:0006793 | BP | 1 | GO:0050922 | BP | 1 | GO:0008673 | MF | 1 | GO:0006306 | BP | 1    |
| GO:0030267 | MF | 1 | GO:0016311 | BP | 1 | GO:1990145 | BP | 1 | GO:0004400 | MF | 1 | GO:0009877 | BP | 1    |
| GO:0008961 | MF | 1 | GO:0050928 | BP | 1 | GO:0006935 | BP | 1 | GO:0016149 | MF | 1 | GO:0006529 | BP | 1    |
| GO:0008252 | MF | 1 | GO:0045903 | BP | 1 | GO:0120009 | BP | 1 | GO:0043295 | MF | 1 | GO:0042262 | BP | 1    |
| GO:0034480 | MF | 1 | GO:0006741 | BP | 1 | GO:0000154 | BP | 1 | GO:0008670 | MF | 1 | GO:0006829 | BP | 1    |
| GO:0035597 | MF | 1 | GO:0019632 | BP | 1 | GO:0006970 | BP | 1 | GO:0008791 | MF | 1 | GO:0043639 | BP | 1    |
| GO:0102308 | MF | 1 | GO:0070814 | BP | 1 | GO:0045732 | BP | 1 | GO:0047304 | MF | 1 | GO:0046292 | BP | 1    |
| GO:0008834 | MF | 1 | GO:0006106 | BP | 1 | GO:0019740 | BP | 1 | GO:0042132 | MF | 1 | GO:0009267 | BP | 1    |
| GO:0018627 | MF | 1 | GO:0033585 | BP | 1 | GO:1901106 | BP | 1 | GO:0004312 | MF | 1 | GO:0010043 | BP | 1    |
| GO:0003979 | MF | 1 | GO:0071280 | BP | 1 | GO:0072321 | BP | 1 | GO:0043531 | MF | 1 | GO:0010212 | BP | 1    |
| GO:0030371 | MF | 1 | GO:0030420 | BP | 1 | GO:0017148 | BP | 1 | GO:0052381 | MF | 1 | GO:0016021 | CC | 0.06 |
| GO:0009032 | MF | 1 | GO:0010447 | BP | 1 | GO:0009239 | BP | 1 | GO:0047930 | MF | 1 | GO:0005840 | CC | 0.74 |
| GO:0033767 | MF | 1 | GO:1901891 | BP | 1 | GO:0006654 | BP | 1 | GO:0097367 | MF | 1 | GO:0005737 | CC | 1    |
| GO:0009037 | MF | 1 | GO:0006105 | BP | 1 | GO:0015836 | BP | 1 | GO:0008783 | MF | 1 | GO:0043684 | CC | 1    |
| GO:0004322 | MF | 1 | GO:0051258 | BP | 1 | GO:0006146 | BP | 1 | GO:0047472 | MF | 1 | GO:0045281 | CC | 1    |
| GO:0015209 | MF | 1 | GO:0044718 | BP | 1 | GO:0052865 | BP | 1 | GO:0016672 | MF | 1 | GO:0009379 | CC | 1    |
| GO:0008781 | MF | 1 | GO:0015826 | BP | 1 | GO:0009314 | BP | 1 | GO:0015209 | MF | 1 | GO:0045239 | CC | 1    |

|            |    |   |            |    |   |            |    |   |            |    |   |            |    |   |
|------------|----|---|------------|----|---|------------|----|---|------------|----|---|------------|----|---|
| GO:0004735 | MF | 1 | GO:0015941 | BP | 1 | GO:0001666 | BP | 1 | GO:0016041 | MF | 1 | GO:0019008 | CC | 1 |
| GO:0008783 | MF | 1 | GO:0006048 | BP | 1 | GO:0008299 | BP | 1 | GO:0003871 | MF | 1 | GO:0005971 | CC | 1 |
| GO:0016717 | MF | 1 | GO:0046686 | BP | 1 | GO:0046777 | BP | 1 | GO:0004725 | MF | 1 | GO:0005759 | CC | 1 |
| GO:0004145 | MF | 1 | GO:0030253 | BP | 1 | GO:0060326 | BP | 1 | GO:0004169 | MF | 1 | GO:0009898 | CC | 1 |
| GO:0018581 | MF | 1 | GO:1901998 | BP | 1 | GO:0006221 | BP | 1 | GO:0050311 | MF | 1 | GO:0022627 | CC | 1 |
| GO:0018658 | MF | 1 | GO:0090527 | BP | 1 | GO:0007062 | BP | 1 | GO:0004462 | MF | 1 | GO:0015935 | CC | 1 |
| GO:0005315 | MF | 1 | GO:0016539 | BP | 1 | GO:1902023 | BP | 1 | GO:0050299 | MF | 1 | GO:0031234 | CC | 1 |
| GO:0015079 | MF | 1 | GO:0006433 | BP | 1 | GO:0033228 | BP | 1 | GO:0004081 | MF | 1 | GO:1990351 | CC | 1 |
| GO:0015125 | MF | 1 | GO:0050922 | BP | 1 | GO:0071287 | BP | 1 | GO:0004618 | MF | 1 | GO:0046930 | CC | 1 |
| GO:0017057 | MF | 1 | GO:1990145 | BP | 1 | GO:0015701 | BP | 1 | GO:0004152 | MF | 1 | GO:0031160 | CC | 1 |
| GO:0004534 | MF | 1 | GO:0006935 | BP | 1 | GO:0097053 | BP | 1 | GO:0002083 | MF | 1 | GO:0055052 | CC | 1 |
| GO:0003861 | MF | 1 | GO:0120009 | BP | 1 | GO:0019441 | BP | 1 | GO:0004039 | MF | 1 | GO:0005960 | CC | 1 |
| GO:0033711 | MF | 1 | GO:0000154 | BP | 1 | GO:0032508 | BP | 1 | GO:0000034 | MF | 1 | GO:0042651 | CC | 1 |
| GO:0043024 | MF | 1 | GO:0006970 | BP | 1 | GO:0015871 | BP | 1 | GO:0016034 | MF | 1 | GO:0046658 | CC | 1 |
| GO:0050566 | MF | 1 | GO:0045732 | BP | 1 | GO:0034354 | BP | 1 | GO:0008726 | MF | 1 | GO:0019867 | CC | 1 |
| GO:0034024 | MF | 1 | GO:0019740 | BP | 1 | GO:0006751 | BP | 1 | GO:0004252 | MF | 1 | GO:0009326 | CC | 1 |
| GO:0047265 | MF | 1 | GO:1901106 | BP | 1 | GO:0010608 | BP | 1 | GO:0004654 | MF | 1 | GO:0005948 | CC | 1 |
| GO:0003841 | MF | 1 | GO:0072321 | BP | 1 | GO:0006479 | BP | 1 | GO:0018581 | MF | 1 | GO:0009360 | CC | 1 |
| GO:0070040 | MF | 1 | GO:0017148 | BP | 1 | GO:0006584 | BP | 1 | GO:0004765 | MF | 1 | GO:1990220 | CC | 1 |
| GO:0036348 | MF | 1 | GO:0009239 | BP | 1 | GO:0044571 | BP | 1 | GO:0046537 | MF | 1 | GO:0048500 | CC | 1 |
| GO:0089714 | MF | 1 | GO:0006654 | BP | 1 | GO:0042128 | BP | 1 | GO:0004416 | MF | 1 | GO:0044096 | CC | 1 |
| GO:0052913 | MF | 1 | GO:0015836 | BP | 1 | GO:0006304 | BP | 1 | GO:0004044 | MF | 1 | GO:0031522 | CC | 1 |
| GO:0009030 | MF | 1 | GO:0006146 | BP | 1 | GO:0018937 | BP | 1 | GO:0004731 | MF | 1 | GO:1990077 | CC | 1 |
| GO:0015415 | MF | 1 | GO:0052865 | BP | 1 | GO:0097054 | BP | 1 | GO:0008829 | MF | 1 | GO:0008076 | CC | 1 |
| GO:0004176 | MF | 1 | GO:0001666 | BP | 1 | GO:1904082 | BP | 1 | GO:0015661 | MF | 1 | GO:0045263 | CC | 1 |
| GO:0004655 | MF | 1 | GO:0008299 | BP | 1 | GO:0019684 | BP | 1 | GO:1901681 | MF | 1 | GO:1990904 | CC | 1 |
| GO:0004056 | MF | 1 | GO:0046777 | BP | 1 | GO:0006515 | BP | 1 | GO:0004160 | MF | 1 | GO:0005615 | CC | 1 |
| GO:0043917 | MF | 1 | GO:0060326 | BP | 1 | GO:0015812 | BP | 1 | GO:0043907 | MF | 1 | GO:1990230 | CC | 1 |
| GO:0035539 | MF | 1 | GO:0006221 | BP | 1 | GO:0006241 | BP | 1 | GO:0018525 | MF | 1 | GO:0000015 | CC | 1 |
| GO:0008687 | MF | 1 | GO:0007062 | BP | 1 | GO:0006094 | BP | 1 | GO:0015930 | MF | 1 | GO:0022625 | CC | 1 |
| GO:0102966 | MF | 1 | GO:1902023 | BP | 1 | GO:0019354 | BP | 1 | GO:0004424 | MF | 1 | GO:0043590 | CC | 1 |
| GO:0017151 | MF | 1 | GO:0033228 | BP | 1 | GO:0006528 | BP | 1 | GO:0003857 | MF | 1 | GO:0005835 | CC | 1 |
| GO:0008641 | MF | 1 | GO:0071287 | BP | 1 | GO:0009056 | BP | 1 | GO:0000309 | MF | 1 | GO:0031421 | CC | 1 |
| GO:0042586 | MF | 1 | GO:0015701 | BP | 1 | GO:0051252 | BP | 1 | GO:0070573 | MF | 1 | GO:0009316 | CC | 1 |
| GO:0008661 | MF | 1 | GO:0097053 | BP | 1 | GO:0060567 | BP | 1 | GO:0015221 | MF | 1 | GO:0009380 | CC | 1 |
| GO:0036055 | MF | 1 | GO:0019441 | BP | 1 | GO:0006091 | BP | 1 | GO:0004838 | MF | 1 | GO:1990281 | CC | 1 |
| GO:0008700 | MF | 1 | GO:0032508 | BP | 1 | GO:0002181 | BP | 1 | GO:0047745 | MF | 1 | GO:0030428 | CC | 1 |
| GO:0034336 | MF | 1 | GO:0015871 | BP | 1 | GO:0009088 | BP | 1 | GO:0004177 | MF | 1 | GO:0009986 | CC | 1 |
| GO:0047372 | MF | 1 | GO:0034354 | BP | 1 | GO:0070084 | BP | 1 | GO:0004642 | MF | 1 | GO:0045254 | CC | 1 |
| GO:0015128 | MF | 1 | GO:0006751 | BP | 1 | GO:0006817 | BP | 1 | GO:0102543 | MF | 1 | GO:0005856 | CC | 1 |
| GO:0050417 | MF | 1 | GO:0010608 | BP | 1 | GO:1900751 | BP | 1 | GO:0052665 | MF | 1 | GO:0052718 | CC | 1 |
| GO:0008889 | MF | 1 | GO:0006479 | BP | 1 | GO:0015710 | BP | 1 | GO:0019003 | MF | 1 | GO:0009368 | CC | 1 |
| GO:0070042 | MF | 1 | GO:0044571 | BP | 1 | GO:0044873 | BP | 1 | GO:0015633 | MF | 1 | GO:0005839 | CC | 1 |
| GO:0032977 | MF | 1 | GO:0042128 | BP | 1 | GO:0006259 | BP | 1 | GO:0004413 | MF | 1 | GO:0030256 | CC | 1 |
| GO:0047304 | MF | 1 | GO:0006304 | BP | 1 | GO:1901137 | BP | 1 | GO:0004585 | MF | 1 | GO:0015934 | CC | 1 |

|            |    |   |            |    |   |            |    |      |            |    |   |            |    |      |
|------------|----|---|------------|----|---|------------|----|------|------------|----|---|------------|----|------|
| GO:0016823 | MF | 1 | GO:0018937 | BP | 1 | GO:0044262 | BP | 1    | GO:0052908 | MF | 1 | GO:0033650 | CC | 1    |
| GO:0004851 | MF | 1 | GO:0097054 | BP | 1 | GO:0006979 | BP | 1    | GO:0004750 | MF | 1 | GO:0009295 | CC | 1    |
| GO:0008176 | MF | 1 | GO:1904082 | BP | 1 | GO:0097428 | BP | 1    | GO:0015218 | MF | 1 | GO:0070088 | CC | 1    |
| GO:0047580 | MF | 1 | GO:0019684 | BP | 1 | GO:0101030 | BP | 1    | GO:0050608 | MF | 1 | GO:0009317 | CC | 1    |
| GO:0008903 | MF | 1 | GO:0006515 | BP | 1 | GO:0046680 | BP | 1    | GO:0004308 | MF | 1 | GO:0009318 | CC | 1    |
| GO:0019159 | MF | 1 | GO:0015812 | BP | 1 | GO:2000186 | BP | 1    | GO:0103111 | MF | 1 | GO:0030894 | CC | 1    |
| GO:0004783 | MF | 1 | GO:0006241 | BP | 1 | GO:0000105 | BP | 1    | GO:0047280 | MF | 1 | GO:0036405 | CC | 1    |
| GO:0060090 | MF | 1 | GO:0006094 | BP | 1 | GO:0051782 | BP | 1    | GO:0016208 | MF | 1 | GO:0034707 | CC | 1    |
| GO:0016742 | MF | 1 | GO:0019354 | BP | 1 | GO:0001123 | BP | 1    | GO:0008767 | MF | 1 | GO:0045252 | CC | 1    |
| GO:0047150 | MF | 1 | GO:0006528 | BP | 1 | GO:0010921 | BP | 1    | GO:0031418 | MF | 1 | GO:0044164 | CC | 1    |
| GO:0018548 | MF | 1 | GO:0009056 | BP | 1 | GO:0006547 | BP | 1    | GO:0008679 | MF | 1 | GO:0031226 | CC | 1    |
| GO:0003985 | MF | 1 | GO:0051252 | BP | 1 | GO:0002136 | BP | 1    | GO:0018620 | MF | 1 | GO:0009376 | CC | 1    |
| GO:0004731 | MF | 1 | GO:0060567 | BP | 1 | GO:0046496 | BP | 1    | GO:0043885 | MF | 1 | GO:0097347 | CC | 1    |
| GO:0004359 | MF | 1 | GO:0006091 | BP | 1 | GO:0009851 | BP | 1    | GO:0050061 | MF | 1 | GO:1990228 | CC | 1    |
| GO:0004819 | MF | 1 | GO:0042908 | BP | 1 | GO:0006189 | BP | 1    | GO:0008910 | MF | 1 | GO:0071575 | CC | 1    |
| GO:0008710 | MF | 1 | GO:0002181 | BP | 1 | GO:0015912 | BP | 1    | GO:0005542 | MF | 1 | GO:0044776 | CC | 1    |
| GO:0004491 | MF | 1 | GO:0009088 | BP | 1 | GO:0019516 | BP | 1    | GO:0008413 | MF | 1 | GO:0045261 | CC | 1    |
| GO:0004733 | MF | 1 | GO:0070084 | BP | 1 | GO:0019570 | BP | 1    | GO:0003934 | MF | 1 | GO:0099513 | CC | 1    |
| GO:0015218 | MF | 1 | GO:0006817 | BP | 1 | GO:0030632 | BP | 1    | GO:0008775 | MF | 1 | GO:0031012 | CC | 1    |
| GO:0000104 | MF | 1 | GO:1900751 | BP | 1 | GO:0010438 | BP | 1    | GO:0097266 | MF | 1 | GO:0070469 | CC | 1    |
| GO:0050622 | MF | 1 | GO:0015710 | BP | 1 | GO:0006835 | BP | 1    | GO:0003864 | MF | 1 | GO:0036125 | CC | 1    |
| GO:0046961 | MF | 1 | GO:0044873 | BP | 1 | GO:0006284 | BP | 1    | GO:0008820 | MF | 1 | GO:0070069 | CC | 1    |
| GO:0008695 | MF | 1 | GO:0006259 | BP | 1 | GO:0046278 | BP | 1    | GO:0004362 | MF | 1 | GO:0009358 | CC | 1    |
| GO:0004814 | MF | 1 | GO:1901137 | BP | 1 | GO:0043902 | BP | 1    | GO:0018576 | MF | 1 | GO:0015627 | CC | 1    |
| GO:0004794 | MF | 1 | GO:0044262 | BP | 1 | GO:0009254 | BP | 1    | GO:0050021 | MF | 1 | GO:0032991 | CC | 1    |
| GO:0004032 | MF | 1 | GO:0097428 | BP | 1 | GO:0000967 | BP | 1    | GO:0050566 | MF | 1 | GO:0009522 | CC | 1    |
| GO:0030973 | MF | 1 | GO:0101030 | BP | 1 | GO:0001762 | BP | 1    | GO:0008760 | MF | 1 | GO:0042788 | CC | 1    |
| GO:0043885 | MF | 1 | GO:0046680 | BP | 1 | GO:0009117 | BP | 1    | GO:0004366 | MF | 1 | GO:0032300 | CC | 1    |
| GO:0009022 | MF | 1 | GO:2000186 | BP | 1 | GO:0006306 | BP | 1    | GO:0004848 | MF | 1 | GO:0019898 | CC | 1    |
| GO:0016624 | MF | 1 | GO:0000105 | BP | 1 | GO:0009877 | BP | 1    | GO:0004749 | MF | 1 | GO:0098796 | CC | 1    |
| GO:0047091 | MF | 1 | GO:0051782 | BP | 1 | GO:0006529 | BP | 1    | GO:0008883 | MF | 1 | GO:0048476 | CC | 1    |
| GO:0004523 | MF | 1 | GO:0001123 | BP | 1 | GO:0042262 | BP | 1    | GO:0000310 | MF | 1 | GO:0009276 | CC | 1    |
| GO:0052739 | MF | 1 | GO:0010921 | BP | 1 | GO:0006829 | BP | 1    | GO:0008997 | MF | 1 | GO:0009349 | CC | 1    |
| GO:0016159 | MF | 1 | GO:0006547 | BP | 1 | GO:0043639 | BP | 1    | GO:0043333 | MF | 1 | GO:0000787 | CC | 1    |
| GO:0051082 | MF | 1 | GO:0002136 | BP | 1 | GO:0042952 | BP | 1    | GO:0047512 | MF | 1 | GO:0031004 | CC | 1    |
| GO:0016841 | MF | 1 | GO:0046496 | BP | 1 | GO:0046292 | BP | 1    | GO:0008661 | MF | 1 | GO:1990196 | CC | 1    |
| GO:0009378 | MF | 1 | GO:0009851 | BP | 1 | GO:0009267 | BP | 1    | GO:0008934 | MF | 1 | GO:0009337 | CC | 1    |
| GO:0004152 | MF | 1 | GO:0006189 | BP | 1 | GO:0010043 | BP | 1    | GO:0004361 | MF | 1 | GO:0098797 | CC | 1    |
| GO:0044667 | MF | 1 | GO:0015912 | BP | 1 | GO:0071978 | BP | 1    | GO:0010326 | MF | 1 | GO:0009366 | CC | 1    |
| GO:0004630 | MF | 1 | GO:0019516 | BP | 1 | GO:0010212 | BP | 1    | GO:0004124 | MF | 1 | GO:0016787 | MF | 0.02 |
| GO:0004553 | MF | 1 | GO:0019570 | BP | 1 | GO:0016021 | CC | 0.07 | GO:0008867 | MF | 1 | GO:0003735 | MF | 0.34 |
| GO:0004749 | MF | 1 | GO:0030632 | BP | 1 | GO:0005840 | CC | 1    | GO:0033877 | MF | 1 | GO:0003824 | MF | 0.52 |
| GO:0015489 | MF | 1 | GO:0010438 | BP | 1 | GO:0005694 | CC | 1    | GO:0043856 | MF | 1 | GO:0016740 | MF | 0.79 |
| GO:0102264 | MF | 1 | GO:0006835 | BP | 1 | GO:1990063 | CC | 1    | GO:0102223 | MF | 1 | GO:0019843 | MF | 1    |
| GO:0051500 | MF | 1 | GO:0000917 | BP | 1 | GO:0043684 | CC | 1    | GO:0004635 | MF | 1 | GO:0005525 | MF | 1    |

|            |    |   |            |    |      |            |    |   |            |    |   |            |    |   |
|------------|----|---|------------|----|------|------------|----|---|------------|----|---|------------|----|---|
| GO:0015499 | MF | 1 | GO:0006284 | BP | 1    | GO:0045281 | CC | 1 | GO:0005315 | MF | 1 | GO:0008168 | MF | 1 |
| GO:0009383 | MF | 1 | GO:0046278 | BP | 1    | GO:0009379 | CC | 1 | GO:0051992 | MF | 1 | GO:0016829 | MF | 1 |
| GO:0003882 | MF | 1 | GO:0043902 | BP | 1    | GO:0045239 | CC | 1 | GO:0047516 | MF | 1 | GO:0008080 | MF | 1 |
| GO:0008953 | MF | 1 | GO:0009254 | BP | 1    | GO:0005576 | CC | 1 | GO:0052657 | MF | 1 | GO:0016746 | MF | 1 |
| GO:0050355 | MF | 1 | GO:0000967 | BP | 1    | GO:0005739 | CC | 1 | GO:0004318 | MF | 1 | GO:0051213 | MF | 1 |
| GO:0004414 | MF | 1 | GO:0001762 | BP | 1    | GO:0009331 | CC | 1 | GO:0016779 | MF | 1 | GO:0008233 | MF | 1 |
| GO:0030366 | MF | 1 | GO:0009117 | BP | 1    | GO:0019008 | CC | 1 | GO:0009383 | MF | 1 | GO:0003723 | MF | 1 |
| GO:0009001 | MF | 1 | GO:0006306 | BP | 1    | GO:0005971 | CC | 1 | GO:0009007 | MF | 1 | GO:0051539 | MF | 1 |
| GO:1901359 | MF | 1 | GO:0009877 | BP | 1    | GO:0005759 | CC | 1 | GO:0016743 | MF | 1 | GO:0000155 | MF | 1 |
| GO:0008873 | MF | 1 | GO:0006529 | BP | 1    | GO:0009898 | CC | 1 | GO:0008559 | MF | 1 | GO:0016620 | MF | 1 |
| GO:0016758 | MF | 1 | GO:0042262 | BP | 1    | GO:0009330 | CC | 1 | GO:0050077 | MF | 1 | GO:0004519 | MF | 1 |
| GO:0004057 | MF | 1 | GO:0006829 | BP | 1    | GO:0045282 | CC | 1 | GO:0015099 | MF | 1 | GO:0003924 | MF | 1 |
| GO:0052589 | MF | 1 | GO:0043639 | BP | 1    | GO:0022627 | CC | 1 | GO:0033856 | MF | 1 | GO:0003676 | MF | 1 |
| GO:0043907 | MF | 1 | GO:0042952 | BP | 1    | GO:0015935 | CC | 1 | GO:0019143 | MF | 1 | GO:0008270 | MF | 1 |
| GO:0008964 | MF | 1 | GO:0046292 | BP | 1    | GO:0009289 | CC | 1 | GO:0004620 | MF | 1 | GO:0001108 | MF | 1 |
| GO:0004079 | MF | 1 | GO:0009267 | BP | 1    | GO:0031234 | CC | 1 | GO:0047602 | MF | 1 | GO:0099620 | MF | 1 |
| GO:0008690 | MF | 1 | GO:0010043 | BP | 1    | GO:0009321 | CC | 1 | GO:0009017 | MF | 1 | GO:0004597 | MF | 1 |
| GO:0043879 | MF | 1 | GO:0071978 | BP | 1    | GO:1990351 | CC | 1 | GO:0034028 | MF | 1 | GO:0034023 | MF | 1 |
| GO:0004737 | MF | 1 | GO:0010212 | BP | 1    | GO:0033202 | CC | 1 | GO:0015125 | MF | 1 | GO:0008673 | MF | 1 |
| GO:0003939 | MF | 1 | GO:0016021 | CC | 0.40 | GO:0046930 | CC | 1 | GO:0004365 | MF | 1 | GO:0004400 | MF | 1 |
| GO:0005047 | MF | 1 | GO:0005737 | CC | 1    | GO:0031160 | CC | 1 | GO:0047614 | MF | 1 | GO:0016149 | MF | 1 |
| GO:0004826 | MF | 1 | GO:0005840 | CC | 1    | GO:0055052 | CC | 1 | GO:0008906 | MF | 1 | GO:0008670 | MF | 1 |
| GO:0015210 | MF | 1 | GO:0005694 | CC | 1    | GO:0005960 | CC | 1 | GO:0000721 | MF | 1 | GO:0008791 | MF | 1 |
| GO:0047545 | MF | 1 | GO:1990063 | CC | 1    | GO:0042651 | CC | 1 | GO:0004155 | MF | 1 | GO:0047304 | MF | 1 |
| GO:0030429 | MF | 1 | GO:0043684 | CC | 1    | GO:0046658 | CC | 1 | GO:0004850 | MF | 1 | GO:0042132 | MF | 1 |
| GO:0004795 | MF | 1 | GO:0045281 | CC | 1    | GO:0019867 | CC | 1 | GO:0015095 | MF | 1 | GO:0004312 | MF | 1 |
| GO:0016149 | MF | 1 | GO:0009379 | CC | 1    | GO:0009326 | CC | 1 | GO:0004568 | MF | 1 | GO:0043531 | MF | 1 |
| GO:0015093 | MF | 1 | GO:0045239 | CC | 1    | GO:0005948 | CC | 1 | GO:0004017 | MF | 1 | GO:0052381 | MF | 1 |
| GO:0052928 | MF | 1 | GO:0005576 | CC | 1    | GO:0009360 | CC | 1 | GO:0018771 | MF | 1 | GO:0047930 | MF | 1 |
| GO:0015667 | MF | 1 | GO:0005739 | CC | 1    | GO:1990220 | CC | 1 | GO:0043879 | MF | 1 | GO:0097367 | MF | 1 |
| GO:0008800 | MF | 1 | GO:0009331 | CC | 1    | GO:0045203 | CC | 1 | GO:0050060 | MF | 1 | GO:0052595 | MF | 1 |
| GO:0008271 | MF | 1 | GO:0019008 | CC | 1    | GO:0048500 | CC | 1 | GO:0008701 | MF | 1 | GO:0008783 | MF | 1 |
| GO:0016765 | MF | 1 | GO:0005971 | CC | 1    | GO:0044096 | CC | 1 | GO:0003938 | MF | 1 | GO:0047472 | MF | 1 |
| GO:0004592 | MF | 1 | GO:0030964 | CC | 1    | GO:0031522 | CC | 1 | GO:0003796 | MF | 1 | GO:0016672 | MF | 1 |
| GO:0018740 | MF | 1 | GO:0005759 | CC | 1    | GO:1990077 | CC | 1 | GO:0015098 | MF | 1 | GO:0015209 | MF | 1 |
| GO:0042925 | MF | 1 | GO:0009898 | CC | 1    | GO:0008076 | CC | 1 | GO:0015658 | MF | 1 | GO:0016041 | MF | 1 |
| GO:0017108 | MF | 1 | GO:0009330 | CC | 1    | GO:0045263 | CC | 1 | GO:1903425 | MF | 1 | GO:0003871 | MF | 1 |
| GO:0047653 | MF | 1 | GO:0045282 | CC | 1    | GO:1990904 | CC | 1 | GO:0008758 | MF | 1 | GO:0004725 | MF | 1 |
| GO:0008867 | MF | 1 | GO:0022627 | CC | 1    | GO:0005615 | CC | 1 | GO:0008667 | MF | 1 | GO:0004169 | MF | 1 |
| GO:0004065 | MF | 1 | GO:0015935 | CC | 1    | GO:1990230 | CC | 1 | GO:0018506 | MF | 1 | GO:0050311 | MF | 1 |
| GO:0089715 | MF | 1 | GO:0043190 | CC | 1    | GO:0031230 | CC | 1 | GO:0004808 | MF | 1 | GO:0004462 | MF | 1 |
| GO:0052823 | MF | 1 | GO:0009289 | CC | 1    | GO:0000015 | CC | 1 | GO:0004096 | MF | 1 | GO:0050299 | MF | 1 |
| GO:0018774 | MF | 1 | GO:0031234 | CC | 1    | GO:0009338 | CC | 1 | GO:0034353 | MF | 1 | GO:0008236 | MF | 1 |
| GO:0004308 | MF | 1 | GO:0009321 | CC | 1    | GO:0022625 | CC | 1 | GO:0004665 | MF | 1 | GO:0004081 | MF | 1 |
| GO:0050446 | MF | 1 | GO:1990351 | CC | 1    | GO:0043590 | CC | 1 | GO:0009009 | MF | 1 | GO:0004618 | MF | 1 |

|            |    |   |            |    |   |            |    |   |            |    |   |            |    |   |
|------------|----|---|------------|----|---|------------|----|---|------------|----|---|------------|----|---|
| GO:0002935 | MF | 1 | GO:0033202 | CC | 1 | GO:0005835 | CC | 1 | GO:0008750 | MF | 1 | GO:0004152 | MF | 1 |
| GO:0034353 | MF | 1 | GO:0046930 | CC | 1 | GO:0031421 | CC | 1 | GO:0015415 | MF | 1 | GO:0002083 | MF | 1 |
| GO:0070733 | MF | 1 | GO:0031160 | CC | 1 | GO:0030956 | CC | 1 | GO:0046914 | MF | 1 | GO:0004039 | MF | 1 |
| GO:0008408 | MF | 1 | GO:0055052 | CC | 1 | GO:0009316 | CC | 1 | GO:0016880 | MF | 1 | GO:0000034 | MF | 1 |
| GO:0004822 | MF | 1 | GO:0005960 | CC | 1 | GO:0009380 | CC | 1 | GO:0034338 | MF | 1 | GO:0016034 | MF | 1 |
| GO:0033817 | MF | 1 | GO:0042651 | CC | 1 | GO:1990281 | CC | 1 | GO:0004000 | MF | 1 | GO:0008726 | MF | 1 |
| GO:0008170 | MF | 1 | GO:0046658 | CC | 1 | GO:0030428 | CC | 1 | GO:0004827 | MF | 1 | GO:0004252 | MF | 1 |
| GO:0003935 | MF | 1 | GO:0019867 | CC | 1 | GO:0009986 | CC | 1 | GO:0008834 | MF | 1 | GO:0004654 | MF | 1 |
| GO:0034909 | MF | 1 | GO:0009326 | CC | 1 | GO:0030430 | CC | 1 | GO:0004798 | MF | 1 | GO:0018581 | MF | 1 |
| GO:0004801 | MF | 1 | GO:0005948 | CC | 1 | GO:0045254 | CC | 1 | GO:0018509 | MF | 1 | GO:0004765 | MF | 1 |
| GO:0018771 | MF | 1 | GO:0009360 | CC | 1 | GO:0005856 | CC | 1 | GO:0008773 | MF | 1 | GO:0046537 | MF | 1 |
| GO:0008855 | MF | 1 | GO:1990220 | CC | 1 | GO:0052718 | CC | 1 | GO:0008460 | MF | 1 | GO:0004416 | MF | 1 |
| GO:0102388 | MF | 1 | GO:0045203 | CC | 1 | GO:0009368 | CC | 1 | GO:0016799 | MF | 1 | GO:0004044 | MF | 1 |
| GO:0034979 | MF | 1 | GO:0048500 | CC | 1 | GO:0005839 | CC | 1 | GO:0018850 | MF | 1 | GO:0004731 | MF | 1 |
| GO:0003857 | MF | 1 | GO:0044096 | CC | 1 | GO:0030256 | CC | 1 | GO:0102542 | MF | 1 | GO:0008829 | MF | 1 |
| GO:0044318 | MF | 1 | GO:0031522 | CC | 1 | GO:0015934 | CC | 1 | GO:0004343 | MF | 1 | GO:0015661 | MF | 1 |
| GO:0018669 | MF | 1 | GO:1990077 | CC | 1 | GO:0033650 | CC | 1 | GO:0042602 | MF | 1 | GO:1901681 | MF | 1 |
| GO:0015638 | MF | 1 | GO:0008076 | CC | 1 | GO:0009295 | CC | 1 | GO:0070335 | MF | 1 | GO:0004160 | MF | 1 |
| GO:0047745 | MF | 1 | GO:0045263 | CC | 1 | GO:0070088 | CC | 1 | GO:0010340 | MF | 1 | GO:0043907 | MF | 1 |
| GO:0016166 | MF | 1 | GO:1990904 | CC | 1 | GO:0009317 | CC | 1 | GO:0004789 | MF | 1 | GO:0018525 | MF | 1 |
| GO:0004144 | MF | 1 | GO:0005615 | CC | 1 | GO:0009318 | CC | 1 | GO:0008495 | MF | 1 | GO:0015930 | MF | 1 |
| GO:0004850 | MF | 1 | GO:1990230 | CC | 1 | GO:0030894 | CC | 1 | GO:0030060 | MF | 1 | GO:0004424 | MF | 1 |
| GO:0032267 | MF | 1 | GO:0031230 | CC | 1 | GO:0036405 | CC | 1 | GO:0004035 | MF | 1 | GO:0003857 | MF | 1 |
| GO:0051073 | MF | 1 | GO:0000015 | CC | 1 | GO:0034707 | CC | 1 | GO:0035529 | MF | 1 | GO:0000309 | MF | 1 |
| GO:0046429 | MF | 1 | GO:0009338 | CC | 1 | GO:0045252 | CC | 1 | GO:0004821 | MF | 1 | GO:0070573 | MF | 1 |
| GO:0052906 | MF | 1 | GO:0009274 | CC | 1 | GO:0044164 | CC | 1 | GO:0003983 | MF | 1 | GO:0015221 | MF | 1 |
| GO:0004072 | MF | 1 | GO:0022625 | CC | 1 | GO:0009376 | CC | 1 | GO:0008716 | MF | 1 | GO:0004751 | MF | 1 |
| GO:0071424 | MF | 1 | GO:0043590 | CC | 1 | GO:0097347 | CC | 1 | GO:0018489 | MF | 1 | GO:0015288 | MF | 1 |
| GO:0003959 | MF | 1 | GO:0005835 | CC | 1 | GO:1990228 | CC | 1 | GO:0008176 | MF | 1 | GO:0004838 | MF | 1 |
| GO:0036361 | MF | 1 | GO:0031421 | CC | 1 | GO:0071575 | CC | 1 | GO:0015419 | MF | 1 | GO:0047745 | MF | 1 |
| GO:0008239 | MF | 1 | GO:0009316 | CC | 1 | GO:0044776 | CC | 1 | GO:0008479 | MF | 1 | GO:1990002 | MF | 1 |
| GO:0016884 | MF | 1 | GO:0009380 | CC | 1 | GO:0045261 | CC | 1 | GO:0035410 | MF | 1 | GO:0004177 | MF | 1 |
| GO:0052833 | MF | 1 | GO:1990281 | CC | 1 | GO:0099513 | CC | 1 | GO:0004474 | MF | 1 | GO:0004642 | MF | 1 |
| GO:0103045 | MF | 1 | GO:0030428 | CC | 1 | GO:0031012 | CC | 1 | GO:0052914 | MF | 1 | GO:0016661 | MF | 1 |
| GO:0008761 | MF | 1 | GO:0009986 | CC | 1 | GO:0070469 | CC | 1 | GO:0016783 | MF | 1 | GO:0102543 | MF | 1 |
| GO:0043785 | MF | 1 | GO:0030430 | CC | 1 | GO:0031246 | CC | 1 | GO:0036221 | MF | 1 | GO:0052665 | MF | 1 |
| GO:0016701 | MF | 1 | GO:0045254 | CC | 1 | GO:0036125 | CC | 1 | GO:0036348 | MF | 1 | GO:0019003 | MF | 1 |
| GO:0050136 | MF | 1 | GO:0005856 | CC | 1 | GO:0070069 | CC | 1 | GO:0008235 | MF | 1 | GO:0015633 | MF | 1 |
| GO:0004775 | MF | 1 | GO:0052718 | CC | 1 | GO:0009358 | CC | 1 | GO:0003858 | MF | 1 | GO:0004413 | MF | 1 |
| GO:0008821 | MF | 1 | GO:0009368 | CC | 1 | GO:0032991 | CC | 1 | GO:0044374 | MF | 1 | GO:0004585 | MF | 1 |
| GO:0003883 | MF | 1 | GO:0005839 | CC | 1 | GO:0009522 | CC | 1 | GO:0004066 | MF | 1 | GO:0008757 | MF | 1 |
| GO:0008237 | MF | 1 | GO:0030256 | CC | 1 | GO:0005618 | CC | 1 | GO:0008688 | MF | 1 | GO:0052908 | MF | 1 |
| GO:0050415 | MF | 1 | GO:0015934 | CC | 1 | GO:0042788 | CC | 1 | GO:0004713 | MF | 1 | GO:0004845 | MF | 1 |
| GO:0036220 | MF | 1 | GO:0033650 | CC | 1 | GO:0032300 | CC | 1 | GO:0005291 | MF | 1 | GO:0004750 | MF | 1 |
| GO:0003906 | MF | 1 | GO:0009295 | CC | 1 | GO:0019897 | CC | 1 | GO:0015648 | MF | 1 | GO:0015218 | MF | 1 |

|            |    |   |            |    |   |            |    |     |            |    |   |            |    |   |
|------------|----|---|------------|----|---|------------|----|-----|------------|----|---|------------|----|---|
| GO:0046820 | MF | 1 | GO:0070088 | CC | 1 | GO:0019898 | CC | 1   | GO:0015250 | MF | 1 | GO:0008909 | MF | 1 |
| GO:0047930 | MF | 1 | GO:0009317 | CC | 1 | GO:0098796 | CC | 1   | GO:0102568 | MF | 1 | GO:0050608 | MF | 1 |
| GO:0016614 | MF | 1 | GO:0009318 | CC | 1 | GO:0048476 | CC | 1   | GO:0008902 | MF | 1 | GO:0004308 | MF | 1 |
| GO:0004808 | MF | 1 | GO:0030894 | CC | 1 | GO:0009276 | CC | 1   | GO:0004427 | MF | 1 | GO:0103111 | MF | 1 |
| GO:0016872 | MF | 1 | GO:0036405 | CC | 1 | GO:0009349 | CC | 1   | GO:0016765 | MF | 1 | GO:0052621 | MF | 1 |
| GO:0008296 | MF | 1 | GO:0034707 | CC | 1 | GO:0009279 | CC | 1   | GO:0042277 | MF | 1 | GO:0047280 | MF | 1 |
| GO:0052665 | MF | 1 | GO:0045252 | CC | 1 | GO:0000787 | CC | 1   | GO:0015128 | MF | 1 | GO:0016208 | MF | 1 |
| GO:0004620 | MF | 1 | GO:0044164 | CC | 1 | GO:0031004 | CC | 1   | GO:0015075 | MF | 1 | GO:0008410 | MF | 1 |
| GO:0004022 | MF | 1 | GO:0031226 | CC | 1 | GO:1990196 | CC | 1   | GO:0004622 | MF | 1 | GO:0008767 | MF | 1 |
| GO:0050555 | MF | 1 | GO:0009376 | CC | 1 | GO:0009337 | CC | 1   | GO:0016896 | MF | 1 | GO:0031418 | MF | 1 |
| GO:0008412 | MF | 1 | GO:0097347 | CC | 1 | GO:0098797 | CC | 1   | GO:0045152 | MF | 1 | GO:0008679 | MF | 1 |
| GO:0102567 | MF | 1 | GO:0032153 | CC | 1 | GO:0009366 | CC | 1   | GO:0019104 | MF | 1 | GO:0018620 | MF | 1 |
| GO:0016863 | MF | 1 | GO:1990228 | CC | 1 | GO:0016787 | MF | 0.8 | GO:0016706 | MF | 1 | GO:0043885 | MF | 1 |
| GO:0003909 | MF | 1 | GO:0071575 | CC | 1 | GO:0016740 | MF | 1   | GO:0016639 | MF | 1 | GO:0004609 | MF | 1 |
| GO:0018525 | MF | 1 | GO:0044776 | CC | 1 | GO:0003824 | MF | 1   | GO:0035527 | MF | 1 | GO:0050061 | MF | 1 |
| GO:0047949 | MF | 1 | GO:0045261 | CC | 1 | GO:0003735 | MF | 1   | GO:0050446 | MF | 1 | GO:0008910 | MF | 1 |
| GO:0004633 | MF | 1 | GO:0099513 | CC | 1 | GO:0003723 | MF | 1   | GO:0070006 | MF | 1 | GO:0005542 | MF | 1 |
| GO:0045551 | MF | 1 | GO:0031012 | CC | 1 | GO:0009055 | MF | 1   | GO:0018658 | MF | 1 | GO:0008413 | MF | 1 |
| GO:0050093 | MF | 1 | GO:0045272 | CC | 1 | GO:0019843 | MF | 1   | GO:0050100 | MF | 1 | GO:0003934 | MF | 1 |
| GO:0008802 | MF | 1 | GO:0070469 | CC | 1 | GO:0051539 | MF | 1   | GO:0004088 | MF | 1 | GO:0008775 | MF | 1 |
| GO:0003961 | MF | 1 | GO:0031246 | CC | 1 | GO:0022857 | MF | 1   | GO:0106008 | MF | 1 | GO:0097266 | MF | 1 |
| GO:0052717 | MF | 1 | GO:0036125 | CC | 1 | GO:0001108 | MF | 1   | GO:0034480 | MF | 1 | GO:0003864 | MF | 1 |
| GO:0004017 | MF | 1 | GO:0070069 | CC | 1 | GO:0099620 | MF | 1   | GO:0004719 | MF | 1 | GO:0008820 | MF | 1 |
| GO:0035596 | MF | 1 | GO:0009358 | CC | 1 | GO:0004597 | MF | 1   | GO:0047372 | MF | 1 | GO:0003755 | MF | 1 |
| GO:0002020 | MF | 1 | GO:0015627 | CC | 1 | GO:0034023 | MF | 1   | GO:0018578 | MF | 1 | GO:0004362 | MF | 1 |
| GO:0050567 | MF | 1 | GO:0032991 | CC | 1 | GO:0008673 | MF | 1   | GO:0047116 | MF | 1 | GO:0018576 | MF | 1 |
| GO:0003852 | MF | 1 | GO:0009522 | CC | 1 | GO:0004400 | MF | 1   | GO:0003991 | MF | 1 | GO:0050021 | MF | 1 |
| GO:0031418 | MF | 1 | GO:0005618 | CC | 1 | GO:0016149 | MF | 1   | GO:0008860 | MF | 1 | GO:0050566 | MF | 1 |
| GO:0004604 | MF | 1 | GO:0042788 | CC | 1 | GO:0043295 | MF | 1   | GO:0050897 | MF | 1 | GO:0008760 | MF | 1 |
| GO:0047693 | MF | 1 | GO:0032300 | CC | 1 | GO:0008670 | MF | 1   | GO:0032267 | MF | 1 | GO:0004366 | MF | 1 |
| GO:0016776 | MF | 1 | GO:0019897 | CC | 1 | GO:0008791 | MF | 1   | GO:0008837 | MF | 1 | GO:0004848 | MF | 1 |
| GO:0004030 | MF | 1 | GO:0019898 | CC | 1 | GO:0047304 | MF | 1   | GO:0016213 | MF | 1 | GO:0016874 | MF | 1 |
| GO:0047200 | MF | 1 | GO:0098796 | CC | 1 | GO:0042132 | MF | 1   | GO:0102567 | MF | 1 | GO:0004749 | MF | 1 |
| GO:0004055 | MF | 1 | GO:0048476 | CC | 1 | GO:0004312 | MF | 1   | GO:0016855 | MF | 1 | GO:0008883 | MF | 1 |
| GO:0036524 | MF | 1 | GO:0009276 | CC | 1 | GO:0043531 | MF | 1   | GO:0047443 | MF | 1 | GO:0000310 | MF | 1 |
| GO:0071916 | MF | 1 | GO:0009349 | CC | 1 | GO:0052381 | MF | 1   | GO:0001017 | MF | 1 | GO:0008997 | MF | 1 |
| GO:0016783 | MF | 1 | GO:0000787 | CC | 1 | GO:0047930 | MF | 1   | GO:0008794 | MF | 1 | GO:0043333 | MF | 1 |
| GO:0033877 | MF | 1 | GO:0031004 | CC | 1 | GO:0097367 | MF | 1   | GO:0004823 | MF | 1 | GO:0047512 | MF | 1 |
| GO:0004170 | MF | 1 | GO:0005634 | CC | 1 | GO:0004791 | MF | 1   | GO:0043842 | MF | 1 | GO:0008661 | MF | 1 |
| GO:0004568 | MF | 1 | GO:1990196 | CC | 1 | GO:0052595 | MF | 1   | GO:0061799 | MF | 1 | GO:0008934 | MF | 1 |
| GO:0004140 | MF | 1 | GO:0009337 | CC | 1 | GO:0008783 | MF | 1   | GO:0008832 | MF | 1 | GO:0004361 | MF | 1 |
| GO:0000179 | MF | 1 | GO:0098797 | CC | 1 | GO:0047472 | MF | 1   | GO:0102148 | MF | 1 | GO:0010326 | MF | 1 |
| GO:0018785 | MF | 1 | GO:0009366 | CC | 1 | GO:0016672 | MF | 1   | GO:0015187 | MF | 1 | GO:0004124 | MF | 1 |
| GO:0008941 | MF | 1 | GO:0016787 | MF | 1 | GO:0015209 | MF | 1   | GO:0016624 | MF | 1 | GO:0008867 | MF | 1 |
| GO:0035410 | MF | 1 | GO:0016740 | MF | 1 | GO:0016041 | MF | 1   | GO:0003935 | MF | 1 | GO:0033877 | MF | 1 |

|            |    |   |            |    |   |            |    |   |            |    |   |            |    |   |
|------------|----|---|------------|----|---|------------|----|---|------------|----|---|------------|----|---|
| GO:0036307 | MF | 1 | GO:0003824 | MF | 1 | GO:0003871 | MF | 1 | GO:0016463 | MF | 1 | GO:0043856 | MF | 1 |
| GO:0004127 | MF | 1 | GO:0003735 | MF | 1 | GO:0004725 | MF | 1 | GO:0008812 | MF | 1 | GO:0008776 | MF | 1 |
| GO:0050077 | MF | 1 | GO:0003700 | MF | 1 | GO:0004169 | MF | 1 | GO:0004056 | MF | 1 | GO:0102223 | MF | 1 |
| GO:0008666 | MF | 1 | GO:0003723 | MF | 1 | GO:0050311 | MF | 1 | GO:0050417 | MF | 1 | GO:0004635 | MF | 1 |
| GO:0030983 | MF | 1 | GO:0030170 | MF | 1 | GO:0004462 | MF | 1 | GO:0015291 | MF | 1 | GO:0005315 | MF | 1 |
| GO:0004815 | MF | 1 | GO:0019843 | MF | 1 | GO:0050299 | MF | 1 | GO:0008765 | MF | 1 | GO:0051992 | MF | 1 |
| GO:0016691 | MF | 1 | GO:0051539 | MF | 1 | GO:0008236 | MF | 1 | GO:0009035 | MF | 1 | GO:0047516 | MF | 1 |
| GO:0004623 | MF | 1 | GO:0001108 | MF | 1 | GO:0004081 | MF | 1 | GO:0016830 | MF | 1 | GO:0052657 | MF | 1 |
| GO:0018576 | MF | 1 | GO:0099620 | MF | 1 | GO:0004618 | MF | 1 | GO:0008941 | MF | 1 | GO:0004318 | MF | 1 |
| GO:0008780 | MF | 1 | GO:0004597 | MF | 1 | GO:0004152 | MF | 1 | GO:0008940 | MF | 1 | GO:0016779 | MF | 1 |
| GO:0004784 | MF | 1 | GO:0034023 | MF | 1 | GO:0002083 | MF | 1 | GO:0032843 | MF | 1 | GO:0009383 | MF | 1 |
| GO:0004066 | MF | 1 | GO:0008673 | MF | 1 | GO:0004039 | MF | 1 | GO:0042380 | MF | 1 | GO:0009007 | MF | 1 |
| GO:0002134 | MF | 1 | GO:0004400 | MF | 1 | GO:0000034 | MF | 1 | GO:0016791 | MF | 1 | GO:0016743 | MF | 1 |
| GO:0016726 | MF | 1 | GO:0016149 | MF | 1 | GO:0016034 | MF | 1 | GO:0016701 | MF | 1 | GO:0008559 | MF | 1 |
| GO:0004149 | MF | 1 | GO:0043295 | MF | 1 | GO:0008726 | MF | 1 | GO:0052928 | MF | 1 | GO:0050077 | MF | 1 |
| GO:0004115 | MF | 1 | GO:0008670 | MF | 1 | GO:0004252 | MF | 1 | GO:0008425 | MF | 1 | GO:0015099 | MF | 1 |
| GO:0008758 | MF | 1 | GO:0008791 | MF | 1 | GO:0004654 | MF | 1 | GO:0009001 | MF | 1 | GO:0033856 | MF | 1 |
| GO:0003862 | MF | 1 | GO:0047304 | MF | 1 | GO:0018581 | MF | 1 | GO:0047070 | MF | 1 | GO:0019143 | MF | 1 |
| GO:0018583 | MF | 1 | GO:0042132 | MF | 1 | GO:0004765 | MF | 1 | GO:0004550 | MF | 1 | GO:0004620 | MF | 1 |
| GO:0051907 | MF | 1 | GO:0004312 | MF | 1 | GO:0046537 | MF | 1 | GO:0008752 | MF | 1 | GO:0047602 | MF | 1 |
| GO:0052690 | MF | 1 | GO:0043531 | MF | 1 | GO:0004416 | MF | 1 | GO:0030983 | MF | 1 | GO:0009017 | MF | 1 |
| GO:0008860 | MF | 1 | GO:0052381 | MF | 1 | GO:0004044 | MF | 1 | GO:0000252 | MF | 1 | GO:0034028 | MF | 1 |
| GO:0046857 | MF | 1 | GO:0047930 | MF | 1 | GO:0004731 | MF | 1 | GO:0031177 | MF | 1 | GO:0015125 | MF | 1 |
| GO:0009882 | MF | 1 | GO:0097367 | MF | 1 | GO:0008829 | MF | 1 | GO:0000107 | MF | 1 | GO:0004365 | MF | 1 |
| GO:0018850 | MF | 1 | GO:0004791 | MF | 1 | GO:0015661 | MF | 1 | GO:0008690 | MF | 1 | GO:0047614 | MF | 1 |
| GO:0018480 | MF | 1 | GO:0008783 | MF | 1 | GO:1901681 | MF | 1 | GO:0009030 | MF | 1 | GO:0008906 | MF | 1 |
| GO:0008914 | MF | 1 | GO:0047472 | MF | 1 | GO:0004160 | MF | 1 | GO:0004830 | MF | 1 | GO:0000721 | MF | 1 |
| GO:0004039 | MF | 1 | GO:0016672 | MF | 1 | GO:0043907 | MF | 1 | GO:0052906 | MF | 1 | GO:0004155 | MF | 1 |
| GO:0008675 | MF | 1 | GO:0015209 | MF | 1 | GO:0033743 | MF | 1 | GO:0015097 | MF | 1 | GO:0004850 | MF | 1 |
| GO:0061605 | MF | 1 | GO:0016041 | MF | 1 | GO:0018525 | MF | 1 | GO:0004491 | MF | 1 | GO:0015095 | MF | 1 |
| GO:0008915 | MF | 1 | GO:0003871 | MF | 1 | GO:0015930 | MF | 1 | GO:0046421 | MF | 1 | GO:0004568 | MF | 1 |
| GO:0050501 | MF | 1 | GO:0004725 | MF | 1 | GO:0004424 | MF | 1 | GO:0003942 | MF | 1 | GO:0004017 | MF | 1 |
| GO:0048474 | MF | 1 | GO:0004169 | MF | 1 | GO:0003857 | MF | 1 | GO:0015138 | MF | 1 | GO:0018771 | MF | 1 |
| GO:0047425 | MF | 1 | GO:0050311 | MF | 1 | GO:0000309 | MF | 1 | GO:0004768 | MF | 1 | GO:0043879 | MF | 1 |
| GO:0004597 | MF | 1 | GO:0004462 | MF | 1 | GO:0070573 | MF | 1 | GO:0008977 | MF | 1 | GO:0050060 | MF | 1 |
| GO:0016903 | MF | 1 | GO:0050299 | MF | 1 | GO:0015221 | MF | 1 | GO:0016758 | MF | 1 | GO:0008701 | MF | 1 |
| GO:0050540 | MF | 1 | GO:0008236 | MF | 1 | GO:0004751 | MF | 1 | GO:0008412 | MF | 1 | GO:0003938 | MF | 1 |
| GO:0004638 | MF | 1 | GO:0004081 | MF | 1 | GO:0015288 | MF | 1 | GO:0046912 | MF | 1 | GO:0003796 | MF | 1 |
| GO:0004318 | MF | 1 | GO:0004618 | MF | 1 | GO:0004838 | MF | 1 | GO:0004077 | MF | 1 | GO:0015098 | MF | 1 |
| GO:0106026 | MF | 1 | GO:0004152 | MF | 1 | GO:0047745 | MF | 1 | GO:0017178 | MF | 1 | GO:0015658 | MF | 1 |
| GO:0046873 | MF | 1 | GO:0002083 | MF | 1 | GO:1990002 | MF | 1 | GO:0110153 | MF | 1 | GO:1903425 | MF | 1 |
| GO:0102223 | MF | 1 | GO:0004039 | MF | 1 | GO:0004177 | MF | 1 | GO:0018740 | MF | 1 | GO:0008758 | MF | 1 |
| GO:0016208 | MF | 1 | GO:0000034 | MF | 1 | GO:0004642 | MF | 1 | GO:0034986 | MF | 1 | GO:0008667 | MF | 1 |
| GO:0046917 | MF | 1 | GO:0016034 | MF | 1 | GO:0016661 | MF | 1 | GO:0004170 | MF | 1 | GO:0018506 | MF | 1 |
| GO:0008984 | MF | 1 | GO:0008726 | MF | 1 | GO:0015616 | MF | 1 | GO:0015450 | MF | 1 | GO:0004808 | MF | 1 |



|            |    |   |            |    |   |            |    |   |            |    |   |            |    |   |
|------------|----|---|------------|----|---|------------|----|---|------------|----|---|------------|----|---|
| GO:0008812 | MF | 1 | GO:0004252 | MF | 1 | GO:0102543 | MF | 1 | GO:0004802 | MF | 1 | GO:0004096 | MF | 1 |
| GO:0008428 | MF | 1 | GO:0004654 | MF | 1 | GO:0052665 | MF | 1 | GO:0004350 | MF | 1 | GO:0034353 | MF | 1 |
| GO:0046573 | MF | 1 | GO:0018581 | MF | 1 | GO:0003995 | MF | 1 | GO:0009014 | MF | 1 | GO:0004665 | MF | 1 |
| GO:0004424 | MF | 1 | GO:0004765 | MF | 1 | GO:0019003 | MF | 1 | GO:0015191 | MF | 1 | GO:0009009 | MF | 1 |
| GO:0008111 | MF | 1 | GO:0046537 | MF | 1 | GO:0015633 | MF | 1 | GO:0033592 | MF | 1 | GO:0008750 | MF | 1 |
| GO:0033862 | MF | 1 | GO:0004416 | MF | 1 | GO:0050567 | MF | 1 | GO:0008442 | MF | 1 | GO:0015415 | MF | 1 |
| GO:0106008 | MF | 1 | GO:0004044 | MF | 1 | GO:0004413 | MF | 1 | GO:0019152 | MF | 1 | GO:0046914 | MF | 1 |
| GO:0103068 | MF | 1 | GO:0004731 | MF | 1 | GO:0004585 | MF | 1 | GO:0008312 | MF | 1 | GO:0016880 | MF | 1 |
| GO:0015211 | MF | 1 | GO:0008829 | MF | 1 | GO:0008757 | MF | 1 | GO:0030955 | MF | 1 | GO:0034338 | MF | 1 |
| GO:0018623 | MF | 1 | GO:0015661 | MF | 1 | GO:0052908 | MF | 1 | GO:0106029 | MF | 1 | GO:0004000 | MF | 1 |
| GO:0004412 | MF | 1 | GO:1901681 | MF | 1 | GO:0004845 | MF | 1 | GO:0004392 | MF | 1 | GO:0004827 | MF | 1 |
| GO:0008521 | MF | 1 | GO:0004160 | MF | 1 | GO:0004750 | MF | 1 | GO:0004637 | MF | 1 | GO:0008834 | MF | 1 |
| GO:0102420 | MF | 1 | GO:0043907 | MF | 1 | GO:0015218 | MF | 1 | GO:0008763 | MF | 1 | GO:0004798 | MF | 1 |
| GO:0004073 | MF | 1 | GO:0018525 | MF | 1 | GO:0008909 | MF | 1 | GO:0004855 | MF | 1 | GO:0042623 | MF | 1 |
| GO:0008685 | MF | 1 | GO:0015930 | MF | 1 | GO:0050608 | MF | 1 | GO:0008551 | MF | 1 | GO:0018509 | MF | 1 |
| GO:0035438 | MF | 1 | GO:0004424 | MF | 1 | GO:0004308 | MF | 1 | GO:0050622 | MF | 1 | GO:0008773 | MF | 1 |
| GO:0102568 | MF | 1 | GO:0003857 | MF | 1 | GO:0103111 | MF | 1 | GO:0031132 | MF | 1 | GO:0000156 | MF | 1 |
| GO:0016289 | MF | 1 | GO:0000309 | MF | 1 | GO:0052621 | MF | 1 | GO:0047267 | MF | 1 | GO:0008460 | MF | 1 |
| GO:0046353 | MF | 1 | GO:0070573 | MF | 1 | GO:0047280 | MF | 1 | GO:0003868 | MF | 1 | GO:0016799 | MF | 1 |
| GO:0103117 | MF | 1 | GO:0015221 | MF | 1 | GO:0016208 | MF | 1 | GO:0003993 | MF | 1 | GO:0018850 | MF | 1 |
| GO:0015191 | MF | 1 | GO:0004751 | MF | 1 | GO:0008410 | MF | 1 | GO:0019829 | MF | 1 | GO:0102542 | MF | 1 |
| GO:0003910 | MF | 1 | GO:0015288 | MF | 1 | GO:0008767 | MF | 1 | GO:0008813 | MF | 1 | GO:0008134 | MF | 1 |
| GO:0008803 | MF | 1 | GO:0004838 | MF | 1 | GO:0031418 | MF | 1 | GO:0047580 | MF | 1 | GO:0004343 | MF | 1 |
| GO:0004385 | MF | 1 | GO:0047745 | MF | 1 | GO:0008679 | MF | 1 | GO:0015079 | MF | 1 | GO:0042602 | MF | 1 |
| GO:0004657 | MF | 1 | GO:1990002 | MF | 1 | GO:0018620 | MF | 1 | GO:0033767 | MF | 1 | GO:0070335 | MF | 1 |
| GO:0015099 | MF | 1 | GO:0004177 | MF | 1 | GO:0043885 | MF | 1 | GO:0008939 | MF | 1 | GO:0010340 | MF | 1 |
| GO:0018732 | MF | 1 | GO:0004642 | MF | 1 | GO:0004609 | MF | 1 | GO:0004328 | MF | 1 | GO:0004789 | MF | 1 |
| GO:0004725 | MF | 1 | GO:0016661 | MF | 1 | GO:0016831 | MF | 1 | GO:0000906 | MF | 1 | GO:0008495 | MF | 1 |
| GO:0004529 | MF | 1 | GO:0015616 | MF | 1 | GO:0050061 | MF | 1 | GO:0008171 | MF | 1 | GO:0030060 | MF | 1 |
| GO:0004658 | MF | 1 | GO:0102543 | MF | 1 | GO:0008233 | MF | 1 | GO:0047794 | MF | 1 | GO:0016747 | MF | 1 |
| GO:0008413 | MF | 1 | GO:0052665 | MF | 1 | GO:0008910 | MF | 1 | GO:0050136 | MF | 1 | GO:0004035 | MF | 1 |
| GO:0052911 | MF | 1 | GO:0003995 | MF | 1 | GO:0005542 | MF | 1 | GO:0015489 | MF | 1 | GO:0035529 | MF | 1 |
| GO:0008312 | MF | 1 | GO:0019003 | MF | 1 | GO:0008413 | MF | 1 | GO:0061798 | MF | 1 | GO:0004821 | MF | 1 |
| GO:0008381 | MF | 1 | GO:0015633 | MF | 1 | GO:0003934 | MF | 1 | GO:0016462 | MF | 1 | GO:0003983 | MF | 1 |
| GO:0050608 | MF | 1 | GO:0004413 | MF | 1 | GO:0008775 | MF | 1 | GO:0015501 | MF | 1 | GO:0008716 | MF | 1 |
| GO:0003986 | MF | 1 | GO:0004585 | MF | 1 | GO:0097266 | MF | 1 | GO:0102530 | MF | 1 | GO:0018489 | MF | 1 |
| GO:0070180 | MF | 1 | GO:0008757 | MF | 1 | GO:0003864 | MF | 1 | GO:0004065 | MF | 1 | GO:0008176 | MF | 1 |
| GO:0008948 | MF | 1 | GO:0052908 | MF | 1 | GO:0008820 | MF | 1 | GO:0004747 | MF | 1 | GO:0008479 | MF | 1 |
| GO:0047895 | MF | 1 | GO:0004845 | MF | 1 | GO:0003755 | MF | 1 | GO:0015276 | MF | 1 | GO:0035410 | MF | 1 |
| GO:0035527 | MF | 1 | GO:0004750 | MF | 1 | GO:0004362 | MF | 1 | GO:0004127 | MF | 1 | GO:0004474 | MF | 1 |
| GO:0004474 | MF | 1 | GO:0015218 | MF | 1 | GO:0018576 | MF | 1 | GO:0004724 | MF | 1 | GO:0052914 | MF | 1 |
| GO:0004614 | MF | 1 | GO:0008909 | MF | 1 | GO:0050021 | MF | 1 | GO:0042781 | MF | 1 | GO:0016783 | MF | 1 |
| GO:0008963 | MF | 1 | GO:0050608 | MF | 1 | GO:0050566 | MF | 1 | GO:0008721 | MF | 1 | GO:0036221 | MF | 1 |
| GO:0008794 | MF | 1 | GO:0004308 | MF | 1 | GO:0008760 | MF | 1 | GO:0004061 | MF | 1 | GO:0036348 | MF | 1 |
| GO:0050565 | MF | 1 | GO:0103111 | MF | 1 | GO:0004366 | MF | 1 | GO:0008817 | MF | 1 | GO:0008235 | MF | 1 |

|            |    |   |            |    |   |            |    |   |            |    |   |            |    |   |
|------------|----|---|------------|----|---|------------|----|---|------------|----|---|------------|----|---|
| GO:0018620 | MF | 1 | GO:0052621 | MF | 1 | GO:0004848 | MF | 1 | GO:0003861 | MF | 1 | GO:0003858 | MF | 1 |
| GO:0052923 | MF | 1 | GO:0047280 | MF | 1 | GO:0004749 | MF | 1 | GO:0015366 | MF | 1 | GO:0044374 | MF | 1 |
| GO:0047070 | MF | 1 | GO:0016208 | MF | 1 | GO:0008883 | MF | 1 | GO:0050394 | MF | 1 | GO:0004370 | MF | 1 |
| GO:0004471 | MF | 1 | GO:0008410 | MF | 1 | GO:0000310 | MF | 1 | GO:0033862 | MF | 1 | GO:0004066 | MF | 1 |
| GO:0008684 | MF | 1 | GO:0008767 | MF | 1 | GO:0008997 | MF | 1 | GO:0003879 | MF | 1 | GO:0008688 | MF | 1 |
| GO:0008886 | MF | 1 | GO:0031418 | MF | 1 | GO:0043333 | MF | 1 | GO:0070205 | MF | 1 | GO:0004713 | MF | 1 |
| GO:0070039 | MF | 1 | GO:0008679 | MF | 1 | GO:0047512 | MF | 1 | GO:0019134 | MF | 1 | GO:0005291 | MF | 1 |
| GO:0008820 | MF | 1 | GO:0018620 | MF | 1 | GO:0015386 | MF | 1 | GO:0020037 | MF | 1 | GO:0015648 | MF | 1 |
| GO:0003962 | MF | 1 | GO:0043885 | MF | 1 | GO:0008661 | MF | 1 | GO:0008990 | MF | 1 | GO:0015250 | MF | 1 |
| GO:0061603 | MF | 1 | GO:0047388 | MF | 1 | GO:0008934 | MF | 1 | GO:0003681 | MF | 1 | GO:0102568 | MF | 1 |
| GO:0003991 | MF | 1 | GO:0004609 | MF | 1 | GO:0004361 | MF | 1 | GO:0004457 | MF | 1 | GO:0008902 | MF | 1 |
| GO:0016763 | MF | 1 | GO:0016831 | MF | 1 | GO:0010326 | MF | 1 | GO:0004149 | MF | 1 | GO:0004427 | MF | 1 |
| GO:0004502 | MF | 1 | GO:0050061 | MF | 1 | GO:0004124 | MF | 1 | GO:0016837 | MF | 1 | GO:0016765 | MF | 1 |
| GO:0004457 | MF | 1 | GO:0008233 | MF | 1 | GO:0008867 | MF | 1 | GO:0004502 | MF | 1 | GO:0042277 | MF | 1 |
| GO:0047472 | MF | 1 | GO:0008910 | MF | 1 | GO:0033877 | MF | 1 | GO:0003852 | MF | 1 | GO:0015128 | MF | 1 |
| GO:0004747 | MF | 1 | GO:0005542 | MF | 1 | GO:0043856 | MF | 1 | GO:0004411 | MF | 1 | GO:0015075 | MF | 1 |
| GO:0018489 | MF | 1 | GO:0008413 | MF | 1 | GO:0008776 | MF | 1 | GO:0047004 | MF | 1 | GO:0004622 | MF | 1 |
| GO:0004045 | MF | 1 | GO:0003934 | MF | 1 | GO:0102223 | MF | 1 | GO:0008859 | MF | 1 | GO:0016896 | MF | 1 |
| GO:0015411 | MF | 1 | GO:0008775 | MF | 1 | GO:0004635 | MF | 1 | GO:0016657 | MF | 1 | GO:0045152 | MF | 1 |
| GO:0008703 | MF | 1 | GO:0097266 | MF | 1 | GO:0005315 | MF | 1 | GO:0016646 | MF | 1 | GO:0019104 | MF | 1 |
| GO:0016034 | MF | 1 | GO:0003864 | MF | 1 | GO:0051992 | MF | 1 | GO:0001671 | MF | 1 | GO:0016706 | MF | 1 |
| GO:0016671 | MF | 1 | GO:0008820 | MF | 1 | GO:0047516 | MF | 1 | GO:0004844 | MF | 1 | GO:0016639 | MF | 1 |
| GO:0003825 | MF | 1 | GO:0003755 | MF | 1 | GO:0050515 | MF | 1 | GO:0003825 | MF | 1 | GO:0035527 | MF | 1 |
| GO:0050232 | MF | 1 | GO:0004362 | MF | 1 | GO:0052657 | MF | 1 | GO:0002935 | MF | 1 | GO:0050446 | MF | 1 |
| GO:0004129 | MF | 1 | GO:0018576 | MF | 1 | GO:0004318 | MF | 1 | GO:0018482 | MF | 1 | GO:0070006 | MF | 1 |
| GO:0008773 | MF | 1 | GO:0050021 | MF | 1 | GO:0016779 | MF | 1 | GO:0015207 | MF | 1 | GO:0000006 | MF | 1 |
| GO:0003866 | MF | 1 | GO:0004817 | MF | 1 | GO:0009383 | MF | 1 | GO:0008986 | MF | 1 | GO:0018658 | MF | 1 |
| GO:0019152 | MF | 1 | GO:0050566 | MF | 1 | GO:0009007 | MF | 1 | GO:0003905 | MF | 1 | GO:0050100 | MF | 1 |
| GO:0004827 | MF | 1 | GO:0008760 | MF | 1 | GO:0016743 | MF | 1 | GO:0004784 | MF | 1 | GO:0004088 | MF | 1 |
| GO:0004177 | MF | 1 | GO:0004366 | MF | 1 | GO:0008559 | MF | 1 | GO:0047728 | MF | 1 | GO:0106008 | MF | 1 |
| GO:0008876 | MF | 1 | GO:0004848 | MF | 1 | GO:0050077 | MF | 1 | GO:0004648 | MF | 1 | GO:0008681 | MF | 1 |
| GO:0102009 | MF | 1 | GO:0016874 | MF | 1 | GO:0015099 | MF | 1 | GO:0004412 | MF | 1 | GO:0034480 | MF | 1 |
| GO:0008425 | MF | 1 | GO:0004749 | MF | 1 | GO:0033856 | MF | 1 | GO:0061599 | MF | 1 | GO:0004719 | MF | 1 |
| GO:0005280 | MF | 1 | GO:0008883 | MF | 1 | GO:0019143 | MF | 1 | GO:0001761 | MF | 1 | GO:0047372 | MF | 1 |
| GO:0045301 | MF | 1 | GO:0000310 | MF | 1 | GO:0004620 | MF | 1 | GO:0043752 | MF | 1 | GO:0018578 | MF | 1 |
| GO:0008851 | MF | 1 | GO:0008997 | MF | 1 | GO:0047602 | MF | 1 | GO:0008409 | MF | 1 | GO:0004377 | MF | 1 |
| GO:0015250 | MF | 1 | GO:0043333 | MF | 1 | GO:0009017 | MF | 1 | GO:0016153 | MF | 1 | GO:0047116 | MF | 1 |
| GO:0052381 | MF | 1 | GO:0047512 | MF | 1 | GO:0034028 | MF | 1 | GO:0047661 | MF | 1 | GO:0003991 | MF | 1 |
| GO:0043115 | MF | 1 | GO:0015386 | MF | 1 | GO:0015125 | MF | 1 | GO:0050537 | MF | 1 | GO:0008860 | MF | 1 |
| GO:0043755 | MF | 1 | GO:0008661 | MF | 1 | GO:0004365 | MF | 1 | GO:0050415 | MF | 1 | GO:0050897 | MF | 1 |
| GO:0019825 | MF | 1 | GO:0008934 | MF | 1 | GO:0047614 | MF | 1 | GO:0008138 | MF | 1 | GO:0032267 | MF | 1 |
| GO:0050300 | MF | 1 | GO:0004361 | MF | 1 | GO:0008906 | MF | 1 | GO:0035597 | MF | 1 | GO:0008887 | MF | 1 |
| GO:0003864 | MF | 1 | GO:0010326 | MF | 1 | GO:0000721 | MF | 1 | GO:0050300 | MF | 1 | GO:0008837 | MF | 1 |
| GO:0004174 | MF | 1 | GO:0004124 | MF | 1 | GO:0004155 | MF | 1 | GO:0042907 | MF | 1 | GO:0016213 | MF | 1 |
| GO:0009015 | MF | 1 | GO:0008867 | MF | 1 | GO:0004850 | MF | 1 | GO:0004813 | MF | 1 | GO:0102567 | MF | 1 |

|            |    |   |            |    |   |            |    |   |            |    |   |            |    |   |
|------------|----|---|------------|----|---|------------|----|---|------------|----|---|------------|----|---|
| GO:0047267 | MF | 1 | GO:0033877 | MF | 1 | GO:0052855 | MF | 1 | GO:0008081 | MF | 1 | GO:0016855 | MF | 1 |
| GO:1903425 | MF | 1 | GO:0043856 | MF | 1 | GO:0015095 | MF | 1 | GO:0046857 | MF | 1 | GO:0047443 | MF | 1 |
| GO:0008827 | MF | 1 | GO:0008776 | MF | 1 | GO:0004568 | MF | 1 | GO:0015190 | MF | 1 | GO:0001017 | MF | 1 |
| GO:0004114 | MF | 1 | GO:0102223 | MF | 1 | GO:0004017 | MF | 1 | GO:0102555 | MF | 1 | GO:0008794 | MF | 1 |
| GO:0009016 | MF | 1 | GO:0004635 | MF | 1 | GO:0018771 | MF | 1 | GO:0018623 | MF | 1 | GO:0004823 | MF | 1 |
| GO:0043866 | MF | 1 | GO:0005315 | MF | 1 | GO:0043879 | MF | 1 | GO:0008170 | MF | 1 | GO:0043842 | MF | 1 |
| GO:0003942 | MF | 1 | GO:0051992 | MF | 1 | GO:0050060 | MF | 1 | GO:0008199 | MF | 1 | GO:0061799 | MF | 1 |
| GO:0008782 | MF | 1 | GO:0047516 | MF | 1 | GO:0008701 | MF | 1 | GO:0015538 | MF | 1 | GO:0008832 | MF | 1 |
| GO:0047954 | MF | 1 | GO:0050515 | MF | 1 | GO:0003938 | MF | 1 | GO:0015654 | MF | 1 | GO:0102148 | MF | 1 |
| GO:0004462 | MF | 1 | GO:0052657 | MF | 1 | GO:0003796 | MF | 1 | GO:0016289 | MF | 1 | GO:0015187 | MF | 1 |
| GO:0008696 | MF | 1 | GO:0004318 | MF | 1 | GO:0015098 | MF | 1 | GO:0008704 | MF | 1 | GO:0016624 | MF | 1 |
| GO:0004834 | MF | 1 | GO:0016779 | MF | 1 | GO:0015658 | MF | 1 | GO:0004652 | MF | 1 | GO:0003935 | MF | 1 |
| GO:0004081 | MF | 1 | GO:0009383 | MF | 1 | GO:0047519 | MF | 1 | GO:0004737 | MF | 1 | GO:0016463 | MF | 1 |
| GO:0004852 | MF | 1 | GO:0009007 | MF | 1 | GO:1903425 | MF | 1 | GO:0008444 | MF | 1 | GO:0008812 | MF | 1 |
| GO:0047617 | MF | 1 | GO:0016743 | MF | 1 | GO:0008758 | MF | 1 | GO:0004145 | MF | 1 | GO:0004056 | MF | 1 |
| GO:0004337 | MF | 1 | GO:0008559 | MF | 1 | GO:0008667 | MF | 1 | GO:0015638 | MF | 1 | GO:0050417 | MF | 1 |
| GO:0005384 | MF | 1 | GO:0050077 | MF | 1 | GO:0018506 | MF | 1 | GO:0016805 | MF | 1 | GO:0015291 | MF | 1 |
| GO:1990610 | MF | 1 | GO:0008137 | MF | 1 | GO:0004808 | MF | 1 | GO:0003684 | MF | 1 | GO:0008765 | MF | 1 |
| GO:0000062 | MF | 1 | GO:0015099 | MF | 1 | GO:0004096 | MF | 1 | GO:0031402 | MF | 1 | GO:0008686 | MF | 1 |
| GO:0004739 | MF | 1 | GO:0033856 | MF | 1 | GO:0034353 | MF | 1 | GO:0032451 | MF | 1 | GO:0009035 | MF | 1 |
| GO:0005291 | MF | 1 | GO:0019143 | MF | 1 | GO:0004665 | MF | 1 | GO:0008962 | MF | 1 | GO:0016830 | MF | 1 |
| GO:0000400 | MF | 1 | GO:0004620 | MF | 1 | GO:0009009 | MF | 1 | GO:0046566 | MF | 1 | GO:0008941 | MF | 1 |
| GO:0018842 | MF | 1 | GO:0047602 | MF | 1 | GO:0008750 | MF | 1 | GO:0043917 | MF | 1 | GO:0030697 | MF | 1 |
| GO:0008138 | MF | 1 | GO:0009017 | MF | 1 | GO:0015415 | MF | 1 | GO:0003841 | MF | 1 | GO:0008940 | MF | 1 |
| GO:0004478 | MF | 1 | GO:0034028 | MF | 1 | GO:0046914 | MF | 1 | GO:0052693 | MF | 1 | GO:0032843 | MF | 1 |
| GO:0008999 | MF | 1 | GO:0015125 | MF | 1 | GO:0016880 | MF | 1 | GO:0106026 | MF | 1 | GO:0008784 | MF | 1 |
| GO:0016668 | MF | 1 | GO:0004365 | MF | 1 | GO:0034338 | MF | 1 | GO:0004322 | MF | 1 | GO:0042380 | MF | 1 |
| GO:0099620 | MF | 1 | GO:0047614 | MF | 1 | GO:0004000 | MF | 1 | GO:0005543 | MF | 1 | GO:0016791 | MF | 1 |
| GO:0008934 | MF | 1 | GO:0008906 | MF | 1 | GO:0051213 | MF | 1 | GO:0016595 | MF | 1 | GO:0016701 | MF | 1 |
| GO:0008902 | MF | 1 | GO:0000721 | MF | 1 | GO:0004827 | MF | 1 | GO:0016407 | MF | 1 | GO:0052928 | MF | 1 |
| GO:0061598 | MF | 1 | GO:0004155 | MF | 1 | GO:0008834 | MF | 1 | GO:0043908 | MF | 1 | GO:0008425 | MF | 1 |
| GO:0035312 | MF | 1 | GO:0004850 | MF | 1 | GO:0004798 | MF | 1 | GO:0050235 | MF | 1 | GO:0009001 | MF | 1 |
| GO:0050385 | MF | 1 | GO:0052855 | MF | 1 | GO:0018509 | MF | 1 | GO:0008521 | MF | 1 | GO:0047070 | MF | 1 |
| GO:0052881 | MF | 1 | GO:0015095 | MF | 1 | GO:0008773 | MF | 1 | GO:0004067 | MF | 1 | GO:0004550 | MF | 1 |
| GO:0030611 | MF | 1 | GO:0004568 | MF | 1 | GO:0000156 | MF | 1 | GO:0000908 | MF | 1 | GO:0052596 | MF | 1 |
| GO:0008556 | MF | 1 | GO:0004017 | MF | 1 | GO:0008460 | MF | 1 | GO:0018800 | MF | 1 | GO:0008752 | MF | 1 |
| GO:0018834 | MF | 1 | GO:0018771 | MF | 1 | GO:0008766 | MF | 1 | GO:0016793 | MF | 1 | GO:0030983 | MF | 1 |
| GO:0016837 | MF | 1 | GO:0043879 | MF | 1 | GO:0016799 | MF | 1 | GO:0004815 | MF | 1 | GO:0000252 | MF | 1 |
| GO:0051499 | MF | 1 | GO:0050060 | MF | 1 | GO:0018850 | MF | 1 | GO:0008774 | MF | 1 | GO:0031177 | MF | 1 |
| GO:0015226 | MF | 1 | GO:0008701 | MF | 1 | GO:0102542 | MF | 1 | GO:0034567 | MF | 1 | GO:0000107 | MF | 1 |
| GO:0008818 | MF | 1 | GO:0003938 | MF | 1 | GO:0008134 | MF | 1 | GO:0008806 | MF | 1 | GO:0008690 | MF | 1 |
| GO:0047794 | MF | 1 | GO:0003796 | MF | 1 | GO:0004343 | MF | 1 | GO:0052832 | MF | 1 | GO:0016491 | MF | 1 |
| GO:0046912 | MF | 1 | GO:0015098 | MF | 1 | GO:0042602 | MF | 1 | GO:0004825 | MF | 1 | GO:0004830 | MF | 1 |
| GO:0019171 | MF | 1 | GO:0015658 | MF | 1 | GO:0070335 | MF | 1 | GO:0004467 | MF | 1 | GO:0030267 | MF | 1 |
| GO:0043531 | MF | 1 | GO:0047519 | MF | 1 | GO:0010340 | MF | 1 | GO:0047570 | MF | 1 | GO:0052906 | MF | 1 |

|            |    |   |            |    |   |            |    |   |            |    |   |            |    |   |
|------------|----|---|------------|----|---|------------|----|---|------------|----|---|------------|----|---|
| GO:0008379 | MF | 1 | GO:1903425 | MF | 1 | GO:0004789 | MF | 1 | GO:0003724 | MF | 1 | GO:0018541 | MF | 1 |
| GO:0047407 | MF | 1 | GO:0008758 | MF | 1 | GO:0008495 | MF | 1 | GO:0051991 | MF | 1 | GO:0015097 | MF | 1 |
| GO:0008925 | MF | 1 | GO:0008667 | MF | 1 | GO:0030060 | MF | 1 | GO:0008734 | MF | 1 | GO:0009029 | MF | 1 |
| GO:0008725 | MF | 1 | GO:0018506 | MF | 1 | GO:0016747 | MF | 1 | GO:0008381 | MF | 1 | GO:0004491 | MF | 1 |
| GO:0003941 | MF | 1 | GO:0004808 | MF | 1 | GO:0004518 | MF | 1 | GO:0000210 | MF | 1 | GO:0046421 | MF | 1 |
| GO:0046537 | MF | 1 | GO:0004096 | MF | 1 | GO:0004035 | MF | 1 | GO:0016863 | MF | 1 | GO:0003942 | MF | 1 |
| GO:0030848 | MF | 1 | GO:0034353 | MF | 1 | GO:0035529 | MF | 1 | GO:0004852 | MF | 1 | GO:0015138 | MF | 1 |
| GO:0004751 | MF | 1 | GO:0004665 | MF | 1 | GO:0003963 | MF | 1 | GO:0005328 | MF | 1 | GO:0004768 | MF | 1 |
| GO:0004107 | MF | 1 | GO:0009009 | MF | 1 | GO:0004821 | MF | 1 | GO:0102007 | MF | 1 | GO:0004721 | MF | 1 |
| GO:0004451 | MF | 1 | GO:0008750 | MF | 1 | GO:0003983 | MF | 1 | GO:0017151 | MF | 1 | GO:0008977 | MF | 1 |
| GO:0032136 | MF | 1 | GO:0015415 | MF | 1 | GO:0008716 | MF | 1 | GO:0015103 | MF | 1 | GO:0016758 | MF | 1 |
| GO:0047451 | MF | 1 | GO:0046914 | MF | 1 | GO:0018489 | MF | 1 | GO:0009975 | MF | 1 | GO:0004647 | MF | 1 |
| GO:0003724 | MF | 1 | GO:0016880 | MF | 1 | GO:0008176 | MF | 1 | GO:0004605 | MF | 1 | GO:0008412 | MF | 1 |
| GO:0033818 | MF | 1 | GO:0034338 | MF | 1 | GO:0015419 | MF | 1 | GO:0016159 | MF | 1 | GO:0046912 | MF | 1 |
| GO:0047443 | MF | 1 | GO:0004000 | MF | 1 | GO:0042286 | MF | 1 | GO:0008705 | MF | 1 | GO:0004077 | MF | 1 |
| GO:0008097 | MF | 1 | GO:0051213 | MF | 1 | GO:0008479 | MF | 1 | GO:0003950 | MF | 1 | GO:0015293 | MF | 1 |
| GO:0008668 | MF | 1 | GO:0009055 | MF | 1 | GO:0035410 | MF | 1 | GO:0005298 | MF | 1 | GO:0017178 | MF | 1 |
| GO:0008774 | MF | 1 | GO:0004827 | MF | 1 | GO:0004474 | MF | 1 | GO:0090483 | MF | 1 | GO:0110153 | MF | 1 |
| GO:0004317 | MF | 1 | GO:0008834 | MF | 1 | GO:0052914 | MF | 1 | GO:0046553 | MF | 1 | GO:0018740 | MF | 1 |
| GO:0102307 | MF | 1 | GO:0004798 | MF | 1 | GO:0016783 | MF | 1 | GO:0004459 | MF | 1 | GO:0034986 | MF | 1 |
| GO:0008234 | MF | 1 | GO:0042623 | MF | 1 | GO:0036221 | MF | 1 | GO:0032549 | MF | 1 | GO:0004170 | MF | 1 |
| GO:0004350 | MF | 1 | GO:0018509 | MF | 1 | GO:0036348 | MF | 1 | GO:0003959 | MF | 1 | GO:0015450 | MF | 1 |
| GO:0052873 | MF | 1 | GO:0008773 | MF | 1 | GO:0008235 | MF | 1 | GO:0030272 | MF | 1 | GO:0004802 | MF | 1 |
| GO:0004349 | MF | 1 | GO:0000156 | MF | 1 | GO:0003858 | MF | 1 | GO:0004042 | MF | 1 | GO:0004350 | MF | 1 |
| GO:0004798 | MF | 1 | GO:0008460 | MF | 1 | GO:0044374 | MF | 1 | GO:0008933 | MF | 1 | GO:0009014 | MF | 1 |
| GO:0003842 | MF | 1 | GO:0008766 | MF | 1 | GO:0004370 | MF | 1 | GO:0017168 | MF | 1 | GO:0015191 | MF | 1 |
| GO:0008670 | MF | 1 | GO:0016799 | MF | 1 | GO:0004066 | MF | 1 | GO:0047575 | MF | 1 | GO:0033592 | MF | 1 |
| GO:0043273 | MF | 1 | GO:0018850 | MF | 1 | GO:0008688 | MF | 1 | GO:0004325 | MF | 1 | GO:0008442 | MF | 1 |
| GO:0016150 | MF | 1 | GO:0102542 | MF | 1 | GO:0004713 | MF | 1 | GO:0036220 | MF | 1 | GO:0019152 | MF | 1 |
| GO:0033897 | MF | 1 | GO:0008134 | MF | 1 | GO:0005291 | MF | 1 | GO:0004673 | MF | 1 | GO:0008312 | MF | 1 |
| GO:0052914 | MF | 1 | GO:0004343 | MF | 1 | GO:0015648 | MF | 1 | GO:0045301 | MF | 1 | GO:0030955 | MF | 1 |
| GO:0004360 | MF | 1 | GO:0042602 | MF | 1 | GO:0015250 | MF | 1 | GO:0018635 | MF | 1 | GO:0106029 | MF | 1 |
| GO:0004730 | MF | 1 | GO:0070335 | MF | 1 | GO:0102568 | MF | 1 | GO:0004592 | MF | 1 | GO:0004392 | MF | 1 |
| GO:0005542 | MF | 1 | GO:0010340 | MF | 1 | GO:0015035 | MF | 1 | GO:0042301 | MF | 1 | GO:0004637 | MF | 1 |
| GO:0015662 | MF | 1 | GO:0004789 | MF | 1 | GO:0008902 | MF | 1 | GO:0008796 | MF | 1 | GO:0008763 | MF | 1 |
| GO:0016772 | MF | 1 | GO:0008495 | MF | 1 | GO:0004427 | MF | 1 | GO:0004615 | MF | 1 | GO:0004855 | MF | 1 |
| GO:0004298 | MF | 1 | GO:0030060 | MF | 1 | GO:0016765 | MF | 1 | GO:0103045 | MF | 1 | GO:0008551 | MF | 1 |
| GO:0050061 | MF | 1 | GO:0016747 | MF | 1 | GO:0042277 | MF | 1 | GO:0017108 | MF | 1 | GO:0050622 | MF | 1 |
| GO:0018635 | MF | 1 | GO:0004035 | MF | 1 | GO:0015128 | MF | 1 | GO:0016691 | MF | 1 | GO:0031132 | MF | 1 |
| GO:0004590 | MF | 1 | GO:0035529 | MF | 1 | GO:0015075 | MF | 1 | GO:0043273 | MF | 1 | GO:0047267 | MF | 1 |
| GO:0043752 | MF | 1 | GO:0003963 | MF | 1 | GO:0004622 | MF | 1 | GO:0035438 | MF | 1 | GO:0003868 | MF | 1 |
| GO:0016223 | MF | 1 | GO:0004821 | MF | 1 | GO:0016896 | MF | 1 | GO:0070181 | MF | 1 | GO:0003993 | MF | 1 |
| GO:0015207 | MF | 1 | GO:0003983 | MF | 1 | GO:0045152 | MF | 1 | GO:0008873 | MF | 1 | GO:0019829 | MF | 1 |
| GO:0004594 | MF | 1 | GO:0008716 | MF | 1 | GO:0019104 | MF | 1 | GO:0047200 | MF | 1 | GO:0008813 | MF | 1 |
| GO:0016655 | MF | 1 | GO:0018489 | MF | 1 | GO:0016706 | MF | 1 | GO:0005253 | MF | 1 | GO:0047150 | MF | 1 |

|            |    |   |            |    |   |            |    |   |            |    |   |            |    |   |
|------------|----|---|------------|----|---|------------|----|---|------------|----|---|------------|----|---|
| GO:0004000 | MF | 1 | GO:0008176 | MF | 1 | GO:0016639 | MF | 1 | GO:0004326 | MF | 1 | GO:0047580 | MF | 1 |
| GO:0008972 | MF | 1 | GO:0015419 | MF | 1 | GO:0035527 | MF | 1 | GO:0008252 | MF | 1 | GO:0015079 | MF | 1 |
| GO:0004418 | MF | 1 | GO:0042286 | MF | 1 | GO:0050446 | MF | 1 | GO:0016742 | MF | 1 | GO:0033767 | MF | 1 |
| GO:0008832 | MF | 1 | GO:0008479 | MF | 1 | GO:0070006 | MF | 1 | GO:0015565 | MF | 1 | GO:0008939 | MF | 1 |
| GO:0047134 | MF | 1 | GO:0035410 | MF | 1 | GO:0000006 | MF | 1 | GO:0004070 | MF | 1 | GO:0004328 | MF | 1 |
| GO:0030272 | MF | 1 | GO:0004474 | MF | 1 | GO:0018658 | MF | 1 | GO:0004047 | MF | 1 | GO:0000906 | MF | 1 |
| GO:0008484 | MF | 1 | GO:0052914 | MF | 1 | GO:0050100 | MF | 1 | GO:0016279 | MF | 1 | GO:0008171 | MF | 1 |
| GO:0050511 | MF | 1 | GO:0016783 | MF | 1 | GO:0004088 | MF | 1 | GO:0008953 | MF | 1 | GO:0047794 | MF | 1 |
| GO:0042907 | MF | 1 | GO:0036221 | MF | 1 | GO:0106008 | MF | 1 | GO:0008696 | MF | 1 | GO:0050136 | MF | 1 |
| GO:0004366 | MF | 1 | GO:0036348 | MF | 1 | GO:0008681 | MF | 1 | GO:0008676 | MF | 1 | GO:0016987 | MF | 1 |
| GO:0008718 | MF | 1 | GO:0008235 | MF | 1 | GO:0034480 | MF | 1 | GO:0004165 | MF | 1 | GO:0015489 | MF | 1 |
| GO:0070205 | MF | 1 | GO:0003858 | MF | 1 | GO:0004719 | MF | 1 | GO:0015424 | MF | 1 | GO:0061798 | MF | 1 |
| GO:0070573 | MF | 1 | GO:0044374 | MF | 1 | GO:0047372 | MF | 1 | GO:0051499 | MF | 1 | GO:0016462 | MF | 1 |
| GO:0008721 | MF | 1 | GO:0004370 | MF | 1 | GO:0018578 | MF | 1 | GO:0004045 | MF | 1 | GO:0015501 | MF | 1 |
| GO:0016995 | MF | 1 | GO:0004066 | MF | 1 | GO:0018618 | MF | 1 | GO:0001512 | MF | 1 | GO:0102530 | MF | 1 |
| GO:0004831 | MF | 1 | GO:0008688 | MF | 1 | GO:0004377 | MF | 1 | GO:0018849 | MF | 1 | GO:0004065 | MF | 1 |
| GO:0001512 | MF | 1 | GO:0004713 | MF | 1 | GO:0047116 | MF | 1 | GO:0018662 | MF | 1 | GO:0004747 | MF | 1 |
| GO:0004477 | MF | 1 | GO:0005291 | MF | 1 | GO:0015129 | MF | 1 | GO:0050297 | MF | 1 | GO:0015276 | MF | 1 |
| GO:0102008 | MF | 1 | GO:0015648 | MF | 1 | GO:0003991 | MF | 1 | GO:0004115 | MF | 1 | GO:0004127 | MF | 1 |
| GO:0008898 | MF | 1 | GO:0015250 | MF | 1 | GO:0008860 | MF | 1 | GO:0051745 | MF | 1 | GO:0004724 | MF | 1 |
| GO:0005249 | MF | 1 | GO:0102568 | MF | 1 | GO:0050897 | MF | 1 | GO:0003957 | MF | 1 | GO:0050269 | MF | 1 |
| GO:0008835 | MF | 1 | GO:0015035 | MF | 1 | GO:0032267 | MF | 1 | GO:0034458 | MF | 1 | GO:0042781 | MF | 1 |
| GO:0008919 | MF | 1 | GO:0008902 | MF | 1 | GO:0008887 | MF | 1 | GO:0046353 | MF | 1 | GO:0008721 | MF | 1 |
| GO:0000014 | MF | 1 | GO:0004427 | MF | 1 | GO:0030170 | MF | 1 | GO:0030145 | MF | 1 | GO:0004061 | MF | 1 |
| GO:0008559 | MF | 1 | GO:0016765 | MF | 1 | GO:0008837 | MF | 1 | GO:0004854 | MF | 1 | GO:0008817 | MF | 1 |
| GO:0008659 | MF | 1 | GO:0042277 | MF | 1 | GO:0016213 | MF | 1 | GO:0003908 | MF | 1 | GO:0003861 | MF | 1 |
| GO:0000906 | MF | 1 | GO:0015128 | MF | 1 | GO:0102567 | MF | 1 | GO:0030371 | MF | 1 | GO:0015366 | MF | 1 |
| GO:0003977 | MF | 1 | GO:0015075 | MF | 1 | GO:0008080 | MF | 1 | GO:0004730 | MF | 1 | GO:0050394 | MF | 1 |
| GO:0050021 | MF | 1 | GO:0004622 | MF | 1 | GO:0016855 | MF | 1 | GO:0003867 | MF | 1 | GO:0033862 | MF | 1 |
| GO:0008759 | MF | 1 | GO:0016896 | MF | 1 | GO:0047443 | MF | 1 | GO:0033737 | MF | 1 | GO:0003879 | MF | 1 |
| GO:0008986 | MF | 1 | GO:0045152 | MF | 1 | GO:0001017 | MF | 1 | GO:0004488 | MF | 1 | GO:0070205 | MF | 1 |
| GO:0009975 | MF | 1 | GO:0019104 | MF | 1 | GO:0008794 | MF | 1 | GO:0004801 | MF | 1 | GO:0019134 | MF | 1 |
| GO:0097216 | MF | 1 | GO:0016706 | MF | 1 | GO:0004823 | MF | 1 | GO:0016437 | MF | 1 | GO:0046982 | MF | 1 |
| GO:0016212 | MF | 1 | GO:0016639 | MF | 1 | GO:0043842 | MF | 1 | GO:0050555 | MF | 1 | GO:0020037 | MF | 1 |
| GO:0004634 | MF | 1 | GO:0035527 | MF | 1 | GO:0061799 | MF | 1 | GO:0004352 | MF | 1 | GO:0019534 | MF | 1 |
| GO:0003886 | MF | 1 | GO:0050446 | MF | 1 | GO:0008832 | MF | 1 | GO:0008919 | MF | 1 | GO:0008990 | MF | 1 |
| GO:0047533 | MF | 1 | GO:0070006 | MF | 1 | GO:0102148 | MF | 1 | GO:0004190 | MF | 1 | GO:0003681 | MF | 1 |
| GO:0033737 | MF | 1 | GO:0000006 | MF | 1 | GO:0015187 | MF | 1 | GO:0003911 | MF | 1 | GO:0008725 | MF | 1 |
| GO:0004807 | MF | 1 | GO:0018658 | MF | 1 | GO:0016624 | MF | 1 | GO:0003849 | MF | 1 | GO:0004457 | MF | 1 |
| GO:0004635 | MF | 1 | GO:0050100 | MF | 1 | GO:0003935 | MF | 1 | GO:0004334 | MF | 1 | GO:0004149 | MF | 1 |
| GO:0103111 | MF | 1 | GO:0004386 | MF | 1 | GO:0016463 | MF | 1 | GO:0003910 | MF | 1 | GO:0016837 | MF | 1 |
| GO:0036374 | MF | 1 | GO:0004088 | MF | 1 | GO:0008812 | MF | 1 | GO:0004018 | MF | 1 | GO:0004502 | MF | 1 |
| GO:0008966 | MF | 1 | GO:0106008 | MF | 1 | GO:0004056 | MF | 1 | GO:0036374 | MF | 1 | GO:0003852 | MF | 1 |
| GO:0008965 | MF | 1 | GO:0008681 | MF | 1 | GO:0050417 | MF | 1 | GO:0050480 | MF | 1 | GO:0004411 | MF | 1 |
| GO:0050380 | MF | 1 | GO:0034480 | MF | 1 | GO:0015291 | MF | 1 | GO:0070290 | MF | 1 | GO:0047004 | MF | 1 |

|            |    |   |            |    |   |            |    |   |            |    |   |            |    |   |
|------------|----|---|------------|----|---|------------|----|---|------------|----|---|------------|----|---|
| GO:0015386 | MF | 1 | GO:0004719 | MF | 1 | GO:0008765 | MF | 1 | GO:0103011 | MF | 1 | GO:0008859 | MF | 1 |
| GO:0102100 | MF | 1 | GO:0047372 | MF | 1 | GO:0008686 | MF | 1 | GO:0050565 | MF | 1 | GO:0016657 | MF | 1 |
| GO:0046316 | MF | 1 | GO:0018578 | MF | 1 | GO:0009035 | MF | 1 | GO:0050483 | MF | 1 | GO:0016646 | MF | 1 |
| GO:0001671 | MF | 1 | GO:0004377 | MF | 1 | GO:0016830 | MF | 1 | GO:0004775 | MF | 1 | GO:0016298 | MF | 1 |
| GO:0004665 | MF | 1 | GO:0047116 | MF | 1 | GO:0008941 | MF | 1 | GO:0000179 | MF | 1 | GO:0001671 | MF | 1 |
| GO:0102391 | MF | 1 | GO:0015129 | MF | 1 | GO:0030697 | MF | 1 | GO:0031403 | MF | 1 | GO:0004844 | MF | 1 |
| GO:0052654 | MF | 1 | GO:0003991 | MF | 1 | GO:0008940 | MF | 1 | GO:0008738 | MF | 1 | GO:0003825 | MF | 1 |
| GO:0002083 | MF | 1 | GO:0008860 | MF | 1 | GO:0032843 | MF | 1 | GO:0003887 | MF | 1 | GO:0002935 | MF | 1 |
| GO:0004550 | MF | 1 | GO:0050897 | MF | 1 | GO:0008784 | MF | 1 | GO:0005047 | MF | 1 | GO:0018482 | MF | 1 |
| GO:0004516 | MF | 1 | GO:0032267 | MF | 1 | GO:0042380 | MF | 1 | GO:0019171 | MF | 1 | GO:0015207 | MF | 1 |
| GO:0033819 | MF | 1 | GO:0008887 | MF | 1 | GO:0016791 | MF | 1 | GO:0008237 | MF | 1 | GO:0008986 | MF | 1 |
| GO:0008864 | MF | 1 | GO:0008837 | MF | 1 | GO:0016701 | MF | 1 | GO:0009016 | MF | 1 | GO:0044212 | MF | 1 |
| GO:0061798 | MF | 1 | GO:0016213 | MF | 1 | GO:0052928 | MF | 1 | GO:0008556 | MF | 1 | GO:0003905 | MF | 1 |
| GO:0042301 | MF | 1 | GO:0102567 | MF | 1 | GO:0090582 | MF | 1 | GO:0019145 | MF | 1 | GO:0004784 | MF | 1 |
| GO:0015221 | MF | 1 | GO:0008080 | MF | 1 | GO:0008425 | MF | 1 | GO:0003862 | MF | 1 | GO:0047728 | MF | 1 |
| GO:0004813 | MF | 1 | GO:0016855 | MF | 1 | GO:0030976 | MF | 1 | GO:0000030 | MF | 1 | GO:0004648 | MF | 1 |
| GO:0004525 | MF | 1 | GO:0047443 | MF | 1 | GO:0009001 | MF | 1 | GO:0005345 | MF | 1 | GO:0004412 | MF | 1 |
| GO:0004061 | MF | 1 | GO:0001017 | MF | 1 | GO:0047070 | MF | 1 | GO:0000036 | MF | 1 | GO:0061599 | MF | 1 |
| GO:0032843 | MF | 1 | GO:0008794 | MF | 1 | GO:0004550 | MF | 1 | GO:0045303 | MF | 1 | GO:0001761 | MF | 1 |
| GO:0016888 | MF | 1 | GO:0004823 | MF | 1 | GO:0052596 | MF | 1 | GO:0101006 | MF | 1 | GO:0043752 | MF | 1 |
| GO:0043842 | MF | 1 | GO:0043842 | MF | 1 | GO:0008752 | MF | 1 | GO:0051075 | MF | 1 | GO:0008409 | MF | 1 |
| GO:0016639 | MF | 1 | GO:0061799 | MF | 1 | GO:0030983 | MF | 1 | GO:0008808 | MF | 1 | GO:0016153 | MF | 1 |
| GO:0016209 | MF | 1 | GO:0008832 | MF | 1 | GO:0000252 | MF | 1 | GO:0016655 | MF | 1 | GO:0047661 | MF | 1 |
| GO:0004652 | MF | 1 | GO:0102148 | MF | 1 | GO:0031177 | MF | 1 | GO:0052589 | MF | 1 | GO:0050537 | MF | 1 |
| GO:0004400 | MF | 1 | GO:0015187 | MF | 1 | GO:0000107 | MF | 1 | GO:0004385 | MF | 1 | GO:0050415 | MF | 1 |
| GO:0034545 | MF | 1 | GO:0016624 | MF | 1 | GO:0008690 | MF | 1 | GO:0047954 | MF | 1 | GO:0008138 | MF | 1 |
| GO:0042380 | MF | 1 | GO:0003935 | MF | 1 | GO:0052869 | MF | 1 | GO:0016836 | MF | 1 | GO:0035597 | MF | 1 |
| GO:0004160 | MF | 1 | GO:0016463 | MF | 1 | GO:0016491 | MF | 1 | GO:0009012 | MF | 1 | GO:0050300 | MF | 1 |
| GO:0003950 | MF | 1 | GO:0008812 | MF | 1 | GO:0009030 | MF | 1 | GO:0016811 | MF | 1 | GO:0042907 | MF | 1 |
| GO:0004456 | MF | 1 | GO:0004056 | MF | 1 | GO:0004830 | MF | 1 | GO:0015087 | MF | 1 | GO:0004813 | MF | 1 |
| GO:0015633 | MF | 1 | GO:0050417 | MF | 1 | GO:0030267 | MF | 1 | GO:0016780 | MF | 1 | GO:0003690 | MF | 1 |
| GO:0000701 | MF | 1 | GO:0015291 | MF | 1 | GO:0052906 | MF | 1 | GO:0050540 | MF | 1 | GO:0008081 | MF | 1 |
| GO:0009009 | MF | 1 | GO:0008765 | MF | 1 | GO:0018541 | MF | 1 | GO:0004451 | MF | 1 | GO:0046857 | MF | 1 |
| GO:0052740 | MF | 1 | GO:0008686 | MF | 1 | GO:0015097 | MF | 1 | GO:0004478 | MF | 1 | GO:0015190 | MF | 1 |
| GO:0018849 | MF | 1 | GO:0009035 | MF | 1 | GO:0009029 | MF | 1 | GO:0043878 | MF | 1 | GO:0102555 | MF | 1 |
| GO:0060698 | MF | 1 | GO:0016830 | MF | 1 | GO:0004491 | MF | 1 | GO:0016776 | MF | 1 | GO:0018623 | MF | 1 |
| GO:0009046 | MF | 1 | GO:0008941 | MF | 1 | GO:0046421 | MF | 1 | GO:0008693 | MF | 1 | GO:0008170 | MF | 1 |
| GO:0044183 | MF | 1 | GO:0030697 | MF | 1 | GO:0003942 | MF | 1 | GO:0017116 | MF | 1 | GO:0047982 | MF | 1 |
| GO:0102040 | MF | 1 | GO:0008940 | MF | 1 | GO:0015138 | MF | 1 | GO:0008966 | MF | 1 | GO:0008199 | MF | 1 |
| GO:0047293 | MF | 1 | GO:0032843 | MF | 1 | GO:0004768 | MF | 1 | GO:0005324 | MF | 1 | GO:0015538 | MF | 1 |
| GO:0010285 | MF | 1 | GO:0043565 | MF | 1 | GO:0004721 | MF | 1 | GO:0052913 | MF | 1 | GO:0033711 | MF | 1 |
| GO:0050547 | MF | 1 | GO:0008784 | MF | 1 | GO:0008270 | MF | 1 | GO:0008186 | MF | 1 | GO:0015654 | MF | 1 |
| GO:0052655 | MF | 1 | GO:0042380 | MF | 1 | GO:0008977 | MF | 1 | GO:0018667 | MF | 1 | GO:0016289 | MF | 1 |
| GO:0103015 | MF | 1 | GO:0016791 | MF | 1 | GO:0016758 | MF | 1 | GO:0052655 | MF | 1 | GO:0008704 | MF | 1 |
| GO:0050311 | MF | 1 | GO:0016701 | MF | 1 | GO:0004647 | MF | 1 | GO:0004523 | MF | 1 | GO:0004652 | MF | 1 |

|            |    |   |            |    |   |            |    |   |            |    |   |            |    |   |
|------------|----|---|------------|----|---|------------|----|---|------------|----|---|------------|----|---|
| GO:0030283 | MF | 1 | GO:0052928 | MF | 1 | GO:0008412 | MF | 1 | GO:0008853 | MF | 1 | GO:0004737 | MF | 1 |
| GO:0004799 | MF | 1 | GO:0090582 | MF | 1 | GO:0046912 | MF | 1 | GO:0008918 | MF | 1 | GO:0008444 | MF | 1 |
| GO:0016154 | MF | 1 | GO:0008425 | MF | 1 | GO:0004077 | MF | 1 | GO:0052915 | MF | 1 | GO:0004145 | MF | 1 |
| GO:0034338 | MF | 1 | GO:0030976 | MF | 1 | GO:0015293 | MF | 1 | GO:0008964 | MF | 1 | GO:0015638 | MF | 1 |
| GO:0004413 | MF | 1 | GO:0009001 | MF | 1 | GO:0017178 | MF | 1 | GO:0003842 | MF | 1 | GO:0016805 | MF | 1 |
| GO:0008830 | MF | 1 | GO:0047070 | MF | 1 | GO:0110153 | MF | 1 | GO:0043755 | MF | 1 | GO:0031402 | MF | 1 |
| GO:0070290 | MF | 1 | GO:0004550 | MF | 1 | GO:0018740 | MF | 1 | GO:0009036 | MF | 1 | GO:0032451 | MF | 1 |
| GO:0003858 | MF | 1 | GO:0008752 | MF | 1 | GO:0034986 | MF | 1 | GO:0004089 | MF | 1 | GO:0008962 | MF | 1 |
| GO:0047569 | MF | 1 | GO:0030983 | MF | 1 | GO:0004170 | MF | 1 | GO:0008924 | MF | 1 | GO:0046566 | MF | 1 |
| GO:0032549 | MF | 1 | GO:0000252 | MF | 1 | GO:0015450 | MF | 1 | GO:0031071 | MF | 1 | GO:0043917 | MF | 1 |
| GO:0004792 | MF | 1 | GO:0031177 | MF | 1 | GO:0004802 | MF | 1 | GO:0018669 | MF | 1 | GO:0003841 | MF | 1 |
| GO:0050548 | MF | 1 | GO:0000107 | MF | 1 | GO:0004350 | MF | 1 | GO:0016212 | MF | 1 | GO:0052693 | MF | 1 |
| GO:0019145 | MF | 1 | GO:0008690 | MF | 1 | GO:0009014 | MF | 1 | GO:0008881 | MF | 1 | GO:0004602 | MF | 1 |
| GO:0018509 | MF | 1 | GO:0052869 | MF | 1 | GO:0015191 | MF | 1 | GO:0033721 | MF | 1 | GO:0106026 | MF | 1 |
| GO:0052927 | MF | 1 | GO:0009030 | MF | 1 | GO:0033592 | MF | 1 | GO:0018479 | MF | 1 | GO:0052593 | MF | 1 |
| GO:0016657 | MF | 1 | GO:0004830 | MF | 1 | GO:0008442 | MF | 1 | GO:0050303 | MF | 1 | GO:0004322 | MF | 1 |
| GO:0033721 | MF | 1 | GO:0030267 | MF | 1 | GO:0019152 | MF | 1 | GO:0003984 | MF | 1 | GO:0005543 | MF | 1 |
| GO:0008808 | MF | 1 | GO:0052906 | MF | 1 | GO:0015196 | MF | 1 | GO:0004613 | MF | 1 | GO:0016595 | MF | 1 |
| GO:0033856 | MF | 1 | GO:0018541 | MF | 1 | GO:0008312 | MF | 1 | GO:0016901 | MF | 1 | GO:0016407 | MF | 1 |
| GO:0008763 | MF | 1 | GO:0015097 | MF | 1 | GO:0005506 | MF | 1 | GO:0046820 | MF | 1 | GO:0043908 | MF | 1 |
| GO:0051266 | MF | 1 | GO:0009029 | MF | 1 | GO:0030955 | MF | 1 | GO:0019159 | MF | 1 | GO:0050235 | MF | 1 |
| GO:0052693 | MF | 1 | GO:0004491 | MF | 1 | GO:0106029 | MF | 1 | GO:0004079 | MF | 1 | GO:0008521 | MF | 1 |
| GO:0004632 | MF | 1 | GO:0046421 | MF | 1 | GO:0004392 | MF | 1 | GO:0070626 | MF | 1 | GO:0004067 | MF | 1 |
| GO:0140306 | MF | 1 | GO:0003942 | MF | 1 | GO:0004637 | MF | 1 | GO:0004073 | MF | 1 | GO:0000908 | MF | 1 |
| GO:0019134 | MF | 1 | GO:0015138 | MF | 1 | GO:0008763 | MF | 1 | GO:0003729 | MF | 1 | GO:0018800 | MF | 1 |
| GO:0016168 | MF | 1 | GO:0004768 | MF | 1 | GO:0004855 | MF | 1 | GO:0009039 | MF | 1 | GO:0016793 | MF | 1 |
| GO:0016706 | MF | 1 | GO:0004721 | MF | 1 | GO:0008551 | MF | 1 | GO:0003960 | MF | 1 | GO:0004815 | MF | 1 |
| GO:0004044 | MF | 1 | GO:0008270 | MF | 1 | GO:0050622 | MF | 1 | GO:0008988 | MF | 1 | GO:0008774 | MF | 1 |
| GO:0043908 | MF | 1 | GO:0008977 | MF | 1 | GO:0031132 | MF | 1 | GO:0044318 | MF | 1 | GO:0034567 | MF | 1 |
| GO:0000309 | MF | 1 | GO:0016758 | MF | 1 | GO:0047267 | MF | 1 | GO:0047100 | MF | 1 | GO:0008806 | MF | 1 |
| GO:0005328 | MF | 1 | GO:0004647 | MF | 1 | GO:0003868 | MF | 1 | GO:0033983 | MF | 1 | GO:0052832 | MF | 1 |
| GO:0008444 | MF | 1 | GO:0008412 | MF | 1 | GO:0003993 | MF | 1 | GO:0036524 | MF | 1 | GO:0004825 | MF | 1 |
| GO:0036380 | MF | 1 | GO:0046912 | MF | 1 | GO:0019829 | MF | 1 | GO:0050570 | MF | 1 | GO:0004467 | MF | 1 |
| GO:0052657 | MF | 1 | GO:0004077 | MF | 1 | GO:0008813 | MF | 1 | GO:0008759 | MF | 1 | GO:0047570 | MF | 1 |
| GO:0061503 | MF | 1 | GO:0015293 | MF | 1 | GO:0047150 | MF | 1 | GO:0008925 | MF | 1 | GO:0003724 | MF | 1 |
| GO:0047475 | MF | 1 | GO:0017178 | MF | 1 | GO:0047580 | MF | 1 | GO:0015210 | MF | 1 | GO:0051991 | MF | 1 |
| GO:0046982 | MF | 1 | GO:0110153 | MF | 1 | GO:0015079 | MF | 1 | GO:0044183 | MF | 1 | GO:0008734 | MF | 1 |
| GO:0008885 | MF | 1 | GO:0018740 | MF | 1 | GO:0033767 | MF | 1 | GO:0030611 | MF | 1 | GO:0008381 | MF | 1 |
| GO:0050440 | MF | 1 | GO:0034986 | MF | 1 | GO:0008939 | MF | 1 | GO:0004359 | MF | 1 | GO:0000210 | MF | 1 |
| GO:0070041 | MF | 1 | GO:0004170 | MF | 1 | GO:0004328 | MF | 1 | GO:0015185 | MF | 1 | GO:0016863 | MF | 1 |
| GO:0043022 | MF | 1 | GO:0015450 | MF | 1 | GO:0000906 | MF | 1 | GO:0003883 | MF | 1 | GO:0004852 | MF | 1 |
| GO:0004333 | MF | 1 | GO:0004802 | MF | 1 | GO:0008171 | MF | 1 | GO:0052929 | MF | 1 | GO:0005328 | MF | 1 |
| GO:0008750 | MF | 1 | GO:0004350 | MF | 1 | GO:0051537 | MF | 1 | GO:0008948 | MF | 1 | GO:0102007 | MF | 1 |
| GO:0047445 | MF | 1 | GO:0009014 | MF | 1 | GO:0047794 | MF | 1 | GO:0019825 | MF | 1 | GO:0017151 | MF | 1 |
| GO:0004854 | MF | 1 | GO:0015191 | MF | 1 | GO:0050136 | MF | 1 | GO:0035539 | MF | 1 | GO:0015103 | MF | 1 |

|            |    |   |            |    |   |            |    |   |            |    |   |            |    |   |
|------------|----|---|------------|----|---|------------|----|---|------------|----|---|------------|----|---|
| GO:0046914 | MF | 1 | GO:0033592 | MF | 1 | GO:0016987 | MF | 1 | GO:0016872 | MF | 1 | GO:0009975 | MF | 1 |
| GO:0015123 | MF | 1 | GO:0008442 | MF | 1 | GO:0015489 | MF | 1 | GO:0018583 | MF | 1 | GO:0004605 | MF | 1 |
| GO:0004714 | MF | 1 | GO:0019152 | MF | 1 | GO:0061798 | MF | 1 | GO:0097163 | MF | 1 | GO:0016159 | MF | 1 |
| GO:0101006 | MF | 1 | GO:0008312 | MF | 1 | GO:0016462 | MF | 1 | GO:0042970 | MF | 1 | GO:0008705 | MF | 1 |
| GO:0033734 | MF | 1 | GO:0030955 | MF | 1 | GO:0015501 | MF | 1 | GO:0004853 | MF | 1 | GO:0003950 | MF | 1 |
| GO:0008442 | MF | 1 | GO:0106029 | MF | 1 | GO:0102530 | MF | 1 | GO:0036307 | MF | 1 | GO:0005298 | MF | 1 |
| GO:0008988 | MF | 1 | GO:0004392 | MF | 1 | GO:0015528 | MF | 1 | GO:0004068 | MF | 1 | GO:0090483 | MF | 1 |
| GO:0000034 | MF | 1 | GO:0004637 | MF | 1 | GO:0004065 | MF | 1 | GO:0016980 | MF | 1 | GO:0046553 | MF | 1 |
| GO:0102953 | MF | 1 | GO:0008763 | MF | 1 | GO:0004747 | MF | 1 | GO:0050355 | MF | 1 | GO:0004459 | MF | 1 |
| GO:0016279 | MF | 1 | GO:0004855 | MF | 1 | GO:0015276 | MF | 1 | GO:0018548 | MF | 1 | GO:0032549 | MF | 1 |
| GO:0008673 | MF | 1 | GO:0008551 | MF | 1 | GO:0004127 | MF | 1 | GO:0005198 | MF | 1 | GO:0003959 | MF | 1 |
| GO:0004121 | MF | 1 | GO:0050622 | MF | 1 | GO:0004724 | MF | 1 | GO:0004129 | MF | 1 | GO:0030272 | MF | 1 |
| GO:0008813 | MF | 1 | GO:0031132 | MF | 1 | GO:0043825 | MF | 1 | GO:0047949 | MF | 1 | GO:0004042 | MF | 1 |
| GO:0016855 | MF | 1 | GO:0047267 | MF | 1 | GO:0050269 | MF | 1 | GO:0004367 | MF | 1 | GO:0008933 | MF | 1 |
| GO:0004148 | MF | 1 | GO:0008955 | MF | 1 | GO:0042781 | MF | 1 | GO:0004529 | MF | 1 | GO:0017168 | MF | 1 |
| GO:0008691 | MF | 1 | GO:0003868 | MF | 1 | GO:0003954 | MF | 1 | GO:0044715 | MF | 1 | GO:0047575 | MF | 1 |
| GO:0050060 | MF | 1 | GO:0003993 | MF | 1 | GO:0008721 | MF | 1 | GO:0097216 | MF | 1 | GO:0004325 | MF | 1 |
| GO:0005324 | MF | 1 | GO:0019829 | MF | 1 | GO:0004061 | MF | 1 | GO:0004106 | MF | 1 | GO:0036220 | MF | 1 |
| GO:0019829 | MF | 1 | GO:0008813 | MF | 1 | GO:0008817 | MF | 1 | GO:0043815 | MF | 1 | GO:0004673 | MF | 1 |
| GO:0004106 | MF | 1 | GO:0047150 | MF | 1 | GO:0003861 | MF | 1 | GO:0008379 | MF | 1 | GO:0045301 | MF | 1 |
| GO:0004020 | MF | 1 | GO:0047580 | MF | 1 | GO:0015366 | MF | 1 | GO:0005280 | MF | 1 | GO:0018635 | MF | 1 |
| GO:0015112 | MF | 1 | GO:0015079 | MF | 1 | GO:0050394 | MF | 1 | GO:0015294 | MF | 1 | GO:0004592 | MF | 1 |
| GO:0001530 | MF | 1 | GO:0033767 | MF | 1 | GO:0033862 | MF | 1 | GO:0008239 | MF | 1 | GO:0042301 | MF | 1 |
| GO:0033735 | MF | 1 | GO:0008939 | MF | 1 | GO:0003879 | MF | 1 | GO:0047533 | MF | 1 | GO:0008796 | MF | 1 |
| GO:0009036 | MF | 1 | GO:0004328 | MF | 1 | GO:0070205 | MF | 1 | GO:0001681 | MF | 1 | GO:0004615 | MF | 1 |
| GO:0004399 | MF | 1 | GO:0000906 | MF | 1 | GO:0005351 | MF | 1 | GO:0016671 | MF | 1 | GO:0103045 | MF | 1 |
| GO:0018800 | MF | 1 | GO:0008171 | MF | 1 | GO:0016620 | MF | 1 | GO:0008324 | MF | 1 | GO:0017108 | MF | 1 |
| GO:0004642 | MF | 1 | GO:0047794 | MF | 1 | GO:0019134 | MF | 1 | GO:0005247 | MF | 1 | GO:0016691 | MF | 1 |
| GO:0035599 | MF | 1 | GO:0050136 | MF | 1 | GO:0046982 | MF | 1 | GO:0050308 | MF | 1 | GO:0043273 | MF | 1 |
| GO:0008942 | MF | 1 | GO:0016987 | MF | 1 | GO:0020037 | MF | 1 | GO:0008111 | MF | 1 | GO:0035438 | MF | 1 |
| GO:0004343 | MF | 1 | GO:0015489 | MF | 1 | GO:0008990 | MF | 1 | GO:0031404 | MF | 1 | GO:0070181 | MF | 1 |
| GO:0003987 | MF | 1 | GO:0061798 | MF | 1 | GO:0003681 | MF | 1 | GO:0004820 | MF | 1 | GO:0008873 | MF | 1 |
| GO:0008899 | MF | 1 | GO:0016462 | MF | 1 | GO:0008725 | MF | 1 | GO:0008899 | MF | 1 | GO:0047200 | MF | 1 |
| GO:0034986 | MF | 1 | GO:0015501 | MF | 1 | GO:0004457 | MF | 1 | GO:0080130 | MF | 1 | GO:0005253 | MF | 1 |
| GO:0004846 | MF | 1 | GO:0102530 | MF | 1 | GO:0004149 | MF | 1 | GO:0052881 | MF | 1 | GO:0004326 | MF | 1 |
| GO:0062101 | MF | 1 | GO:0015528 | MF | 1 | GO:0016837 | MF | 1 | GO:0004333 | MF | 1 | GO:0008252 | MF | 1 |
| GO:0047631 | MF | 1 | GO:0004065 | MF | 1 | GO:0004502 | MF | 1 | GO:0050380 | MF | 1 | GO:0016742 | MF | 1 |
| GO:0061799 | MF | 1 | GO:0004747 | MF | 1 | GO:0003852 | MF | 1 | GO:0004664 | MF | 1 | GO:0004355 | MF | 1 |
| GO:0008657 | MF | 1 | GO:0015276 | MF | 1 | GO:0004411 | MF | 1 | GO:0009046 | MF | 1 | GO:0031992 | MF | 1 |
| GO:0004821 | MF | 1 | GO:0004127 | MF | 1 | GO:0047004 | MF | 1 | GO:0030604 | MF | 1 | GO:0015565 | MF | 1 |
| GO:0008720 | MF | 1 | GO:0043825 | MF | 1 | GO:0008859 | MF | 1 | GO:0016154 | MF | 1 | GO:0004070 | MF | 1 |
| GO:0019239 | MF | 1 | GO:0050269 | MF | 1 | GO:0016657 | MF | 1 | GO:0004107 | MF | 1 | GO:0004047 | MF | 1 |
| GO:0050394 | MF | 1 | GO:0042781 | MF | 1 | GO:0016646 | MF | 1 | GO:0004019 | MF | 1 | GO:0047536 | MF | 1 |
| GO:0008879 | MF | 1 | GO:0003954 | MF | 1 | GO:0016298 | MF | 1 | GO:0004633 | MF | 1 | GO:0016279 | MF | 1 |
| GO:0015098 | MF | 1 | GO:0008721 | MF | 1 | GO:0001671 | MF | 1 | GO:0050560 | MF | 1 | GO:0008959 | MF | 1 |



|            |    |   |            |    |   |            |    |   |            |    |   |            |    |   |
|------------|----|---|------------|----|---|------------|----|---|------------|----|---|------------|----|---|
| GO:0004601 | MF | 1 | GO:0004061 | MF | 1 | GO:0004844 | MF | 1 | GO:0003961 | MF | 1 | GO:0008953 | MF | 1 |
| GO:0033608 | MF | 1 | GO:0008817 | MF | 1 | GO:0003825 | MF | 1 | GO:0102391 | MF | 1 | GO:0008696 | MF | 1 |
| GO:0033971 | MF | 1 | GO:0003861 | MF | 1 | GO:0002935 | MF | 1 | GO:0036380 | MF | 1 | GO:0008676 | MF | 1 |
| GO:0000107 | MF | 1 | GO:0015366 | MF | 1 | GO:0018482 | MF | 1 | GO:0060090 | MF | 1 | GO:0004165 | MF | 1 |
| GO:0017150 | MF | 1 | GO:0050394 | MF | 1 | GO:0015207 | MF | 1 | GO:0015440 | MF | 1 | GO:0015424 | MF | 1 |
| GO:0008081 | MF | 1 | GO:0033862 | MF | 1 | GO:0030395 | MF | 1 | GO:0043199 | MF | 1 | GO:0061579 | MF | 1 |
| GO:0015661 | MF | 1 | GO:0003879 | MF | 1 | GO:0008986 | MF | 1 | GO:0019146 | MF | 1 | GO:0051499 | MF | 1 |
| GO:0003796 | MF | 1 | GO:0070205 | MF | 1 | GO:0044212 | MF | 1 | GO:0016152 | MF | 1 | GO:0004045 | MF | 1 |
| GO:0046566 | MF | 1 | GO:0005351 | MF | 1 | GO:0003905 | MF | 1 | GO:1903231 | MF | 1 | GO:0001512 | MF | 1 |
| GO:0047602 | MF | 1 | GO:0016620 | MF | 1 | GO:0004829 | MF | 1 | GO:0050232 | MF | 1 | GO:0018849 | MF | 1 |
| GO:0004146 | MF | 1 | GO:0019134 | MF | 1 | GO:0004784 | MF | 1 | GO:0000703 | MF | 1 | GO:0018662 | MF | 1 |
| GO:0008939 | MF | 1 | GO:0046982 | MF | 1 | GO:0047728 | MF | 1 | GO:0003743 | MF | 1 | GO:0050297 | MF | 1 |
| GO:0004640 | MF | 1 | GO:0020037 | MF | 1 | GO:0004648 | MF | 1 | GO:0034979 | MF | 1 | GO:0004115 | MF | 1 |
| GO:0043168 | MF | 1 | GO:0019534 | MF | 1 | GO:0004412 | MF | 1 | GO:0102130 | MF | 1 | GO:0051745 | MF | 1 |
| GO:0050020 | MF | 1 | GO:0008990 | MF | 1 | GO:0061599 | MF | 1 | GO:0008871 | MF | 1 | GO:0003957 | MF | 1 |
| GO:0031419 | MF | 1 | GO:0003681 | MF | 1 | GO:0001761 | MF | 1 | GO:0004075 | MF | 1 | GO:0034458 | MF | 1 |
| GO:0050235 | MF | 1 | GO:0008725 | MF | 1 | GO:0043752 | MF | 1 | GO:0008531 | MF | 1 | GO:0046353 | MF | 1 |
| GO:0047448 | MF | 1 | GO:0004457 | MF | 1 | GO:0008409 | MF | 1 | GO:0005384 | MF | 1 | GO:0030145 | MF | 1 |
| GO:0047116 | MF | 1 | GO:0004149 | MF | 1 | GO:0016153 | MF | 1 | GO:0030234 | MF | 1 | GO:0004854 | MF | 1 |
| GO:0004636 | MF | 1 | GO:0016837 | MF | 1 | GO:0047661 | MF | 1 | GO:0004084 | MF | 1 | GO:0003908 | MF | 1 |
| GO:0008977 | MF | 1 | GO:0004502 | MF | 1 | GO:0050660 | MF | 1 | GO:0070042 | MF | 1 | GO:0030371 | MF | 1 |
| GO:0008716 | MF | 1 | GO:0003852 | MF | 1 | GO:0050537 | MF | 1 | GO:0016790 | MF | 1 | GO:0004787 | MF | 1 |
| GO:0045302 | MF | 1 | GO:0004411 | MF | 1 | GO:0050415 | MF | 1 | GO:0004614 | MF | 1 | GO:0004730 | MF | 1 |
| GO:0008662 | MF | 1 | GO:0047004 | MF | 1 | GO:0003955 | MF | 1 | GO:0016645 | MF | 1 | GO:0003867 | MF | 1 |
| GO:0008177 | MF | 1 | GO:0008859 | MF | 1 | GO:0008138 | MF | 1 | GO:0004399 | MF | 1 | GO:0033737 | MF | 1 |
| GO:0008930 | MF | 1 | GO:0016657 | MF | 1 | GO:0035597 | MF | 1 | GO:0008811 | MF | 1 | GO:0004488 | MF | 1 |
| GO:0008764 | MF | 1 | GO:0016646 | MF | 1 | GO:0050300 | MF | 1 | GO:0003916 | MF | 1 | GO:0061711 | MF | 1 |
| GO:0050518 | MF | 1 | GO:0016298 | MF | 1 | GO:0042907 | MF | 1 | GO:0052717 | MF | 1 | GO:0004801 | MF | 1 |
| GO:0016980 | MF | 1 | GO:0001671 | MF | 1 | GO:0004813 | MF | 1 | GO:0004794 | MF | 1 | GO:0003899 | MF | 1 |
| GO:0004674 | MF | 1 | GO:0004844 | MF | 1 | GO:0048027 | MF | 1 | GO:0033739 | MF | 1 | GO:0016437 | MF | 1 |
| GO:0008940 | MF | 1 | GO:0003825 | MF | 1 | GO:0003690 | MF | 1 | GO:0015141 | MF | 1 | GO:0050555 | MF | 1 |
| GO:0033732 | MF | 1 | GO:0002935 | MF | 1 | GO:0008081 | MF | 1 | GO:0102420 | MF | 1 | GO:0004352 | MF | 1 |
| GO:0047196 | MF | 1 | GO:0018482 | MF | 1 | GO:0046857 | MF | 1 | GO:0003941 | MF | 1 | GO:0008919 | MF | 1 |
| GO:0047922 | MF | 1 | GO:0015207 | MF | 1 | GO:0090729 | MF | 1 | GO:0004064 | MF | 1 | GO:0004190 | MF | 1 |
| GO:0004190 | MF | 1 | GO:0030395 | MF | 1 | GO:0015190 | MF | 1 | GO:0034024 | MF | 1 | GO:0003911 | MF | 1 |
| GO:0047919 | MF | 1 | GO:0008986 | MF | 1 | GO:0102555 | MF | 1 | GO:0016209 | MF | 1 | GO:0051538 | MF | 1 |
| GO:0003729 | MF | 1 | GO:0044212 | MF | 1 | GO:0018623 | MF | 1 | GO:0047617 | MF | 1 | GO:0004497 | MF | 1 |
| GO:0004479 | MF | 1 | GO:0003905 | MF | 1 | GO:0008170 | MF | 1 | GO:0052601 | MF | 1 | GO:0003849 | MF | 1 |
| GO:0004352 | MF | 1 | GO:0004829 | MF | 1 | GO:0047982 | MF | 1 | GO:0009027 | MF | 1 | GO:0004334 | MF | 1 |
| GO:0008829 | MF | 1 | GO:0004784 | MF | 1 | GO:0052588 | MF | 1 | GO:0050548 | MF | 1 | GO:0003910 | MF | 1 |
| GO:0097718 | MF | 1 | GO:0047728 | MF | 1 | GO:0008199 | MF | 1 | GO:0016989 | MF | 1 | GO:0004018 | MF | 1 |
| GO:0015444 | MF | 1 | GO:0004648 | MF | 1 | GO:0015538 | MF | 1 | GO:0097718 | MF | 1 | GO:0017111 | MF | 1 |
| GO:0008791 | MF | 1 | GO:0004412 | MF | 1 | GO:0033711 | MF | 1 | GO:0047545 | MF | 1 | GO:0036374 | MF | 1 |
| GO:0003916 | MF | 1 | GO:0061599 | MF | 1 | GO:0015654 | MF | 1 | GO:0008803 | MF | 1 | GO:0050480 | MF | 1 |
| GO:0052601 | MF | 1 | GO:0001761 | MF | 1 | GO:0016289 | MF | 1 | GO:0004141 | MF | 1 | GO:0070404 | MF | 1 |

|            |    |   |            |    |   |            |    |   |            |    |   |            |    |   |
|------------|----|---|------------|----|---|------------|----|---|------------|----|---|------------|----|---|
| GO:0047728 | MF | 1 | GO:0043752 | MF | 1 | GO:0008704 | MF | 1 | GO:0008780 | MF | 1 | GO:0070290 | MF | 1 |
| GO:0015106 | MF | 1 | GO:0008409 | MF | 1 | GO:0004652 | MF | 1 | GO:0102966 | MF | 1 | GO:0103011 | MF | 1 |
| GO:0008681 | MF | 1 | GO:0016153 | MF | 1 | GO:0004737 | MF | 1 | GO:0003725 | MF | 1 | GO:0050565 | MF | 1 |
| GO:0016631 | MF | 1 | GO:0047661 | MF | 1 | GO:0008444 | MF | 1 | GO:0015220 | MF | 1 | GO:0050483 | MF | 1 |
| GO:0004848 | MF | 1 | GO:0050660 | MF | 1 | GO:0004145 | MF | 1 | GO:0015462 | MF | 1 | GO:0004775 | MF | 1 |
| GO:0004514 | MF | 1 | GO:0050537 | MF | 1 | GO:0015638 | MF | 1 | GO:0089714 | MF | 1 | GO:0000179 | MF | 1 |
| GO:0008649 | MF | 1 | GO:0050415 | MF | 1 | GO:0022877 | MF | 1 | GO:0008428 | MF | 1 | GO:0031403 | MF | 1 |
| GO:0070038 | MF | 1 | GO:0003955 | MF | 1 | GO:0016805 | MF | 1 | GO:0010285 | MF | 1 | GO:0008738 | MF | 1 |
| GO:0016798 | MF | 1 | GO:0008138 | MF | 1 | GO:0003684 | MF | 1 | GO:0008113 | MF | 1 | GO:0016846 | MF | 1 |
| GO:0008935 | MF | 1 | GO:0035597 | MF | 1 | GO:0031402 | MF | 1 | GO:0008375 | MF | 1 | GO:0003756 | MF | 1 |
| GO:0003951 | MF | 1 | GO:0050300 | MF | 1 | GO:0032451 | MF | 1 | GO:0047134 | MF | 1 | GO:0003887 | MF | 1 |
| GO:0004109 | MF | 1 | GO:0042907 | MF | 1 | GO:0008962 | MF | 1 | GO:0004347 | MF | 1 | GO:0005047 | MF | 1 |
| GO:0004328 | MF | 1 | GO:0004813 | MF | 1 | GO:0046566 | MF | 1 | GO:0003962 | MF | 1 | GO:0043138 | MF | 1 |
| GO:0102542 | MF | 1 | GO:0048027 | MF | 1 | GO:0043917 | MF | 1 | GO:0051082 | MF | 1 | GO:0019171 | MF | 1 |
| GO:0003949 | MF | 1 | GO:0003690 | MF | 1 | GO:0003841 | MF | 1 | GO:0047964 | MF | 1 | GO:0008237 | MF | 1 |
| GO:0004585 | MF | 1 | GO:0008081 | MF | 1 | GO:0052693 | MF | 1 | GO:0036361 | MF | 1 | GO:0009016 | MF | 1 |
| GO:0050570 | MF | 1 | GO:0046857 | MF | 1 | GO:0004602 | MF | 1 | GO:0048474 | MF | 1 | GO:0008556 | MF | 1 |
| GO:0103046 | MF | 1 | GO:0090729 | MF | 1 | GO:0008913 | MF | 1 | GO:0004372 | MF | 1 | GO:0019145 | MF | 1 |
| GO:0008734 | MF | 1 | GO:0015190 | MF | 1 | GO:0106026 | MF | 1 | GO:0008841 | MF | 1 | GO:0003862 | MF | 1 |
| GO:0005543 | MF | 1 | GO:0102555 | MF | 1 | GO:0052593 | MF | 1 | GO:0017057 | MF | 1 | GO:0000030 | MF | 1 |
| GO:0034023 | MF | 1 | GO:0018623 | MF | 1 | GO:0004322 | MF | 1 | GO:0004414 | MF | 1 | GO:0005345 | MF | 1 |
| GO:0004124 | MF | 1 | GO:0004812 | MF | 1 | GO:0005543 | MF | 1 | GO:0016888 | MF | 1 | GO:0000036 | MF | 1 |
| GO:0102130 | MF | 1 | GO:0008170 | MF | 1 | GO:0016595 | MF | 1 | GO:0016995 | MF | 1 | GO:0018580 | MF | 1 |
| GO:0004326 | MF | 1 | GO:0047982 | MF | 1 | GO:0016407 | MF | 1 | GO:0050580 | MF | 1 | GO:0045303 | MF | 1 |
| GO:0071111 | MF | 1 | GO:0052588 | MF | 1 | GO:0043908 | MF | 1 | GO:0043546 | MF | 1 | GO:0101006 | MF | 1 |
| GO:0004609 | MF | 1 | GO:0008199 | MF | 1 | GO:0050235 | MF | 1 | GO:0051864 | MF | 1 | GO:0030552 | MF | 1 |
| GO:0004049 | MF | 1 | GO:0015538 | MF | 1 | GO:0008521 | MF | 1 | GO:0015093 | MF | 1 | GO:0051075 | MF | 1 |
| GO:0008918 | MF | 1 | GO:0033711 | MF | 1 | GO:0004067 | MF | 1 | GO:0008851 | MF | 1 | GO:0008808 | MF | 1 |
| GO:0050299 | MF | 1 | GO:0015654 | MF | 1 | GO:0000908 | MF | 1 | GO:0080030 | MF | 1 | GO:0016655 | MF | 1 |
| GO:0015412 | MF | 1 | GO:0016289 | MF | 1 | GO:0018800 | MF | 1 | GO:0004422 | MF | 1 | GO:0052589 | MF | 1 |
| GO:0000252 | MF | 1 | GO:0008519 | MF | 1 | GO:0016793 | MF | 1 | GO:0008720 | MF | 1 | GO:0004385 | MF | 1 |
| GO:1901515 | MF | 1 | GO:0008704 | MF | 1 | GO:0004815 | MF | 1 | GO:0070968 | MF | 1 | GO:0047954 | MF | 1 |
| GO:0008841 | MF | 1 | GO:0004652 | MF | 1 | GO:0008774 | MF | 1 | GO:0015183 | MF | 1 | GO:0016836 | MF | 1 |
| GO:0015044 | MF | 1 | GO:0004737 | MF | 1 | GO:0034567 | MF | 1 | GO:0033229 | MF | 1 | GO:0009973 | MF | 1 |
| GO:0004301 | MF | 1 | GO:0008444 | MF | 1 | GO:0008806 | MF | 1 | GO:0004479 | MF | 1 | GO:0009012 | MF | 1 |
| GO:0004455 | MF | 1 | GO:0004145 | MF | 1 | GO:0052832 | MF | 1 | GO:0008748 | MF | 1 | GO:0016811 | MF | 1 |
| GO:0044715 | MF | 1 | GO:0015638 | MF | 1 | GO:0004825 | MF | 1 | GO:0008892 | MF | 1 | GO:0043024 | MF | 1 |
| GO:0043815 | MF | 1 | GO:0022877 | MF | 1 | GO:0004467 | MF | 1 | GO:0004146 | MF | 1 | GO:0043750 | MF | 1 |
| GO:0008872 | MF | 1 | GO:0016805 | MF | 1 | GO:0047570 | MF | 1 | GO:0015123 | MF | 1 | GO:0015087 | MF | 1 |
| GO:0003919 | MF | 1 | GO:0003684 | MF | 1 | GO:0003724 | MF | 1 | GO:0004590 | MF | 1 | GO:0016780 | MF | 1 |
| GO:0043864 | MF | 1 | GO:0031402 | MF | 1 | GO:0051991 | MF | 1 | GO:0047429 | MF | 1 | GO:0050540 | MF | 1 |
| GO:0004372 | MF | 1 | GO:0032451 | MF | 1 | GO:0050020 | MF | 1 | GO:0043621 | MF | 1 | GO:0004451 | MF | 1 |
| GO:0047280 | MF | 1 | GO:0008962 | MF | 1 | GO:0008734 | MF | 1 | GO:0015199 | MF | 1 | GO:0004478 | MF | 1 |
| GO:0001072 | MF | 1 | GO:0046566 | MF | 1 | GO:0008381 | MF | 1 | GO:0008870 | MF | 1 | GO:0043878 | MF | 1 |
| GO:0009973 | MF | 1 | GO:0043917 | MF | 1 | GO:0000210 | MF | 1 | GO:0018687 | MF | 1 | GO:0008693 | MF | 1 |

|            |    |   |            |    |   |            |    |   |            |    |   |            |    |   |
|------------|----|---|------------|----|---|------------|----|---|------------|----|---|------------|----|---|
| GO:0017168 | MF | 1 | GO:0003841 | MF | 1 | GO:0016863 | MF | 1 | GO:0030429 | MF | 1 | GO:0004527 | MF | 1 |
| GO:0004047 | MF | 1 | GO:0052693 | MF | 1 | GO:0004852 | MF | 1 | GO:0047919 | MF | 1 | GO:0003688 | MF | 1 |
| GO:0004312 | MF | 1 | GO:0004602 | MF | 1 | GO:0005328 | MF | 1 | GO:0102953 | MF | 1 | GO:0017116 | MF | 1 |
| GO:0004832 | MF | 1 | GO:0008913 | MF | 1 | GO:0102007 | MF | 1 | GO:0004525 | MF | 1 | GO:0008966 | MF | 1 |
| GO:0033739 | MF | 1 | GO:0106026 | MF | 1 | GO:0017151 | MF | 1 | GO:0004588 | MF | 1 | GO:0005324 | MF | 1 |
| GO:0008767 | MF | 1 | GO:0004322 | MF | 1 | GO:0015103 | MF | 1 | GO:0004764 | MF | 1 | GO:0052913 | MF | 1 |
| GO:0046553 | MF | 1 | GO:0005543 | MF | 1 | GO:0009975 | MF | 1 | GO:0047895 | MF | 1 | GO:0008186 | MF | 1 |
| GO:0016849 | MF | 1 | GO:0016595 | MF | 1 | GO:0004040 | MF | 1 | GO:0016868 | MF | 1 | GO:0018667 | MF | 1 |
| GO:0004367 | MF | 1 | GO:0016407 | MF | 1 | GO:0004605 | MF | 1 | GO:0047925 | MF | 1 | GO:0052655 | MF | 1 |
| GO:0043175 | MF | 1 | GO:0043908 | MF | 1 | GO:0005507 | MF | 1 | GO:0050334 | MF | 1 | GO:0004523 | MF | 1 |
| GO:0043878 | MF | 1 | GO:0050235 | MF | 1 | GO:0016159 | MF | 1 | GO:0016881 | MF | 1 | GO:0008853 | MF | 1 |
| GO:0004830 | MF | 1 | GO:0008521 | MF | 1 | GO:0008705 | MF | 1 | GO:0018775 | MF | 1 | GO:0008047 | MF | 1 |
| GO:0019168 | MF | 1 | GO:0004067 | MF | 1 | GO:0003950 | MF | 1 | GO:0003986 | MF | 1 | GO:0008918 | MF | 1 |
| GO:0050297 | MF | 1 | GO:0000908 | MF | 1 | GO:0005298 | MF | 1 | GO:0050048 | MF | 1 | GO:0052915 | MF | 1 |
| GO:0016743 | MF | 1 | GO:0018800 | MF | 1 | GO:0090483 | MF | 1 | GO:0004595 | MF | 1 | GO:0008964 | MF | 1 |
| GO:0042132 | MF | 1 | GO:0016793 | MF | 1 | GO:0046553 | MF | 1 | GO:0043785 | MF | 1 | GO:0003842 | MF | 1 |
| GO:0008897 | MF | 1 | GO:0004815 | MF | 1 | GO:0004459 | MF | 1 | GO:0015505 | MF | 1 | GO:0043755 | MF | 1 |
| GO:0003905 | MF | 1 | GO:0008774 | MF | 1 | GO:0032549 | MF | 1 | GO:0004473 | MF | 1 | GO:0009036 | MF | 1 |
| GO:0008479 | MF | 1 | GO:0034567 | MF | 1 | GO:0003959 | MF | 1 | GO:0004356 | MF | 1 | GO:0004089 | MF | 1 |
| GO:0004143 | MF | 1 | GO:0008806 | MF | 1 | GO:0030272 | MF | 1 | GO:1990238 | MF | 1 | GO:0008924 | MF | 1 |
| GO:0033727 | MF | 1 | GO:0052832 | MF | 1 | GO:0004042 | MF | 1 | GO:0004489 | MF | 1 | GO:0004222 | MF | 1 |
| GO:0050537 | MF | 1 | GO:0004825 | MF | 1 | GO:0008933 | MF | 1 | GO:0003939 | MF | 1 | GO:0031071 | MF | 1 |
| GO:0018482 | MF | 1 | GO:0004467 | MF | 1 | GO:0017168 | MF | 1 | GO:0008987 | MF | 1 | GO:0018669 | MF | 1 |
| GO:0031132 | MF | 1 | GO:0047570 | MF | 1 | GO:0047575 | MF | 1 | GO:0003987 | MF | 1 | GO:0016212 | MF | 1 |
| GO:0004605 | MF | 1 | GO:0003724 | MF | 1 | GO:0004325 | MF | 1 | GO:0140132 | MF | 1 | GO:0034029 | MF | 1 |
| GO:0031403 | MF | 1 | GO:0051991 | MF | 1 | GO:0036220 | MF | 1 | GO:0047451 | MF | 1 | GO:0008881 | MF | 1 |
| GO:0004825 | MF | 1 | GO:0050020 | MF | 1 | GO:0004673 | MF | 1 | GO:0030848 | MF | 1 | GO:0033721 | MF | 1 |
| GO:0003964 | MF | 1 | GO:0008734 | MF | 1 | GO:0045301 | MF | 1 | GO:0046573 | MF | 1 | GO:0004013 | MF | 1 |
| GO:0047512 | MF | 1 | GO:0008381 | MF | 1 | GO:0018635 | MF | 1 | GO:0008831 | MF | 1 | GO:0018479 | MF | 1 |
| GO:0045145 | MF | 1 | GO:0000210 | MF | 1 | GO:0004592 | MF | 1 | GO:0050518 | MF | 1 | GO:0050303 | MF | 1 |
| GO:0036222 | MF | 1 | GO:0016863 | MF | 1 | GO:0042301 | MF | 1 | GO:0004298 | MF | 1 | GO:0003984 | MF | 1 |
| GO:0016682 | MF | 1 | GO:0004852 | MF | 1 | GO:0004521 | MF | 1 | GO:0002134 | MF | 1 | GO:0004613 | MF | 1 |
| GO:0009014 | MF | 1 | GO:0005328 | MF | 1 | GO:0008796 | MF | 1 | GO:0019148 | MF | 1 | GO:0016901 | MF | 1 |
| GO:0016646 | MF | 1 | GO:0102007 | MF | 1 | GO:0004615 | MF | 1 | GO:0004630 | MF | 1 | GO:0046820 | MF | 1 |
| GO:0008831 | MF | 1 | GO:0017151 | MF | 1 | GO:0103045 | MF | 1 | GO:0055041 | MF | 1 | GO:0019159 | MF | 1 |
| GO:0050100 | MF | 1 | GO:0015103 | MF | 1 | GO:0017108 | MF | 1 | GO:0047653 | MF | 1 | GO:0004672 | MF | 1 |
| GO:0004021 | MF | 1 | GO:0009975 | MF | 1 | GO:0016691 | MF | 1 | GO:0103117 | MF | 1 | GO:0004079 | MF | 1 |
| GO:0090483 | MF | 1 | GO:0004605 | MF | 1 | GO:0043273 | MF | 1 | GO:0003978 | MF | 1 | GO:0005267 | MF | 1 |
| GO:0004180 | MF | 1 | GO:0016159 | MF | 1 | GO:0035438 | MF | 1 | GO:0008687 | MF | 1 | GO:0070626 | MF | 1 |
| GO:0051992 | MF | 1 | GO:0008705 | MF | 1 | GO:0070181 | MF | 1 | GO:0102308 | MF | 1 | GO:0004073 | MF | 1 |
| GO:0052666 | MF | 1 | GO:0003950 | MF | 1 | GO:0008873 | MF | 1 | GO:0043168 | MF | 1 | GO:0016682 | MF | 1 |
| GO:0042277 | MF | 1 | GO:0005298 | MF | 1 | GO:0047200 | MF | 1 | GO:0004037 | MF | 1 | GO:0003729 | MF | 1 |
| GO:0008962 | MF | 1 | GO:0090483 | MF | 1 | GO:0005253 | MF | 1 | GO:0004112 | MF | 1 | GO:0009039 | MF | 1 |
| GO:0004847 | MF | 1 | GO:0046553 | MF | 1 | GO:0004326 | MF | 1 | GO:0018732 | MF | 1 | GO:0003960 | MF | 1 |
| GO:0008996 | MF | 1 | GO:0004459 | MF | 1 | GO:0008252 | MF | 1 | GO:0003952 | MF | 1 | GO:0008988 | MF | 1 |

|            |    |   |            |    |   |            |    |   |            |    |   |            |    |   |
|------------|----|---|------------|----|---|------------|----|---|------------|----|---|------------|----|---|
| GO:0004719 | MF | 1 | GO:0032549 | MF | 1 | GO:0016742 | MF | 1 | GO:0008175 | MF | 1 | GO:0047681 | MF | 1 |
| GO:0008534 | MF | 1 | GO:0003959 | MF | 1 | GO:0004355 | MF | 1 | GO:0016992 | MF | 1 | GO:0044318 | MF | 1 |
| GO:0035870 | MF | 1 | GO:0030272 | MF | 1 | GO:0031992 | MF | 1 | GO:0070401 | MF | 1 | GO:0047100 | MF | 1 |
| GO:0017089 | MF | 1 | GO:0004042 | MF | 1 | GO:0015565 | MF | 1 | GO:0004847 | MF | 1 | GO:0033983 | MF | 1 |
| GO:0003952 | MF | 1 | GO:0008933 | MF | 1 | GO:0004070 | MF | 1 | GO:0016668 | MF | 1 | GO:0036524 | MF | 1 |
| GO:0008470 | MF | 1 | GO:0017168 | MF | 1 | GO:0004047 | MF | 1 | GO:0032453 | MF | 1 | GO:0050570 | MF | 1 |
| GO:0008825 | MF | 1 | GO:0047575 | MF | 1 | GO:0047536 | MF | 1 | GO:0004055 | MF | 1 | GO:0008759 | MF | 1 |
| GO:0008679 | MF | 1 | GO:0004325 | MF | 1 | GO:0016279 | MF | 1 | GO:0004822 | MF | 1 | GO:0008925 | MF | 1 |
| GO:0004488 | MF | 1 | GO:0036220 | MF | 1 | GO:0008959 | MF | 1 | GO:0008441 | MF | 1 | GO:0015210 | MF | 1 |
| GO:0052929 | MF | 1 | GO:0004673 | MF | 1 | GO:0008953 | MF | 1 | GO:0061710 | MF | 1 | GO:0044183 | MF | 1 |
| GO:0008693 | MF | 1 | GO:0045301 | MF | 1 | GO:0008696 | MF | 1 | GO:0003919 | MF | 1 | GO:0015109 | MF | 1 |
| GO:0016846 | MF | 1 | GO:0018635 | MF | 1 | GO:0008676 | MF | 1 | GO:0016301 | MF | 1 | GO:0004359 | MF | 1 |
| GO:0015175 | MF | 1 | GO:0004592 | MF | 1 | GO:0004165 | MF | 1 | GO:0016410 | MF | 1 | GO:0015185 | MF | 1 |
| GO:0015655 | MF | 1 | GO:0042301 | MF | 1 | GO:0015424 | MF | 1 | GO:0008864 | MF | 1 | GO:0003883 | MF | 1 |
| GO:0018802 | MF | 1 | GO:0004521 | MF | 1 | GO:0061579 | MF | 1 | GO:0008963 | MF | 1 | GO:0052929 | MF | 1 |
| GO:0001681 | MF | 1 | GO:0008796 | MF | 1 | GO:0051499 | MF | 1 | GO:0070180 | MF | 1 | GO:0008948 | MF | 1 |
| GO:0004078 | MF | 1 | GO:0004615 | MF | 1 | GO:0004045 | MF | 1 | GO:0034386 | MF | 1 | GO:0019825 | MF | 1 |
| GO:0047516 | MF | 1 | GO:0103045 | MF | 1 | GO:0001512 | MF | 1 | GO:0004722 | MF | 1 | GO:0008745 | MF | 1 |
| GO:0052587 | MF | 1 | GO:0017108 | MF | 1 | GO:0018849 | MF | 1 | GO:0015437 | MF | 1 | GO:0003697 | MF | 1 |
| GO:0051991 | MF | 1 | GO:0016691 | MF | 1 | GO:0018662 | MF | 1 | GO:0004419 | MF | 1 | GO:0035539 | MF | 1 |
| GO:0036054 | MF | 1 | GO:0043273 | MF | 1 | GO:0050297 | MF | 1 | GO:0008470 | MF | 1 | GO:0016872 | MF | 1 |
| GO:0018492 | MF | 1 | GO:0035438 | MF | 1 | GO:0004115 | MF | 1 | GO:0004846 | MF | 1 | GO:0018583 | MF | 1 |
| GO:0002161 | MF | 1 | GO:0070181 | MF | 1 | GO:0051745 | MF | 1 | GO:0004357 | MF | 1 | GO:0097163 | MF | 1 |
| GO:0004588 | MF | 1 | GO:0008873 | MF | 1 | GO:0003957 | MF | 1 | GO:0051117 | MF | 1 | GO:0042970 | MF | 1 |
| GO:0016813 | MF | 1 | GO:0047200 | MF | 1 | GO:0034458 | MF | 1 | GO:0008827 | MF | 1 | GO:0004853 | MF | 1 |
| GO:0004489 | MF | 1 | GO:0005253 | MF | 1 | GO:0046353 | MF | 1 | GO:0016168 | MF | 1 | GO:0036307 | MF | 1 |
| GO:0016879 | MF | 1 | GO:0004326 | MF | 1 | GO:0030145 | MF | 1 | GO:0003964 | MF | 1 | GO:0004068 | MF | 1 |
| GO:0140132 | MF | 1 | GO:0008252 | MF | 1 | GO:0004854 | MF | 1 | GO:0015412 | MF | 1 | GO:0016980 | MF | 1 |
| GO:0004398 | MF | 1 | GO:0016742 | MF | 1 | GO:0003908 | MF | 1 | GO:0008173 | MF | 1 | GO:0050355 | MF | 1 |
| GO:0050580 | MF | 1 | GO:0004355 | MF | 1 | GO:0030371 | MF | 1 | GO:0008996 | MF | 1 | GO:0018548 | MF | 1 |
| GO:0043824 | MF | 1 | GO:0031992 | MF | 1 | GO:0004787 | MF | 1 | GO:0032136 | MF | 1 | GO:0005198 | MF | 1 |
| GO:0051864 | MF | 1 | GO:0015565 | MF | 1 | GO:0004730 | MF | 1 | GO:0004032 | MF | 1 | GO:0004129 | MF | 1 |
| GO:0003860 | MF | 1 | GO:0004070 | MF | 1 | GO:0003867 | MF | 1 | GO:0004715 | MF | 1 | GO:0047949 | MF | 1 |
| GO:0009017 | MF | 1 | GO:0004047 | MF | 1 | GO:0033737 | MF | 1 | GO:0035870 | MF | 1 | GO:0004367 | MF | 1 |
| GO:0008762 | MF | 1 | GO:0047536 | MF | 1 | GO:0004488 | MF | 1 | GO:0005295 | MF | 1 | GO:0004529 | MF | 1 |
| GO:0050572 | MF | 1 | GO:0016279 | MF | 1 | GO:0061711 | MF | 1 | GO:0103039 | MF | 1 | GO:0008782 | MF | 1 |
| GO:0004647 | MF | 1 | GO:0008959 | MF | 1 | GO:0004801 | MF | 1 | GO:0033890 | MF | 1 | GO:0044715 | MF | 1 |
| GO:0008853 | MF | 1 | GO:0008953 | MF | 1 | GO:0003899 | MF | 1 | GO:0008795 | MF | 1 | GO:0097216 | MF | 1 |
| GO:0004591 | MF | 1 | GO:0008696 | MF | 1 | GO:0016437 | MF | 1 | GO:0008649 | MF | 1 | GO:0004106 | MF | 1 |
| GO:0015385 | MF | 1 | GO:0008676 | MF | 1 | GO:0050555 | MF | 1 | GO:0035599 | MF | 1 | GO:0051266 | MF | 1 |
| GO:0005198 | MF | 1 | GO:0004165 | MF | 1 | GO:0004352 | MF | 1 | GO:0008830 | MF | 1 | GO:0043815 | MF | 1 |
| GO:0042602 | MF | 1 | GO:0015424 | MF | 1 | GO:0008919 | MF | 1 | GO:0008781 | MF | 1 | GO:0008379 | MF | 1 |
| GO:0051116 | MF | 1 | GO:0061579 | MF | 1 | GO:0004190 | MF | 1 | GO:0008855 | MF | 1 | GO:0005280 | MF | 1 |
| GO:0102523 | MF | 1 | GO:0051499 | MF | 1 | GO:0003911 | MF | 1 | GO:0033819 | MF | 1 | GO:0015294 | MF | 1 |
| GO:0003849 | MF | 1 | GO:0004045 | MF | 1 | GO:0051538 | MF | 1 | GO:0004140 | MF | 1 | GO:0008239 | MF | 1 |

|            |    |   |            |    |   |            |    |   |            |    |   |            |    |   |
|------------|----|---|------------|----|---|------------|----|---|------------|----|---|------------|----|---|
| GO:0070335 | MF | 1 | GO:0001512 | MF | 1 | GO:0004497 | MF | 1 | GO:0008296 | MF | 1 | GO:0047533 | MF | 1 |
| GO:0004141 | MF | 1 | GO:0018849 | MF | 1 | GO:0003849 | MF | 1 | GO:0016813 | MF | 1 | GO:0001681 | MF | 1 |
| GO:0004362 | MF | 1 | GO:0018662 | MF | 1 | GO:0004334 | MF | 1 | GO:0052923 | MF | 1 | GO:0016671 | MF | 1 |
| GO:0102543 | MF | 1 | GO:0050297 | MF | 1 | GO:0003910 | MF | 1 | GO:0016798 | MF | 1 | GO:0042912 | MF | 1 |
| GO:0004617 | MF | 1 | GO:0004115 | MF | 1 | GO:0004018 | MF | 1 | GO:0008271 | MF | 1 | GO:0015430 | MF | 1 |
| GO:0103039 | MF | 1 | GO:0051745 | MF | 1 | GO:0017111 | MF | 1 | GO:0004358 | MF | 1 | GO:0008324 | MF | 1 |
| GO:0050303 | MF | 1 | GO:0003957 | MF | 1 | GO:0036374 | MF | 1 | GO:0001530 | MF | 1 | GO:0005247 | MF | 1 |
| GO:0043799 | MF | 1 | GO:0034458 | MF | 1 | GO:0050480 | MF | 1 | GO:0047485 | MF | 1 | GO:0050308 | MF | 1 |
| GO:0000030 | MF | 1 | GO:0046353 | MF | 1 | GO:0070404 | MF | 1 | GO:0009037 | MF | 1 | GO:0008111 | MF | 1 |
| GO:0004018 | MF | 1 | GO:0030145 | MF | 1 | GO:0070290 | MF | 1 | GO:0015499 | MF | 1 | GO:0031404 | MF | 1 |
| GO:0016672 | MF | 1 | GO:0004854 | MF | 1 | GO:0103011 | MF | 1 | GO:0004818 | MF | 1 | GO:0004820 | MF | 1 |
| GO:0004357 | MF | 1 | GO:0003908 | MF | 1 | GO:0050565 | MF | 1 | GO:0004831 | MF | 1 | GO:0008509 | MF | 1 |
| GO:0004108 | MF | 1 | GO:0030371 | MF | 1 | GO:0050483 | MF | 1 | GO:0044667 | MF | 1 | GO:0008899 | MF | 1 |
| GO:0034567 | MF | 1 | GO:0004787 | MF | 1 | GO:0004775 | MF | 1 | GO:0047456 | MF | 1 | GO:0080130 | MF | 1 |
| GO:0003911 | MF | 1 | GO:0004730 | MF | 1 | GO:0000179 | MF | 1 | GO:0016849 | MF | 1 | GO:0052881 | MF | 1 |
| GO:0051903 | MF | 1 | GO:0003867 | MF | 1 | GO:0031403 | MF | 1 | GO:0004354 | MF | 1 | GO:0004333 | MF | 1 |
| GO:0015075 | MF | 1 | GO:0033737 | MF | 1 | GO:0008738 | MF | 1 | GO:0008999 | MF | 1 | GO:0050380 | MF | 1 |
| GO:0004068 | MF | 1 | GO:0004488 | MF | 1 | GO:0016846 | MF | 1 | GO:0018659 | MF | 1 | GO:0018826 | MF | 1 |
| GO:0102007 | MF | 1 | GO:0061711 | MF | 1 | GO:0003756 | MF | 1 | GO:0071424 | MF | 1 | GO:0004664 | MF | 1 |
| GO:0004419 | MF | 1 | GO:0004801 | MF | 1 | GO:0003887 | MF | 1 | GO:0102040 | MF | 1 | GO:0009046 | MF | 1 |
| GO:0008409 | MF | 1 | GO:0003899 | MF | 1 | GO:0005047 | MF | 1 | GO:0018802 | MF | 1 | GO:0030604 | MF | 1 |
| GO:0052908 | MF | 1 | GO:0016437 | MF | 1 | GO:0043138 | MF | 1 | GO:0008914 | MF | 1 | GO:0016154 | MF | 1 |
| GO:0005253 | MF | 1 | GO:0050555 | MF | 1 | GO:0019171 | MF | 1 | GO:0016223 | MF | 1 | GO:0004107 | MF | 1 |
| GO:0016597 | MF | 1 | GO:0004352 | MF | 1 | GO:0008237 | MF | 1 | GO:0004360 | MF | 1 | GO:0004019 | MF | 1 |
| GO:0070626 | MF | 1 | GO:0008919 | MF | 1 | GO:0009016 | MF | 1 | GO:0033732 | MF | 1 | GO:0004633 | MF | 1 |
| GO:0004595 | MF | 1 | GO:0004190 | MF | 1 | GO:0048037 | MF | 1 | GO:0000985 | MF | 1 | GO:0050560 | MF | 1 |
| GO:0097367 | MF | 1 | GO:0003911 | MF | 1 | GO:0008556 | MF | 1 | GO:0051116 | MF | 1 | GO:0003961 | MF | 1 |
| GO:0008870 | MF | 1 | GO:0051538 | MF | 1 | GO:0019145 | MF | 1 | GO:0000014 | MF | 1 | GO:0102391 | MF | 1 |
| GO:0008410 | MF | 1 | GO:0004497 | MF | 1 | GO:0003862 | MF | 1 | GO:0004418 | MF | 1 | GO:0036380 | MF | 1 |
| GO:0003896 | MF | 1 | GO:0003849 | MF | 1 | GO:0000030 | MF | 1 | GO:0047196 | MF | 1 | GO:0060090 | MF | 1 |
| GO:0003996 | MF | 1 | GO:0004334 | MF | 1 | GO:0005345 | MF | 1 | GO:0016841 | MF | 1 | GO:0015440 | MF | 1 |
| GO:0000721 | MF | 1 | GO:0003910 | MF | 1 | GO:0000036 | MF | 1 | GO:0070063 | MF | 1 | GO:0043199 | MF | 1 |
| GO:0004742 | MF | 1 | GO:0015562 | MF | 1 | GO:0018580 | MF | 1 | GO:0004534 | MF | 1 | GO:0019146 | MF | 1 |
| GO:0070401 | MF | 1 | GO:0004018 | MF | 1 | GO:0045303 | MF | 1 | GO:0004455 | MF | 1 | GO:0004085 | MF | 1 |
| GO:0019104 | MF | 1 | GO:0017111 | MF | 1 | GO:0101006 | MF | 1 | GO:0004030 | MF | 1 | GO:0016152 | MF | 1 |
| GO:0004067 | MF | 1 | GO:0036374 | MF | 1 | GO:0030552 | MF | 1 | GO:0019531 | MF | 1 | GO:1903231 | MF | 1 |
| GO:0052832 | MF | 1 | GO:0050480 | MF | 1 | GO:0051075 | MF | 1 | GO:0004819 | MF | 1 | GO:0050232 | MF | 1 |
| GO:0004563 | MF | 1 | GO:0070404 | MF | 1 | GO:0008808 | MF | 1 | GO:0004057 | MF | 1 | GO:0000703 | MF | 1 |
| GO:0004016 | MF | 1 | GO:0070290 | MF | 1 | GO:0016655 | MF | 1 | GO:0004824 | MF | 1 | GO:0003743 | MF | 1 |
| GO:0015658 | MF | 1 | GO:0103011 | MF | 1 | GO:0052589 | MF | 1 | GO:0050385 | MF | 1 | GO:0034979 | MF | 1 |
| GO:0018687 | MF | 1 | GO:0050565 | MF | 1 | GO:0004385 | MF | 1 | GO:0008876 | MF | 1 | GO:0102130 | MF | 1 |
| GO:0043725 | MF | 1 | GO:0050483 | MF | 1 | GO:0047954 | MF | 1 | GO:0008684 | MF | 1 | GO:0008871 | MF | 1 |
| GO:0004392 | MF | 1 | GO:0004775 | MF | 1 | GO:0009973 | MF | 1 | GO:0103015 | MF | 1 | GO:0004075 | MF | 1 |
| GO:0004037 | MF | 1 | GO:0000179 | MF | 1 | GO:0009012 | MF | 1 | GO:0004485 | MF | 1 | GO:0008531 | MF | 1 |
| GO:0043295 | MF | 1 | GO:0031403 | MF | 1 | GO:0016811 | MF | 1 | GO:0004632 | MF | 1 | GO:0005384 | MF | 1 |

|            |    |   |            |    |   |            |    |   |            |    |   |            |    |   |
|------------|----|---|------------|----|---|------------|----|---|------------|----|---|------------|----|---|
| GO:0005298 | MF | 1 | GO:0008738 | MF | 1 | GO:0002161 | MF | 1 | GO:0102307 | MF | 1 | GO:0030234 | MF | 1 |
| GO:0008795 | MF | 1 | GO:0016846 | MF | 1 | GO:0043024 | MF | 1 | GO:0000701 | MF | 1 | GO:0004084 | MF | 1 |
| GO:0004150 | MF | 1 | GO:0003756 | MF | 1 | GO:0043750 | MF | 1 | GO:0042586 | MF | 1 | GO:0051920 | MF | 1 |
| GO:0051117 | MF | 1 | GO:0003887 | MF | 1 | GO:0015087 | MF | 1 | GO:0009015 | MF | 1 | GO:0070042 | MF | 1 |
| GO:0034257 | MF | 1 | GO:0008094 | MF | 1 | GO:0016780 | MF | 1 | GO:0033971 | MF | 1 | GO:0016790 | MF | 1 |
| GO:0045340 | MF | 1 | GO:0005047 | MF | 1 | GO:0047480 | MF | 1 | GO:0005548 | MF | 1 | GO:0004614 | MF | 1 |
| GO:0008738 | MF | 1 | GO:0043138 | MF | 1 | GO:0050540 | MF | 1 | GO:0019168 | MF | 1 | GO:0016645 | MF | 1 |
| GO:0140078 | MF | 1 | GO:0019171 | MF | 1 | GO:0004451 | MF | 1 | GO:0003877 | MF | 1 | GO:0047434 | MF | 1 |
| GO:0047964 | MF | 1 | GO:0008237 | MF | 1 | GO:0004478 | MF | 1 | GO:0050519 | MF | 1 | GO:0004399 | MF | 1 |
| GO:0015505 | MF | 1 | GO:0009016 | MF | 1 | GO:0043878 | MF | 1 | GO:0043022 | MF | 1 | GO:0003916 | MF | 1 |
| GO:0003978 | MF | 1 | GO:0008556 | MF | 1 | GO:0016776 | MF | 1 | GO:0051787 | MF | 1 | GO:0000287 | MF | 1 |
| GO:0008531 | MF | 1 | GO:0019145 | MF | 1 | GO:0008693 | MF | 1 | GO:0003906 | MF | 1 | GO:0052717 | MF | 1 |
| GO:0033890 | MF | 1 | GO:0003862 | MF | 1 | GO:0004527 | MF | 1 | GO:0045145 | MF | 1 | GO:0008408 | MF | 1 |
| GO:0016645 | MF | 1 | GO:0000030 | MF | 1 | GO:0017116 | MF | 1 | GO:0004828 | MF | 1 | GO:0016597 | MF | 1 |
| GO:0016773 | MF | 1 | GO:0005345 | MF | 1 | GO:0008966 | MF | 1 | GO:0003855 | MF | 1 | GO:0004794 | MF | 1 |
| GO:0015930 | MF | 1 | GO:0000036 | MF | 1 | GO:0005324 | MF | 1 | GO:0008761 | MF | 1 | GO:0033739 | MF | 1 |
| GO:0004664 | MF | 1 | GO:0018580 | MF | 1 | GO:0052913 | MF | 1 | GO:0035312 | MF | 1 | GO:0015141 | MF | 1 |
| GO:0047936 | MF | 1 | GO:0045303 | MF | 1 | GO:0004466 | MF | 1 | GO:0015211 | MF | 1 | GO:0102420 | MF | 1 |
| GO:0008115 | MF | 1 | GO:0101006 | MF | 1 | GO:0008186 | MF | 1 | GO:0004349 | MF | 1 | GO:0003941 | MF | 1 |
| GO:0033592 | MF | 1 | GO:0030552 | MF | 1 | GO:0018667 | MF | 1 | GO:0047091 | MF | 1 | GO:0004064 | MF | 1 |
| GO:0035595 | MF | 1 | GO:0051075 | MF | 1 | GO:0052655 | MF | 1 | GO:0030151 | MF | 1 | GO:0034024 | MF | 1 |
| GO:0005385 | MF | 1 | GO:0008808 | MF | 1 | GO:0004523 | MF | 1 | GO:0051073 | MF | 1 | GO:0016209 | MF | 1 |
| GO:0008676 | MF | 1 | GO:0016655 | MF | 1 | GO:0008853 | MF | 1 | GO:0004341 | MF | 1 | GO:0047617 | MF | 1 |
| GO:0008495 | MF | 1 | GO:0052589 | MF | 1 | GO:0008047 | MF | 1 | GO:0102009 | MF | 1 | GO:0052601 | MF | 1 |
| GO:0004169 | MF | 1 | GO:0004385 | MF | 1 | GO:0008918 | MF | 1 | GO:0008710 | MF | 1 | GO:0009027 | MF | 1 |
| GO:0004754 | MF | 1 | GO:0047954 | MF | 1 | GO:0052915 | MF | 1 | GO:0003977 | MF | 1 | GO:0050548 | MF | 1 |
| GO:0008175 | MF | 1 | GO:0016836 | MF | 1 | GO:0008964 | MF | 1 | GO:0004657 | MF | 1 | GO:0016989 | MF | 1 |
| GO:0051745 | MF | 1 | GO:0009973 | MF | 1 | GO:0003842 | MF | 1 | GO:0009381 | MF | 1 | GO:0097718 | MF | 1 |
| GO:0008976 | MF | 1 | GO:0009012 | MF | 1 | GO:0043755 | MF | 1 | GO:0004144 | MF | 1 | GO:0047545 | MF | 1 |
| GO:0034386 | MF | 1 | GO:0016811 | MF | 1 | GO:0009036 | MF | 1 | GO:0008730 | MF | 1 | GO:0008803 | MF | 1 |
| GO:0110153 | MF | 1 | GO:0002161 | MF | 1 | GO:0004089 | MF | 1 | GO:0043824 | MF | 1 | GO:0004141 | MF | 1 |
| GO:0004473 | MF | 1 | GO:0043024 | MF | 1 | GO:0008924 | MF | 1 | GO:0005304 | MF | 1 | GO:0008780 | MF | 1 |
| GO:0103011 | MF | 1 | GO:0043750 | MF | 1 | GO:0004222 | MF | 1 | GO:0003896 | MF | 1 | GO:0102966 | MF | 1 |
| GO:0016793 | MF | 1 | GO:0015087 | MF | 1 | GO:0031071 | MF | 1 | GO:0004604 | MF | 1 | GO:0003725 | MF | 1 |
| GO:0000210 | MF | 1 | GO:0016780 | MF | 1 | GO:0018669 | MF | 1 | GO:0043731 | MF | 1 | GO:0015473 | MF | 1 |
| GO:0008752 | MF | 1 | GO:0047480 | MF | 1 | GO:0016212 | MF | 1 | GO:0046917 | MF | 1 | GO:0015220 | MF | 1 |
| GO:0003887 | MF | 1 | GO:0050540 | MF | 1 | GO:0052591 | MF | 1 | GO:0004499 | MF | 1 | GO:0051536 | MF | 1 |
| GO:0008874 | MF | 1 | GO:0004451 | MF | 1 | GO:0034029 | MF | 1 | GO:0018817 | MF | 1 | GO:0015462 | MF | 1 |
| GO:0036042 | MF | 1 | GO:0004478 | MF | 1 | GO:0008881 | MF | 1 | GO:0008995 | MF | 1 | GO:0089714 | MF | 1 |
| GO:0000310 | MF | 1 | GO:0043878 | MF | 1 | GO:0033721 | MF | 1 | GO:0043864 | MF | 1 | GO:0102099 | MF | 1 |
|            |    |   | GO:0016776 | MF | 1 | GO:0019904 | MF | 1 | GO:0008961 | MF | 1 | GO:0008428 | MF | 1 |
|            |    |   | GO:0008693 | MF | 1 | GO:0018479 | MF | 1 | GO:0047955 | MF | 1 | GO:0010285 | MF | 1 |
|            |    |   | GO:0004527 | MF | 1 | GO:0050303 | MF | 1 | GO:0033966 | MF | 1 | GO:0008113 | MF | 1 |
|            |    |   | GO:0003688 | MF | 1 | GO:0000900 | MF | 1 | GO:0000400 | MF | 1 | GO:0008375 | MF | 1 |
|            |    |   | GO:0017116 | MF | 1 | GO:0003984 | MF | 1 | GO:0008932 | MF | 1 | GO:0047134 | MF | 1 |

|            |    |   |            |    |   |            |    |   |            |    |   |
|------------|----|---|------------|----|---|------------|----|---|------------|----|---|
| GO:0008966 | MF | 1 | GO:0004613 | MF | 1 | GO:0018785 | MF | 1 | GO:0004347 | MF | 1 |
| GO:0005324 | MF | 1 | GO:0016901 | MF | 1 | GO:0004109 | MF | 1 | GO:0003962 | MF | 1 |
| GO:0052913 | MF | 1 | GO:0046820 | MF | 1 | GO:0018834 | MF | 1 | GO:0051082 | MF | 1 |
| GO:0004466 | MF | 1 | GO:0019159 | MF | 1 | GO:0061598 | MF | 1 | GO:0047964 | MF | 1 |
| GO:0008186 | MF | 1 | GO:0004672 | MF | 1 | GO:0047975 | MF | 1 | GO:0036361 | MF | 1 |
| GO:0042959 | MF | 1 | GO:0004079 | MF | 1 | GO:0005350 | MF | 1 | GO:0048474 | MF | 1 |
| GO:0018667 | MF | 1 | GO:0005267 | MF | 1 | GO:0008675 | MF | 1 | GO:0004372 | MF | 1 |
| GO:0052655 | MF | 1 | GO:0070626 | MF | 1 | GO:0003866 | MF | 1 | GO:0008841 | MF | 1 |
| GO:0004523 | MF | 1 | GO:0004073 | MF | 1 | GO:0050066 | MF | 1 | GO:0017057 | MF | 1 |
| GO:0008853 | MF | 1 | GO:0016682 | MF | 1 | GO:0061605 | MF | 1 | GO:0004414 | MF | 1 |
| GO:0008047 | MF | 1 | GO:0003729 | MF | 1 | GO:0033817 | MF | 1 | GO:0016888 | MF | 1 |
| GO:0008918 | MF | 1 | GO:0009039 | MF | 1 | GO:0008903 | MF | 1 | GO:0016995 | MF | 1 |
| GO:0052915 | MF | 1 | GO:0003960 | MF | 1 | GO:0016726 | MF | 1 | GO:0050580 | MF | 1 |
| GO:0008964 | MF | 1 | GO:0008177 | MF | 1 | GO:0036042 | MF | 1 | GO:0043546 | MF | 1 |
| GO:0003842 | MF | 1 | GO:0008988 | MF | 1 | GO:0102100 | MF | 1 | GO:0051864 | MF | 1 |
| GO:0043755 | MF | 1 | GO:0047681 | MF | 1 | GO:0015112 | MF | 1 | GO:0015093 | MF | 1 |
| GO:0009036 | MF | 1 | GO:0044318 | MF | 1 | GO:0047407 | MF | 1 | GO:0008851 | MF | 1 |
| GO:0004089 | MF | 1 | GO:0047100 | MF | 1 | GO:0004078 | MF | 1 | GO:0080030 | MF | 1 |
| GO:0008924 | MF | 1 | GO:0033983 | MF | 1 | GO:0015411 | MF | 1 | GO:0004422 | MF | 1 |
| GO:0004222 | MF | 1 | GO:0036524 | MF | 1 | GO:0051087 | MF | 1 | GO:0008720 | MF | 1 |
| GO:0031071 | MF | 1 | GO:0050570 | MF | 1 | GO:0033818 | MF | 1 | GO:0005509 | MF | 1 |
| GO:0018669 | MF | 1 | GO:0008759 | MF | 1 | GO:0044716 | MF | 1 | GO:0070968 | MF | 1 |
| GO:0016212 | MF | 1 | GO:0008925 | MF | 1 | GO:0140306 | MF | 1 | GO:0015183 | MF | 1 |
| GO:0052591 | MF | 1 | GO:0015210 | MF | 1 | GO:0008967 | MF | 1 | GO:0018742 | MF | 1 |
| GO:0034029 | MF | 1 | GO:0044183 | MF | 1 | GO:0004021 | MF | 1 | GO:0033229 | MF | 1 |
| GO:0008881 | MF | 1 | GO:0015109 | MF | 1 | GO:0004641 | MF | 1 | GO:0004479 | MF | 1 |
| GO:0033721 | MF | 1 | GO:0030611 | MF | 1 | GO:0052911 | MF | 1 | GO:0008748 | MF | 1 |
| GO:0004013 | MF | 1 | GO:0004359 | MF | 1 | GO:0004655 | MF | 1 | GO:0008892 | MF | 1 |
| GO:0018479 | MF | 1 | GO:0015185 | MF | 1 | GO:0004792 | MF | 1 | GO:0004146 | MF | 1 |
| GO:0050303 | MF | 1 | GO:0003883 | MF | 1 | GO:0016879 | MF | 1 | GO:0015123 | MF | 1 |
| GO:0000900 | MF | 1 | GO:0052929 | MF | 1 | GO:0042944 | MF | 1 | GO:0004590 | MF | 1 |
| GO:0003984 | MF | 1 | GO:0008948 | MF | 1 | GO:0050511 | MF | 1 | GO:0047429 | MF | 1 |
| GO:0071723 | MF | 1 | GO:0019825 | MF | 1 | GO:0004022 | MF | 1 | GO:0043621 | MF | 1 |
| GO:0004613 | MF | 1 | GO:0008745 | MF | 1 | GO:0008689 | MF | 1 | GO:0015199 | MF | 1 |
| GO:0016901 | MF | 1 | GO:0003697 | MF | 1 | GO:0008764 | MF | 1 | GO:0008870 | MF | 1 |
| GO:0046820 | MF | 1 | GO:0035539 | MF | 1 | GO:0030378 | MF | 1 | GO:0018687 | MF | 1 |
| GO:0019159 | MF | 1 | GO:0052590 | MF | 1 | GO:0008821 | MF | 1 | GO:0030429 | MF | 1 |
| GO:0004672 | MF | 1 | GO:0016872 | MF | 1 | GO:0008885 | MF | 1 | GO:0047919 | MF | 1 |
| GO:0004079 | MF | 1 | GO:0018583 | MF | 1 | GO:0052833 | MF | 1 | GO:0102953 | MF | 1 |
| GO:0005267 | MF | 1 | GO:0097163 | MF | 1 | GO:0008260 | MF | 1 | GO:0046983 | MF | 1 |
| GO:0070626 | MF | 1 | GO:0015385 | MF | 1 | GO:0004540 | MF | 1 | GO:0004525 | MF | 1 |
| GO:0004073 | MF | 1 | GO:0042970 | MF | 1 | GO:0003994 | MF | 1 | GO:0004588 | MF | 1 |
| GO:0016682 | MF | 1 | GO:0004853 | MF | 1 | GO:0032977 | MF | 1 | GO:0004764 | MF | 1 |
| GO:0003729 | MF | 1 | GO:0036307 | MF | 1 | GO:0004634 | MF | 1 | GO:0047895 | MF | 1 |
| GO:0009039 | MF | 1 | GO:0004068 | MF | 1 | GO:0008942 | MF | 1 | GO:0016868 | MF | 1 |

|            |    |   |            |    |   |            |    |   |            |    |   |
|------------|----|---|------------|----|---|------------|----|---|------------|----|---|
| GO:0003960 | MF | 1 | GO:0016980 | MF | 1 | GO:0034336 | MF | 1 | GO:0047925 | MF | 1 |
| GO:0008177 | MF | 1 | GO:0050355 | MF | 1 | GO:0004016 | MF | 1 | GO:0050334 | MF | 1 |
| GO:0008988 | MF | 1 | GO:0018548 | MF | 1 | GO:0004076 | MF | 1 | GO:0016881 | MF | 1 |
| GO:0047681 | MF | 1 | GO:0005198 | MF | 1 | GO:0015667 | MF | 1 | GO:0018775 | MF | 1 |
| GO:0044318 | MF | 1 | GO:0004129 | MF | 1 | GO:0044466 | MF | 1 | GO:0003986 | MF | 1 |
| GO:0047100 | MF | 1 | GO:0047949 | MF | 1 | GO:0050572 | MF | 1 | GO:0008930 | MF | 1 |
| GO:0033983 | MF | 1 | GO:0004367 | MF | 1 | GO:0004742 | MF | 1 | GO:0050048 | MF | 1 |
| GO:0036524 | MF | 1 | GO:0004529 | MF | 1 | GO:0016903 | MF | 1 | GO:0004595 | MF | 1 |
| GO:0050570 | MF | 1 | GO:0044715 | MF | 1 | GO:0004151 | MF | 1 | GO:0043785 | MF | 1 |
| GO:0008759 | MF | 1 | GO:0097216 | MF | 1 | GO:0052740 | MF | 1 | GO:0015505 | MF | 1 |
| GO:0008925 | MF | 1 | GO:0004106 | MF | 1 | GO:0015184 | MF | 1 | GO:0036009 | MF | 1 |
| GO:0015210 | MF | 1 | GO:0051266 | MF | 1 | GO:0008700 | MF | 1 | GO:0004473 | MF | 1 |
| GO:0044183 | MF | 1 | GO:0043815 | MF | 1 | GO:0003949 | MF | 1 | GO:0004356 | MF | 1 |
| GO:0015109 | MF | 1 | GO:0008379 | MF | 1 | GO:0034634 | MF | 1 | GO:1990238 | MF | 1 |
| GO:0030611 | MF | 1 | GO:0005280 | MF | 1 | GO:0004317 | MF | 1 | GO:0004489 | MF | 1 |
| GO:0004359 | MF | 1 | GO:0015294 | MF | 1 | GO:0005085 | MF | 1 | GO:0003939 | MF | 1 |
| GO:0015185 | MF | 1 | GO:0008239 | MF | 1 | GO:0046873 | MF | 1 | GO:0008987 | MF | 1 |
| GO:0003883 | MF | 1 | GO:0008753 | MF | 1 | GO:0102008 | MF | 1 | GO:0003987 | MF | 1 |
| GO:0052929 | MF | 1 | GO:0047533 | MF | 1 | GO:0004814 | MF | 1 | GO:0140132 | MF | 1 |
| GO:0008948 | MF | 1 | GO:0001681 | MF | 1 | GO:0008879 | MF | 1 | GO:0047451 | MF | 1 |
| GO:0019825 | MF | 1 | GO:0016671 | MF | 1 | GO:0008897 | MF | 1 | GO:0030848 | MF | 1 |
| GO:0008745 | MF | 1 | GO:0042912 | MF | 1 | GO:0052739 | MF | 1 | GO:0052594 | MF | 1 |
| GO:0003697 | MF | 1 | GO:0015430 | MF | 1 | GO:0004108 | MF | 1 | GO:0046573 | MF | 1 |
| GO:0035539 | MF | 1 | GO:0008324 | MF | 1 | GO:0004639 | MF | 1 | GO:0008831 | MF | 1 |
| GO:0052590 | MF | 1 | GO:0005247 | MF | 1 | GO:0003904 | MF | 1 | GO:0050518 | MF | 1 |
| GO:0016872 | MF | 1 | GO:0050308 | MF | 1 | GO:0003886 | MF | 1 | GO:0004298 | MF | 1 |
| GO:0018583 | MF | 1 | GO:0008111 | MF | 1 | GO:0005451 | MF | 1 | GO:0002134 | MF | 1 |
| GO:0097163 | MF | 1 | GO:0031404 | MF | 1 | GO:0003989 | MF | 1 | GO:0019148 | MF | 1 |
| GO:0015385 | MF | 1 | GO:0004820 | MF | 1 | GO:0102388 | MF | 1 | GO:0004630 | MF | 1 |
| GO:0042970 | MF | 1 | GO:0008509 | MF | 1 | GO:0071916 | MF | 1 | GO:0055041 | MF | 1 |
| GO:0004853 | MF | 1 | GO:0016746 | MF | 1 | GO:0019239 | MF | 1 | GO:0047653 | MF | 1 |
| GO:0036307 | MF | 1 | GO:0008899 | MF | 1 | GO:0004832 | MF | 1 | GO:0103117 | MF | 1 |
| GO:0004068 | MF | 1 | GO:0080130 | MF | 1 | GO:0050440 | MF | 1 | GO:0003978 | MF | 1 |
| GO:0016980 | MF | 1 | GO:0052881 | MF | 1 | GO:0003909 | MF | 1 | GO:0008687 | MF | 1 |
| GO:0050355 | MF | 1 | GO:0004333 | MF | 1 | GO:0008863 | MF | 1 | GO:0102308 | MF | 1 |
| GO:0018548 | MF | 1 | GO:0050380 | MF | 1 | GO:0002020 | MF | 1 | GO:0043168 | MF | 1 |
| GO:0005198 | MF | 1 | GO:0018826 | MF | 1 | GO:0004020 | MF | 1 | GO:0004037 | MF | 1 |
| GO:0004129 | MF | 1 | GO:0004664 | MF | 1 | GO:0008289 | MF | 1 | GO:0004112 | MF | 1 |
| GO:0047949 | MF | 1 | GO:0009046 | MF | 1 | GO:0004143 | MF | 1 | GO:0018732 | MF | 1 |
| GO:0004367 | MF | 1 | GO:0030604 | MF | 1 | GO:0004781 | MF | 1 | GO:0003952 | MF | 1 |
| GO:0004529 | MF | 1 | GO:0016154 | MF | 1 | GO:0004783 | MF | 1 | GO:0008175 | MF | 1 |
| GO:0008782 | MF | 1 | GO:0004107 | MF | 1 | GO:1901359 | MF | 1 | GO:0016992 | MF | 1 |
| GO:0044715 | MF | 1 | GO:0004019 | MF | 1 | GO:0015044 | MF | 1 | GO:0070401 | MF | 1 |
| GO:0097216 | MF | 1 | GO:0004633 | MF | 1 | GO:0052656 | MF | 1 | GO:0030246 | MF | 1 |
| GO:0004106 | MF | 1 | GO:0050560 | MF | 1 | GO:0003996 | MF | 1 | GO:0004847 | MF | 1 |



|            |    |   |            |    |   |            |    |   |            |    |   |
|------------|----|---|------------|----|---|------------|----|---|------------|----|---|
| GO:0051266 | MF | 1 | GO:0003961 | MF | 1 | GO:0004594 | MF | 1 | GO:0016668 | MF | 1 |
| GO:0043815 | MF | 1 | GO:0102391 | MF | 1 | GO:0050347 | MF | 1 | GO:0032453 | MF | 1 |
| GO:0008379 | MF | 1 | GO:0036380 | MF | 1 | GO:0004516 | MF | 1 | GO:0004055 | MF | 1 |
| GO:0005280 | MF | 1 | GO:0060090 | MF | 1 | GO:0004638 | MF | 1 | GO:0004822 | MF | 1 |
| GO:0015294 | MF | 1 | GO:0015440 | MF | 1 | GO:0004315 | MF | 1 | GO:0008441 | MF | 1 |
| GO:0008239 | MF | 1 | GO:0043199 | MF | 1 | GO:0004398 | MF | 1 | GO:0061710 | MF | 1 |
| GO:0008753 | MF | 1 | GO:0019146 | MF | 1 | GO:0016884 | MF | 1 | GO:0003919 | MF | 1 |
| GO:0047533 | MF | 1 | GO:0005297 | MF | 1 | GO:0015180 | MF | 1 | GO:0016301 | MF | 1 |
| GO:0001681 | MF | 1 | GO:0004085 | MF | 1 | GO:0061503 | MF | 1 | GO:0016410 | MF | 1 |
| GO:0016671 | MF | 1 | GO:0016152 | MF | 1 | GO:0008534 | MF | 1 | GO:0008864 | MF | 1 |
| GO:0042912 | MF | 1 | GO:1903231 | MF | 1 | GO:0052690 | MF | 1 | GO:0018738 | MF | 1 |
| GO:0015430 | MF | 1 | GO:0050232 | MF | 1 | GO:0004337 | MF | 1 | GO:0008963 | MF | 1 |
| GO:0008324 | MF | 1 | GO:0043023 | MF | 1 | GO:0016717 | MF | 1 | GO:0070180 | MF | 1 |
| GO:0005247 | MF | 1 | GO:0000703 | MF | 1 | GO:0003937 | MF | 1 | GO:0034386 | MF | 1 |
| GO:0050308 | MF | 1 | GO:0003743 | MF | 1 | GO:0015226 | MF | 1 | GO:0004722 | MF | 1 |
| GO:0008111 | MF | 1 | GO:0034979 | MF | 1 | GO:0003882 | MF | 1 | GO:0015437 | MF | 1 |
| GO:0031404 | MF | 1 | GO:0102130 | MF | 1 | GO:0004563 | MF | 1 | GO:0016705 | MF | 1 |
| GO:0004820 | MF | 1 | GO:0008871 | MF | 1 | GO:0009022 | MF | 1 | GO:0004419 | MF | 1 |
| GO:0008509 | MF | 1 | GO:0004075 | MF | 1 | GO:0004080 | MF | 1 | GO:0008470 | MF | 1 |
| GO:0016746 | MF | 1 | GO:0008531 | MF | 1 | GO:0036218 | MF | 1 | GO:0004846 | MF | 1 |
| GO:0008899 | MF | 1 | GO:0005384 | MF | 1 | GO:0008915 | MF | 1 | GO:0004357 | MF | 1 |
| GO:0080130 | MF | 1 | GO:0030234 | MF | 1 | GO:0036222 | MF | 1 | GO:0051117 | MF | 1 |
| GO:0052881 | MF | 1 | GO:0004084 | MF | 1 | GO:0051907 | MF | 1 | GO:0008827 | MF | 1 |
| GO:0004333 | MF | 1 | GO:0051920 | MF | 1 | GO:0070043 | MF | 1 | GO:0016652 | MF | 1 |
| GO:0050380 | MF | 1 | GO:0070042 | MF | 1 | GO:0004332 | MF | 1 | GO:0016168 | MF | 1 |
| GO:0018826 | MF | 1 | GO:0016790 | MF | 1 | GO:0005249 | MF | 1 | GO:0003964 | MF | 1 |
| GO:0004664 | MF | 1 | GO:0004614 | MF | 1 | GO:0070041 | MF | 1 | GO:0046933 | MF | 1 |
| GO:0009046 | MF | 1 | GO:0016645 | MF | 1 | GO:0008198 | MF | 1 | GO:0008106 | MF | 1 |
| GO:0030604 | MF | 1 | GO:0047434 | MF | 1 | GO:0050662 | MF | 1 | GO:0015412 | MF | 1 |
| GO:0016154 | MF | 1 | GO:0004399 | MF | 1 | GO:0004526 | MF | 1 | GO:0034545 | MF | 1 |
| GO:0004107 | MF | 1 | GO:0008811 | MF | 1 | GO:0004795 | MF | 1 | GO:0008173 | MF | 1 |
| GO:0004019 | MF | 1 | GO:0003916 | MF | 1 | GO:0008695 | MF | 1 | GO:0008996 | MF | 1 |
| GO:0004633 | MF | 1 | GO:0005525 | MF | 1 | GO:0030283 | MF | 1 | GO:0032136 | MF | 1 |
| GO:0050560 | MF | 1 | GO:0052717 | MF | 1 | GO:0004746 | MF | 1 | GO:0004032 | MF | 1 |
| GO:0003961 | MF | 1 | GO:0008408 | MF | 1 | GO:0008839 | MF | 1 | GO:0102559 | MF | 1 |
| GO:0102391 | MF | 1 | GO:0004794 | MF | 1 | GO:0004148 | MF | 1 | GO:0004715 | MF | 1 |
| GO:0036380 | MF | 1 | GO:0033739 | MF | 1 | GO:0070040 | MF | 1 | GO:0035870 | MF | 1 |
| GO:0060090 | MF | 1 | GO:0015141 | MF | 1 | GO:0008972 | MF | 1 | GO:0005295 | MF | 1 |
| GO:0015440 | MF | 1 | GO:0102420 | MF | 1 | GO:0052823 | MF | 1 | GO:0103039 | MF | 1 |
| GO:0043199 | MF | 1 | GO:0003941 | MF | 1 | GO:0089715 | MF | 1 | GO:0005344 | MF | 1 |
| GO:0019146 | MF | 1 | GO:0004064 | MF | 1 | GO:0008889 | MF | 1 | GO:0033890 | MF | 1 |
| GO:0004085 | MF | 1 | GO:0034024 | MF | 1 | GO:0102998 | MF | 1 | GO:0008795 | MF | 1 |
| GO:0016152 | MF | 1 | GO:0016209 | MF | 1 | GO:0008452 | MF | 1 | GO:0015297 | MF | 1 |
| GO:1903231 | MF | 1 | GO:0047617 | MF | 1 | GO:0008668 | MF | 1 | GO:0008649 | MF | 1 |
| GO:0050232 | MF | 1 | GO:0052601 | MF | 1 | GO:0016772 | MF | 1 | GO:0035599 | MF | 1 |

|            |    |   |            |    |   |            |    |   |            |    |   |
|------------|----|---|------------|----|---|------------|----|---|------------|----|---|
| GO:0043023 | MF | 1 | GO:0009027 | MF | 1 | GO:0008641 | MF | 1 | GO:0008830 | MF | 1 |
| GO:0000703 | MF | 1 | GO:0050548 | MF | 1 | GO:0031072 | MF | 1 | GO:0008781 | MF | 1 |
| GO:0003743 | MF | 1 | GO:0016989 | MF | 1 | GO:0004477 | MF | 1 | GO:0008855 | MF | 1 |
| GO:0034979 | MF | 1 | GO:0097718 | MF | 1 | GO:0052927 | MF | 1 | GO:0033819 | MF | 1 |
| GO:0102130 | MF | 1 | GO:0047545 | MF | 1 | GO:0016166 | MF | 1 | GO:0004140 | MF | 1 |
| GO:0008871 | MF | 1 | GO:0008803 | MF | 1 | GO:0050547 | MF | 1 | GO:0008296 | MF | 1 |
| GO:0004075 | MF | 1 | GO:0004141 | MF | 1 | GO:0070677 | MF | 1 | GO:0016813 | MF | 1 |
| GO:0008531 | MF | 1 | GO:0008780 | MF | 1 | GO:0008825 | MF | 1 | GO:0052923 | MF | 1 |
| GO:0005384 | MF | 1 | GO:0102966 | MF | 1 | GO:0005385 | MF | 1 | GO:0016798 | MF | 1 |
| GO:0030234 | MF | 1 | GO:0003725 | MF | 1 | GO:0009882 | MF | 1 | GO:0008271 | MF | 1 |
| GO:0004084 | MF | 1 | GO:0015473 | MF | 1 | GO:0004553 | MF | 1 | GO:0016709 | MF | 1 |
| GO:0051920 | MF | 1 | GO:0015220 | MF | 1 | GO:0008984 | MF | 1 | GO:0004358 | MF | 1 |
| GO:0070042 | MF | 1 | GO:0051536 | MF | 1 | GO:0042925 | MF | 1 | GO:0001530 | MF | 1 |
| GO:0016790 | MF | 1 | GO:0015462 | MF | 1 | GO:0008097 | MF | 1 | GO:0047485 | MF | 1 |
| GO:0004614 | MF | 1 | GO:0089714 | MF | 1 | GO:0004490 | MF | 1 | GO:0009037 | MF | 1 |
| GO:0016645 | MF | 1 | GO:0102099 | MF | 1 | GO:0018480 | MF | 1 | GO:0015499 | MF | 1 |
| GO:0047434 | MF | 1 | GO:0008428 | MF | 1 | GO:0004658 | MF | 1 | GO:0004818 | MF | 1 |
| GO:0004399 | MF | 1 | GO:0010285 | MF | 1 | GO:0102955 | MF | 1 | GO:0004831 | MF | 1 |
| GO:0008811 | MF | 1 | GO:0008113 | MF | 1 | GO:0071111 | MF | 1 | GO:0044667 | MF | 1 |
| GO:0003916 | MF | 1 | GO:0008375 | MF | 1 | GO:0050484 | MF | 1 | GO:0047456 | MF | 1 |
| GO:0000287 | MF | 1 | GO:0047134 | MF | 1 | GO:0008477 | MF | 1 | GO:0016849 | MF | 1 |
| GO:0005525 | MF | 1 | GO:0004347 | MF | 1 | GO:0008253 | MF | 1 | GO:0004354 | MF | 1 |
| GO:0052717 | MF | 1 | GO:0003962 | MF | 1 | GO:0015188 | MF | 1 | GO:0008999 | MF | 1 |
| GO:0008408 | MF | 1 | GO:0047964 | MF | 1 | GO:1901515 | MF | 1 | GO:0018659 | MF | 1 |
| GO:0016597 | MF | 1 | GO:0036361 | MF | 1 | GO:0003856 | MF | 1 | GO:0071424 | MF | 1 |
| GO:0004794 | MF | 1 | GO:0048474 | MF | 1 | GO:0045302 | MF | 1 | GO:0102040 | MF | 1 |
| GO:0033739 | MF | 1 | GO:0036382 | MF | 1 | GO:0047265 | MF | 1 | GO:0018802 | MF | 1 |
| GO:0015141 | MF | 1 | GO:0004372 | MF | 1 | GO:0004739 | MF | 1 | GO:0008914 | MF | 1 |
| GO:0102420 | MF | 1 | GO:0008841 | MF | 1 | GO:0003860 | MF | 1 | GO:0016223 | MF | 1 |
| GO:0003941 | MF | 1 | GO:0017057 | MF | 1 | GO:0030729 | MF | 1 | GO:0004033 | MF | 1 |
| GO:0004064 | MF | 1 | GO:0004414 | MF | 1 | GO:0047646 | MF | 1 | GO:0004360 | MF | 1 |
| GO:0034024 | MF | 1 | GO:0016888 | MF | 1 | GO:0008677 | MF | 1 | GO:0033732 | MF | 1 |
| GO:0016209 | MF | 1 | GO:0016995 | MF | 1 | GO:0052654 | MF | 1 | GO:0000985 | MF | 1 |
| GO:0047617 | MF | 1 | GO:0050580 | MF | 1 | GO:0030973 | MF | 1 | GO:0051116 | MF | 1 |
| GO:0052601 | MF | 1 | GO:0043546 | MF | 1 | GO:0102264 | MF | 1 | GO:0000014 | MF | 1 |
| GO:0009027 | MF | 1 | GO:0004520 | MF | 1 | GO:0035596 | MF | 1 | GO:0003985 | MF | 1 |
| GO:0050548 | MF | 1 | GO:0051864 | MF | 1 | GO:0043725 | MF | 1 | GO:0004418 | MF | 1 |
| GO:0003676 | MF | 1 | GO:0015093 | MF | 1 | GO:0016631 | MF | 1 | GO:0047196 | MF | 1 |
| GO:0016989 | MF | 1 | GO:0008851 | MF | 1 | GO:0016614 | MF | 1 | GO:0016841 | MF | 1 |
| GO:0097718 | MF | 1 | GO:0080030 | MF | 1 | GO:0008762 | MF | 1 | GO:0070063 | MF | 1 |
| GO:0047545 | MF | 1 | GO:0004422 | MF | 1 | GO:0102523 | MF | 1 | GO:0004534 | MF | 1 |
| GO:0008803 | MF | 1 | GO:0008720 | MF | 1 | GO:0009378 | MF | 1 | GO:0004455 | MF | 1 |
| GO:0004141 | MF | 1 | GO:0005509 | MF | 1 | GO:0008685 | MF | 1 | GO:0004030 | MF | 1 |
| GO:0008780 | MF | 1 | GO:0070968 | MF | 1 | GO:0004417 | MF | 1 | GO:0019531 | MF | 1 |
| GO:0102966 | MF | 1 | GO:0015183 | MF | 1 | GO:0004623 | MF | 1 | GO:0008127 | MF | 1 |

|            |    |   |            |    |   |            |    |   |            |    |   |
|------------|----|---|------------|----|---|------------|----|---|------------|----|---|
| GO:0003725 | MF | 1 | GO:0018742 | MF | 1 | GO:0004309 | MF | 1 | GO:0004819 | MF | 1 |
| GO:0015473 | MF | 1 | GO:0033229 | MF | 1 | GO:0018774 | MF | 1 | GO:0004425 | MF | 1 |
| GO:0015220 | MF | 1 | GO:0004479 | MF | 1 | GO:0047780 | MF | 1 | GO:0004057 | MF | 1 |
| GO:0051536 | MF | 1 | GO:0008748 | MF | 1 | GO:0008976 | MF | 1 | GO:0004824 | MF | 1 |
| GO:0015462 | MF | 1 | GO:0008892 | MF | 1 | GO:0008456 | MF | 1 | GO:0050385 | MF | 1 |
| GO:0089714 | MF | 1 | GO:0004146 | MF | 1 | GO:0103068 | MF | 1 | GO:0008876 | MF | 1 |
| GO:0102099 | MF | 1 | GO:0015123 | MF | 1 | GO:0015655 | MF | 1 | GO:0008684 | MF | 1 |
| GO:0008428 | MF | 1 | GO:0004590 | MF | 1 | GO:0008718 | MF | 1 | GO:0008898 | MF | 1 |
| GO:0010285 | MF | 1 | GO:0047429 | MF | 1 | GO:0004640 | MF | 1 | GO:0103015 | MF | 1 |
| GO:0022857 | MF | 1 | GO:0043621 | MF | 1 | GO:0008703 | MF | 1 | GO:0004485 | MF | 1 |
| GO:0008113 | MF | 1 | GO:0015199 | MF | 1 | GO:0008666 | MF | 1 | GO:0004632 | MF | 1 |
| GO:0008375 | MF | 1 | GO:0008870 | MF | 1 | GO:0033897 | MF | 1 | GO:1904047 | MF | 1 |
| GO:0047134 | MF | 1 | GO:0018687 | MF | 1 | GO:0003922 | MF | 1 | GO:0102307 | MF | 1 |
| GO:0004347 | MF | 1 | GO:0030429 | MF | 1 | GO:0051500 | MF | 1 | GO:0000701 | MF | 1 |
| GO:0003962 | MF | 1 | GO:0047919 | MF | 1 | GO:0004733 | MF | 1 | GO:0042586 | MF | 1 |
| GO:0051082 | MF | 1 | GO:0102953 | MF | 1 | GO:0070038 | MF | 1 | GO:0009015 | MF | 1 |
| GO:0047964 | MF | 1 | GO:0046983 | MF | 1 | GO:0004176 | MF | 1 | GO:0033971 | MF | 1 |
| GO:0036361 | MF | 1 | GO:0004525 | MF | 1 | GO:0004180 | MF | 1 | GO:0005548 | MF | 1 |
| GO:0048474 | MF | 1 | GO:0004588 | MF | 1 | GO:0008662 | MF | 1 | GO:0019168 | MF | 1 |
| GO:0004372 | MF | 1 | GO:0004764 | MF | 1 | GO:0050194 | MF | 1 | GO:0003877 | MF | 1 |
| GO:0008841 | MF | 1 | GO:0047895 | MF | 1 | GO:0034909 | MF | 1 | GO:0050519 | MF | 1 |
| GO:0017057 | MF | 1 | GO:0016868 | MF | 1 | GO:0004644 | MF | 1 | GO:0043022 | MF | 1 |
| GO:0004414 | MF | 1 | GO:0047925 | MF | 1 | GO:0004826 | MF | 1 | GO:0051787 | MF | 1 |
| GO:0016888 | MF | 1 | GO:0050334 | MF | 1 | GO:0043799 | MF | 1 | GO:0003906 | MF | 1 |
| GO:0016995 | MF | 1 | GO:0070402 | MF | 1 | GO:0004735 | MF | 1 | GO:0045145 | MF | 1 |
| GO:0050580 | MF | 1 | GO:0016881 | MF | 1 | GO:0008728 | MF | 1 | GO:0004828 | MF | 1 |
| GO:0043546 | MF | 1 | GO:0018775 | MF | 1 | GO:0031419 | MF | 1 | GO:0003855 | MF | 1 |
| GO:0004520 | MF | 1 | GO:0003986 | MF | 1 | GO:0015175 | MF | 1 | GO:0008761 | MF | 1 |
| GO:0051864 | MF | 1 | GO:0050048 | MF | 1 | GO:0003884 | MF | 1 | GO:0035312 | MF | 1 |
| GO:0015093 | MF | 1 | GO:0004595 | MF | 1 | GO:0009032 | MF | 1 | GO:0015211 | MF | 1 |
| GO:0008851 | MF | 1 | GO:0015295 | MF | 1 | GO:0030366 | MF | 1 | GO:0004349 | MF | 1 |
| GO:0080030 | MF | 1 | GO:0043785 | MF | 1 | GO:0004617 | MF | 1 | GO:0047091 | MF | 1 |
| GO:0004422 | MF | 1 | GO:0015505 | MF | 1 | GO:0045340 | MF | 1 | GO:0030151 | MF | 1 |
| GO:0008720 | MF | 1 | GO:0036009 | MF | 1 | GO:0047445 | MF | 1 | GO:0051073 | MF | 1 |
| GO:0005509 | MF | 1 | GO:0004473 | MF | 1 | GO:0061603 | MF | 1 | GO:0004341 | MF | 1 |
| GO:0070968 | MF | 1 | GO:0004356 | MF | 1 | GO:0035595 | MF | 1 | GO:0102009 | MF | 1 |
| GO:0015183 | MF | 1 | GO:1990238 | MF | 1 | GO:0004799 | MF | 1 | GO:0008710 | MF | 1 |
| GO:0018742 | MF | 1 | GO:0004489 | MF | 1 | GO:0047475 | MF | 1 | GO:0003977 | MF | 1 |
| GO:0033229 | MF | 1 | GO:0003939 | MF | 1 | GO:0008908 | MF | 1 | GO:0004657 | MF | 1 |
| GO:0004479 | MF | 1 | GO:0008987 | MF | 1 | GO:0015181 | MF | 1 | GO:0009381 | MF | 1 |
| GO:0008748 | MF | 1 | GO:0003987 | MF | 1 | GO:0018633 | MF | 1 | GO:0004144 | MF | 1 |
| GO:0008892 | MF | 1 | GO:0140132 | MF | 1 | GO:0004601 | MF | 1 | GO:0008730 | MF | 1 |
| GO:0004146 | MF | 1 | GO:0047451 | MF | 1 | GO:0008872 | MF | 1 | GO:0043824 | MF | 1 |
| GO:0015123 | MF | 1 | GO:0030848 | MF | 1 | GO:0052587 | MF | 1 | GO:0005304 | MF | 1 |
| GO:0004590 | MF | 1 | GO:0052594 | MF | 1 | GO:0016818 | MF | 1 | GO:0003896 | MF | 1 |

|            |    |   |            |    |   |            |    |   |            |    |   |
|------------|----|---|------------|----|---|------------|----|---|------------|----|---|
| GO:0047429 | MF | 1 | GO:0046573 | MF | 1 | GO:0009013 | MF | 1 | GO:0004604 | MF | 1 |
| GO:0043621 | MF | 1 | GO:0008831 | MF | 1 | GO:0015106 | MF | 1 | GO:0043731 | MF | 1 |
| GO:0015199 | MF | 1 | GO:0050518 | MF | 1 | GO:0042945 | MF | 1 | GO:0046917 | MF | 1 |
| GO:0008870 | MF | 1 | GO:0004298 | MF | 1 | GO:0004643 | MF | 1 | GO:0004499 | MF | 1 |
| GO:0018687 | MF | 1 | GO:0002134 | MF | 1 | GO:0004114 | MF | 1 | GO:0004034 | MF | 1 |
| GO:0030429 | MF | 1 | GO:0019148 | MF | 1 | GO:0004174 | MF | 1 | GO:0018817 | MF | 1 |
| GO:0047919 | MF | 1 | GO:0004630 | MF | 1 | GO:0015136 | MF | 1 | GO:0008995 | MF | 1 |
| GO:0102953 | MF | 1 | GO:0055041 | MF | 1 | GO:0004456 | MF | 1 | GO:0004805 | MF | 1 |
| GO:0046983 | MF | 1 | GO:0047653 | MF | 1 | GO:0001072 | MF | 1 | GO:0043864 | MF | 1 |
| GO:0004525 | MF | 1 | GO:0103117 | MF | 1 | GO:0015077 | MF | 1 | GO:0008961 | MF | 1 |
| GO:0004588 | MF | 1 | GO:0003978 | MF | 1 | GO:0008970 | MF | 1 | GO:0009982 | MF | 1 |
| GO:0004764 | MF | 1 | GO:0008687 | MF | 1 | GO:0015171 | MF | 1 | GO:0047955 | MF | 1 |
| GO:0047895 | MF | 1 | GO:0102308 | MF | 1 | GO:0008965 | MF | 1 | GO:0033966 | MF | 1 |
| GO:0016868 | MF | 1 | GO:0046790 | MF | 1 | GO:0050501 | MF | 1 | GO:0000400 | MF | 1 |
| GO:0047925 | MF | 1 | GO:0043168 | MF | 1 | GO:0050093 | MF | 1 | GO:0008932 | MF | 1 |
| GO:0050334 | MF | 1 | GO:0004037 | MF | 1 | GO:0016810 | MF | 1 | GO:0018785 | MF | 1 |
| GO:0070402 | MF | 1 | GO:0004112 | MF | 1 | GO:0036054 | MF | 1 | GO:0004109 | MF | 1 |
| GO:0016881 | MF | 1 | GO:0018732 | MF | 1 | GO:0004591 | MF | 1 | GO:0018834 | MF | 1 |
| GO:0018775 | MF | 1 | GO:0003952 | MF | 1 | GO:0017089 | MF | 1 | GO:0061598 | MF | 1 |
| GO:0003986 | MF | 1 | GO:0008175 | MF | 1 | GO:0000062 | MF | 1 | GO:0047975 | MF | 1 |
| GO:0008930 | MF | 1 | GO:0016992 | MF | 1 | GO:0004807 | MF | 1 | GO:0005350 | MF | 1 |
| GO:0050048 | MF | 1 | GO:0003992 | MF | 1 | GO:0062101 | MF | 1 | GO:0008675 | MF | 1 |
| GO:0004595 | MF | 1 | GO:0070401 | MF | 1 | GO:0047425 | MF | 1 | GO:0003866 | MF | 1 |
| GO:0015295 | MF | 1 | GO:0000155 | MF | 1 | GO:0060698 | MF | 1 | GO:0050066 | MF | 1 |
| GO:0043785 | MF | 1 | GO:0030246 | MF | 1 | GO:0033727 | MF | 1 | GO:0061605 | MF | 1 |
| GO:0048039 | MF | 1 | GO:0004847 | MF | 1 | GO:0004754 | MF | 1 | GO:0033817 | MF | 1 |
| GO:0015505 | MF | 1 | GO:0016668 | MF | 1 | GO:0018627 | MF | 1 | GO:0008903 | MF | 1 |
| GO:0036009 | MF | 1 | GO:0032453 | MF | 1 | GO:0004049 | MF | 1 | GO:0016726 | MF | 1 |
| GO:0004473 | MF | 1 | GO:0004055 | MF | 1 | GO:0047527 | MF | 1 | GO:0036042 | MF | 1 |
| GO:0004356 | MF | 1 | GO:0004822 | MF | 1 | GO:0004150 | MF | 1 | GO:0102100 | MF | 1 |
| GO:1990238 | MF | 1 | GO:0008441 | MF | 1 | GO:0004834 | MF | 1 | GO:0015112 | MF | 1 |
| GO:0004489 | MF | 1 | GO:0061710 | MF | 1 | GO:0004515 | MF | 1 | GO:0047407 | MF | 1 |
| GO:0003939 | MF | 1 | GO:0003919 | MF | 1 | GO:0018626 | MF | 1 | GO:0004078 | MF | 1 |
| GO:0008987 | MF | 1 | GO:0000150 | MF | 1 | GO:0004121 | MF | 1 | GO:0015411 | MF | 1 |
| GO:0003987 | MF | 1 | GO:0016301 | MF | 1 | GO:0008818 | MF | 1 | GO:0036412 | MF | 1 |
| GO:0140132 | MF | 1 | GO:0016410 | MF | 1 | GO:0008935 | MF | 1 | GO:0051087 | MF | 1 |
| GO:0047451 | MF | 1 | GO:0008864 | MF | 1 | GO:0071972 | MF | 1 | GO:0033818 | MF | 1 |
| GO:0030848 | MF | 1 | GO:0018738 | MF | 1 | GO:0008893 | MF | 1 | GO:0044716 | MF | 1 |
| GO:0046573 | MF | 1 | GO:0008963 | MF | 1 | GO:0043866 | MF | 1 | GO:0140306 | MF | 1 |
| GO:0008831 | MF | 1 | GO:0070180 | MF | 1 | GO:0046429 | MF | 1 | GO:0008967 | MF | 1 |
| GO:0050518 | MF | 1 | GO:0034386 | MF | 1 | GO:0004324 | MF | 1 | GO:0004021 | MF | 1 |
| GO:0004298 | MF | 1 | GO:0004722 | MF | 1 | GO:0008692 | MF | 1 | GO:0004641 | MF | 1 |
| GO:0002134 | MF | 1 | GO:0015437 | MF | 1 | GO:0047922 | MF | 1 | GO:0052911 | MF | 1 |
| GO:0019148 | MF | 1 | GO:0016705 | MF | 1 | GO:1990610 | MF | 1 | GO:0004655 | MF | 1 |
| GO:0004630 | MF | 1 | GO:0004419 | MF | 1 | GO:0008835 | MF | 1 | GO:0004792 | MF | 1 |

|            |    |   |            |    |   |            |    |   |            |    |   |
|------------|----|---|------------|----|---|------------|----|---|------------|----|---|
| GO:0055041 | MF | 1 | GO:0008470 | MF | 1 | GO:0052873 | MF | 1 | GO:0016879 | MF | 1 |
| GO:0047653 | MF | 1 | GO:0004846 | MF | 1 | GO:0047154 | MF | 1 | GO:0042944 | MF | 1 |
| GO:0103117 | MF | 1 | GO:0004357 | MF | 1 | GO:0047689 | MF | 1 | GO:0050511 | MF | 1 |
| GO:0003978 | MF | 1 | GO:0051117 | MF | 1 | GO:0008320 | MF | 1 | GO:0004022 | MF | 1 |
| GO:0008687 | MF | 1 | GO:0008827 | MF | 1 | GO:0016763 | MF | 1 | GO:0008689 | MF | 1 |
| GO:0102308 | MF | 1 | GO:0016652 | MF | 1 | GO:0047569 | MF | 1 | GO:0008764 | MF | 1 |
| GO:0043168 | MF | 1 | GO:0016168 | MF | 1 | GO:0046961 | MF | 1 | GO:0030378 | MF | 1 |
| GO:0004037 | MF | 1 | GO:0003964 | MF | 1 | GO:0017150 | MF | 1 | GO:0008821 | MF | 1 |
| GO:0004112 | MF | 1 | GO:0046933 | MF | 1 | GO:0016150 | MF | 1 | GO:0008885 | MF | 1 |
| GO:0018732 | MF | 1 | GO:0008106 | MF | 1 | GO:0018842 | MF | 1 | GO:0052833 | MF | 1 |
| GO:0003952 | MF | 1 | GO:0015412 | MF | 1 | GO:0004636 | MF | 1 | GO:0008260 | MF | 1 |
| GO:0008175 | MF | 1 | GO:0034545 | MF | 1 | GO:0015159 | MF | 1 | GO:0004540 | MF | 1 |
| GO:0016992 | MF | 1 | GO:0008173 | MF | 1 | GO:0052666 | MF | 1 | GO:0003994 | MF | 1 |
| GO:0003992 | MF | 1 | GO:0008996 | MF | 1 | GO:0051903 | MF | 1 | GO:0032977 | MF | 1 |
| GO:0070401 | MF | 1 | GO:0032136 | MF | 1 | GO:0004514 | MF | 1 | GO:0004634 | MF | 1 |
| GO:0000155 | MF | 1 | GO:0004032 | MF | 1 | GO:0120159 | MF | 1 | GO:0008942 | MF | 1 |
| GO:0030246 | MF | 1 | GO:0102559 | MF | 1 | GO:0008484 | MF | 1 | GO:0034336 | MF | 1 |
| GO:0004847 | MF | 1 | GO:0042910 | MF | 1 | GO:0008836 | MF | 1 | GO:0004016 | MF | 1 |
| GO:0016668 | MF | 1 | GO:0004715 | MF | 1 | GO:0000774 | MF | 1 | GO:0004076 | MF | 1 |
| GO:0032453 | MF | 1 | GO:0035870 | MF | 1 | GO:0045551 | MF | 1 | GO:0008131 | MF | 1 |
| GO:0004055 | MF | 1 | GO:0005295 | MF | 1 | GO:0000175 | MF | 1 | GO:0140032 | MF | 1 |
| GO:0004822 | MF | 1 | GO:0103039 | MF | 1 | GO:0008691 | MF | 1 | GO:0050661 | MF | 1 |
| GO:0008441 | MF | 1 | GO:0004368 | MF | 1 | GO:0019862 | MF | 1 | GO:0015667 | MF | 1 |
| GO:0061710 | MF | 1 | GO:0005344 | MF | 1 | GO:0004748 | MF | 1 | GO:0044466 | MF | 1 |
| GO:0003919 | MF | 1 | GO:0033890 | MF | 1 | GO:0047448 | MF | 1 | GO:0050572 | MF | 1 |
| GO:0016301 | MF | 1 | GO:0008795 | MF | 1 | GO:0003951 | MF | 1 | GO:0004742 | MF | 1 |
| GO:0016410 | MF | 1 | GO:0015297 | MF | 1 | GO:0018492 | MF | 1 | GO:0016903 | MF | 1 |
| GO:0008864 | MF | 1 | GO:0008649 | MF | 1 | GO:0008659 | MF | 1 | GO:0004151 | MF | 1 |
| GO:0018738 | MF | 1 | GO:0035599 | MF | 1 | GO:0033735 | MF | 1 | GO:0052740 | MF | 1 |
| GO:0008963 | MF | 1 | GO:0008830 | MF | 1 | GO:0140078 | MF | 1 | GO:0043682 | MF | 1 |
| GO:0070180 | MF | 1 | GO:0008781 | MF | 1 | GO:0015379 | MF | 1 | GO:0015184 | MF | 1 |
| GO:0034386 | MF | 1 | GO:0008855 | MF | 1 | GO:0004301 | MF | 1 | GO:0008700 | MF | 1 |
| GO:0015437 | MF | 1 | GO:0033819 | MF | 1 | GO:0004072 | MF | 1 | GO:0003949 | MF | 1 |
| GO:0016705 | MF | 1 | GO:0004140 | MF | 1 | GO:0004714 | MF | 1 | GO:0034634 | MF | 1 |
| GO:0004419 | MF | 1 | GO:0008296 | MF | 1 | GO:0004397 | MF | 1 | GO:0016618 | MF | 1 |
| GO:0008470 | MF | 1 | GO:0016813 | MF | 1 | GO:0103046 | MF | 1 | GO:0004317 | MF | 1 |
| GO:0004846 | MF | 1 | GO:0052923 | MF | 1 | GO:0008886 | MF | 1 | GO:0005085 | MF | 1 |
| GO:0004357 | MF | 1 | GO:0016798 | MF | 1 | GO:0046316 | MF | 1 | GO:0046873 | MF | 1 |
| GO:0051117 | MF | 1 | GO:0008271 | MF | 1 | GO:0034257 | MF | 1 | GO:0102008 | MF | 1 |
| GO:0008827 | MF | 1 | GO:0016709 | MF | 1 | GO:0047631 | MF | 1 | GO:0004814 | MF | 1 |
| GO:0016652 | MF | 1 | GO:0004358 | MF | 1 | GO:0047293 | MF | 1 | GO:0008879 | MF | 1 |
| GO:0016168 | MF | 1 | GO:0001530 | MF | 1 | GO:0047693 | MF | 1 | GO:0008897 | MF | 1 |
| GO:0003964 | MF | 1 | GO:0047485 | MF | 1 | GO:0047936 | MF | 1 | GO:0052739 | MF | 1 |
| GO:0046933 | MF | 1 | GO:0009037 | MF | 1 | GO:0044668 | MF | 1 | GO:0004108 | MF | 1 |
| GO:0008106 | MF | 1 | GO:0015499 | MF | 1 | GO:0000009 | MF | 1 | GO:0004639 | MF | 1 |

|            |    |   |            |    |   |            |    |   |            |    |   |
|------------|----|---|------------|----|---|------------|----|---|------------|----|---|
| GO:0015412 | MF | 1 | GO:0004818 | MF | 1 | GO:0070403 | MF | 1 | GO:0003904 | MF | 1 |
| GO:0034545 | MF | 1 | GO:0004831 | MF | 1 | GO:0016773 | MF | 1 | GO:0003886 | MF | 1 |
| GO:0008173 | MF | 1 | GO:0044667 | MF | 1 | GO:0033734 | MF | 1 | GO:0005451 | MF | 1 |
| GO:0008996 | MF | 1 | GO:0047456 | MF | 1 | GO:0008874 | MF | 1 | GO:0003989 | MF | 1 |
| GO:0032136 | MF | 1 | GO:0016849 | MF | 1 | GO:0004048 | MF | 1 | GO:0102388 | MF | 1 |
| GO:0004032 | MF | 1 | GO:0008483 | MF | 1 | GO:0016788 | MF | 1 | GO:0071916 | MF | 1 |
| GO:0102559 | MF | 1 | GO:0004354 | MF | 1 | GO:0008936 | MF | 1 | GO:0019239 | MF | 1 |
| GO:0042910 | MF | 1 | GO:0008999 | MF | 1 | GO:0036055 | MF | 1 | GO:0052689 | MF | 1 |
| GO:0004715 | MF | 1 | GO:0018659 | MF | 1 | GO:0070733 | MF | 1 | GO:0004832 | MF | 1 |
| GO:0035870 | MF | 1 | GO:0071424 | MF | 1 | GO:0008797 | MF | 1 | GO:0050440 | MF | 1 |
| GO:0005295 | MF | 1 | GO:0102040 | MF | 1 | GO:0004471 | MF | 1 | GO:0003909 | MF | 1 |
| GO:0103039 | MF | 1 | GO:0018802 | MF | 1 | GO:0008234 | MF | 1 | GO:0008863 | MF | 1 |
| GO:0004368 | MF | 1 | GO:0008914 | MF | 1 | GO:0008657 | MF | 1 | GO:0002020 | MF | 1 |
| GO:0005344 | MF | 1 | GO:0016223 | MF | 1 |            |    |   | GO:0004020 | MF | 1 |
| GO:0033890 | MF | 1 | GO:0004033 | MF | 1 |            |    |   | GO:0008289 | MF | 1 |
| GO:0008795 | MF | 1 | GO:0004360 | MF | 1 |            |    |   | GO:0004143 | MF | 1 |
| GO:0015297 | MF | 1 | GO:0033732 | MF | 1 |            |    |   | GO:0004781 | MF | 1 |
| GO:0008649 | MF | 1 | GO:0000985 | MF | 1 |            |    |   | GO:0004783 | MF | 1 |
| GO:0035599 | MF | 1 | GO:0051116 | MF | 1 |            |    |   | GO:1901359 | MF | 1 |
| GO:0008830 | MF | 1 | GO:0000014 | MF | 1 |            |    |   | GO:0015044 | MF | 1 |
| GO:0008781 | MF | 1 | GO:0003985 | MF | 1 |            |    |   | GO:0052656 | MF | 1 |
| GO:0008855 | MF | 1 | GO:0004418 | MF | 1 |            |    |   | GO:0003996 | MF | 1 |
| GO:0033819 | MF | 1 | GO:0047196 | MF | 1 |            |    |   | GO:0004594 | MF | 1 |
| GO:0004140 | MF | 1 | GO:0016841 | MF | 1 |            |    |   | GO:0050347 | MF | 1 |
| GO:0008296 | MF | 1 | GO:0070063 | MF | 1 |            |    |   | GO:0004516 | MF | 1 |
| GO:0016813 | MF | 1 | GO:0004534 | MF | 1 |            |    |   | GO:0004638 | MF | 1 |
| GO:0052923 | MF | 1 | GO:0004455 | MF | 1 |            |    |   | GO:0004315 | MF | 1 |
| GO:0016798 | MF | 1 | GO:0004030 | MF | 1 |            |    |   | GO:0004398 | MF | 1 |
| GO:0008271 | MF | 1 | GO:0019531 | MF | 1 |            |    |   | GO:0016884 | MF | 1 |
| GO:0016709 | MF | 1 | GO:0008127 | MF | 1 |            |    |   | GO:0015180 | MF | 1 |
| GO:0004358 | MF | 1 | GO:0004819 | MF | 1 |            |    |   | GO:0061503 | MF | 1 |
| GO:0001530 | MF | 1 | GO:0004425 | MF | 1 |            |    |   | GO:0008534 | MF | 1 |
| GO:0047485 | MF | 1 | GO:0004057 | MF | 1 |            |    |   | GO:0052690 | MF | 1 |
| GO:0009037 | MF | 1 | GO:0004824 | MF | 1 |            |    |   | GO:0004337 | MF | 1 |
| GO:0015499 | MF | 1 | GO:0050385 | MF | 1 |            |    |   | GO:0016717 | MF | 1 |
| GO:0004818 | MF | 1 | GO:0008876 | MF | 1 |            |    |   | GO:0003937 | MF | 1 |
| GO:0004831 | MF | 1 | GO:0008684 | MF | 1 |            |    |   | GO:0016151 | MF | 1 |
| GO:0044667 | MF | 1 | GO:0016829 | MF | 1 |            |    |   | GO:0015226 | MF | 1 |
| GO:0047456 | MF | 1 | GO:0008898 | MF | 1 |            |    |   | GO:0043798 | MF | 1 |
| GO:0016849 | MF | 1 | GO:0103015 | MF | 1 |            |    |   | GO:0003882 | MF | 1 |
| GO:0008483 | MF | 1 | GO:0004485 | MF | 1 |            |    |   | GO:0004563 | MF | 1 |
| GO:0004354 | MF | 1 | GO:0004632 | MF | 1 |            |    |   | GO:0009022 | MF | 1 |
| GO:0008999 | MF | 1 | GO:1904047 | MF | 1 |            |    |   | GO:0004080 | MF | 1 |
| GO:0018659 | MF | 1 | GO:0102307 | MF | 1 |            |    |   | GO:0036218 | MF | 1 |
| GO:0071424 | MF | 1 | GO:0000701 | MF | 1 |            |    |   | GO:0008915 | MF | 1 |

|            |    |   |            |    |   |            |    |   |
|------------|----|---|------------|----|---|------------|----|---|
| GO:0102040 | MF | 1 | GO:0042586 | MF | 1 | GO:0036222 | MF | 1 |
| GO:0018802 | MF | 1 | GO:0009015 | MF | 1 | GO:0051907 | MF | 1 |
| GO:0008914 | MF | 1 | GO:0033971 | MF | 1 | GO:0070043 | MF | 1 |
| GO:0016223 | MF | 1 | GO:0005548 | MF | 1 | GO:0004332 | MF | 1 |
| GO:0004033 | MF | 1 | GO:0019168 | MF | 1 | GO:0005249 | MF | 1 |
| GO:0004360 | MF | 1 | GO:0003877 | MF | 1 | GO:0070041 | MF | 1 |
| GO:0033732 | MF | 1 | GO:0050519 | MF | 1 | GO:0070039 | MF | 1 |
| GO:0000985 | MF | 1 | GO:0043022 | MF | 1 | GO:0008198 | MF | 1 |
| GO:0051116 | MF | 1 | GO:0051787 | MF | 1 | GO:0050662 | MF | 1 |
| GO:0000014 | MF | 1 | GO:0003906 | MF | 1 | GO:0004526 | MF | 1 |
| GO:0003985 | MF | 1 | GO:0045145 | MF | 1 | GO:0004795 | MF | 1 |
| GO:0004418 | MF | 1 | GO:0004828 | MF | 1 | GO:0008695 | MF | 1 |
| GO:0047196 | MF | 1 | GO:0003855 | MF | 1 | GO:0030283 | MF | 1 |
| GO:0016841 | MF | 1 | GO:0008761 | MF | 1 | GO:0004746 | MF | 1 |
| GO:0070063 | MF | 1 | GO:0004300 | MF | 1 | GO:0008839 | MF | 1 |
| GO:0004534 | MF | 1 | GO:0035312 | MF | 1 | GO:0004148 | MF | 1 |
| GO:0004455 | MF | 1 | GO:0015211 | MF | 1 | GO:0070040 | MF | 1 |
| GO:0004030 | MF | 1 | GO:0004349 | MF | 1 | GO:0008972 | MF | 1 |
| GO:0019531 | MF | 1 | GO:0047091 | MF | 1 | GO:0052823 | MF | 1 |
| GO:0008127 | MF | 1 | GO:0030151 | MF | 1 | GO:0089715 | MF | 1 |
| GO:0004819 | MF | 1 | GO:0051073 | MF | 1 | GO:0008889 | MF | 1 |
| GO:0004425 | MF | 1 | GO:0004341 | MF | 1 | GO:0102998 | MF | 1 |
| GO:0004057 | MF | 1 | GO:0102009 | MF | 1 | GO:0008452 | MF | 1 |
| GO:0004824 | MF | 1 | GO:0008710 | MF | 1 | GO:0008668 | MF | 1 |
| GO:0050385 | MF | 1 | GO:0003977 | MF | 1 | GO:0016772 | MF | 1 |
| GO:0008876 | MF | 1 | GO:0004657 | MF | 1 | GO:0008641 | MF | 1 |
| GO:0008684 | MF | 1 | GO:0009381 | MF | 1 | GO:0031072 | MF | 1 |
| GO:0016829 | MF | 1 | GO:0004144 | MF | 1 | GO:0004477 | MF | 1 |
| GO:0008898 | MF | 1 | GO:0008730 | MF | 1 | GO:0052927 | MF | 1 |
| GO:0103015 | MF | 1 | GO:0043824 | MF | 1 | GO:0015420 | MF | 1 |
| GO:0004485 | MF | 1 | GO:0005304 | MF | 1 | GO:0016166 | MF | 1 |
| GO:0004632 | MF | 1 | GO:0003896 | MF | 1 | GO:0050547 | MF | 1 |
| GO:1904047 | MF | 1 | GO:0004604 | MF | 1 | GO:0070677 | MF | 1 |
| GO:0102307 | MF | 1 | GO:0043731 | MF | 1 | GO:0004363 | MF | 1 |
| GO:0000701 | MF | 1 | GO:0046917 | MF | 1 | GO:0008825 | MF | 1 |
| GO:0042586 | MF | 1 | GO:0004499 | MF | 1 | GO:0005385 | MF | 1 |
| GO:0009015 | MF | 1 | GO:0004034 | MF | 1 | GO:0009882 | MF | 1 |
| GO:0033971 | MF | 1 | GO:0018817 | MF | 1 | GO:0004553 | MF | 1 |
| GO:0005548 | MF | 1 | GO:0008995 | MF | 1 | GO:0016628 | MF | 1 |
| GO:0019168 | MF | 1 | GO:0004805 | MF | 1 | GO:0008984 | MF | 1 |
| GO:0003877 | MF | 1 | GO:0043864 | MF | 1 | GO:0042925 | MF | 1 |
| GO:0050519 | MF | 1 | GO:0008961 | MF | 1 | GO:0008097 | MF | 1 |
| GO:0043022 | MF | 1 | GO:0009982 | MF | 1 | GO:0004490 | MF | 1 |
| GO:0051787 | MF | 1 | GO:0047955 | MF | 1 | GO:0018480 | MF | 1 |
| GO:0003906 | MF | 1 | GO:0033966 | MF | 1 | GO:0004658 | MF | 1 |

|            |    |   |            |    |   |            |    |   |
|------------|----|---|------------|----|---|------------|----|---|
| GO:0045145 | MF | 1 | GO:0000400 | MF | 1 | GO:0102955 | MF | 1 |
| GO:0004828 | MF | 1 | GO:0008932 | MF | 1 | GO:0071111 | MF | 1 |
| GO:0003855 | MF | 1 | GO:0018785 | MF | 1 | GO:0050484 | MF | 1 |
| GO:0008761 | MF | 1 | GO:0004109 | MF | 1 | GO:0008477 | MF | 1 |
| GO:0004300 | MF | 1 | GO:0018834 | MF | 1 | GO:0015662 | MF | 1 |
| GO:0035312 | MF | 1 | GO:0061598 | MF | 1 | GO:0008253 | MF | 1 |
| GO:0015211 | MF | 1 | GO:0047975 | MF | 1 | GO:0015188 | MF | 1 |
| GO:0004349 | MF | 1 | GO:0005350 | MF | 1 | GO:1901515 | MF | 1 |
| GO:0004015 | MF | 1 | GO:0008675 | MF | 1 | GO:0003856 | MF | 1 |
| GO:0047091 | MF | 1 | GO:0003866 | MF | 1 | GO:0045302 | MF | 1 |
| GO:0030151 | MF | 1 | GO:0050066 | MF | 1 | GO:0047265 | MF | 1 |
| GO:0051073 | MF | 1 | GO:0061605 | MF | 1 | GO:0004739 | MF | 1 |
| GO:0004341 | MF | 1 | GO:0033817 | MF | 1 | GO:0003860 | MF | 1 |
| GO:0102009 | MF | 1 | GO:0008903 | MF | 1 | GO:0030729 | MF | 1 |
| GO:0008710 | MF | 1 | GO:0016726 | MF | 1 | GO:0047646 | MF | 1 |
| GO:0003977 | MF | 1 | GO:0036042 | MF | 1 | GO:0008677 | MF | 1 |
| GO:0004657 | MF | 1 | GO:0102100 | MF | 1 | GO:0033608 | MF | 1 |
| GO:0009381 | MF | 1 | GO:0015112 | MF | 1 | GO:0052654 | MF | 1 |
| GO:0004144 | MF | 1 | GO:0047407 | MF | 1 | GO:0030973 | MF | 1 |
| GO:0008730 | MF | 1 | GO:0004078 | MF | 1 | GO:0102264 | MF | 1 |
| GO:0043824 | MF | 1 | GO:0003918 | MF | 1 | GO:0035596 | MF | 1 |
| GO:0005304 | MF | 1 | GO:0015411 | MF | 1 | GO:0003979 | MF | 1 |
| GO:0003896 | MF | 1 | GO:1904680 | MF | 1 | GO:0043725 | MF | 1 |
| GO:0004604 | MF | 1 | GO:0036412 | MF | 1 | GO:0016631 | MF | 1 |
| GO:0043731 | MF | 1 | GO:0004549 | MF | 1 | GO:0016614 | MF | 1 |
| GO:0046917 | MF | 1 | GO:0051087 | MF | 1 | GO:0008762 | MF | 1 |
| GO:0004499 | MF | 1 | GO:0033818 | MF | 1 | GO:0102523 | MF | 1 |
| GO:0004034 | MF | 1 | GO:0044716 | MF | 1 | GO:0009378 | MF | 1 |
| GO:0018817 | MF | 1 | GO:0140306 | MF | 1 | GO:0008685 | MF | 1 |
| GO:0008995 | MF | 1 | GO:0008967 | MF | 1 | GO:0004417 | MF | 1 |
| GO:0004805 | MF | 1 | GO:0004021 | MF | 1 | GO:0004623 | MF | 1 |
| GO:0043864 | MF | 1 | GO:0004641 | MF | 1 | GO:0004309 | MF | 1 |
| GO:0008961 | MF | 1 | GO:0052911 | MF | 1 | GO:0018774 | MF | 1 |
| GO:0009982 | MF | 1 | GO:0004655 | MF | 1 | GO:0047780 | MF | 1 |
| GO:0047955 | MF | 1 | GO:0004792 | MF | 1 | GO:0008976 | MF | 1 |
| GO:0033966 | MF | 1 | GO:0016879 | MF | 1 | GO:0008456 | MF | 1 |
| GO:0000400 | MF | 1 | GO:0042944 | MF | 1 | GO:0003746 | MF | 1 |
| GO:0008932 | MF | 1 | GO:0050511 | MF | 1 | GO:0103068 | MF | 1 |
| GO:0018785 | MF | 1 | GO:0004022 | MF | 1 | GO:0015655 | MF | 1 |
| GO:0004109 | MF | 1 | GO:0052890 | MF | 1 | GO:0008718 | MF | 1 |
| GO:0018834 | MF | 1 | GO:0008689 | MF | 1 | GO:0004640 | MF | 1 |
| GO:0061598 | MF | 1 | GO:0008764 | MF | 1 | GO:0008703 | MF | 1 |
| GO:0047975 | MF | 1 | GO:0008854 | MF | 1 | GO:0008666 | MF | 1 |
| GO:0005350 | MF | 1 | GO:0030378 | MF | 1 | GO:0033897 | MF | 1 |
| GO:0008675 | MF | 1 | GO:0008821 | MF | 1 | GO:0003922 | MF | 1 |



|            |    |   |            |    |   |            |    |   |
|------------|----|---|------------|----|---|------------|----|---|
| GO:0003866 | MF | 1 | GO:0008885 | MF | 1 | GO:0051500 | MF | 1 |
| GO:0050066 | MF | 1 | GO:0052833 | MF | 1 | GO:0004733 | MF | 1 |
| GO:0061605 | MF | 1 | GO:0008260 | MF | 1 | GO:0043115 | MF | 1 |
| GO:0033817 | MF | 1 | GO:0004540 | MF | 1 | GO:0070038 | MF | 1 |
| GO:0008903 | MF | 1 | GO:0003994 | MF | 1 | GO:0004176 | MF | 1 |
| GO:0016726 | MF | 1 | GO:0032977 | MF | 1 | GO:0004180 | MF | 1 |
| GO:0036042 | MF | 1 | GO:0004634 | MF | 1 | GO:0008662 | MF | 1 |
| GO:0102100 | MF | 1 | GO:0008942 | MF | 1 | GO:0050194 | MF | 1 |
| GO:0015112 | MF | 1 | GO:0034336 | MF | 1 | GO:0034909 | MF | 1 |
| GO:0047407 | MF | 1 | GO:0004016 | MF | 1 | GO:0004644 | MF | 1 |
| GO:0004078 | MF | 1 | GO:0004076 | MF | 1 | GO:0004826 | MF | 1 |
| GO:0003918 | MF | 1 | GO:0000049 | MF | 1 | GO:0043799 | MF | 1 |
| GO:0015411 | MF | 1 | GO:0008131 | MF | 1 | GO:0004735 | MF | 1 |
| GO:1904680 | MF | 1 | GO:0140032 | MF | 1 | GO:0008728 | MF | 1 |
| GO:0036412 | MF | 1 | GO:0015667 | MF | 1 | GO:0031419 | MF | 1 |
| GO:0004549 | MF | 1 | GO:0044466 | MF | 1 | GO:0015175 | MF | 1 |
| GO:0051087 | MF | 1 | GO:0008800 | MF | 1 | GO:0003884 | MF | 1 |
| GO:0033818 | MF | 1 | GO:0050572 | MF | 1 | GO:0009032 | MF | 1 |
| GO:0008650 | MF | 1 | GO:0004742 | MF | 1 | GO:0030366 | MF | 1 |
| GO:0044716 | MF | 1 | GO:0016903 | MF | 1 | GO:0004617 | MF | 1 |
| GO:0140306 | MF | 1 | GO:0004151 | MF | 1 | GO:0045340 | MF | 1 |
| GO:0008967 | MF | 1 | GO:0052740 | MF | 1 | GO:0047445 | MF | 1 |
| GO:0004021 | MF | 1 | GO:0043682 | MF | 1 | GO:0061603 | MF | 1 |
| GO:0004641 | MF | 1 | GO:0015184 | MF | 1 | GO:0035595 | MF | 1 |
| GO:0052911 | MF | 1 | GO:0008700 | MF | 1 | GO:0004799 | MF | 1 |
| GO:0004655 | MF | 1 | GO:0003949 | MF | 1 | GO:0047475 | MF | 1 |
| GO:0004792 | MF | 1 | GO:0034634 | MF | 1 | GO:0008908 | MF | 1 |
| GO:0016879 | MF | 1 | GO:0016618 | MF | 1 | GO:0015181 | MF | 1 |
| GO:0042944 | MF | 1 | GO:0004317 | MF | 1 | GO:0015444 | MF | 1 |
| GO:0050511 | MF | 1 | GO:0005085 | MF | 1 | GO:0018633 | MF | 1 |
| GO:0004022 | MF | 1 | GO:0046873 | MF | 1 | GO:0004601 | MF | 1 |
| GO:0052890 | MF | 1 | GO:0102008 | MF | 1 | GO:0008872 | MF | 1 |
| GO:0008689 | MF | 1 | GO:0052856 | MF | 1 | GO:0052587 | MF | 1 |
| GO:0008764 | MF | 1 | GO:0004814 | MF | 1 | GO:0016818 | MF | 1 |
| GO:0008854 | MF | 1 | GO:0008879 | MF | 1 | GO:0009013 | MF | 1 |
| GO:0030378 | MF | 1 | GO:0008897 | MF | 1 | GO:0015106 | MF | 1 |
| GO:0008821 | MF | 1 | GO:0052739 | MF | 1 | GO:0042945 | MF | 1 |
| GO:0008885 | MF | 1 | GO:0004108 | MF | 1 | GO:0004643 | MF | 1 |
| GO:0052833 | MF | 1 | GO:0004639 | MF | 1 | GO:0004114 | MF | 1 |
| GO:0008260 | MF | 1 | GO:0003904 | MF | 1 | GO:0004174 | MF | 1 |
| GO:0004540 | MF | 1 | GO:0003886 | MF | 1 | GO:0015136 | MF | 1 |
| GO:0003994 | MF | 1 | GO:0005451 | MF | 1 | GO:0004456 | MF | 1 |
| GO:0032977 | MF | 1 | GO:0003989 | MF | 1 | GO:0001072 | MF | 1 |
| GO:0004634 | MF | 1 | GO:0102388 | MF | 1 | GO:0015077 | MF | 1 |
| GO:0008942 | MF | 1 | GO:0071916 | MF | 1 | GO:0015137 | MF | 1 |

|            |    |   |            |    |   |            |    |   |
|------------|----|---|------------|----|---|------------|----|---|
| GO:0034336 | MF | 1 | GO:0019239 | MF | 1 | GO:0008970 | MF | 1 |
| GO:0004016 | MF | 1 | GO:0052689 | MF | 1 | GO:0015171 | MF | 1 |
| GO:0004076 | MF | 1 | GO:0004832 | MF | 1 | GO:0008965 | MF | 1 |
| GO:0000049 | MF | 1 | GO:0050440 | MF | 1 | GO:0050501 | MF | 1 |
| GO:0140032 | MF | 1 | GO:0003909 | MF | 1 | GO:0050093 | MF | 1 |
| GO:0015667 | MF | 1 | GO:0008863 | MF | 1 | GO:0016810 | MF | 1 |
| GO:0044466 | MF | 1 | GO:0002020 | MF | 1 | GO:0036054 | MF | 1 |
| GO:0008800 | MF | 1 | GO:0008115 | MF | 1 | GO:0004591 | MF | 1 |
| GO:0050572 | MF | 1 | GO:0003924 | MF | 1 | GO:0046565 | MF | 1 |
| GO:0004742 | MF | 1 | GO:0004020 | MF | 1 | GO:0017089 | MF | 1 |
| GO:0016903 | MF | 1 | GO:0008289 | MF | 1 | GO:0000062 | MF | 1 |
| GO:0004151 | MF | 1 | GO:0004143 | MF | 1 | GO:0050357 | MF | 1 |
| GO:0052740 | MF | 1 | GO:0004781 | MF | 1 | GO:0004807 | MF | 1 |
| GO:0043682 | MF | 1 | GO:0004783 | MF | 1 | GO:0062101 | MF | 1 |
| GO:0015184 | MF | 1 | GO:1901359 | MF | 1 | GO:0047425 | MF | 1 |
| GO:0008700 | MF | 1 | GO:0015044 | MF | 1 | GO:0060698 | MF | 1 |
| GO:0003949 | MF | 1 | GO:0052656 | MF | 1 | GO:0033727 | MF | 1 |
| GO:0034634 | MF | 1 | GO:0003996 | MF | 1 | GO:0016840 | MF | 1 |
| GO:0016618 | MF | 1 | GO:0004594 | MF | 1 | GO:0004754 | MF | 1 |
| GO:0004317 | MF | 1 | GO:0050347 | MF | 1 | GO:0009883 | MF | 1 |
| GO:0005085 | MF | 1 | GO:0004516 | MF | 1 | GO:0018627 | MF | 1 |
| GO:0046873 | MF | 1 | GO:0004638 | MF | 1 | GO:0016853 | MF | 1 |
| GO:0102008 | MF | 1 | GO:0004315 | MF | 1 | GO:0004806 | MF | 1 |
| GO:0052856 | MF | 1 | GO:0004398 | MF | 1 | GO:0004049 | MF | 1 |
| GO:0004814 | MF | 1 | GO:0004156 | MF | 1 | GO:0047527 | MF | 1 |
| GO:0008879 | MF | 1 | GO:0016884 | MF | 1 | GO:0004150 | MF | 1 |
| GO:0008897 | MF | 1 | GO:0004069 | MF | 1 | GO:0004834 | MF | 1 |
| GO:0052739 | MF | 1 | GO:0015180 | MF | 1 | GO:0004515 | MF | 1 |
| GO:0004108 | MF | 1 | GO:0061503 | MF | 1 | GO:0004851 | MF | 1 |
| GO:0004639 | MF | 1 | GO:0008534 | MF | 1 | GO:0004175 | MF | 1 |
| GO:0003904 | MF | 1 | GO:0052690 | MF | 1 | GO:0004121 | MF | 1 |
| GO:0003886 | MF | 1 | GO:0004337 | MF | 1 | GO:0008818 | MF | 1 |
| GO:0005451 | MF | 1 | GO:0016717 | MF | 1 | GO:0008935 | MF | 1 |
| GO:0003989 | MF | 1 | GO:0003937 | MF | 1 | GO:0071972 | MF | 1 |
| GO:0102388 | MF | 1 | GO:0015226 | MF | 1 | GO:0008893 | MF | 1 |
| GO:0071916 | MF | 1 | GO:0043798 | MF | 1 | GO:0043866 | MF | 1 |
| GO:0019239 | MF | 1 | GO:0003882 | MF | 1 | GO:0046429 | MF | 1 |
| GO:0052689 | MF | 1 | GO:0004563 | MF | 1 | GO:0004324 | MF | 1 |
| GO:0001000 | MF | 1 | GO:0009022 | MF | 1 | GO:0008692 | MF | 1 |
| GO:0004832 | MF | 1 | GO:0004080 | MF | 1 | GO:0034040 | MF | 1 |
| GO:0050440 | MF | 1 | GO:0036218 | MF | 1 | GO:0047922 | MF | 1 |
| GO:0003909 | MF | 1 | GO:0008915 | MF | 1 | GO:1990610 | MF | 1 |
| GO:0008863 | MF | 1 | GO:0036222 | MF | 1 | GO:0008835 | MF | 1 |
| GO:0002020 | MF | 1 | GO:0051907 | MF | 1 | GO:0052873 | MF | 1 |
| GO:0008115 | MF | 1 | GO:0070043 | MF | 1 | GO:0047154 | MF | 1 |

|            |    |   |            |    |   |            |    |   |
|------------|----|---|------------|----|---|------------|----|---|
| GO:0003924 | MF | 1 | GO:0004332 | MF | 1 | GO:0047689 | MF | 1 |
| GO:0004020 | MF | 1 | GO:0005249 | MF | 1 | GO:0008320 | MF | 1 |
| GO:0008289 | MF | 1 | GO:0070041 | MF | 1 | GO:0016763 | MF | 1 |
| GO:0004143 | MF | 1 | GO:0070039 | MF | 1 | GO:0047569 | MF | 1 |
| GO:0004781 | MF | 1 | GO:0008198 | MF | 1 | GO:0046961 | MF | 1 |
| GO:0004783 | MF | 1 | GO:0050662 | MF | 1 | GO:0017150 | MF | 1 |
| GO:1901359 | MF | 1 | GO:0018685 | MF | 1 | GO:0016150 | MF | 1 |
| GO:0015044 | MF | 1 | GO:0004526 | MF | 1 | GO:0018842 | MF | 1 |
| GO:0052656 | MF | 1 | GO:0004795 | MF | 1 | GO:0004636 | MF | 1 |
| GO:0003996 | MF | 1 | GO:0008695 | MF | 1 | GO:0015159 | MF | 1 |
| GO:0004594 | MF | 1 | GO:0052857 | MF | 1 | GO:0052666 | MF | 1 |
| GO:0050347 | MF | 1 | GO:0030283 | MF | 1 | GO:0051903 | MF | 1 |
| GO:0004516 | MF | 1 | GO:0004746 | MF | 1 | GO:0004514 | MF | 1 |
| GO:0004638 | MF | 1 | GO:0008839 | MF | 1 | GO:0120159 | MF | 1 |
| GO:0004315 | MF | 1 | GO:0004148 | MF | 1 | GO:0008836 | MF | 1 |
| GO:0004398 | MF | 1 | GO:0070040 | MF | 1 | GO:0008840 | MF | 1 |
| GO:0004156 | MF | 1 | GO:0008972 | MF | 1 | GO:0000774 | MF | 1 |
| GO:0016884 | MF | 1 | GO:0052823 | MF | 1 | GO:0045551 | MF | 1 |
| GO:0004069 | MF | 1 | GO:0089715 | MF | 1 | GO:0000175 | MF | 1 |
| GO:0015180 | MF | 1 | GO:0008889 | MF | 1 | GO:0008691 | MF | 1 |
| GO:0061503 | MF | 1 | GO:0102998 | MF | 1 | GO:0019862 | MF | 1 |
| GO:0008534 | MF | 1 | GO:0008452 | MF | 1 | GO:0003848 | MF | 1 |
| GO:0052690 | MF | 1 | GO:0008668 | MF | 1 | GO:0005216 | MF | 1 |
| GO:0004337 | MF | 1 | GO:0016772 | MF | 1 | GO:0004748 | MF | 1 |
| GO:0016717 | MF | 1 | GO:0008641 | MF | 1 | GO:0047448 | MF | 1 |
| GO:0003937 | MF | 1 | GO:0031072 | MF | 1 | GO:0003951 | MF | 1 |
| GO:0016151 | MF | 1 | GO:0004477 | MF | 1 | GO:0018492 | MF | 1 |
| GO:0015226 | MF | 1 | GO:0052927 | MF | 1 | GO:0008659 | MF | 1 |
| GO:0043798 | MF | 1 | GO:0015420 | MF | 1 | GO:0033735 | MF | 1 |
| GO:0003882 | MF | 1 | GO:0003988 | MF | 1 | GO:0140078 | MF | 1 |
| GO:0004563 | MF | 1 | GO:0016166 | MF | 1 | GO:0015379 | MF | 1 |
| GO:0009022 | MF | 1 | GO:0050547 | MF | 1 | GO:0004301 | MF | 1 |
| GO:0004080 | MF | 1 | GO:0070677 | MF | 1 | GO:0004072 | MF | 1 |
| GO:0036218 | MF | 1 | GO:0008825 | MF | 1 | GO:0004714 | MF | 1 |
| GO:0008915 | MF | 1 | GO:0005385 | MF | 1 | GO:0004397 | MF | 1 |
| GO:0036222 | MF | 1 | GO:0009882 | MF | 1 | GO:0103046 | MF | 1 |
| GO:0051907 | MF | 1 | GO:0004553 | MF | 1 | GO:0008886 | MF | 1 |
| GO:0070043 | MF | 1 | GO:0016628 | MF | 1 | GO:0046316 | MF | 1 |
| GO:0004332 | MF | 1 | GO:0008984 | MF | 1 | GO:0034257 | MF | 1 |
| GO:0005249 | MF | 1 | GO:0042925 | MF | 1 | GO:0008276 | MF | 1 |
| GO:0070041 | MF | 1 | GO:0008097 | MF | 1 | GO:0047631 | MF | 1 |
| GO:0070039 | MF | 1 | GO:0004490 | MF | 1 | GO:0047293 | MF | 1 |
| GO:0008198 | MF | 1 | GO:0018480 | MF | 1 | GO:0047693 | MF | 1 |
| GO:0050662 | MF | 1 | GO:0004658 | MF | 1 | GO:0047936 | MF | 1 |
| GO:0018685 | MF | 1 | GO:0102955 | MF | 1 | GO:0044668 | MF | 1 |

|            |    |   |            |    |   |            |    |   |
|------------|----|---|------------|----|---|------------|----|---|
| GO:0004526 | MF | 1 | GO:0071111 | MF | 1 | GO:0000009 | MF | 1 |
| GO:0004795 | MF | 1 | GO:0050484 | MF | 1 | GO:0070403 | MF | 1 |
| GO:0008695 | MF | 1 | GO:0008477 | MF | 1 | GO:0016773 | MF | 1 |
| GO:0052857 | MF | 1 | GO:0015662 | MF | 1 | GO:0033734 | MF | 1 |
| GO:0030283 | MF | 1 | GO:0008253 | MF | 1 | GO:0008874 | MF | 1 |
| GO:0004746 | MF | 1 | GO:0015188 | MF | 1 | GO:0004048 | MF | 1 |
| GO:0008839 | MF | 1 | GO:1901515 | MF | 1 | GO:0016788 | MF | 1 |
| GO:0004148 | MF | 1 | GO:0003856 | MF | 1 | GO:0008936 | MF | 1 |
| GO:0070040 | MF | 1 | GO:0045302 | MF | 1 | GO:0036055 | MF | 1 |
| GO:0008972 | MF | 1 | GO:0047265 | MF | 1 | GO:0070733 | MF | 1 |
| GO:0052823 | MF | 1 | GO:0004739 | MF | 1 | GO:0008797 | MF | 1 |
| GO:0089715 | MF | 1 | GO:0003860 | MF | 1 | GO:0004471 | MF | 1 |
| GO:0008889 | MF | 1 | GO:0030729 | MF | 1 | GO:0016823 | MF | 1 |
| GO:0102998 | MF | 1 | GO:0047646 | MF | 1 | GO:0008234 | MF | 1 |
| GO:0008452 | MF | 1 | GO:0008677 | MF | 1 | GO:0008657 | MF | 1 |
| GO:0008668 | MF | 1 | GO:0033608 | MF | 1 |            |    |   |
| GO:0016772 | MF | 1 | GO:0052654 | MF | 1 |            |    |   |
| GO:0008641 | MF | 1 | GO:0030973 | MF | 1 |            |    |   |
| GO:0031072 | MF | 1 | GO:0102264 | MF | 1 |            |    |   |
| GO:0004477 | MF | 1 | GO:0035596 | MF | 1 |            |    |   |
| GO:0052927 | MF | 1 | GO:0003979 | MF | 1 |            |    |   |
| GO:0015420 | MF | 1 | GO:0043725 | MF | 1 |            |    |   |
| GO:0003988 | MF | 1 | GO:0016631 | MF | 1 |            |    |   |
| GO:0016166 | MF | 1 | GO:0030674 | MF | 1 |            |    |   |
| GO:0050547 | MF | 1 | GO:0016614 | MF | 1 |            |    |   |
| GO:0070677 | MF | 1 | GO:0008762 | MF | 1 |            |    |   |
| GO:0004363 | MF | 1 | GO:0015205 | MF | 1 |            |    |   |
| GO:0008825 | MF | 1 | GO:0102523 | MF | 1 |            |    |   |
| GO:0005385 | MF | 1 | GO:0009378 | MF | 1 |            |    |   |
| GO:0009882 | MF | 1 | GO:0008685 | MF | 1 |            |    |   |
| GO:0004553 | MF | 1 | GO:0004417 | MF | 1 |            |    |   |
| GO:0016628 | MF | 1 | GO:0004623 | MF | 1 |            |    |   |
| GO:0008984 | MF | 1 | GO:0004309 | MF | 1 |            |    |   |
| GO:0042925 | MF | 1 | GO:1900750 | MF | 1 |            |    |   |
| GO:0008097 | MF | 1 | GO:0018774 | MF | 1 |            |    |   |
| GO:0004490 | MF | 1 | GO:0047780 | MF | 1 |            |    |   |
| GO:0018480 | MF | 1 | GO:0008976 | MF | 1 |            |    |   |
| GO:0004658 | MF | 1 | GO:0008456 | MF | 1 |            |    |   |
| GO:0102955 | MF | 1 | GO:0003746 | MF | 1 |            |    |   |
| GO:0071111 | MF | 1 | GO:0103068 | MF | 1 |            |    |   |
| GO:0050484 | MF | 1 | GO:0008168 | MF | 1 |            |    |   |
| GO:0008477 | MF | 1 | GO:0015192 | MF | 1 |            |    |   |
| GO:0015662 | MF | 1 | GO:0015655 | MF | 1 |            |    |   |
| GO:0008253 | MF | 1 | GO:0008718 | MF | 1 |            |    |   |
| GO:0015188 | MF | 1 | GO:0004640 | MF | 1 |            |    |   |

|            |    |   |            |    |   |
|------------|----|---|------------|----|---|
| GO:1901515 | MF | 1 | GO:0008703 | MF | 1 |
| GO:0003856 | MF | 1 | GO:0008666 | MF | 1 |
| GO:0045302 | MF | 1 | GO:0033897 | MF | 1 |
| GO:0047265 | MF | 1 | GO:0003922 | MF | 1 |
| GO:0004739 | MF | 1 | GO:0051500 | MF | 1 |
| GO:0003860 | MF | 1 | GO:0004733 | MF | 1 |
| GO:0030729 | MF | 1 | GO:0043115 | MF | 1 |
| GO:0047646 | MF | 1 | GO:0070038 | MF | 1 |
| GO:0008677 | MF | 1 | GO:0004176 | MF | 1 |
| GO:0033608 | MF | 1 | GO:0004180 | MF | 1 |
| GO:0052654 | MF | 1 | GO:0008662 | MF | 1 |
| GO:0030973 | MF | 1 | GO:0050194 | MF | 1 |
| GO:0102264 | MF | 1 | GO:0034909 | MF | 1 |
| GO:0035596 | MF | 1 | GO:0004644 | MF | 1 |
| GO:0003979 | MF | 1 | GO:0004826 | MF | 1 |
| GO:0043725 | MF | 1 | GO:0004450 | MF | 1 |
| GO:0016631 | MF | 1 | GO:0042803 | MF | 1 |
| GO:0030674 | MF | 1 | GO:0043799 | MF | 1 |
| GO:0016614 | MF | 1 | GO:0004735 | MF | 1 |
| GO:0008762 | MF | 1 | GO:0008728 | MF | 1 |
| GO:0015205 | MF | 1 | GO:0031419 | MF | 1 |
| GO:0102523 | MF | 1 | GO:0015175 | MF | 1 |
| GO:0009378 | MF | 1 | GO:0003884 | MF | 1 |
| GO:0008685 | MF | 1 | GO:0009032 | MF | 1 |
| GO:0004417 | MF | 1 | GO:0030366 | MF | 1 |
| GO:0004623 | MF | 1 | GO:0004617 | MF | 1 |
| GO:0004309 | MF | 1 | GO:0045340 | MF | 1 |
| GO:1900750 | MF | 1 | GO:0047445 | MF | 1 |
| GO:0018774 | MF | 1 | GO:0061603 | MF | 1 |
| GO:0047780 | MF | 1 | GO:0003727 | MF | 1 |
| GO:0008976 | MF | 1 | GO:0035595 | MF | 1 |
| GO:0008456 | MF | 1 | GO:0004799 | MF | 1 |
| GO:0003746 | MF | 1 | GO:0004364 | MF | 1 |
| GO:0103068 | MF | 1 | GO:0047475 | MF | 1 |
| GO:0008168 | MF | 1 | GO:0008908 | MF | 1 |
| GO:0009002 | MF | 1 | GO:0015181 | MF | 1 |
| GO:0015655 | MF | 1 | GO:0015444 | MF | 1 |
| GO:0008718 | MF | 1 | GO:0018633 | MF | 1 |
| GO:0004640 | MF | 1 | GO:0004601 | MF | 1 |
| GO:0008703 | MF | 1 | GO:0008872 | MF | 1 |
| GO:0008666 | MF | 1 | GO:0052587 | MF | 1 |
| GO:0033897 | MF | 1 | GO:0016818 | MF | 1 |
| GO:0003922 | MF | 1 | GO:0009013 | MF | 1 |
| GO:0051500 | MF | 1 | GO:0043175 | MF | 1 |
| GO:0004733 | MF | 1 | GO:0015106 | MF | 1 |

|            |    |   |            |    |   |
|------------|----|---|------------|----|---|
| GO:0043115 | MF | 1 | GO:0042945 | MF | 1 |
| GO:0070038 | MF | 1 | GO:0004643 | MF | 1 |
| GO:0004176 | MF | 1 | GO:0004114 | MF | 1 |
| GO:0004180 | MF | 1 | GO:0042931 | MF | 1 |
| GO:0008662 | MF | 1 | GO:0004174 | MF | 1 |
| GO:0050194 | MF | 1 | GO:0015136 | MF | 1 |
| GO:0034909 | MF | 1 | GO:0005302 | MF | 1 |
| GO:0004644 | MF | 1 | GO:0004456 | MF | 1 |
| GO:0004826 | MF | 1 | GO:0001072 | MF | 1 |
| GO:0004450 | MF | 1 | GO:0015077 | MF | 1 |
| GO:0043799 | MF | 1 | GO:0015137 | MF | 1 |
| GO:0004735 | MF | 1 | GO:0008970 | MF | 1 |
| GO:0008728 | MF | 1 | GO:0015171 | MF | 1 |
| GO:0031419 | MF | 1 | GO:0008965 | MF | 1 |
| GO:0015175 | MF | 1 | GO:0050501 | MF | 1 |
| GO:0003884 | MF | 1 | GO:0050093 | MF | 1 |
| GO:0009032 | MF | 1 | GO:0016810 | MF | 1 |
| GO:0030366 | MF | 1 | GO:0036054 | MF | 1 |
| GO:0004617 | MF | 1 | GO:0004591 | MF | 1 |
| GO:0045340 | MF | 1 | GO:0046565 | MF | 1 |
| GO:0047445 | MF | 1 | GO:0017089 | MF | 1 |
| GO:0061603 | MF | 1 | GO:0000062 | MF | 1 |
| GO:0003727 | MF | 1 | GO:0004807 | MF | 1 |
| GO:0035595 | MF | 1 | GO:0062101 | MF | 1 |
| GO:0004799 | MF | 1 | GO:0047425 | MF | 1 |
| GO:0004364 | MF | 1 | GO:0060698 | MF | 1 |
| GO:0047475 | MF | 1 | GO:0033727 | MF | 1 |
| GO:0008908 | MF | 1 | GO:0016840 | MF | 1 |
| GO:0015181 | MF | 1 | GO:0004754 | MF | 1 |
| GO:0015444 | MF | 1 | GO:0009883 | MF | 1 |
| GO:0018633 | MF | 1 | GO:0018627 | MF | 1 |
| GO:0004601 | MF | 1 | GO:0016853 | MF | 1 |
| GO:0008872 | MF | 1 | GO:0004806 | MF | 1 |
| GO:0052587 | MF | 1 | GO:0004049 | MF | 1 |
| GO:0016818 | MF | 1 | GO:0047527 | MF | 1 |
| GO:0009013 | MF | 1 | GO:0004150 | MF | 1 |
| GO:0043175 | MF | 1 | GO:0004834 | MF | 1 |
| GO:0015106 | MF | 1 | GO:0004515 | MF | 1 |
| GO:0042945 | MF | 1 | GO:0004851 | MF | 1 |
| GO:0004643 | MF | 1 | GO:0004175 | MF | 1 |
| GO:0004114 | MF | 1 | GO:0018626 | MF | 1 |
| GO:0042931 | MF | 1 | GO:0004121 | MF | 1 |
| GO:0004174 | MF | 1 | GO:0008818 | MF | 1 |
| GO:0015136 | MF | 1 | GO:0008935 | MF | 1 |
| GO:0004456 | MF | 1 | GO:0071972 | MF | 1 |

|            |    |   |            |    |   |
|------------|----|---|------------|----|---|
| GO:0001072 | MF | 1 | GO:0008893 | MF | 1 |
| GO:0015077 | MF | 1 | GO:0043866 | MF | 1 |
| GO:0015137 | MF | 1 | GO:0046429 | MF | 1 |
| GO:0008970 | MF | 1 | GO:0004324 | MF | 1 |
| GO:0015171 | MF | 1 | GO:0008692 | MF | 1 |
| GO:0008965 | MF | 1 | GO:0034040 | MF | 1 |
| GO:0050501 | MF | 1 | GO:0047922 | MF | 1 |
| GO:0050093 | MF | 1 | GO:1990610 | MF | 1 |
| GO:0016810 | MF | 1 | GO:0008835 | MF | 1 |
| GO:0036054 | MF | 1 | GO:0052873 | MF | 1 |
| GO:0004591 | MF | 1 | GO:0047154 | MF | 1 |
| GO:0046565 | MF | 1 | GO:0047689 | MF | 1 |
| GO:0017089 | MF | 1 | GO:0008320 | MF | 1 |
| GO:0000062 | MF | 1 | GO:0016763 | MF | 1 |
| GO:0050357 | MF | 1 | GO:0047569 | MF | 1 |
| GO:0004807 | MF | 1 | GO:0046961 | MF | 1 |
| GO:0062101 | MF | 1 | GO:0017150 | MF | 1 |
| GO:0047425 | MF | 1 | GO:0016150 | MF | 1 |
| GO:0060698 | MF | 1 | GO:0018842 | MF | 1 |
| GO:0033727 | MF | 1 | GO:0004636 | MF | 1 |
| GO:0016840 | MF | 1 | GO:0015159 | MF | 1 |
| GO:0004754 | MF | 1 | GO:0052666 | MF | 1 |
| GO:0009883 | MF | 1 | GO:0051903 | MF | 1 |
| GO:0018627 | MF | 1 | GO:0004514 | MF | 1 |
| GO:0016853 | MF | 1 | GO:0120159 | MF | 1 |
| GO:0004806 | MF | 1 | GO:0008484 | MF | 1 |
| GO:0004049 | MF | 1 | GO:0008836 | MF | 1 |
| GO:0047527 | MF | 1 | GO:0008840 | MF | 1 |
| GO:0004150 | MF | 1 | GO:0000774 | MF | 1 |
| GO:0004834 | MF | 1 | GO:0045551 | MF | 1 |
| GO:0004515 | MF | 1 | GO:0000175 | MF | 1 |
| GO:0004851 | MF | 1 | GO:0008691 | MF | 1 |
| GO:0004175 | MF | 1 | GO:0019862 | MF | 1 |
| GO:0004121 | MF | 1 | GO:0003848 | MF | 1 |
| GO:0008818 | MF | 1 | GO:0102025 | MF | 1 |
| GO:0008935 | MF | 1 | GO:0008785 | MF | 1 |
| GO:0071972 | MF | 1 | GO:0005216 | MF | 1 |
| GO:0008893 | MF | 1 | GO:0004748 | MF | 1 |
| GO:0043866 | MF | 1 | GO:0047448 | MF | 1 |
| GO:0046429 | MF | 1 | GO:0003951 | MF | 1 |
| GO:0004324 | MF | 1 | GO:0018492 | MF | 1 |
| GO:0008692 | MF | 1 | GO:0008659 | MF | 1 |
| GO:0034040 | MF | 1 | GO:0033735 | MF | 1 |
| GO:0047922 | MF | 1 | GO:0140078 | MF | 1 |
| GO:1990610 | MF | 1 | GO:0015379 | MF | 1 |

|            |    |   |            |    |   |
|------------|----|---|------------|----|---|
| GO:0008835 | MF | 1 | GO:0004301 | MF | 1 |
| GO:0052873 | MF | 1 | GO:0004072 | MF | 1 |
| GO:0047154 | MF | 1 | GO:0004714 | MF | 1 |
| GO:0047689 | MF | 1 | GO:0004397 | MF | 1 |
| GO:0008320 | MF | 1 | GO:0103046 | MF | 1 |
| GO:0016763 | MF | 1 | GO:0008886 | MF | 1 |
| GO:0047569 | MF | 1 | GO:0046316 | MF | 1 |
| GO:0046961 | MF | 1 | GO:0034257 | MF | 1 |
| GO:0017150 | MF | 1 | GO:0000104 | MF | 1 |
| GO:0008144 | MF | 1 | GO:0033812 | MF | 1 |
| GO:0016150 | MF | 1 | GO:0008276 | MF | 1 |
| GO:0018842 | MF | 1 | GO:0047631 | MF | 1 |
| GO:0004636 | MF | 1 | GO:0047293 | MF | 1 |
| GO:0015159 | MF | 1 | GO:0047693 | MF | 1 |
| GO:0052666 | MF | 1 | GO:0047936 | MF | 1 |
| GO:0051903 | MF | 1 | GO:0044668 | MF | 1 |
| GO:0004514 | MF | 1 | GO:0000009 | MF | 1 |
| GO:0120159 | MF | 1 | GO:0070403 | MF | 1 |
| GO:0008484 | MF | 1 | GO:0016773 | MF | 1 |
| GO:0008836 | MF | 1 | GO:0033734 | MF | 1 |
| GO:0008840 | MF | 1 | GO:0008874 | MF | 1 |
| GO:0000774 | MF | 1 | GO:0004048 | MF | 1 |
| GO:0045551 | MF | 1 | GO:0016788 | MF | 1 |
| GO:0000175 | MF | 1 | GO:0008936 | MF | 1 |
| GO:0008691 | MF | 1 | GO:0036055 | MF | 1 |
| GO:0019862 | MF | 1 | GO:0070733 | MF | 1 |
| GO:0003848 | MF | 1 | GO:0008797 | MF | 1 |
| GO:0102025 | MF | 1 | GO:0004471 | MF | 1 |
| GO:0008785 | MF | 1 | GO:0010181 | MF | 1 |
| GO:0004314 | MF | 1 | GO:0016823 | MF | 1 |
| GO:0005216 | MF | 1 | GO:0008234 | MF | 1 |
| GO:0004748 | MF | 1 | GO:0008657 | MF | 1 |
| GO:0047448 | MF | 1 |            |    |   |
| GO:0003951 | MF | 1 |            |    |   |
| GO:0018492 | MF | 1 |            |    |   |
| GO:0008659 | MF | 1 |            |    |   |
| GO:0033735 | MF | 1 |            |    |   |
| GO:0140078 | MF | 1 |            |    |   |
| GO:0004519 | MF | 1 |            |    |   |
| GO:0015379 | MF | 1 |            |    |   |
| GO:0004301 | MF | 1 |            |    |   |
| GO:0004072 | MF | 1 |            |    |   |
| GO:0004714 | MF | 1 |            |    |   |
| GO:0004397 | MF | 1 |            |    |   |
| GO:0103046 | MF | 1 |            |    |   |



|            |    |   |
|------------|----|---|
| GO:0008886 | MF | 1 |
| GO:0046316 | MF | 1 |
| GO:0034257 | MF | 1 |
| GO:0000104 | MF | 1 |
| GO:0033812 | MF | 1 |
| GO:0008276 | MF | 1 |
| GO:0047631 | MF | 1 |
| GO:0047293 | MF | 1 |
| GO:0047693 | MF | 1 |
| GO:0008658 | MF | 1 |
| GO:0047936 | MF | 1 |
| GO:0044668 | MF | 1 |
| GO:0000009 | MF | 1 |
| GO:0008882 | MF | 1 |
| GO:0070403 | MF | 1 |
| GO:0016773 | MF | 1 |
| GO:0033734 | MF | 1 |
| GO:0008874 | MF | 1 |
| GO:0004048 | MF | 1 |
| GO:0016788 | MF | 1 |
| GO:0008936 | MF | 1 |
| GO:0036055 | MF | 1 |
| GO:0008797 | MF | 1 |
| GO:0004471 | MF | 1 |
| GO:0016823 | MF | 1 |
| GO:0008234 | MF | 1 |
| GO:0008657 | MF | 1 |

Table S4. GO enrichment study results for the GO terms related to carbon catabolome

| Ptolemy    |    |       | Panaroo    |    |      | PIRATE     |    |      | PPanGGolin |    |      | Roary      |    |      |
|------------|----|-------|------------|----|------|------------|----|------|------------|----|------|------------|----|------|
| GO         | NS | pval  | GO         | NS | pval | GO         | NS | pval | GO         | NS | pval | GO         | NS | pval |
| GO:0055072 | BP | 1E-21 | GO:0006313 | BP | 0.00 | GO:0006313 | BP | 0.00 | GO:0055072 | BP | 0.00 | GO:0006313 | BP | 0.00 |
| GO:0030435 | BP | 2E-20 | GO:0055072 | BP | 0.00 | GO:0055072 | BP | 0.00 | GO:0006313 | BP | 0.00 | GO:0055072 | BP | 0.00 |
| GO:0006974 | BP | 7E-20 | GO:0033214 | BP | 0.00 | GO:0051518 | BP | 0.00 | GO:0006974 | BP | 0.00 | GO:0033214 | BP | 0.00 |
| GO:0045892 | BP | 3E-17 | GO:0075139 | BP | 0.00 | GO:0075139 | BP | 0.00 | GO:0033214 | BP | 0.00 | GO:0009405 | BP | 0.00 |
| GO:0009405 | BP | 1E-16 | GO:0044847 | BP | 0.00 | GO:0044847 | BP | 0.00 | GO:0009405 | BP | 0.00 | GO:0075139 | BP | 0.00 |
| GO:0009314 | BP | 1E-16 | GO:0010106 | BP | 0.00 | GO:0010106 | BP | 0.00 | GO:0046677 | BP | 0.00 | GO:0044847 | BP | 0.00 |
| GO:0019439 | BP | 2E-12 | GO:0015891 | BP | 0.00 | GO:0015891 | BP | 0.00 | GO:0045892 | BP | 0.00 | GO:0019439 | BP | 0.00 |
| GO:0009636 | BP | 4E-11 | GO:0032196 | BP | 0.00 | GO:0010165 | BP | 0.00 | GO:0051607 | BP | 0.00 | GO:0010106 | BP | 0.00 |
| GO:0033214 | BP | 5E-10 | GO:0019439 | BP | 0.00 | GO:0051289 | BP | 0.00 | GO:0019439 | BP | 0.00 | GO:0015891 | BP | 0.00 |
| GO:0042493 | BP | 8E-10 | GO:0007231 | BP | 0.00 | GO:0033214 | BP | 0.00 | GO:0046279 | BP | 0.00 | GO:0006974 | BP | 0.00 |
| GO:0051607 | BP | 2E-09 | GO:0071474 | BP | 0.00 | GO:0006974 | BP | 0.02 | GO:0019630 | BP | 0.00 | GO:0032196 | BP | 0.00 |
| GO:0046677 | BP | 3E-09 | GO:0071475 | BP | 0.00 | GO:0045893 | BP | 0.03 | GO:0030435 | BP | 0.00 | GO:0046677 | BP | 0.00 |
| GO:0006351 | BP | 4E-09 | GO:1905647 | BP | 0.00 | GO:0000746 | BP | 0.04 | GO:0042493 | BP | 0.00 | GO:0000302 | BP | 0.00 |
| GO:0015827 | BP | 5E-09 | GO:0006826 | BP | 0.00 | GO:0042621 | BP | 0.04 | GO:0009636 | BP | 0.00 | GO:0045892 | BP | 0.00 |
| GO:0015823 | BP | 5E-09 | GO:0031460 | BP | 0.00 | GO:0019509 | BP | 0.04 | GO:0015828 | BP | 0.00 | GO:0051518 | BP | 0.00 |
| GO:0015828 | BP | 5E-09 | GO:0015828 | BP | 0.00 | GO:0019284 | BP | 0.04 | GO:0015827 | BP | 0.00 | GO:0071236 | BP | 0.00 |
| GO:0015685 | BP | 3E-07 | GO:0015827 | BP | 0.00 | GO:0009164 | BP | 0.04 | GO:0015823 | BP | 0.00 | GO:0051607 | BP | 0.00 |
| GO:0045893 | BP | 5E-07 | GO:0015823 | BP | 0.00 | GO:0009847 | BP | 0.04 | GO:0023014 | BP | 0.00 | GO:0044826 | BP | 0.00 |
| GO:0031460 | BP | 6E-07 | GO:0009405 | BP | 0.00 | GO:0071224 | BP | 0.04 | GO:0046777 | BP | 0.00 | GO:0046718 | BP | 0.00 |
| GO:0042930 | BP | 1E-06 | GO:0043953 | BP | 0.01 | GO:0045892 | BP | 0.04 | GO:0051518 | BP | 0.00 | GO:0009061 | BP | 0.00 |
| GO:0023014 | BP | 2E-06 | GO:0006310 | BP | 0.02 | GO:0006559 | BP | 0.06 | GO:0075139 | BP | 0.00 | GO:0032359 | BP | 0.00 |
| GO:0051289 | BP | 3E-06 | GO:0065002 | BP | 0.03 | GO:0006694 | BP | 0.06 | GO:0044847 | BP | 0.00 | GO:0007231 | BP | 0.00 |
| GO:0051596 | BP | 4E-06 | GO:0000746 | BP | 0.03 | GO:0042207 | BP | 0.06 | GO:0071236 | BP | 0.00 | GO:0071474 | BP | 0.00 |
| GO:0044355 | BP | 4E-06 | GO:0009847 | BP | 0.03 | GO:0019607 | BP | 0.06 | GO:0009061 | BP | 0.00 | GO:0071475 | BP | 0.00 |
| GO:0006101 | BP | 4E-06 | GO:0071224 | BP | 0.03 | GO:0071793 | BP | 0.06 | GO:0010106 | BP | 0.00 | GO:1905647 | BP | 0.00 |
| GO:0042968 | BP | 1E-05 | GO:0018117 | BP | 0.03 | GO:0009820 | BP | 0.06 | GO:0045227 | BP | 0.00 | GO:0031460 | BP | 0.00 |
| GO:0009061 | BP | 1E-05 | GO:0006584 | BP | 0.03 | GO:0009405 | BP | 0.07 | GO:0015891 | BP | 0.00 | GO:0006524 | BP | 0.00 |
| GO:0071978 | BP | 1E-05 | GO:0006559 | BP | 0.04 | GO:0006885 | BP | 0.07 | GO:0007231 | BP | 0.00 | GO:0015828 | BP | 0.00 |
| GO:0006302 | BP | 1E-05 | GO:0010128 | BP | 0.04 | GO:0008156 | BP | 0.07 | GO:0071474 | BP | 0.00 | GO:0015827 | BP | 0.00 |
| GO:0030420 | BP | 1E-05 | GO:0006694 | BP | 0.04 | GO:0051595 | BP | 0.07 | GO:0071475 | BP | 0.00 | GO:0015823 | BP | 0.00 |
| GO:0000028 | BP | 1E-05 | GO:0042207 | BP | 0.04 | GO:0044826 | BP | 0.08 | GO:1905647 | BP | 0.00 | GO:0042918 | BP | 0.00 |
| GO:0071474 | BP | 3E-05 | GO:0019607 | BP | 0.04 | GO:0046718 | BP | 0.08 | GO:0045893 | BP | 0.00 | GO:0010165 | BP | 0.00 |
| GO:0071475 | BP | 3E-05 | GO:0071793 | BP | 0.04 | GO:0046196 | BP | 0.08 | GO:0015685 | BP | 0.00 | GO:0043201 | BP | 0.00 |
| GO:0032359 | BP | 3E-05 | GO:0006885 | BP | 0.06 | GO:0032359 | BP | 0.10 | GO:0031460 | BP | 0.00 | GO:0006826 | BP | 0.00 |
| GO:1905647 | BP | 3E-05 | GO:0051595 | BP | 0.06 | GO:0008152 | BP | 0.10 | GO:0006524 | BP | 0.00 | GO:0030435 | BP | 0.01 |
| GO:0007231 | BP | 3E-05 | GO:0006811 | BP | 0.06 | GO:0042493 | BP | 0.11 | GO:0042918 | BP | 0.00 | GO:0045893 | BP | 0.01 |
| GO:0009411 | BP | 5E-05 | GO:0044826 | BP | 0.07 | GO:0030497 | BP | 0.11 | GO:0042930 | BP | 0.00 | GO:0009314 | BP | 0.01 |
| GO:0030488 | BP | 5E-05 | GO:0046718 | BP | 0.07 | GO:0006524 | BP | 0.14 | GO:0010165 | BP | 0.00 | GO:0009060 | BP | 0.02 |
| GO:1990961 | BP | 1E-04 | GO:0046196 | BP | 0.07 | GO:0042918 | BP | 0.14 | GO:0043201 | BP | 0.00 | GO:0006310 | BP | 0.02 |
| GO:0042918 | BP | 1E-04 | GO:0032359 | BP | 0.08 | GO:0043201 | BP | 0.14 | GO:0032196 | BP | 0.00 | GO:0008152 | BP | 0.02 |
| GO:0000455 | BP | 1E-04 | GO:0030497 | BP | 0.10 | GO:0006826 | BP | 0.15 | GO:0006559 | BP | 0.00 | GO:0007059 | BP | 0.03 |
| GO:0043201 | BP | 1E-04 | GO:0006524 | BP | 0.12 | GO:0046677 | BP | 0.22 | GO:0055070 | BP | 0.00 | GO:0009246 | BP | 0.03 |
| GO:0006524 | BP | 1E-04 | GO:0043201 | BP | 0.12 | GO:0030435 | BP | 0.27 | GO:0032885 | BP | 0.00 | GO:0015740 | BP | 0.03 |
| GO:0044119 | BP | 2E-04 | GO:0051289 | BP | 0.15 | GO:0019439 | BP | 0.29 | GO:0010332 | BP | 0.00 | GO:1901381 | BP | 0.03 |
| GO:0046777 | BP | 2E-04 | GO:0009314 | BP | 0.31 | GO:0032196 | BP | 0.70 | GO:0006065 | BP | 0.00 | GO:0032414 | BP | 0.03 |
| GO:0055114 | BP | 2E-04 | GO:0045892 | BP | 0.33 | GO:0006468 | BP | 0.74 | GO:0006418 | BP | 0.00 | GO:0046653 | BP | 0.03 |

|            |    |       |            |    |      |            |    |      |            |    |      |            |    |      |
|------------|----|-------|------------|----|------|------------|----|------|------------|----|------|------------|----|------|
| GO:0044718 | BP | 3E-04 | GO:0009308 | BP | 0.44 | GO:0017000 | BP | 0.82 | GO:0016540 | BP | 0.00 | GO:0009847 | BP | 0.03 |
| GO:0071292 | BP | 3E-04 | GO:0006468 | BP | 0.65 | GO:0006790 | BP | 0.83 | GO:0051171 | BP | 0.00 | GO:0071224 | BP | 0.03 |
| GO:0019853 | BP | 3E-04 | GO:0017000 | BP | 0.74 | GO:0006750 | BP | 0.83 | GO:0015921 | BP | 0.00 | GO:0033252 | BP | 0.03 |
| GO:0055070 | BP | 3E-04 | GO:0030091 | BP | 0.85 | GO:0000820 | BP | 0.83 | GO:0019853 | BP | 0.00 | GO:0050845 | BP | 0.03 |
| GO:0010332 | BP | 3E-04 | GO:0009636 | BP | 0.86 | GO:0006633 | BP | 0.83 | GO:0006014 | BP | 0.00 | GO:0009243 | BP | 0.03 |
| GO:0031118 | BP | 3E-04 | GO:0007165 | BP | 1    | GO:0000453 | BP | 0.83 | GO:0009697 | BP | 0.00 | GO:0043953 | BP | 0.04 |
| GO:0006527 | BP | 3E-04 | GO:0008152 | BP | 1    | GO:0009636 | BP | 0.83 | GO:0031638 | BP | 0.00 | GO:0033539 | BP | 0.04 |
| GO:0042856 | BP | 3E-04 | GO:0019285 | BP | 1    | GO:0006275 | BP | 0.83 | GO:0110051 | BP | 0.00 | GO:0006283 | BP | 0.04 |
| GO:0046292 | BP | 3E-04 | GO:0015074 | BP | 1    | GO:0015990 | BP | 0.83 | GO:0042207 | BP | 0.00 | GO:0006559 | BP | 0.04 |
| GO:0018106 | BP | 3E-04 | GO:0045893 | BP | 1    | GO:0006423 | BP | 0.83 | GO:0019607 | BP | 0.00 | GO:0055070 | BP | 0.04 |
| GO:0006559 | BP | 3E-04 | GO:0006813 | BP | 1    | GO:0009252 | BP | 0.89 | GO:0047484 | BP | 0.00 | GO:0075713 | BP | 0.04 |
| GO:0019608 | BP | 3E-04 | GO:0007059 | BP | 1    | GO:0000027 | BP | 0.98 | GO:0019608 | BP | 0.00 | GO:0006527 | BP | 0.04 |
| GO:0047484 | BP | 3E-04 | GO:0009435 | BP | 1    | GO:0008360 | BP | 1    | GO:0009820 | BP | 0.00 | GO:0032885 | BP | 0.04 |
| GO:0009697 | BP | 3E-04 | GO:0055114 | BP | 1    | GO:0071555 | BP | 1    | GO:0042856 | BP | 0.00 | GO:0006418 | BP | 0.04 |
| GO:0009820 | BP | 3E-04 | GO:0006633 | BP | 1    | GO:0007165 | BP | 1    | GO:0019271 | BP | 0.00 | GO:0030641 | BP | 0.04 |
| GO:0019607 | BP | 3E-04 | GO:0006865 | BP | 1    | GO:0009060 | BP | 1    | GO:0006885 | BP | 0.00 | GO:0015921 | BP | 0.04 |
| GO:0006537 | BP | 4E-04 | GO:0016042 | BP | 1    | GO:0006270 | BP | 1    | GO:0051596 | BP | 0.00 | GO:0010128 | BP | 0.04 |
| GO:0009060 | BP | 6E-04 | GO:0006979 | BP | 1    | GO:0006631 | BP | 1    | GO:0008156 | BP | 0.00 | GO:0006694 | BP | 0.04 |
| GO:0032196 | BP | 8E-04 | GO:0005886 | CC | 0.00 | GO:0019285 | BP | 1    | GO:0006071 | BP | 0.00 | GO:0110051 | BP | 0.04 |
| GO:1901998 | BP | 9E-04 | GO:0005887 | CC | 0.00 | GO:0043953 | BP | 1    | GO:2000142 | BP | 0.00 | GO:0042207 | BP | 0.04 |
| GO:0008156 | BP | 9E-04 | GO:0000229 | CC | 0.00 | GO:0009408 | BP | 1    | GO:0044355 | BP | 0.00 | GO:0019607 | BP | 0.04 |
| GO:0071468 | BP | 9E-04 | GO:0033281 | CC | 0.01 | GO:0042908 | BP | 1    | GO:0006276 | BP | 0.00 | GO:0019608 | BP | 0.04 |
| GO:0006885 | BP | 9E-04 | GO:0005623 | CC | 0.04 | GO:0009102 | BP | 1    | GO:0051595 | BP | 0.00 | GO:0071793 | BP | 0.04 |
| GO:0071236 | BP | 9E-04 | GO:0005829 | CC | 0.05 | GO:0006813 | BP | 1    | GO:0043448 | BP | 0.00 | GO:0009820 | BP | 0.04 |
| GO:0051518 | BP | 9E-04 | GO:0032993 | CC | 0.41 | GO:0065002 | BP | 1    | GO:0071468 | BP | 0.00 | GO:0019570 | BP | 0.04 |
| GO:0043448 | BP | 9E-04 | GO:0030956 | CC | 0.83 | GO:0000917 | BP | 1    | GO:1901998 | BP | 0.00 | GO:0006878 | BP | 0.05 |
| GO:0051595 | BP | 9E-04 | GO:0016020 | CC | 1    | GO:0006730 | BP | 1    | GO:0006479 | BP | 0.00 | GO:0000746 | BP | 0.05 |
| GO:0009451 | BP | 9E-04 | GO:0009279 | CC | 1    | GO:0009086 | BP | 1    | GO:0000302 | BP | 0.00 | GO:0009636 | BP | 0.05 |
| GO:0006276 | BP | 9E-04 | GO:0030288 | CC | 1    | GO:0006355 | BP | 1    | GO:0009314 | BP | 0.00 | GO:0022900 | BP | 0.06 |
| GO:0006631 | BP | 2E-03 | GO:0042597 | CC | 1    | GO:0042773 | BP | 1    | GO:0019563 | BP | 0.00 | GO:0019271 | BP | 0.06 |
| GO:0051085 | BP | 2E-03 | GO:0004803 | MF | 0.00 | GO:0006807 | BP | 1    | GO:0009060 | BP | 0.00 | GO:0006885 | BP | 0.06 |
| GO:0010795 | BP | 2E-03 | GO:0003677 | MF | 0.00 | GO:0009435 | BP | 1    | GO:0046687 | BP | 0.00 | GO:0044355 | BP | 0.06 |
| GO:0044826 | BP | 2E-03 | GO:0009977 | MF | 0.00 | GO:0043093 | BP | 1    | GO:0046196 | BP | 0.00 | GO:0051595 | BP | 0.06 |
| GO:0046196 | BP | 2E-03 | GO:0042802 | MF | 0.00 | GO:0055114 | BP | 1    | GO:0006302 | BP | 0.00 | GO:0043448 | BP | 0.06 |
| GO:0046718 | BP | 2E-03 | GO:0005297 | MF | 0.00 | GO:0016042 | BP | 1    | GO:0071978 | BP | 0.00 | GO:0071468 | BP | 0.06 |
| GO:0046687 | BP | 2E-03 | GO:0015343 | MF | 0.00 | GO:0015628 | BP | 1    | GO:0030488 | BP | 0.00 | GO:1901998 | BP | 0.06 |
| GO:0007059 | BP | 2E-03 | GO:0015196 | MF | 0.00 | GO:0015074 | BP | 1    | GO:0006970 | BP | 0.00 | GO:0046196 | BP | 0.07 |
| GO:0019630 | BP | 2E-03 | GO:0015192 | MF | 0.00 | GO:0006260 | BP | 1    | GO:0009408 | BP | 0.00 | GO:0071978 | BP | 0.07 |
| GO:0046279 | BP | 2E-03 | GO:0005302 | MF | 0.00 | GO:0000160 | BP | 1    | GO:0006351 | BP | 0.01 | GO:0019619 | BP | 0.08 |
| GO:0022900 | BP | 3E-03 | GO:0015643 | MF | 0.00 | GO:0006310 | BP | 1    | GO:0007059 | BP | 0.01 | GO:0065002 | BP | 0.09 |
| GO:0006970 | BP | 4E-03 | GO:0004724 | MF | 0.03 | GO:0006457 | BP | 1    | GO:0033539 | BP | 0.01 | GO:0046279 | BP | 0.09 |
| GO:0009409 | BP | 4E-03 | GO:0047106 | MF | 0.03 | GO:0051301 | BP | 1    | GO:0008152 | BP | 0.01 | GO:0019630 | BP | 0.09 |
| GO:0010165 |    |       | GO:0052595 |    |      | GO:0005886 |    | 2E-  | GO:0000453 |    |      | GO:0015685 |    |      |
|            | BP | 6E-03 |            | MF | 0.04 |            | CC | 28   |            | BP | 0.01 |            | BP | 0.10 |

|            |    |       |            |    |            |     |            |            |            |      |            |    |      |
|------------|----|-------|------------|----|------------|-----|------------|------------|------------|------|------------|----|------|
| GO:0017000 |    |       | GO:0052596 |    | GO:0005829 | 5E- | GO:0006270 |            | GO:0042493 |      |            |    |      |
|            | BP | 2E-02 |            | MF | 0.04       | CC  | 10         | BP         | 0.01       | BP   | 0.10       |    |      |
| GO:0006790 |    |       | GO:0052593 |    | GO:0045272 | 4E- | GO:0022900 |            | GO:0006855 |      |            |    |      |
|            | BP | 3E-02 |            | MF | 0.04       | CC  | 04         | BP         | 0.01       | BP   | 0.10       |    |      |
| GO:0050821 |    |       | GO:0052594 |    | GO:0005887 | 4E- | GO:1990961 |            | GO:0030497 |      |            |    |      |
|            | BP | 3E-02 |            | MF | 0.04       | CC  | 02         | BP         | 0.01       | BP   | 0.10       |    |      |
| GO:0009399 |    |       | GO:0008979 |    | GO:0030964 | 4E- | GO:0009399 |            | GO:0042930 |      |            |    |      |
|            | BP | 3E-02 |            | MF | 0.04       | CC  | 02         | BP         | 0.01       | BP   | 0.13       |    |      |
| GO:0008152 |    |       | GO:0008957 |    | GO:0000229 | 6E- | GO:0006631 |            | GO:0006811 |      |            |    |      |
|            | BP | 3E-02 |            | MF | 0.05       | CC  | 02         | BP         | 0.02       | BP   | 0.14       |    |      |
| GO:0000725 |    |       | GO:0015503 |    | GO:0005634 | 7E- | GO:0019619 |            | GO:0045454 |      |            |    |      |
|            | BP | 3E-02 |            | MF | 0.06       | CC  | 02         | BP         | 0.02       | BP   | 0.14       |    |      |
| GO:0000724 |    |       | GO:0008793 |    | GO:0009274 | 8E- | GO:0046392 |            | GO:0051289 |      |            |    |      |
|            | BP | 3E-02 |            | MF | 0.06       | CC  | 02         | BP         | 0.02       | BP   | 0.15       |    |      |
| GO:0046294 |    |       | GO:0019899 |    | GO:0016020 | 1E- | GO:0006635 |            | GO:0055114 |      |            |    |      |
|            | BP | 3E-02 |            | MF | 0.06       | CC  | 01         | BP         | 0.02       | BP   | 0.25       |    |      |
| GO:0051096 |    |       | GO:0070733 |    | GO:0032993 | 5E- | GO:0042838 |            | GO:0006635 |      |            |    |      |
|            | BP | 3E-02 |            | MF | 0.06       | CC  | 01         | BP         | 0.02       | BP   | 0.28       |    |      |
| GO:0033585 |    |       | GO:0042626 |    | GO:0031226 | 8E- | GO:0042952 |            | GO:0043165 |      |            |    |      |
|            | BP | 3E-02 |            | MF | 0.06       | CC  | 01         | BP         | 0.02       | BP   | 0.28       |    |      |
| GO:0018153 |    |       | GO:0036382 |    | GO:0030288 | 9E- | GO:0006826 |            | GO:0042952 |      |            |    |      |
|            | BP | 3E-02 |            | MF | 0.06       | CC  | 01         | BP         | 0.03       | BP   | 0.29       |    |      |
| GO:0071287 |    |       | GO:0046790 |    | GO:0042597 | CC  | 1          | GO:0043165 | BP         | 0.03 | GO:0009408 | BP | 0.34 |
| GO:0071289 |    |       | GO:0004722 |    | GO:0033281 | CC  | 1          | GO:0019509 | BP         | 0.03 | GO:0051205 | BP | 0.46 |
| GO:0015967 |    |       | GO:0000986 |    | GO:0005623 | CC  | 1          | GO:0019284 | BP         | 0.03 | GO:0043571 | BP | 0.49 |
| GO:0120009 |    |       | GO:0038023 |    | GO:0032153 | CC  | 1          | GO:0042873 | BP         | 0.03 | GO:0006813 | BP | 0.53 |
| GO:0033022 |    |       | GO:0015344 |    | GO:0005737 | CC  | 1          | GO:0051290 | BP         | 0.03 | GO:1990961 | BP | 0.53 |
| GO:1900753 |    |       | GO:0019904 |    | GO:0015627 | CC  | 1          | GO:0019676 | BP         | 0.03 | GO:0006468 | BP | 0.68 |
| GO:0071218 |    |       | GO:0001217 |    | GO:0043190 | CC  | 1          | GO:0015740 | BP         | 0.03 | GO:0019344 | BP | 0.74 |
| GO:0071476 |    |       | GO:0000976 |    | GO:0004803 | MF  | 0.00       | GO:1901381 | BP         | 0.03 | GO:0017000 | BP | 0.76 |
| GO:0019878 |    |       | GO:0008131 |    | GO:0003677 | MF  | 0.00       | GO:0009416 | BP         | 0.03 | GO:0007049 | BP | 0.78 |
| GO:0009970 |    |       | GO:0033743 |    | GO:0042802 | MF  | 0.00       | GO:0001407 | BP         | 0.03 | GO:0006790 | BP | 0.78 |
| GO:0090527 |    |       | GO:0003917 |    | GO:0071723 | MF  | 0.00       | GO:0019605 | BP         | 0.03 | GO:0000716 | BP | 0.78 |
| GO:0032414 |    |       | GO:0071949 |    | GO:0008144 | MF  | 0.00       | GO:0009164 | BP         | 0.03 | GO:0045150 | BP | 0.78 |
| GO:1901381 |    |       | GO:0001216 |    | GO:0047106 | MF  | 0.04       | GO:0051096 | BP         | 0.03 | GO:0010033 | BP | 0.78 |
| GO:0045881 |    |       | GO:0000150 |    | GO:0015343 | MF  | 0.04       | GO:0019480 | BP         | 0.03 | GO:0046496 | BP | 0.78 |
| GO:0000731 |    |       | GO:0016887 |    | GO:0008955 | MF  | 0.04       | GO:0033477 | BP         | 0.03 | GO:0000820 | BP | 0.78 |
| GO:0071281 |    |       | GO:0036383 |    | GO:0009002 | MF  | 0.06       | GO:0032414 | BP         | 0.03 | GO:0043039 | BP | 0.78 |
| GO:0045848 |    |       | GO:0004674 |    | GO:0008979 | MF  | 0.06       | GO:0046653 | BP         | 0.03 | GO:0006857 | BP | 0.78 |
| GO:0097054 |    |       | GO:0048037 |    | GO:0008957 | MF  | 0.06       | GO:0009847 | BP         | 0.03 | GO:0019563 | BP | 0.78 |
| GO:0019292 |    |       | GO:0042803 |    | GO:0008658 | MF  | 0.07       | GO:0015794 | BP         | 0.03 | GO:0006435 | BP | 0.78 |
| GO:0000462 |    |       | GO:0018626 |    | GO:0015503 | MF  | 0.07       | GO:0036001 | BP         | 0.03 | GO:0030091 | BP | 0.78 |
| GO:0042938 |    |       | GO:0005524 |    | GO:0008793 | MF  | 0.07       | GO:0033528 | BP         | 0.03 | GO:0046168 | BP | 0.78 |
| GO:2000144 |    |       | GO:0000166 |    | GO:0019899 | MF  | 0.07       | GO:0019420 | BP         | 0.03 | GO:0000453 | BP | 0.78 |
| GO:0015739 |    |       | GO:0004029 |    | GO:0042626 | MF  | 0.07       | GO:0071224 | BP         | 0.03 | GO:0009244 | BP | 0.78 |
| GO:0071915 |    |       | GO:0004040 |    | GO:0048039 | MF  | 0.08       | GO:0033611 | BP         | 0.03 | GO:0015990 | BP | 0.79 |
| GO:0043215 |    |       | GO:0018618 |    | GO:0001000 | MF  | 0.08       | GO:0019878 | BP         | 0.03 | GO:0006423 | BP | 0.79 |
| GO:0045903 |    |       | GO:0004518 |    | GO:0042623 | MF  | 0.10       | GO:0006119 | BP         | 0.03 | GO:0009103 | BP | 0.82 |

|            |    |       |            |    |   |            |    |      |            |    |      |            |    |      |
|------------|----|-------|------------|----|---|------------|----|------|------------|----|------|------------|----|------|
| GO:0071280 | BP | 3E-02 | GO:0050567 | MF | 1 | GO:0009977 | MF | 0.11 | GO:0002049 | BP | 0.03 | GO:0045947 | BP | 0.82 |
| GO:0030253 | BP | 3E-02 | GO:0042834 | MF | 1 | GO:0000986 | MF | 0.13 | GO:0033252 | BP | 0.03 | GO:0000725 | BP | 0.82 |
| GO:0050845 | BP | 3E-02 | GO:0015299 | MF | 1 | GO:0042959 | MF | 0.14 | GO:0071578 | BP | 0.03 | GO:0019430 | BP | 0.83 |
| GO:0002049 | BP | 3E-02 | GO:0016616 | MF | 1 | GO:0015643 | MF | 0.15 | GO:0050845 | BP | 0.03 | GO:0006629 | BP | 0.88 |
| GO:0042621 | BP | 3E-02 | GO:0008802 | MF | 1 | GO:0001217 | MF | 0.26 | GO:0009243 | BP | 0.03 | GO:0000027 | BP | 0.91 |
| GO:0009822 | BP | 3E-02 | GO:0005506 | MF | 1 | GO:0000976 | MF | 0.43 | GO:0043085 | BP | 0.03 | GO:0017001 | BP | 1    |
| GO:0031669 | BP | 3E-02 | GO:0010181 | MF | 1 | GO:0050357 | MF | 0.74 | GO:0006584 | BP | 0.03 | GO:0015074 | BP | 1    |
| GO:0009246 | BP | 3E-02 | GO:0005507 | MF | 1 | GO:0016836 | MF | 0.83 | GO:0097054 | BP | 0.03 | GO:0006268 | BP | 1    |
| GO:0002099 | BP | 3E-02 | GO:0051537 | MF | 1 | GO:0047388 | MF | 0.83 | GO:0009851 | BP | 0.03 | GO:0006633 | BP | 1    |
| GO:0000154 | BP | 3E-02 | GO:0003678 | MF | 1 | GO:0004363 | MF | 0.83 | GO:0071555 | BP | 0.03 | GO:0007165 | BP | 1    |
| GO:0045911 | BP | 3E-02 | GO:0016627 | MF | 1 | GO:0008882 | MF | 0.83 | GO:0009308 | BP | 0.03 | GO:0034605 | BP | 1    |
| GO:0006532 | BP | 3E-02 | GO:0016757 | MF | 1 | GO:0004015 | MF | 0.83 | GO:0043571 | BP | 0.03 | GO:0071555 | BP | 1    |
| GO:0015794 | BP | 3E-02 | GO:0102132 | MF | 1 | GO:0004013 | MF | 0.83 | GO:0016310 | BP | 0.05 | GO:0000724 | BP | 1    |
| GO:0001407 | BP | 3E-02 | GO:0102131 | MF | 1 | GO:0019534 | MF | 0.83 | GO:0006268 | BP | 0.05 | GO:0036104 | BP | 1    |
| GO:0006729 | BP | 3E-02 | GO:0004316 | MF | 1 | GO:0003688 | MF | 0.83 | GO:0006283 | BP | 0.05 | GO:0006355 | BP | 1    |
| GO:0019480 | BP | 3E-02 | GO:0048038 | MF | 1 | GO:0008650 | MF | 0.83 | GO:0018106 | BP | 0.05 | GO:0006979 | BP | 1    |
| GO:0015970 | BP | 3E-02 | GO:0050661 | MF | 1 | GO:0004817 | MF | 0.84 | GO:1903830 | BP | 0.05 | GO:0009245 | BP | 1    |
| GO:0042873 | BP | 3E-02 | GO:0051287 | MF | 1 | GO:0003917 | MF | 0.86 | GO:0071286 | BP | 0.05 | GO:0006631 | BP | 1    |
| GO:0071578 | BP | 3E-02 | GO:0046872 | MF | 1 | GO:0001216 | MF | 1    | GO:0070415 | BP | 0.05 | GO:0019285 | BP | 1    |
| GO:0019684 | BP | 3E-02 | GO:0016491 | MF | 1 | GO:0008137 | MF | 1    | GO:0015889 | BP | 0.05 | GO:0061077 | BP | 1    |
| GO:0034775 | BP | 3E-02 |            |    |   | GO:0043565 | MF | 1    | GO:0001896 | BP | 0.05 | GO:0006097 | BP | 1    |
| GO:0015802 | BP | 3E-02 |            |    |   | GO:0016887 | MF | 1    | GO:0006527 | BP | 0.05 | GO:0019646 | BP | 1    |
| GO:0009243 | BP | 3E-02 |            |    |   | GO:0036383 | MF | 1    | GO:0009247 | BP | 0.05 | GO:0006144 | BP | 1    |
| GO:0071277 | BP | 3E-02 |            |    |   | GO:0004674 | MF | 1    | GO:0030641 | BP | 0.05 | GO:0006537 | BP | 1    |
| GO:0042355 | BP | 3E-02 |            |    |   | GO:0008519 | MF | 1    | GO:0000920 | BP | 0.05 | GO:0006417 | BP | 1    |
| GO:0015836 | BP | 3E-02 |            |    |   | GO:0016597 | MF | 1    | GO:0006694 | BP | 0.05 | GO:0009401 | BP | 1    |
| GO:0034470 | BP | 3E-02 |            |    |   | GO:0008930 | MF | 1    | GO:0046488 | BP | 0.05 | GO:0042908 | BP | 1    |
| GO:1901260 | BP | 3E-02 |            |    |   | GO:0008094 | MF | 1    | GO:0071793 | BP | 0.05 | GO:0009252 | BP | 1    |
| GO:0046680 | BP | 3E-02 |            |    |   | GO:0008782 | MF | 1    | GO:0046942 | BP | 0.05 | GO:0009102 | BP | 1    |
| GO:0015741 | BP | 3E-02 |            |    |   | GO:0004314 | MF | 1    | GO:0044718 | BP | 0.05 | GO:0006396 | BP | 1    |
| GO:0042743 | BP | 3E-02 |            |    |   | GO:0000166 | MF | 1    | GO:0019570 | BP | 0.05 | GO:0019545 | BP | 1    |
| GO:0043687 | BP | 3E-02 |            |    |   | GO:0005524 | MF | 1    | GO:0046292 | BP | 0.05 | GO:0046656 | BP | 1    |
| GO:0030042 | BP | 3E-02 |            |    |   | GO:0004029 | MF | 1    | GO:0010043 | BP | 0.05 | GO:0006265 | BP | 1    |
| GO:0044787 | BP | 3E-02 |            |    |   | GO:0004812 | MF | 1    | GO:0006108 | BP | 0.05 | GO:0010124 | BP | 1    |
| GO:0034204 | BP | 3E-02 |            |    |   | GO:0042834 | MF | 1    | GO:0006310 | BP | 0.06 | GO:0051301 | BP | 1    |
| GO:0015812 | BP | 3E-02 |            |    |   | GO:0015299 | MF | 1    | GO:0019628 | BP | 0.06 | GO:0007155 | BP | 1    |
| GO:0090549 | BP | 3E-02 |            |    |   | GO:0016616 | MF | 1    | GO:0006525 | BP | 0.06 | GO:0006351 | BP | 1    |
| GO:0018104 | BP | 3E-02 |            |    |   | GO:0008802 | MF | 1    | GO:0009585 | BP | 0.06 | GO:0006782 | BP | 1    |
| GO:0019676 | BP | 3E-02 |            |    |   | GO:0004386 | MF | 1    | GO:0030154 | BP | 0.06 | GO:0019288 | BP | 1    |
| GO:0009093 | BP | 3E-02 |            |    |   | GO:0016151 | MF | 1    | GO:0009584 | BP | 0.06 | GO:0009229 | BP | 1    |
| GO:0043085 | BP | 3E-02 |            |    |   | GO:0051287 | MF | 1    | GO:0006101 | BP | 0.06 | GO:0046654 | BP | 1    |
| GO:0006593 | BP | 3E-02 |            |    |   | GO:0003676 | MF | 1    | GO:0019344 | BP | 0.07 | GO:0042773 | BP | 1    |
| GO:0034401 | BP | 3E-02 |            |    |   | GO:0003678 | MF | 1    | GO:0055114 | BP | 0.08 | GO:0009435 | BP | 1    |
| GO:0044179 | BP | 3E-02 |            |    |   | GO:0038023 | MF | 1    | GO:0044826 | BP | 0.08 | GO:0016114 | BP | 1    |
| GO:0009851 | BP | 3E-02 |            |    |   | GO:0015344 | MF | 1    | GO:0046718 | BP | 0.08 | GO:0008360 | BP | 1    |

|            |    |       |            |    |   |            |    |      |            |    |      |
|------------|----|-------|------------|----|---|------------|----|------|------------|----|------|
| GO:0006270 | BP | 3E-02 | GO:0071949 | MF | 1 | GO:0010795 | BP | 0.08 | GO:0009228 | BP | 1    |
| GO:0015826 | BP | 3E-02 | GO:0015562 | MF | 1 | GO:0006790 | BP | 0.09 | GO:0055085 | BP | 1    |
| GO:0006310 | BP | 5E-02 | GO:0016627 | MF | 1 | GO:0006750 | BP | 0.09 | GO:0006526 | BP | 1    |
| GO:0010043 | BP | 5E-02 | GO:0016757 | MF | 1 | GO:0031388 | BP | 0.09 | GO:0071705 | BP | 1    |
| GO:0046618 | BP | 5E-02 | GO:0102132 | MF | 1 | GO:0010033 | BP | 0.09 | GO:0016042 | BP | 1    |
| GO:0051171 | BP | 5E-02 | GO:0102131 | MF | 1 | GO:0046496 | BP | 0.09 | GO:0006865 | BP | 1    |
| GO:0006518 | BP | 5E-02 | GO:0004316 | MF | 1 | GO:0000820 | BP | 0.09 | GO:0006099 | BP | 1    |
| GO:0031167 | BP | 5E-02 | GO:0051082 | MF | 1 | GO:0030420 | BP | 0.09 | GO:0009058 | BP | 1    |
| GO:0071286 | BP | 5E-02 | GO:0048038 | MF | 1 | GO:0061077 | BP | 0.09 | GO:0006281 | BP | 1    |
| GO:0097510 | BP | 5E-02 | GO:0004519 | MF | 1 | GO:0043039 | BP | 0.09 | GO:0005886 | CC | 0.00 |
| GO:0070778 | BP | 5E-02 | GO:0050661 | MF | 1 | GO:0000746 | BP | 0.09 | GO:0005829 | CC | 0.00 |
| GO:0042594 | BP | 5E-02 | GO:0016874 | MF | 1 | GO:0032359 | BP | 0.09 | GO:0005887 | CC | 0.00 |
| GO:0015914 | BP | 5E-02 | GO:0003700 | MF | 1 | GO:0006223 | BP | 0.09 | GO:0005623 | CC | 0.00 |
| GO:0015889 | BP | 5E-02 | GO:0000287 | MF | 1 | GO:0044206 | BP | 0.09 | GO:0000229 | CC | 0.00 |
| GO:0034628 | BP | 5E-02 | GO:0046872 | MF | 1 | GO:0006435 | BP | 0.09 | GO:0045272 | CC | 0.00 |
| GO:0042207 | BP | 5E-02 |            |    |   | GO:0006646 | BP | 0.09 | GO:0030964 | CC | 0.00 |
| GO:0009268 | BP | 5E-02 |            |    |   | GO:0046168 | BP | 0.09 | GO:0030288 | CC | 0.00 |
| GO:0046942 | BP | 5E-02 |            |    |   | GO:0009052 | BP | 0.09 | GO:0009279 | CC | 0.01 |
| GO:0009247 | BP | 5E-02 |            |    |   | GO:0006275 | BP | 0.10 | GO:0032993 | CC | 0.02 |
| GO:0046488 | BP | 5E-02 |            |    |   | GO:0015990 | BP | 0.10 | GO:0016020 | CC | 0.02 |
| GO:0015921 | BP | 5E-02 |            |    |   | GO:0019646 | BP | 0.10 | GO:0045282 | CC | 0.03 |
| GO:0008272 | BP | 5E-02 |            |    |   | GO:0006423 | BP | 0.10 | GO:0033202 | CC | 0.03 |
| GO:0006694 | BP | 5E-02 |            |    |   | GO:0010468 | BP | 0.10 | GO:0033281 | CC | 0.04 |
| GO:0042843 | BP | 5E-02 |            |    |   | GO:0006415 | BP | 0.10 | GO:1990063 | CC | 0.04 |
| GO:0015871 | BP | 5E-02 |            |    |   | GO:0009409 | BP | 0.10 | GO:0009330 | CC | 0.04 |
| GO:0001121 | BP | 5E-02 |            |    |   | GO:0006855 | BP | 0.10 | GO:0009321 | CC | 0.04 |
| GO:0006418 | BP | 5E-02 |            |    |   | GO:0045947 | BP | 0.11 | GO:0030430 | CC | 0.04 |
| GO:0070415 | BP | 5E-02 |            |    |   | GO:0000725 | BP | 0.11 | GO:0031246 | CC | 0.04 |
| GO:0110051 | BP | 5E-02 |            |    |   | GO:0046294 | BP | 0.11 | GO:0005739 | CC | 0.06 |
| GO:0010128 | BP | 5E-02 |            |    |   | GO:0043953 | BP | 0.12 | GO:0005634 | CC | 0.06 |
| GO:1900233 | BP | 5E-02 |            |    |   | GO:0000027 | BP | 0.14 | GO:0045203 | CC | 0.07 |
| GO:0051091 | BP | 5E-02 |            |    |   | GO:0044119 | BP | 0.15 | GO:0031230 | CC | 0.11 |
| GO:0000920 | BP | 5E-02 |            |    |   | GO:0042908 | BP | 0.15 | GO:0009274 | CC | 0.15 |
| GO:0043469 | BP | 5E-02 |            |    |   | GO:0019318 | BP | 0.16 | GO:0005618 | CC | 0.18 |
| GO:0032885 | BP | 5E-02 |            |    |   | GO:0006814 | BP | 0.16 | GO:0043190 | CC | 0.52 |
| GO:0045717 | BP | 5E-02 |            |    |   | GO:0051289 | BP | 0.16 | GO:0030956 | CC | 0.78 |
| GO:1903830 | BP | 5E-02 |            |    |   | GO:0017001 | BP | 0.18 | GO:0042597 | CC | 0.84 |
| GO:0042619 | BP | 5E-02 |            |    |   | GO:0006261 | BP | 0.18 | GO:0005576 | CC | 0.85 |
| GO:0071793 | BP | 5E-02 |            |    |   | GO:0051205 | BP | 0.19 | GO:0009338 | CC | 1    |
| GO:0006995 | BP | 5E-02 |            |    |   | GO:0006813 | BP | 0.24 | GO:0019897 | CC | 1    |
| GO:0001896 | BP | 5E-02 |            |    |   | GO:0006072 | BP | 0.25 | GO:0009331 | CC | 1    |
| GO:0046685 | BP | 5E-02 |            |    |   | GO:0006081 | BP | 0.25 | GO:0009289 | CC | 1    |
| GO:0016032 | BP | 5E-02 |            |    |   | GO:0006811 | BP | 0.27 | GO:0032153 | CC | 1    |
| GO:0032790 | BP | 5E-02 |            |    |   | GO:0046656 | BP | 0.27 | GO:0005694 | CC | 1    |
| GO:0046306 | BP | 5E-02 |            |    |   | GO:0006355 | BP | 0.28 | GO:0004803 | MF | 0.00 |

|            |    |       |            |    |      |            |    |      |
|------------|----|-------|------------|----|------|------------|----|------|
| GO:0034644 | BP | 5E-02 | GO:0030632 | BP | 0.28 | GO:0042802 | MF | 0.00 |
| GO:0043571 | BP | 5E-02 | GO:0018364 | BP | 0.28 | GO:0052890 | MF | 0.00 |
| GO:0042952 | BP | 6E-02 | GO:0006269 | BP | 0.28 | GO:0003677 | MF | 0.00 |
| GO:1901605 | BP | 7E-02 | GO:0006085 | BP | 0.29 | GO:0009977 | MF | 0.00 |
| GO:0001762 | BP | 7E-02 | GO:0010124 | BP | 0.29 | GO:0008144 | MF | 0.00 |
| GO:0042942 | BP | 7E-02 | GO:0065002 | BP | 0.29 | GO:0008785 | MF | 0.00 |
| GO:0010212 | BP | 7E-02 | GO:0043711 | BP | 0.29 | GO:0071723 | MF | 0.00 |
| GO:0015808 | BP | 7E-02 | GO:0015628 | BP | 0.30 | GO:0005297 | MF | 0.00 |
| GO:0075139 | BP | 7E-02 | GO:0034605 | BP | 0.31 | GO:0038023 | MF | 0.00 |
| GO:0042941 | BP | 7E-02 | GO:0046688 | BP | 0.31 | GO:0015344 | MF | 0.00 |
| GO:0015949 | BP | 7E-02 | GO:0006352 | BP | 0.32 | GO:0015196 | MF | 0.00 |
| GO:1902564 | BP | 7E-02 | GO:0006835 | BP | 0.33 | GO:0042959 | MF | 0.00 |
| GO:0019628 | BP | 7E-02 | GO:0007155 | BP | 0.34 | GO:0015192 | MF | 0.00 |
| GO:1902201 | BP | 7E-02 | GO:0000724 | BP | 0.35 | GO:0005302 | MF | 0.00 |
| GO:0006479 | BP | 7E-02 | GO:0019346 | BP | 0.36 | GO:0003954 | MF | 0.00 |
| GO:0050777 | BP | 7E-02 | GO:0006260 | BP | 0.38 | GO:0015643 | MF | 0.00 |
| GO:0015816 | BP | 7E-02 | GO:0036104 | BP | 0.38 | GO:0050660 | MF | 0.00 |
| GO:0006805 | BP | 7E-02 | GO:0046654 | BP | 0.47 | GO:0015343 | MF | 0.00 |
| GO:0006071 | BP | 7E-02 | GO:0006097 | BP | 0.51 | GO:0001217 | MF | 0.01 |
| GO:1990145 | BP | 7E-02 | GO:0006144 | BP | 0.52 | GO:0009055 | MF | 0.01 |
| GO:0030154 | BP | 7E-02 | GO:0007049 | BP | 0.52 | GO:0000976 | MF | 0.02 |
| GO:0044847 | BP | 7E-02 | GO:0006537 | BP | 0.53 | GO:0015035 | MF | 0.02 |
| GO:0006525 | BP | 7E-02 | GO:0006417 | BP | 0.55 | GO:0005507 | MF | 0.03 |
| GO:0019271 | BP | 7E-02 | GO:0006979 | BP | 0.55 | GO:0047106 | MF | 0.03 |
| GO:0009408 | BP | 7E-02 | GO:0009401 | BP | 0.55 | GO:0030611 | MF | 0.03 |
| GO:0042908 | BP | 9E-02 | GO:0009372 | BP | 0.55 | GO:0030674 | MF | 0.03 |
| GO:0006811 | BP | 9E-02 | GO:0034220 | BP | 0.60 | GO:0051287 | MF | 0.03 |
| GO:0006824 | BP | 9E-02 | GO:0006468 | BP | 0.66 | GO:0071949 | MF | 0.04 |
| GO:0015820 | BP | 9E-02 | GO:0009252 | BP | 0.68 | GO:0042626 | MF | 0.04 |
| GO:0010106 | BP | 9E-02 | GO:0043952 | BP | 0.73 | GO:0043295 | MF | 0.04 |
| GO:0045227 | BP | 9E-02 | GO:0006817 | BP | 0.74 | GO:0090582 | MF | 0.04 |
| GO:0000302 | BP | 9E-02 | GO:0017000 | BP | 0.74 | GO:0015528 | MF | 0.04 |
| GO:0016310 | BP | 9E-02 | GO:0009102 | BP | 0.77 | GO:0030395 | MF | 0.04 |
| GO:0006268 | BP | 9E-02 | GO:0007062 | BP | 0.77 | GO:0052590 | MF | 0.04 |
| GO:0006108 | BP | 1E-01 | GO:0000716 | BP | 0.78 | GO:0008753 | MF | 0.04 |
| GO:0015891 | BP | 1E-01 | GO:0045150 | BP | 0.78 | GO:0004549 | MF | 0.04 |
| GO:0018896 | BP | 1E-01 | GO:0002949 | BP | 0.79 | GO:0052856 | MF | 0.04 |
| GO:0051260 | BP | 1E-01 | GO:0006090 | BP | 0.79 | GO:0052857 | MF | 0.04 |
| GO:0048473 | BP | 1E-01 | GO:0019354 | BP | 0.79 | GO:0008979 | MF | 0.04 |
| GO:0043213 | BP | 1E-01 | GO:0006878 | BP | 0.79 | GO:1900750 | MF | 0.04 |
| GO:0006261 | BP | 1E-01 | GO:0006857 | BP | 0.79 | GO:0043175 | MF | 0.04 |
| GO:0019344 | BP | 1E-01 | GO:0018298 | BP | 0.80 | GO:0033812 | MF | 0.05 |
| GO:0006352 | BP | 1E-01 | GO:0030091 | BP | 0.80 | GO:0004466 | MF | 0.06 |
| GO:0006355 | BP | 1E-01 | GO:0009239 | BP | 0.80 | GO:0015503 | MF | 0.06 |
| GO:0006835 | BP | 1E-01 | GO:0006396 | BP | 0.80 | GO:0008793 | MF | 0.06 |

|            |    |       |            |    |      |            |    |      |
|------------|----|-------|------------|----|------|------------|----|------|
| GO:0033539 | BP | 1E-01 | GO:0030490 | BP | 0.80 | GO:0015616 | MF | 0.06 |
| GO:0030497 | BP | 1E-01 | GO:0009244 | BP | 0.80 | GO:0015386 | MF | 0.06 |
| GO:0010038 | BP | 1E-01 | GO:0051603 | BP | 0.80 | GO:0008766 | MF | 0.06 |
| GO:0000820 | BP | 1E-01 | GO:0006082 | BP | 0.80 | GO:0043825 | MF | 0.06 |
| GO:0019563 | BP | 1E-01 | GO:0050821 | BP | 0.83 | GO:0019899 | MF | 0.06 |
| GO:0006223 | BP | 2E-01 | GO:0006470 | BP | 0.84 | GO:0015385 | MF | 0.06 |
| GO:0044206 | BP | 2E-01 | GO:0019430 | BP | 0.87 | GO:0004368 | MF | 0.06 |
| GO:0009239 | BP | 2E-01 | GO:0006265 | BP | 0.90 | GO:0090729 | MF | 0.07 |
| GO:0006275 | BP | 2E-01 | GO:0006633 | BP | 0.92 | GO:0000900 | MF | 0.07 |
| GO:0045947 | BP | 2E-01 | GO:0071705 | BP | 0.92 | GO:0048039 | MF | 0.07 |
| GO:0019619 | BP | 2E-01 | GO:0000917 | BP | 0.95 | GO:0001000 | MF | 0.07 |
| GO:0006814 | BP | 2E-01 | GO:0019877 | BP | 0.98 | GO:0001216 | MF | 0.08 |
| GO:0061077 | BP | 2E-01 | GO:0008360 | BP | 1    | GO:0015295 | MF | 0.09 |
| GO:0006635 | BP | 2E-01 | GO:0000160 | BP | 1    | GO:0046790 | MF | 0.09 |
| GO:0000027 | BP | 2E-01 | GO:0006730 | BP | 1    | GO:0008957 | MF | 0.09 |
| GO:0019516 | BP | 3E-01 | GO:0045454 | BP | 1    | GO:0000986 | MF | 0.11 |
| GO:0043953 | BP | 3E-01 | GO:0016042 | BP | 1    | GO:0042931 | MF | 0.11 |
| GO:0019318 | BP | 3E-01 | GO:0009245 | BP | 1    | GO:0036382 | MF | 0.13 |
| GO:0071555 | BP | 3E-01 | GO:0019288 | BP | 1    | GO:0019904 | MF | 0.14 |
| GO:0043165 | BP | 3E-01 | GO:0009086 | BP | 1    | GO:0003995 | MF | 0.15 |
| GO:0046654 | BP | 4E-01 | GO:0006935 | BP | 1    | GO:0003963 | MF | 0.15 |
| GO:0046688 | BP | 4E-01 | GO:0005992 | BP | 1    | GO:0005524 | MF | 0.24 |
| GO:0046392 | BP | 4E-01 | GO:0008643 | BP | 1    | GO:0043565 | MF | 0.25 |
| GO:0000162 | BP | 4E-01 | GO:0006298 | BP | 1    | GO:0004520 | MF | 0.30 |
| GO:0051205 | BP | 4E-01 | GO:0017038 | BP | 1    | GO:0004812 | MF | 0.43 |
| GO:0006081 | BP | 4E-01 | GO:0009103 | BP | 1    | GO:0003678 | MF | 0.50 |
| GO:0046689 | BP | 4E-01 | GO:0007165 | BP | 1    | GO:0008137 | MF | 0.60 |
| GO:0042838 | BP | 4E-01 | GO:0042773 | BP | 1    | GO:0016887 | MF | 0.61 |
| GO:0006633 | BP | 4E-01 | GO:0043213 | BP | 1    | GO:0008955 | MF | 0.68 |
| GO:0006260 | BP | 4E-01 | GO:0030261 | BP | 1    | GO:0008115 | MF | 0.71 |
| GO:0017038 | BP | 4E-01 | GO:0055085 | BP | 1    | GO:0052869 | MF | 0.74 |
| GO:0030632 | BP | 5E-01 | GO:0006629 | BP | 1    | GO:0018685 | MF | 0.74 |
| GO:0006269 | BP | 5E-01 | GO:0006744 | BP | 1    | GO:0015205 | MF | 0.77 |
| GO:0031119 | BP | 5E-01 | GO:0016114 | BP | 1    | GO:0052591 | MF | 0.78 |
| GO:0006085 | BP | 5E-01 | GO:0043093 | BP | 1    | GO:0004069 | MF | 0.78 |
| GO:0006629 | BP | 5E-01 | GO:0009253 | BP | 1    | GO:0042910 | MF | 0.78 |
| GO:0006813 | BP | 5E-01 | GO:0015833 | BP | 1    | GO:0016757 | MF | 0.78 |
| GO:0042026 | BP | 5E-01 | GO:0019285 | BP | 1    | GO:0009002 | MF | 0.78 |
| GO:0034605 | BP | 5E-01 | GO:0051301 | BP | 1    | GO:0052855 | MF | 0.78 |
| GO:0009308 | BP | 5E-01 | GO:0042254 | BP | 1    | GO:0015129 | MF | 0.78 |
| GO:0006825 | BP | 5E-01 | GO:0000270 | BP | 1    | GO:0047388 | MF | 0.78 |
| GO:0022904 | BP | 5E-01 | GO:0000271 | BP | 1    | GO:0050515 | MF | 0.78 |
| GO:0046656 | BP | 5E-01 | GO:0008654 | BP | 1    | GO:0008882 | MF | 0.78 |
| GO:0006508 | BP | 6E-01 | GO:0009058 | BP | 1    | GO:0009030 | MF | 0.78 |
| GO:0019346 | BP | 6E-01 | GO:0009297 | BP | 1    | GO:0050020 | MF | 0.78 |



|            |    |       |            |    |      |            |    |      |
|------------|----|-------|------------|----|------|------------|----|------|
| GO:0065002 | BP | 6E-01 | GO:0000162 | BP | 1    | GO:0047480 | MF | 0.78 |
| GO:0006313 | BP | 6E-01 | GO:0008615 | BP | 1    | GO:0004015 | MF | 0.78 |
| GO:0009253 | BP | 6E-01 | GO:0019545 | BP | 1    | GO:0033743 | MF | 0.78 |
| GO:0009372 | BP | 6E-01 | GO:0016226 | BP | 1    | GO:0042286 | MF | 0.78 |
| GO:0007155 | BP | 7E-01 | GO:0006782 | BP | 1    | GO:0004829 | MF | 0.78 |
| GO:0034220 | BP | 7E-01 | GO:0006284 | BP | 1    | GO:0003727 | MF | 0.78 |
| GO:0006730 | BP | 7E-01 | GO:0009236 | BP | 1    | GO:0102025 | MF | 0.78 |
| GO:0002098 | BP | 7E-01 | GO:0009116 | BP | 1    | GO:0070402 | MF | 0.79 |
| GO:0006097 | BP | 8E-01 | GO:0009089 | BP | 1    | GO:0008650 | MF | 0.79 |
| GO:0019646 | BP | 8E-01 | GO:0015031 | BP | 1    | GO:0004817 | MF | 0.80 |
| GO:0006826 | BP | 8E-01 | GO:0005829 | CC | 0.00 | GO:0016776 | MF | 0.81 |
| GO:0006417 | BP | 8E-01 | GO:0005886 | CC | 0.00 | GO:0003917 | MF | 0.82 |
| GO:0070475 | BP | 8E-01 | GO:0005887 | CC | 0.00 | GO:0048027 | MF | 0.83 |
| GO:0006979 | BP | 8E-01 | GO:0032993 | CC | 0.00 | GO:0004791 | MF | 0.84 |
| GO:0015031 | BP | 8E-01 | GO:0045272 | CC | 0.00 | GO:0022877 | MF | 0.84 |
| GO:0006750 | BP | 8E-01 | GO:0030288 | CC | 0.00 | GO:0008658 | MF | 0.84 |
| GO:0031388 | BP | 8E-01 | GO:0030964 | CC | 0.00 | GO:0005351 | MF | 0.84 |
| GO:0046496 | BP | 8E-01 | GO:0005576 | CC | 0.00 | GO:0008811 | MF | 0.89 |
| GO:0010033 | BP | 8E-01 | GO:0016020 | CC | 0.00 | GO:0047519 | MF | 0.98 |
| GO:0045150 | BP | 8E-01 | GO:0031230 | CC | 0.00 | GO:0000150 | MF | 0.99 |
| GO:0015734 | BP | 8E-01 | GO:0009279 | CC | 0.00 | GO:0036383 | MF | 1    |
| GO:0000746 | BP | 8E-01 | GO:0009330 | CC | 0.00 | GO:0004674 | MF | 1    |
| GO:0006857 | BP | 8E-01 | GO:0030430 | CC | 0.00 | GO:0008519 | MF | 1    |
| GO:0006878 | BP | 8E-01 | GO:0000229 | CC | 0.00 | GO:0004450 | MF | 1    |
| GO:0019464 | BP | 8E-01 | GO:0005623 | CC | 0.00 | GO:1904680 | MF | 1    |
| GO:0043039 | BP | 8E-01 | GO:0005618 | CC | 0.01 | GO:0004521 | MF | 1    |
| GO:0030091 | BP | 8E-01 | GO:0042597 | CC | 0.01 | GO:0043023 | MF | 1    |
| GO:0009267 | BP | 8E-01 | GO:0031226 | CC | 0.01 | GO:0048037 | MF | 1    |
| GO:0006435 | BP | 8E-01 | GO:0045282 | CC | 0.03 | GO:0008094 | MF | 1    |
| GO:0016311 | BP | 8E-01 | GO:0033202 | CC | 0.03 | GO:0042803 | MF | 1    |
| GO:0009234 | BP | 8E-01 | GO:1990063 | CC | 0.05 | GO:0004314 | MF | 1    |
| GO:0046168 | BP | 8E-01 | GO:0031246 | CC | 0.05 | GO:0052588 | MF | 1    |
| GO:0000453 | BP | 8E-01 | GO:0009274 | CC | 0.05 | GO:0008913 | MF | 1    |
| GO:0044874 | BP | 8E-01 | GO:0005739 | CC | 0.06 | GO:0008854 | MF | 1    |
| GO:0006082 | BP | 8E-01 | GO:0005634 | CC | 0.06 | GO:0003992 | MF | 1    |
| GO:0009244 | BP | 8E-01 | GO:0043190 | CC | 0.08 | GO:0018626 | MF | 1    |
| GO:0051603 | BP | 8E-01 | GO:0045203 | CC | 0.08 | GO:0008177 | MF | 1    |
| GO:0006282 | BP | 8E-01 | GO:0055052 | CC | 0.09 | GO:0008484 | MF | 1    |
| GO:0006450 | BP | 8E-01 | GO:0033281 | CC | 0.12 | GO:0004156 | MF | 1    |
| GO:0015990 | BP | 8E-01 | GO:0098797 | CC | 0.18 | GO:0016831 | MF | 1    |
| GO:0003333 | BP | 8E-01 | GO:0009338 | CC | 0.24 | GO:0030170 | MF | 1    |
| GO:0010468 | BP | 8E-01 | GO:0019897 | CC | 0.24 | GO:0000104 | MF | 1    |
| GO:0006423 | BP | 8E-01 | GO:0009331 | CC | 0.25 | GO:0004029 | MF | 1    |
| GO:0065003 | BP | 8E-01 | GO:1990077 | CC | 0.52 | GO:0004040 | MF | 1    |
| GO:0006354 | BP | 8E-01 | GO:0005694 | CC | 0.56 | GO:0018618 | MF | 1    |

|            |    |       |            |    |      |            |    |   |
|------------|----|-------|------------|----|------|------------|----|---|
| GO:0006415 | BP | 8E-01 | GO:0005737 | CC | 0.76 | GO:0004518 | MF | 1 |
| GO:0006470 | BP | 8E-01 | GO:0030956 | CC | 0.79 | GO:0003918 | MF | 1 |
| GO:0019430 | BP | 9E-01 | GO:0009289 | CC | 1    | GO:0050567 | MF | 1 |
| GO:0006744 | BP | 9E-01 | GO:0032153 | CC | 1    | GO:0003988 | MF | 1 |
| GO:0009102 | BP | 9E-01 | GO:0046930 | CC | 1    | GO:0042834 | MF | 1 |
| GO:0006289 | BP | 9E-01 | GO:0070069 | CC | 1    | GO:0008483 | MF | 1 |
| GO:0006353 | BP | 9E-01 | GO:0009898 | CC | 1    | GO:0015299 | MF | 1 |
| GO:0035998 | BP | 9E-01 | GO:0009360 | CC | 1    | GO:0010181 | MF | 1 |
| GO:0002949 | BP | 9E-01 | GO:0015627 | CC | 1    | GO:0016616 | MF | 1 |
| GO:0009432 | BP | 1E+00 | GO:0042802 | MF | 0.00 | GO:0008802 | MF | 1 |
| GO:0006396 | BP | 1E+00 | GO:0004803 | MF | 0.00 | GO:0048038 | MF | 1 |
| GO:0017001 | BP | 1     | GO:0052890 | MF | 0.00 | GO:0003955 | MF | 1 |
| GO:0019545 | BP | 1     | GO:0008144 | MF | 0.00 | GO:0000166 | MF | 1 |
| GO:0016042 | BP | 1     | GO:0000976 | MF | 0.00 | GO:0004386 | MF | 1 |
| GO:0043709 | BP | 1     | GO:0015196 | MF | 0.00 | GO:0002161 | MF | 1 |
| GO:0006265 | BP | 1     | GO:0015192 | MF | 0.00 | GO:0030976 | MF | 1 |
| GO:0010124 | BP | 1     | GO:0005302 | MF | 0.00 | GO:0008800 | MF | 1 |
| GO:0000917 | BP | 1     | GO:0001216 | MF | 0.00 | GO:0004364 | MF | 1 |
| GO:0042128 | BP | 1     | GO:0071723 | MF | 0.00 | GO:0015419 | MF | 1 |
| GO:0006072 | BP | 1     | GO:0015344 | MF | 0.00 | GO:0003700 | MF | 1 |
| GO:0019679 | BP | 1     | GO:0005524 | MF | 0.00 | GO:0003684 | MF | 1 |
| GO:0046278 | BP | 1     | GO:0005297 | MF | 0.00 | GO:0051537 | MF | 1 |
| GO:0006935 | BP | 1     | GO:0009977 | MF | 0.00 | GO:0022857 | MF | 1 |
| GO:0005992 | BP | 1     | GO:0042931 | MF | 0.00 | GO:0046872 | MF | 1 |
| GO:0008643 | BP | 1     | GO:0042959 | MF | 0.00 | GO:0004300 | MF | 1 |
| GO:0006298 | BP | 1     | GO:0015643 | MF | 0.00 | GO:0015562 | MF | 1 |
| GO:0019629 | BP | 1     | GO:0038023 | MF | 0.00 | GO:0016627 | MF | 1 |
| GO:0070084 | BP | 1     | GO:0052595 | MF | 0.00 | GO:0102132 | MF | 1 |
| GO:0006430 | BP | 1     | GO:1990002 | MF | 0.00 | GO:0102131 | MF | 1 |
| GO:0006662 | BP | 1     | GO:0090582 | MF | 0.00 | GO:0004316 | MF | 1 |
| GO:0018364 | BP | 1     | GO:0052596 | MF | 0.00 | GO:0005506 | MF | 1 |
| GO:0043711 | BP | 1     | GO:0015528 | MF | 0.00 | GO:0000049 | MF | 1 |
| GO:0034599 | BP | 1     | GO:0030395 | MF | 0.00 |            |    |   |
| GO:0042450 | BP | 1     | GO:0047982 | MF | 0.00 |            |    |   |
| GO:0015969 | BP | 1     | GO:0052593 | MF | 0.00 |            |    |   |
| GO:0042744 | BP | 1     | GO:0043138 | MF | 0.00 |            |    |   |
| GO:0036104 | BP | 1     | GO:0047681 | MF | 0.00 |            |    |   |
| GO:0008033 | BP | 1     | GO:0052590 | MF | 0.00 |            |    |   |
| GO:0015833 | BP | 1     | GO:0008753 | MF | 0.00 |            |    |   |
| GO:0007049 | BP | 1     | GO:0052594 | MF | 0.00 |            |    |   |
| GO:0019285 | BP | 1     | GO:0004033 | MF | 0.00 |            |    |   |
| GO:0071705 | BP | 1     | GO:0004549 | MF | 0.00 |            |    |   |
| GO:0009450 | BP | 1     | GO:0140032 | MF | 0.00 |            |    |   |
| GO:0019544 | BP | 1     | GO:0052856 | MF | 0.00 |            |    |   |
| GO:0015813 | BP | 1     | GO:0043798 | MF | 0.00 |            |    |   |

|            |    |       |            |    |      |
|------------|----|-------|------------|----|------|
| GO:0006144 | BP | 1     | GO:0052857 | MF | 0.00 |
| GO:2001295 | BP | 1     | GO:0003677 | MF | 0.00 |
| GO:0042254 | BP | 1     | GO:0001217 | MF | 0.00 |
| GO:0000270 | BP | 1     | GO:0001108 | MF | 0.00 |
| GO:0008360 | BP | 1     | GO:0015503 | MF | 0.00 |
| GO:0006808 | BP | 1     | GO:0008766 | MF | 0.00 |
| GO:0031564 | BP | 1     | GO:0050269 | MF | 0.00 |
| GO:0008654 | BP | 1     | GO:0019899 | MF | 0.00 |
| GO:0042953 | BP | 1     | GO:0004368 | MF | 0.00 |
| GO:0006402 | BP | 1     | GO:0008785 | MF | 0.00 |
| GO:0032784 | BP | 1     | GO:0015343 | MF | 0.00 |
| GO:0009401 | BP | 1     | GO:0090729 | MF | 0.00 |
| GO:0055085 | BP | 1     | GO:0000900 | MF | 0.00 |
| GO:0009297 | BP | 1     | GO:0048039 | MF | 0.00 |
| GO:0009252 | BP | 1     | GO:0043682 | MF | 0.00 |
| GO:0008616 | BP | 1     | GO:0042626 | MF | 0.00 |
| GO:0043093 | BP | 1     | GO:0042910 | MF | 0.00 |
| GO:0006364 | BP | 1     | GO:0042623 | MF | 0.00 |
| GO:0001522 | BP | 1     | GO:0015295 | MF | 0.00 |
| GO:0009245 | BP | 1     | GO:0005507 | MF | 0.00 |
| GO:0000160 | BP | 1     | GO:0071949 | MF | 0.00 |
| GO:0009058 | BP | 1     | GO:0051287 | MF | 0.00 |
| GO:0005829 | CC | ##### | GO:0050660 | MF | 0.00 |
| GO:0005886 | CC | 8E-52 | GO:0019904 | MF | 0.00 |
| GO:0005887 | CC | 4E-15 | GO:0043565 | MF | 0.00 |
| GO:0030288 | CC | 2E-13 | GO:0003963 | MF | 0.00 |
| GO:0032993 | CC | 5E-11 | GO:0033812 | MF | 0.01 |
| GO:0022627 | CC | 1E-08 | GO:0003954 | MF | 0.01 |
| GO:0005576 | CC | 1E-07 | GO:0009055 | MF | 0.01 |
| GO:0031230 | CC | 6E-07 | GO:0070402 | MF | 0.01 |
| GO:0098797 | CC | 4E-06 | GO:0004721 | MF | 0.01 |
| GO:0045272 | CC | 3E-05 | GO:0004466 | MF | 0.01 |
| GO:0016020 | CC | 1E-04 | GO:0004520 | MF | 0.02 |
| GO:0009279 | CC | 2E-04 | GO:0008955 | MF | 0.02 |
| GO:0022625 | CC | 2E-04 | GO:0008957 | MF | 0.03 |
| GO:0030964 | CC | 3E-04 | GO:0046872 | MF | 0.03 |
| GO:0009330 | CC | 3E-04 | GO:0000006 | MF | 0.03 |
| GO:0000229 | CC | 3E-04 | GO:0008681 | MF | 0.03 |
| GO:0030430 | CC | 3E-04 | GO:0004377 | MF | 0.03 |
| GO:0042651 | CC | 3E-04 | GO:0047536 | MF | 0.03 |
| GO:0032991 | CC | 9E-04 | GO:0047106 | MF | 0.03 |
| GO:0005739 | CC | 9E-04 | GO:0034029 | MF | 0.03 |
| GO:0005634 | CC | 9E-04 | GO:0005267 | MF | 0.03 |
| GO:0045203 | CC | 2E-03 | GO:0015430 | MF | 0.03 |
| GO:0055052 | CC | 2E-03 | GO:0018742 | MF | 0.03 |

|            |    |       |            |    |      |
|------------|----|-------|------------|----|------|
| GO:0031226 | CC | 3E-03 | GO:0008898 | MF | 0.03 |
| GO:0005618 | CC | 1E-02 | GO:0036412 | MF | 0.03 |
| GO:0009338 | CC | 2E-02 | GO:0015662 | MF | 0.03 |
| GO:0042597 | CC | 2E-02 | GO:0030674 | MF | 0.03 |
| GO:0043190 | CC | 3E-02 | GO:0016823 | MF | 0.03 |
| GO:0005948 | CC | 3E-02 | GO:0009002 | MF | 0.03 |
| GO:0031160 | CC | 3E-02 | GO:0008131 | MF | 0.03 |
| GO:0034707 | CC | 3E-02 | GO:0003995 | MF | 0.04 |
| GO:0000787 | CC | 3E-02 | GO:0004812 | MF | 0.04 |
| GO:0044164 | CC | 3E-02 | GO:0016887 | MF | 0.05 |
| GO:0030894 | CC | 3E-02 | GO:0046982 | MF | 0.05 |
| GO:0030256 | CC | 3E-02 | GO:0070404 | MF | 0.05 |
| GO:0009295 | CC | 4E-02 | GO:0030552 | MF | 0.05 |
| GO:0031246 | CC | 5E-02 | GO:0008047 | MF | 0.05 |
| GO:0036405 | CC | 5E-02 | GO:0042912 | MF | 0.05 |
| GO:0046658 | CC | 5E-02 | GO:0008509 | MF | 0.05 |
| GO:1990063 | CC | 5E-02 | GO:0008979 | MF | 0.05 |
| GO:0031421 | CC | 5E-02 | GO:0015420 | MF | 0.05 |
| GO:0019898 | CC | 5E-02 | GO:1900750 | MF | 0.05 |
| GO:0070088 | CC | 5E-02 | GO:0043175 | MF | 0.05 |
| GO:0009321 | CC | 5E-02 | GO:0008658 | MF | 0.05 |
| GO:1990196 | CC | 7E-02 | GO:0015562 | MF | 0.05 |
| GO:0046930 | CC | 8E-02 | GO:0030170 | MF | 0.06 |
| GO:0071575 | CC | 9E-02 | GO:0042803 | MF | 0.06 |
| GO:1990281 | CC | 1E-01 | GO:0004314 | MF | 0.06 |
| GO:0033281 | CC | 3E-01 | GO:0008793 | MF | 0.06 |
| GO:0019897 | CC | 4E-01 | GO:0015616 | MF | 0.06 |
| GO:0031234 | CC | 5E-01 | GO:0015386 | MF | 0.06 |
| GO:0009274 | CC | 5E-01 | GO:0018541 | MF | 0.06 |
| GO:0009898 | CC | 5E-01 | GO:0043825 | MF | 0.06 |
| GO:0005623 | CC | 6E-01 | GO:0003756 | MF | 0.06 |
| GO:1990077 | CC | 8E-01 | GO:0015385 | MF | 0.06 |
| GO:0009380 | CC | 8E-01 | GO:0009883 | MF | 0.06 |
| GO:0005960 | CC | 8E-01 | GO:0005216 | MF | 0.06 |
| GO:0009986 | CC | 8E-01 | GO:0052869 | MF | 0.07 |
| GO:0005694 | CC | 8E-01 | GO:0018685 | MF | 0.07 |
| GO:0009331 | CC | 1     | GO:0046565 | MF | 0.08 |
| GO:0009289 | CC | 1     | GO:0052591 | MF | 0.08 |
| GO:0009360 | CC | 1     | GO:0015444 | MF | 0.08 |
| GO:0009317 | CC | 1     | GO:0043750 | MF | 0.08 |
| GO:0005737 | CC | 1     | GO:0001000 | MF | 0.08 |
| GO:0032153 | CC | 1     | GO:0004175 | MF | 0.08 |
| GO:0042802 | MF | 2E-72 | GO:0008137 | MF | 0.09 |
| GO:0000976 | MF | 3E-13 | GO:0018826 | MF | 0.09 |
| GO:0052890 | MF | 2E-11 | GO:0004069 | MF | 0.09 |

GO:0008144 MF 2E-09  
GO:0005302 MF 5E-09  
GO:0015196 MF 5E-09  
GO:0015192 MF 5E-09  
GO:0001216 MF 4E-07  
GO:0042931 MF 6E-07  
GO:0015643 MF 2E-06  
GO:0044212 MF 6E-06  
GO:0042970 MF 1E-05  
GO:0090729 MF 1E-05  
GO:0001217 MF 2E-05  
GO:0005297 MF 3E-05  
GO:0009977 MF 5E-05  
GO:0015344 MF 5E-05  
GO:0120159 MF 8E-05  
GO:0042959 MF 1E-04  
GO:0019904 MF 2E-04  
GO:0015565 MF 3E-04  
GO:0047982 MF 3E-04  
GO:0047681 MF 3E-04  
GO:0043138 MF 3E-04  
GO:0008047 MF 3E-04  
GO:0015276 MF 3E-04  
GO:0008979 MF 3E-04  
GO:0004549 MF 3E-04  
GO:0070968 MF 3E-04  
GO:1990002 MF 3E-04  
GO:0008753 MF 3E-04  
GO:0140032 MF 3E-04  
GO:0015528 MF 3E-04  
GO:0004033 MF 3E-04  
GO:0042912 MF 3E-04  
GO:0030395 MF 3E-04  
GO:0043565 MF 5E-04  
GO:0052689 MF 5E-04  
GO:0042910 MF 6E-04  
GO:0043825 MF 9E-04  
GO:0019899 MF 9E-04  
GO:0050269 MF 9E-04  
GO:0015503 MF 9E-04  
GO:0003756 MF 9E-04  
GO:0008793 MF 9E-04  
GO:0071723 MF 9E-04  
GO:0005509 MF 9E-04  
GO:0070181 MF 2E-03

GO:0052855 MF 0.09  
GO:0015129 MF 0.09  
GO:0008887 MF 0.09  
GO:0047388 MF 0.09  
GO:0050515 MF 0.09  
GO:0004370 MF 0.09  
GO:0030697 MF 0.09  
GO:0016298 MF 0.09  
GO:0004363 MF 0.09  
GO:0008882 MF 0.09  
GO:0004787 MF 0.09  
GO:0047480 MF 0.09  
GO:0004015 MF 0.09  
GO:0043024 MF 0.09  
GO:0046790 MF 0.09  
GO:0008909 MF 0.09  
GO:0004013 MF 0.09  
GO:0102559 MF 0.09  
GO:0004845 MF 0.09  
GO:0004829 MF 0.09  
GO:0008276 MF 0.09  
GO:0004751 MF 0.10  
GO:0004609 MF 0.10  
GO:0061711 MF 0.10  
GO:0003727 MF 0.10  
GO:0019534 MF 0.10  
GO:0003688 MF 0.10  
GO:0008650 MF 0.10  
GO:0004817 MF 0.10  
GO:0000287 MF 0.11  
GO:0048027 MF 0.11  
GO:0003979 MF 0.11  
GO:0022877 MF 0.12  
GO:0018738 MF 0.12  
GO:0000986 MF 0.12  
GO:0005351 MF 0.12  
GO:0052689 MF 0.12  
GO:0015035 MF 0.13  
GO:0030246 MF 0.15  
GO:0047519 MF 0.16  
GO:0004034 MF 0.16  
GO:0044212 MF 0.19  
GO:0003690 MF 0.21  
GO:0048038 MF 0.23  
GO:0036382 MF 0.26

GO:0018667 MF 2E-03  
GO:0000900 MF 2E-03  
GO:0043682 MF 2E-03  
GO:0038023 MF 2E-03  
GO:0046790 MF 2E-03  
GO:0015295 MF 2E-03  
GO:0016901 MF 3E-03  
GO:0003700 MF 3E-03  
GO:0070402 MF 3E-03  
GO:0005507 MF 3E-03  
GO:0048027 MF 4E-03  
GO:0004222 MF 8E-03  
GO:0003963 MF 1E-02  
GO:0008137 MF 1E-02  
GO:0004520 MF 3E-02  
GO:0004386 MF 3E-02  
GO:0015293 MF 3E-02  
GO:0015343 MF 3E-02  
GO:0031992 MF 3E-02  
GO:0015141 MF 3E-02  
GO:0030674 MF 3E-02  
GO:0004838 MF 3E-02  
GO:0015538 MF 3E-02  
GO:0015366 MF 3E-02  
GO:0034458 MF 3E-02  
GO:0015185 MF 3E-02  
GO:0036221 MF 3E-02  
GO:0001017 MF 3E-02  
GO:0071972 MF 3E-02  
GO:0004365 MF 3E-02  
GO:0015294 MF 3E-02  
GO:0032451 MF 3E-02  
GO:0036218 MF 3E-02  
GO:0005085 MF 3E-02  
GO:0000009 MF 3E-02  
GO:0004459 MF 3E-02  
GO:0018742 MF 3E-02  
GO:0008997 MF 3E-02  
GO:0004084 MF 3E-02  
GO:0036412 MF 3E-02  
GO:0047536 MF 3E-02  
GO:0015462 MF 3E-02  
GO:0030729 MF 3E-02  
GO:0034634 MF 3E-02  
GO:0050483 MF 3E-02

GO:0008757 MF 0.27  
GO:0017111 MF 0.28  
GO:0004450 MF 0.28  
GO:0036009 MF 0.28  
GO:1904680 MF 0.28  
GO:0008784 MF 0.29  
GO:0004521 MF 0.29  
GO:0043023 MF 0.29  
GO:0004386 MF 0.34  
GO:0008913 MF 0.38  
GO:0008854 MF 0.38  
GO:0004156 MF 0.44  
GO:0015109 MF 0.47  
GO:0000156 MF 0.50  
GO:0003678 MF 0.51  
GO:0000155 MF 0.52  
GO:0061579 MF 0.56  
GO:0009973 MF 0.57  
GO:0015293 MF 0.64  
GO:0018618 MF 0.65  
GO:0005509 MF 0.67  
GO:0050357 MF 0.67  
GO:0022857 MF 0.67  
GO:0008115 MF 0.69  
GO:0003918 MF 0.69  
GO:0034545 MF 0.71  
GO:0015205 MF 0.75  
GO:0015299 MF 0.75  
GO:0008840 MF 0.75  
GO:0016628 MF 0.75  
GO:0030267 MF 0.77  
GO:0008745 MF 0.78  
GO:0047434 MF 0.78  
GO:0004805 MF 0.78  
GO:0016709 MF 0.78  
GO:0033711 MF 0.78  
GO:0009029 MF 0.79  
GO:0008725 MF 0.79  
GO:0016840 MF 0.79  
GO:0034040 MF 0.79  
GO:0004222 MF 0.79  
GO:0047150 MF 0.79  
GO:0050020 MF 0.79  
GO:0051266 MF 0.79  
GO:0043115 MF 0.79

|            |    |       |
|------------|----|-------|
| GO:0044374 | MF | 3E-02 |
| GO:0004377 | MF | 3E-02 |
| GO:0000006 | MF | 3E-02 |
| GO:0045152 | MF | 3E-02 |
| GO:0015136 | MF | 3E-02 |
| GO:0050048 | MF | 3E-02 |
| GO:1903231 | MF | 3E-02 |
| GO:0050484 | MF | 3E-02 |
| GO:0015184 | MF | 3E-02 |
| GO:0008796 | MF | 3E-02 |
| GO:0043856 | MF | 3E-02 |
| GO:0003884 | MF | 3E-02 |
| GO:0016407 | MF | 3E-02 |
| GO:0015440 | MF | 3E-02 |
| GO:0080130 | MF | 3E-02 |
| GO:0015430 | MF | 3E-02 |
| GO:0051075 | MF | 3E-02 |
| GO:0003681 | MF | 3E-02 |
| GO:0034029 | MF | 3E-02 |
| GO:0047106 | MF | 3E-02 |
| GO:0008677 | MF | 3E-02 |
| GO:0015138 | MF | 3E-02 |
| GO:0016880 | MF | 3E-02 |
| GO:0015183 | MF | 3E-02 |
| GO:0004724 | MF | 3E-02 |
| GO:0019531 | MF | 3E-02 |
| GO:0016989 | MF | 3E-02 |
| GO:0005267 | MF | 3E-02 |
| GO:0017116 | MF | 3E-02 |
| GO:0008477 | MF | 3E-02 |
| GO:0018738 | MF | 3E-02 |
| GO:0008854 | MF | 3E-02 |
| GO:0009002 | MF | 4E-02 |
| GO:0046872 | MF | 5E-02 |
| GO:0016887 | MF | 5E-02 |
| GO:0052857 | MF | 5E-02 |
| GO:0052856 | MF | 5E-02 |
| GO:0030552 | MF | 5E-02 |
| GO:0015420 | MF | 5E-02 |
| GO:0052594 | MF | 5E-02 |
| GO:0008551 | MF | 5E-02 |
| GO:0052590 | MF | 5E-02 |
| GO:0000985 | MF | 5E-02 |
| GO:0090582 | MF | 5E-02 |
| GO:0008688 | MF | 5E-02 |

|            |    |      |
|------------|----|------|
| GO:0004851 | MF | 0.79 |
| GO:0016987 | MF | 0.80 |
| GO:0033743 | MF | 0.80 |
| GO:0042286 | MF | 0.80 |
| GO:0008959 | MF | 0.80 |
| GO:0005344 | MF | 0.80 |
| GO:0004425 | MF | 0.80 |
| GO:0070039 | MF | 0.80 |
| GO:0016682 | MF | 0.80 |
| GO:0102025 | MF | 0.80 |
| GO:0008776 | MF | 0.82 |
| GO:0051538 | MF | 0.82 |
| GO:0003917 | MF | 0.85 |
| GO:0031992 | MF | 0.85 |
| GO:0008127 | MF | 0.87 |
| GO:0008483 | MF | 0.87 |
| GO:0004791 | MF | 0.88 |
| GO:0015137 | MF | 0.89 |
| GO:0003700 | MF | 0.92 |
| GO:0016618 | MF | 0.92 |
| GO:0102099 | MF | 0.93 |
| GO:0003955 | MF | 0.93 |
| GO:0051537 | MF | 1    |
| GO:0000150 | MF | 1    |
| GO:0002161 | MF | 1    |
| GO:0030976 | MF | 1    |
| GO:0008106 | MF | 1    |
| GO:0003899 | MF | 1    |
| GO:0008270 | MF | 1    |
| GO:0008800 | MF | 1    |
| GO:0018580 | MF | 1    |
| GO:0036383 | MF | 1    |
| GO:0004674 | MF | 1    |
| GO:0008519 | MF | 1    |
| GO:0004672 | MF | 1    |
| GO:0016661 | MF | 1    |
| GO:0016652 | MF | 1    |
| GO:0004602 | MF | 1    |
| GO:0003848 | MF | 1    |
| GO:0016597 | MF | 1    |
| GO:0004806 | MF | 1    |
| GO:0008686 | MF | 1    |
| GO:0048037 | MF | 1    |
| GO:0008930 | MF | 1    |
| GO:0008094 | MF | 1    |

|            |    |       |            |    |   |
|------------|----|-------|------------|----|---|
| GO:0004713 | MF | 5E-02 | GO:0008782 | MF | 1 |
| GO:0005548 | MF | 5E-02 | GO:0033608 | MF | 1 |
| GO:0047100 | MF | 5E-02 | GO:0052588 | MF | 1 |
| GO:0043199 | MF | 5E-02 | GO:0000049 | MF | 1 |
| GO:0015095 | MF | 5E-02 | GO:1904047 | MF | 1 |
| GO:0015199 | MF | 5E-02 | GO:0003992 | MF | 1 |
| GO:0052593 | MF | 5E-02 | GO:0008177 | MF | 1 |
| GO:0018633 | MF | 5E-02 | GO:0015473 | MF | 1 |
| GO:0070404 | MF | 5E-02 | GO:0004355 | MF | 1 |
| GO:0043798 | MF | 5E-02 | GO:0016831 | MF | 1 |
| GO:0008509 | MF | 5E-02 | GO:0000104 | MF | 1 |
| GO:0016463 | MF | 5E-02 | GO:0004029 | MF | 1 |
| GO:0015220 | MF | 5E-02 | GO:0004040 | MF | 1 |
| GO:0004064 | MF | 5E-02 | GO:0052621 | MF | 1 |
| GO:0052596 | MF | 5E-02 | GO:0004518 | MF | 1 |
| GO:0015087 | MF | 5E-02 | GO:0050567 | MF | 1 |
| GO:0052595 | MF | 5E-02 | GO:0015297 | MF | 1 |
| GO:1900750 | MF | 5E-02 | GO:0003988 | MF | 1 |
| GO:0071949 | MF | 5E-02 | GO:0015288 | MF | 1 |
| GO:0008955 | MF | 7E-02 | GO:0004300 | MF | 1 |
| GO:0015437 | MF | 7E-02 | GO:0008236 | MF | 1 |
| GO:0015187 | MF | 7E-02 | GO:0016757 | MF | 1 |
| GO:0016213 | MF | 7E-02 | GO:0042834 | MF | 1 |
| GO:0015616 | MF | 7E-02 | GO:0008134 | MF | 1 |
| GO:0001108 | MF | 7E-02 | GO:0016616 | MF | 1 |
| GO:0019003 | MF | 7E-02 | GO:0008802 | MF | 1 |
| GO:0004368 | MF | 7E-02 | GO:0004647 | MF | 1 |
| GO:0042944 | MF | 7E-02 | GO:0003697 | MF | 1 |
| GO:0001761 | MF | 7E-02 | GO:0046983 | MF | 1 |
| GO:0018541 | MF | 7E-02 | GO:0016846 | MF | 1 |
| GO:0015180 | MF | 7E-02 | GO:0005506 | MF | 1 |
| GO:0019862 | MF | 7E-02 | GO:0010181 | MF | 1 |
| GO:0008766 | MF | 7E-02 | GO:0016151 | MF | 1 |
| GO:0042945 | MF | 7E-02 | GO:0000166 | MF | 1 |
| GO:0005216 | MF | 7E-02 |            |    |   |
| GO:0042626 | MF | 8E-02 |            |    |   |
| GO:0001000 | MF | 9E-02 |            |    |   |
| GO:0033229 | MF | 9E-02 |            |    |   |
| GO:0048039 | MF | 9E-02 |            |    |   |
| GO:0008748 | MF | 9E-02 |            |    |   |
| GO:0004175 | MF | 9E-02 |            |    |   |
| GO:0043750 | MF | 9E-02 |            |    |   |
| GO:0015190 | MF | 9E-02 |            |    |   |
| GO:0015291 | MF | 9E-02 |            |    |   |
| GO:0004450 | MF | 9E-02 |            |    |   |



|            |    |       |
|------------|----|-------|
| GO:1904680 | MF | 9E-02 |
| GO:0033812 | MF | 1E-01 |
| GO:0015297 | MF | 1E-01 |
| GO:0048037 | MF | 1E-01 |
| GO:0008236 | MF | 1E-01 |
| GO:0042623 | MF | 1E-01 |
| GO:0004722 | MF | 1E-01 |
| GO:0052869 | MF | 1E-01 |
| GO:0018685 | MF | 1E-01 |
| GO:0042803 | MF | 1E-01 |
| GO:0016628 | MF | 1E-01 |
| GO:0018826 | MF | 1E-01 |
| GO:0004069 | MF | 1E-01 |
| GO:0016836 | MF | 1E-01 |
| GO:0015129 | MF | 1E-01 |
| GO:0047388 | MF | 1E-01 |
| GO:0000986 | MF | 1E-01 |
| GO:0008882 | MF | 1E-01 |
| GO:0030697 | MF | 1E-01 |
| GO:0004015 | MF | 1E-01 |
| GO:0000287 | MF | 1E-01 |
| GO:0008909 | MF | 2E-01 |
| GO:0004013 | MF | 2E-01 |
| GO:0004845 | MF | 2E-01 |
| GO:0008276 | MF | 2E-01 |
| GO:0008460 | MF | 2E-01 |
| GO:0061711 | MF | 2E-01 |
| GO:0102025 | MF | 2E-01 |
| GO:0008658 | MF | 2E-01 |
| GO:0019534 | MF | 2E-01 |
| GO:0003688 | MF | 2E-01 |
| GO:0051538 | MF | 2E-01 |
| GO:0004466 | MF | 2E-01 |
| GO:0004721 | MF | 2E-01 |
| GO:0003995 | MF | 2E-01 |
| GO:0047004 | MF | 2E-01 |
| GO:0015137 | MF | 2E-01 |
| GO:0005351 | MF | 2E-01 |
| GO:0000156 | MF | 2E-01 |
| GO:0005524 | MF | 2E-01 |
| GO:0003690 | MF | 2E-01 |
| GO:0030246 | MF | 3E-01 |
| GO:0004622 | MF | 3E-01 |
| GO:0047519 | MF | 3E-01 |
| GO:0004034 | MF | 3E-01 |

|            |    |       |
|------------|----|-------|
| GO:0004803 | MF | 3E-01 |
| GO:0008957 | MF | 3E-01 |
| GO:0003677 | MF | 3E-01 |
| GO:0018618 | MF | 3E-01 |
| GO:0070043 | MF | 3E-01 |
| GO:0003918 | MF | 3E-01 |
| GO:0003988 | MF | 4E-01 |
| GO:0015288 | MF | 4E-01 |
| GO:0004715 | MF | 4E-01 |
| GO:0036382 | MF | 4E-01 |
| GO:0016709 | MF | 4E-01 |
| GO:0004672 | MF | 4E-01 |
| GO:0008757 | MF | 4E-01 |
| GO:0008785 | MF | 4E-01 |
| GO:0004088 | MF | 4E-01 |
| GO:0003848 | MF | 5E-01 |
| GO:0004042 | MF | 5E-01 |
| GO:0016616 | MF | 5E-01 |
| GO:0030170 | MF | 5E-01 |
| GO:0016987 | MF | 5E-01 |
| GO:0004324 | MF | 5E-01 |
| GO:0008784 | MF | 5E-01 |
| GO:0004521 | MF | 5E-01 |
| GO:0004048 | MF | 5E-01 |
| GO:0048038 | MF | 5E-01 |
| GO:0008094 | MF | 5E-01 |
| GO:0004748 | MF | 5E-01 |
| GO:0008131 | MF | 5E-01 |
| GO:0003697 | MF | 5E-01 |
| GO:0047614 | MF | 6E-01 |
| GO:0009055 | MF | 6E-01 |
| GO:0003992 | MF | 6E-01 |
| GO:0052915 | MF | 6E-01 |
| GO:0015562 | MF | 6E-01 |
| GO:0061579 | MF | 6E-01 |
| GO:0008859 | MF | 6E-01 |
| GO:0004156 | MF | 7E-01 |
| GO:0003984 | MF | 7E-01 |
| GO:0043731 | MF | 7E-01 |
| GO:0004615 | MF | 7E-01 |
| GO:0004035 | MF | 7E-01 |
| GO:0003904 | MF | 7E-01 |
| GO:0015109 | MF | 7E-01 |
| GO:0030976 | MF | 7E-01 |
| GO:0004673 | MF | 7E-01 |

|            |    |       |
|------------|----|-------|
| GO:0022857 | MF | 7E-01 |
| GO:0050357 | MF | 7E-01 |
| GO:0047661 | MF | 7E-01 |
| GO:0003994 | MF | 8E-01 |
| GO:0009381 | MF | 8E-01 |
| GO:0004490 | MF | 8E-01 |
| GO:0004644 | MF | 8E-01 |
| GO:0008441 | MF | 8E-01 |
| GO:0015159 | MF | 8E-01 |
| GO:0003678 | MF | 8E-01 |
| GO:0003899 | MF | 8E-01 |
| GO:0003993 | MF | 8E-01 |
| GO:0015205 | MF | 8E-01 |
| GO:0003954 | MF | 8E-01 |
| GO:0052591 | MF | 8E-01 |
| GO:0015501 | MF | 8E-01 |
| GO:0004029 | MF | 8E-01 |
| GO:0033983 | MF | 8E-01 |
| GO:0004347 | MF | 8E-01 |
| GO:0005247 | MF | 8E-01 |
| GO:0000908 | MF | 8E-01 |
| GO:0016153 | MF | 8E-01 |
| GO:0047434 | MF | 8E-01 |
| GO:0018659 | MF | 8E-01 |
| GO:0008745 | MF | 8E-01 |
| GO:0004805 | MF | 8E-01 |
| GO:0003957 | MF | 8E-01 |
| GO:0052621 | MF | 8E-01 |
| GO:0008887 | MF | 8E-01 |
| GO:0052855 | MF | 8E-01 |
| GO:0030955 | MF | 8E-01 |
| GO:0004789 | MF | 8E-01 |
| GO:0008936 | MF | 8E-01 |
| GO:0050066 | MF | 8E-01 |
| GO:0009029 | MF | 8E-01 |
| GO:0004853 | MF | 8E-01 |
| GO:0008839 | MF | 8E-01 |
| GO:0047646 | MF | 8E-01 |
| GO:0008893 | MF | 8E-01 |
| GO:0004370 | MF | 8E-01 |
| GO:0004363 | MF | 8E-01 |
| GO:0016840 | MF | 8E-01 |
| GO:0050515 | MF | 8E-01 |
| GO:0034028 | MF | 8E-01 |
| GO:0034040 | MF | 8E-01 |

|            |    |       |
|------------|----|-------|
| GO:0004332 | MF | 8E-01 |
| GO:0050308 | MF | 8E-01 |
| GO:0016298 | MF | 8E-01 |
| GO:0008186 | MF | 8E-01 |
| GO:0004309 | MF | 8E-01 |
| GO:0046421 | MF | 8E-01 |
| GO:0047480 | MF | 8E-01 |
| GO:0003877 | MF | 8E-01 |
| GO:0004540 | MF | 8E-01 |
| GO:0003856 | MF | 8E-01 |
| GO:0004787 | MF | 8E-01 |
| GO:0004417 | MF | 8E-01 |
| GO:0008990 | MF | 8E-01 |
| GO:0008689 | MF | 8E-01 |
| GO:0004070 | MF | 8E-01 |
| GO:0008837 | MF | 8E-01 |
| GO:0004019 | MF | 8E-01 |
| GO:0004165 | MF | 8E-01 |
| GO:0102559 | MF | 8E-01 |
| GO:0019143 | MF | 8E-01 |
| GO:0004818 | MF | 8E-01 |
| GO:0004641 | MF | 8E-01 |
| GO:0045303 | MF | 8E-01 |
| GO:0008797 | MF | 8E-01 |
| GO:0030604 | MF | 8E-01 |
| GO:0008836 | MF | 8E-01 |
| GO:0050480 | MF | 8E-01 |
| GO:0004526 | MF | 8E-01 |
| GO:0004425 | MF | 8E-01 |
| GO:0005344 | MF | 8E-01 |
| GO:0004639 | MF | 8E-01 |
| GO:0008959 | MF | 8E-01 |
| GO:0004648 | MF | 8E-01 |
| GO:0008692 | MF | 8E-01 |
| GO:0004746 | MF | 8E-01 |
| GO:0003871 | MF | 8E-01 |
| GO:0008987 | MF | 8E-01 |
| GO:0004654 | MF | 8E-01 |
| GO:0004618 | MF | 8E-01 |
| GO:0003868 | MF | 8E-01 |
| GO:0004844 | MF | 8E-01 |
| GO:0004829 | MF | 8E-01 |
| GO:0043333 | MF | 8E-01 |
| GO:0033743 | MF | 8E-01 |
| GO:0042286 | MF | 8E-01 |

|            |    |       |
|------------|----|-------|
| GO:0019146 | MF | 8E-01 |
| GO:0004422 | MF | 8E-01 |
| GO:0003937 | MF | 8E-01 |
| GO:0004358 | MF | 8E-01 |
| GO:0004643 | MF | 8E-01 |
| GO:0003727 | MF | 8E-01 |
| GO:0004427 | MF | 8E-01 |
| GO:0003879 | MF | 8E-01 |
| GO:0015648 | MF | 8E-01 |
| GO:0030234 | MF | 8E-01 |
| GO:0008667 | MF | 8E-01 |
| GO:0004637 | MF | 8E-01 |
| GO:0055041 | MF | 8E-01 |
| GO:0008728 | MF | 8E-01 |
| GO:0031072 | MF | 8E-01 |
| GO:0008776 | MF | 8E-01 |
| GO:0008650 | MF | 8E-01 |
| GO:0031402 | MF | 8E-01 |
| GO:0004765 | MF | 8E-01 |
| GO:0004817 | MF | 8E-01 |
| GO:0004518 | MF | 8E-01 |
| GO:0015171 | MF | 8E-01 |
| GO:0016881 | MF | 8E-01 |
| GO:0050897 | MF | 8E-01 |
| GO:0003917 | MF | 9E-01 |
| GO:0004812 | MF | 9E-01 |
| GO:0022877 | MF | 9E-01 |
| GO:0004791 | MF | 9E-01 |
| GO:0008863 | MF | 9E-01 |
| GO:0004485 | MF | 9E-01 |
| GO:0008840 | MF | 9E-01 |
| GO:0015299 | MF | 9E-01 |
| GO:0016811 | MF | 9E-01 |
| GO:0047780 | MF | 9E-01 |
| GO:0102099 | MF | 9E-01 |
| GO:0008811 | MF | 9E-01 |
| GO:0008134 | MF | 9E-01 |
| GO:0004096 | MF | 9E-01 |
| GO:0003989 | MF | 9E-01 |
| GO:0016791 | MF | 1E+00 |
| GO:0050660 | MF | 1E+00 |
| GO:0015035 | MF | 1E+00 |
| GO:0004823 | MF | 1E+00 |
| GO:0008892 | MF | 1     |
| GO:0000150 | MF | 1     |

|            |    |   |
|------------|----|---|
| GO:0106029 | MF | 1 |
| GO:0047154 | MF | 1 |
| GO:0004467 | MF | 1 |
| GO:0003960 | MF | 1 |
| GO:0051537 | MF | 1 |
| GO:0008127 | MF | 1 |
| GO:0004397 | MF | 1 |
| GO:0015424 | MF | 1 |
| GO:0008106 | MF | 1 |
| GO:0016896 | MF | 1 |
| GO:0004075 | MF | 1 |
| GO:0030145 | MF | 1 |
| GO:0008806 | MF | 1 |
| GO:0004750 | MF | 1 |
| GO:0003955 | MF | 1 |
| GO:0004155 | MF | 1 |
| GO:0008253 | MF | 1 |
| GO:0008726 | MF | 1 |
| GO:0004151 | MF | 1 |
| GO:0030151 | MF | 1 |
| GO:0003983 | MF | 1 |
| GO:0018580 | MF | 1 |
| GO:0036383 | MF | 1 |
| GO:0004499 | MF | 1 |
| GO:0050334 | MF | 1 |
| GO:0008260 | MF | 1 |
| GO:0008705 | MF | 1 |
| GO:0008519 | MF | 1 |
| GO:0061710 | MF | 1 |
| GO:0004356 | MF | 1 |
| GO:0003908 | MF | 1 |
| GO:0008235 | MF | 1 |
| GO:0017111 | MF | 1 |
| GO:0016661 | MF | 1 |
| GO:0016652 | MF | 1 |
| GO:0004089 | MF | 1 |
| GO:0102955 | MF | 1 |
| GO:0004602 | MF | 1 |
| GO:0097163 | MF | 1 |
| GO:0008171 | MF | 1 |
| GO:0070063 | MF | 1 |
| GO:0004824 | MF | 1 |
| GO:0016992 | MF | 1 |
| GO:0036009 | MF | 1 |
| GO:0016410 | MF | 1 |

|            |    |   |
|------------|----|---|
| GO:0008933 | MF | 1 |
| GO:0004820 | MF | 1 |
| GO:0008686 | MF | 1 |
| GO:0008932 | MF | 1 |
| GO:0043023 | MF | 1 |
| GO:0051087 | MF | 1 |
| GO:0003725 | MF | 1 |
| GO:0005506 | MF | 1 |
| GO:0008775 | MF | 1 |
| GO:0000155 | MF | 1 |
| GO:0008198 | MF | 1 |
| GO:0000175 | MF | 1 |
| GO:0008881 | MF | 1 |
| GO:0015419 | MF | 1 |
| GO:0009982 | MF | 1 |
| GO:0004314 | MF | 1 |
| GO:0015103 | MF | 1 |
| GO:0047456 | MF | 1 |
| GO:0008967 | MF | 1 |
| GO:0004802 | MF | 1 |
| GO:0003934 | MF | 1 |
| GO:0052588 | MF | 1 |
| GO:0008913 | MF | 1 |
| GO:1904047 | MF | 1 |
| GO:0018626 | MF | 1 |
| GO:0070006 | MF | 1 |
| GO:0043546 | MF | 1 |
| GO:0015473 | MF | 1 |
| GO:0004355 | MF | 1 |
| GO:0016831 | MF | 1 |
| GO:0008908 | MF | 1 |
| GO:0080030 | MF | 1 |
| GO:0009013 | MF | 1 |
| GO:0035529 | MF | 1 |
| GO:0047429 | MF | 1 |
| GO:0000049 | MF | 1 |
| GO:0008320 | MF | 1 |
| GO:0004300 | MF | 1 |
| GO:0016757 | MF | 1 |
| GO:0020037 | MF | 1 |
| GO:0008289 | MF | 1 |
| GO:0047570 | MF | 1 |
| GO:0009007 | MF | 1 |
| GO:0008483 | MF | 1 |
| GO:0000166 | MF | 1 |

GO:0003743 MF 1  
 GO:0004364 MF 1  
 GO:0004806 MF 1  
 GO:0051287 MF 1  
 GO:0003755 MF 1  
 GO:0008270 MF 1  
 GO:0016788 MF 1

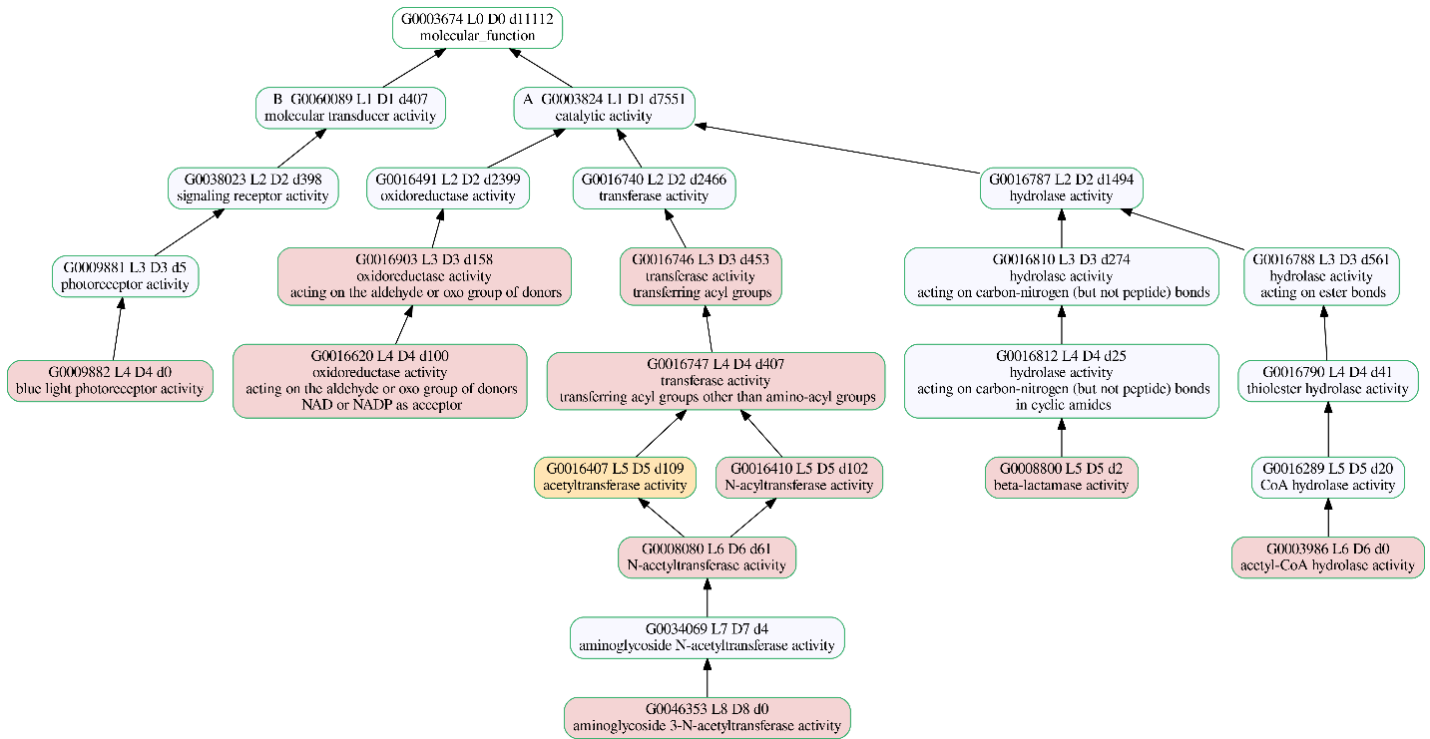

Figure S1. A section of GO hierarchy subgraph for the terms significantly enriched in clinical isolates, nodes are color-coded according to the p-value: red for p-value of less than 0.005, orange for p-value between 0.005 and 0.01, and gray for p-values larger than 0.01.



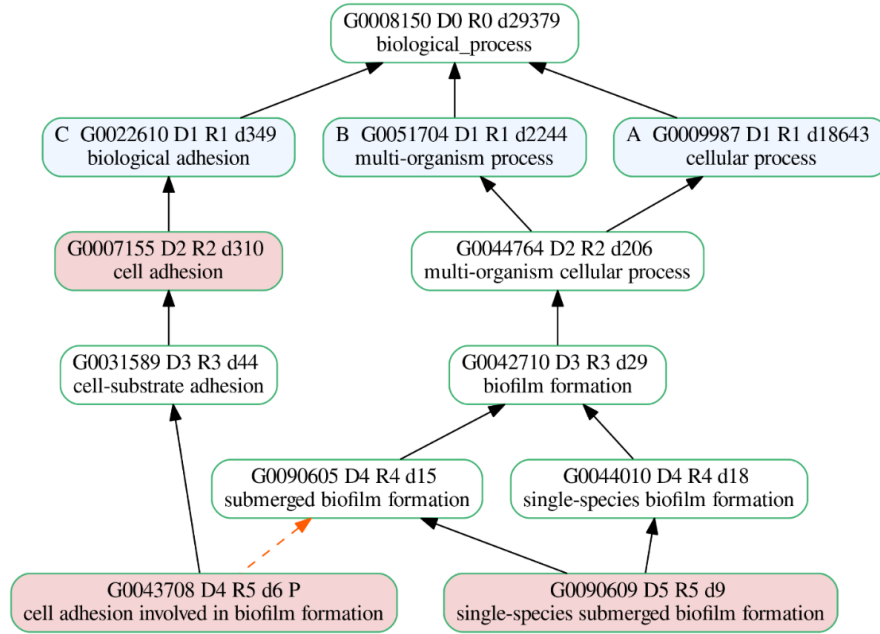

Figure S2. GO hierarchy of significant terms related to biofilm formation in drug resistance mechanisms of *A. baumannii*; nodes are color-coded according to the p-value: red for p-value of less than 0.005, orange for p-value between 0.005 and 0.01, and gray for p-values larger than 0.01.
